# Supplementary material for: Sex Differences in Cancer Driver Genes and Biomarkers
Source: Oxford University Press journal article supplement (doi:10.1158/0008-5472.can-18-0362), 2018-10-01
Supplement: 00085472can180362-sup-196527_2_supp_4837884_p6kprb.xlsx [file 00085472can180362-sup-196527_2_supp_4837884_p6kprb.xlsx]

## Sheet: SNVMutationLoad
Tumour type	Optimal Box-Cox lambda	Transformed male mean	Transformed female mean	Difference in Mean	95% CI		p-value	q-value	MV Sex p-value	MV Sex q-value	MV Sex Estimate	MV Sex Error	MSI-adjusted t-test p-value	MSI-adjutsed t-test q-value	MSI MV p-value
LAML	0.5	4.08744	3.7936	0.293838	-0.199718	0.787395	0.241725	0.483449	NA	NA	NA	NA	NA	NA	NA
PCPG	0.2	3.32631	3.36613	-0.039821	-0.250152	0.170509	0.709059	0.811172	NA	NA	NA	NA	NA	NA	NA
THCA	0.1	3.11104	2.98421	0.12683	-0.00772017	0.261379	0.0645522	0.145242	NA	NA	NA	NA	NA	NA	NA
THYM	-0.1	1.87071	1.87595	-0.00524186	-0.281541	0.271057	0.970084	0.970084	NA	NA	NA	NA	NA	NA	NA
KIRC	0.5	10.4692	10.6307	-0.161455	-1.05093	0.728015	0.721041	0.811172	NA	NA	NA	NA	NA	NA	NA
SARC	-0.2	2.48625	2.44249	0.043757	-0.0524123	0.139926	0.37062	0.65473	NA	NA	NA	NA	NA	NA	NA
KIRP	0.6	15.8491	13.6423	2.20679	0.814376	3.59921	0.00215028	0.0138545	0.00630301	0.018909	-1.8611	0.674232	NA	NA	NA
GBM	0.7	20.4582	22.0136	-1.55539	-2.97368	-0.137093	0.0317602	0.0952806	0.0785629	0.0942754	1.20332	0.681399	NA	NA	NA
LGG	-0.1	2.89512	2.87352	0.0216032	-0.051967	0.0951733	0.564102	0.781064	NA	NA	NA	NA	NA	NA	NA
LIHC	-0.1	3.50706	3.34796	0.1591	0.048882	0.269319	0.00486043	0.0218719	0.00964552	0.019291	-0.177435	0.068118	NA	NA	NA
HNSC	-0.1	3.6884	3.71783	-0.0294349	-0.123787	0.0649169	0.539372	0.781064	NA	NA	NA	NA	NA	NA	NA
PAAD	-0.6	1.55734	1.55513	0.00220868	-0.00879837	0.0132157	0.691235	0.811172	NA	NA	NA	NA	0.6754	0.6862	NA
BLCA	0.1	6.83412	6.28316	0.550956	0.199845	0.902068	0.00230908	0.0138545	0.000608009	0.00364806	-0.620699	0.179345	NA	NA	NA
LUAD	0.1	6.90266	6.53845	0.364212	0.0579579	0.670467	0.0198648	0.0715134	0.775901	0.775901	-0.0448803	0.157549	NA	NA	NA
LUSC	0.3	13.7951	12.7889	1.00614	-0.0571905	2.06948	0.0633709	0.145242	NA	NA	NA	NA	NA	NA	NA
STES	-0.1	3.86806	3.92563	-0.0575718	-0.192131	0.0769872	0.400113	0.65473	NA	NA	NA	NA	0.0006307	0.0018921	0.023
COADREAD	-0.3	2.54355	2.54954	-0.00599441	-0.0463385	0.0343496	0.770425	0.815744	NA	NA	NA	NA	0.6862	0.6862	NA
SKCM	0.1	7.85776	7.0746	0.783165	0.293088	1.27324	0.00185245	0.0138545	0.0247595	0.0371392	-0.6924	0.306162	NA	NA	NA
PANCANCER	0	1.86767	1.69995	0.167721	0.138867	0.196575	1.0117e-29	-	4.53413e-06	-	-0.0461217	0.0100485	NA	NA	NA

## Sheet: PGA
Tumour Type	Optimal Box-Cox lambda	Transformed male mean	Transformed female mean	Difference in Mean	95% CI		p-value	q-value	MV Sex p-value	MV Sex q-value	MV Sex Estimate	MV Sex Error	MSI-adjusted t-test p-value	MSI-adjutsed t-test q-value	MSI MV p-value
THCA	-1.9	0.16177	0.124204	0.0375651	-0.00487336	0.0800035	0.082468	0.188857	NA	NA	NA	NA	NA	NA	NA
LAML	-1.2	0.284809	0.198487	0.0863221	-0.00857852	0.181223	0.0743654	0.188857	NA	NA	NA	NA	NA	NA	NA
THYM	-1	0.242217	0.335496	-0.0932788	-0.233839	0.0472809	0.191295	0.264871	NA	NA	NA	NA	NA	NA	NA
PAAD	0.1	2.39734	1.97871	0.418633	-0.102035	0.9393	0.11432	0.226236	NA	NA	NA	NA	NA	NA	NA
LGG	0.2	2.79346	2.95366	-0.160199	-0.373005	0.0526083	0.139768	0.228711	NA	NA	NA	NA	NA	NA	NA
KIRC	0.2	3.53429	3.12938	0.404916	0.139761	0.67007	0.00284774	0.0170864	0.0143867	0.0191822	-0.343125	0.13971	NA	NA	NA
KIRP	0.2	3.72631	3.75772	-0.0314077	-0.54638	0.483565	0.903911	0.903911	NA	NA	NA	NA	NA	NA	NA
PCPG	0.3	3.94106	4.04632	-0.105256	-0.626619	0.416107	0.690608	0.731232	NA	NA	NA	NA	NA	NA	NA
GBM	0.5	6.84418	7.21594	-0.371753	-0.793542	0.0500361	0.0839363	0.188857	NA	NA	NA	NA	NA	NA	NA
STES	0.5	7.95745	6.3006	1.65685	0.923699	2.38999	1.18558e-05	0.000213404	0.00243582	0.00974328	-1.2441	0.4083	NA	NA	NA
LUAD	0.5	7.83186	7.38631	0.445542	-0.222528	1.11361	0.190707	0.264871	NA	NA	NA	NA	NA	NA	NA
LIHC	0.5	7.84999	8.46957	-0.619581	-1.41407	0.174909	0.125687	0.226236	NA	NA	NA	NA	NA	NA	NA
SARC	0.5	8.0578	9.60483	-1.54703	-2.67925	-0.414811	0.00761253	0.0342564	0.0207066	0.0207066	1.28441	0.551481	NA	NA	NA
HNSC	0.6	9.66894	7.78136	1.88758	1.00644	2.76871	3.42255e-05	0.00030803	0.00809431	0.0161886	-1.38873	0.521854	NA	NA	NA
COADREAD	0.6	9.33611	9.09978	0.236332	-0.565923	1.03859	0.563117	0.672827	NA	NA	NA	NA	NA	NA	NA
BLCA	0.6	10.3664	10.6969	-0.33046	-1.56537	0.904452	0.598068	0.672827	NA	NA	NA	NA	NA	NA	NA
SKCM	0.6	10.8791	11.5909	-0.711772	-1.8614	0.437859	0.224027	0.288035	NA	NA	NA	NA	NA	NA	NA
LUSC	0.8	21.8973	19.9542	1.94304	-0.167007	4.05308	0.070908	0.188857	NA	NA	NA	NA	NA	NA	NA
PANCANCER	0.4	5.66188	4.83868	0.8232	0.669443	0.976958	1.51924e+25	-	0.150331	-	-0.101037	0.07024	NA	NA	NA
