# Supplementary material for: Sex Differences in Cancer Driver Genes and Biomarkers
Source: Oxford University Press journal article supplement (doi:10.1158/0008-5472.can-18-0362), 2018-10-01
Supplement: 00085472can180362-sup-196527_2_supp_4837886_p5kprb.xlsx [file 00085472can180362-sup-196527_2_supp_4837886_p5kprb.xlsx]

## Sheet: PANCAN
Bin Information				Proportion		ΔProportion	Confidence Interval		p/q-values
Bin Number	Chromosome	Start Location	End Location	Male	Female	Male - Female	Lower	Upper	Prop test p-value	Prop test q-value	MLR p-value	MLR q-value	Genes in Bin
1	1	1p36.32	1p36.32	0.26354	0.233775	0.0297651	0.00910428	0.050426	0.0049206	0.0102186	0.654252	0.765566	ACAP3, ACTRT2, AGRN, ANKRD65, ATAD3A, ATAD3B, ATAD3C, AURKAIP1, B3GALT6, C1orf159, C1orf170, C1orf222, C1orf233, C1orf86, CALML6, CCNL2, CDK11A, CDK11B, CPSF3L, DDX11L1, DVL1, FAM132A, FAM138A, FAM213B, FAM41C, FAM87B, GABRD, GLTPD1, GNB1, HES4, HES5, ISG15, KLHL17, LINC00115, LINC00982, MIB2, MIR200A, MIR200B, MIR429, MMEL1, MMP23B, MORN1, MRPL20, MXRA8, NADK, NOC2L, OR4F16, OR4F29, OR4F5, PANK4…
2	1	1p36.32	1p36.21	0.297304	0.2582	0.0391041	0.01772	0.0604881	0.000353294	0.000919963	0.251392	0.495434	AJAP1, MIR4417, MIR4689, NPHP4, KCNAB2, CHD5, RPL22, RNF207, ICMT, LINC00337, GPR153, HES3, ACOT7, HES2, ESPN, MIR4252, PLEKHG5, TNFRSF25, NOL9, TAS1R1, ZBTB48, KLHL21, PHF13, THAP3, DNAJC11, snoU13.ENSG00000239166.1, CAMTA1, VAMP3, PER3, UTS2, TNFRSF9, PARK7, ERRFI1, RN7SL729P, SLC45A1, RERE, SNORA77.ENSG00000221083.1, ENO1, CA6, RN7SL451P, SLC2A7, SLC2A5, SCARNA16.ENSG00000252404.1, GPR157, MIR…
3	1	1p36.21	1p36.21	0.26354	0.230286	0.0332543	0.0126551	0.0538536	0.00162737	0.00377091	0.358486	0.565904	KAZN, TMEM51, C1orf195, FHAD1, EFHD2, CTRC, CELA2A, CELA2B, CASP9, DNAJC16, SCARNA21.ENSG00000251866.1, AGMAT, DDI2, RSC1A1, PLEKHM2, FBLIM1, SLC25A34, TMEM82, SPEN, snoU13.ENSG00000238818.1, ZBTB17, C1orf64, HSPB7, CLCNKA, CLCNKB, FAM131C, EPHA2, ARHGEF19, ANO7P1, C1orf134, RSG1, FBXO42, SZRD1, SPATA21, NECAP2, CROCCP3, ATP13A2, CROCCP2, CROCC, ESPNP, MFAP2, MIR3675, MST1L, NBPF1, U1.ENSG0000022…
4	1	1p36.1-p35	1p36.1-p35	0.291676	0.247383	0.0442933	0.0231297	0.065457	4.40458e-05	0.000128711	0.107125	0.428721	SDHB, PADI2, PADI1, PADI3, MIR3972, PADI4, PADI6, RCC2, snoU13.ENSG00000239020.1, ARHGEF10L, ACTL8, IGSF21, KLHDC7A, PAX7, TAS1R2, ALDH4A1, MIR4695, MIR1290, IFFO2, UBR4, EMC1, MRTO4, AKR7A3, AKR7L, AKR7A2, PQLC2, RN7SL85P, CAPZB, RN7SL277P, snoU13.ENSG00000239027.1, MINOS1, NBL1, HTR6, TMCO4, RNF186, OTUD3, PLA2G2E, PLA2G2A, RN7SL304P, PLA2G5, PLA2G2D, PLA2G2F, PLA2G2C, UBXN10, VWA5B1, CAMK2N1, …
5	1	1p36.11	1p35.3	0.265182	0.224006	0.0411761	0.0206731	0.0616792	8.99211e-05	0.000254293	0.0890075	0.394958	WDTC1, TMEM222, SYTL1, MAP3K6, FCN3, CD164L2, GPR3, WASF2, AHDC1, FGR, IFI6, FAM76A, STX12, PPP1R8, SCARNA1, THEMIS2, RPA2, SMPDL3B, XKR8, EYA3, RN7SL559P, PTAFR, DNAJC8, ATPIF1, SESN2, MED18, PHACTR4, RNU6ATAC27P, RCC1, SNHG3, SNORA73B, snoU13.ENSG00000238821.1, TRNAU1AP, SNHG12, SNORD99, TAF12, RAB42, RNU11, GMEB1, SCARNA24.ENSG00000252777.1, YTHDF2, OPRD1, EPB41, TMEM200B, SRSF4, MECR, PTPRU
6	1	1p34	1p33-p32	0.245018	0.208304	0.0367133	0.0167326	0.056694	0.000341259	0.000893047	0.130614	0.454727	LAPTM5, MATN1, MIR4420, RN7SKP91, SDC3, PUM1, SNORD103A, SNORD103B, SNORD85, NKAIN1, SNRNP40, ZCCHC17, FABP3
7	1	1p35.1	1p35.1	0.239156	0.204117	0.0350387	0.0152115	0.0548659	0.000571766	0.00143899	0.15343	0.45883	SERINC2, TINAGL1, HCRTR1, PEF1, COL16A1, BAI2, MIR4254, SPOCD1, PTP4A2, KHDRBS1, TMEM39B, MIR5585, KPNA6, TXLNA, CCDC28B, IQCC, DCDC2B, TMEM234, EIF3I, MTMR9LP, FAM167B, LCK, HDAC1, MARCKSL1, TSSK3, BSDC1, FAM229A, RN7SL122P, ZBTB8B, ZBTB8A, ZBTB8OS, RBBP4, SYNC, KIAA1522, YARS, S100PBP, FNDC5, HPCA, TMEM54, RNF19B, FKSG48
8	1	1p34	1p35-p34.3	0.230715	0.195743	0.0349719	0.0154223	0.0545216	0.000491586	0.00125969	0.104301	0.428721	AK2, ADC, TRIM62, ZNF362, A3GALT2, PHC2, MIR3605, RN7SKP16, ZSCAN20, CSMD2, HMGB4, RNA5SP42, C1orf94, MIR552, SMIM12, GJB5, GJB4, GJB3, GJA4, DLGAP3, SNORD112.ENSG00000252728.1, ZMYM6NB, ZMYM6, ZMYM1, SFPQ, RN7SL136P, ZMYM4, RN7SL503P, SNORA62.ENSG00000201542.1, RNY5P1, KIAA0319L, NCDN, TFAP2E, PSMB2, RN7SL281P, C1orf216, CLSPN, AGO4, AGO1, AGO3, TEKT2, ADPRHL2, COL8A2, TRAPPC3, MAP7D1, RN7SL131P…
9	1	1p34.3	1p33	0.223447	0.192952	0.0304948	0.0110979	0.0498917	0.00218594	0.00487206	0.287673	0.51901	GRIK3, MIR4255, RNA5SP43, ZC3H12A, MEAF6, MIR5581, SNIP1, DNALI1, GNL2, RSPO1, C1orf109, CDCA8, EPHA10, snoU13.ENSG00000238871.1, MANEAL, YRDC, C1orf122, MTF1, INPP5B, SNORA63.ENSG00000252448.1, SF3A3, FHL3, UTP11L, POU3F1, MIR3659, RRAGC, MYCBP, GJA9, RHBDL2, AKIRIN1, NDUFS5, MACF1, RNA5SP44, KIAA0754, BMP8A, PABPC4, SNORA55, HEYL, HPCAL4, NT5C1A, PPIE, BMP8B, OXCT2, TRIT1, MYCL, MFSD2A, CAP1, P…
10	1	1p33	1p33	0.218523	0.195394	0.0231286	0.00374405	0.0425131	0.0201002	0.0358397	0.22435	0.476086	AGBL4
11	1	1p33	1p32.3	0.210785	0.18388	0.0269055	0.00787935	0.0459316	0.00587257	0.0119728	0.219998	0.476086	BEND5, snoU13.ENSG00000239144.1, ELAVL4, DMRTA2
12	1	1p33	1p32.2	0.225557	0.195743	0.0298137	0.0103297	0.0492976	0.00286009	0.00621656	0.137202	0.457792	FAF1, CDKN2C, MIR4421, C1orf185, snoU13.ENSG00000238618.1, RNF11, TTC39A, EPS15, OSBPL9, SNORA26.ENSG00000212624.1, NRD1, MIR761, RAB3B, RNA5SP48, RN7SL290P, TXNDC12, KTI12, BTF3L4, ZFYVE9, RN7SL788P, CC2D1B, ORC1, PRPF38A, ZCCHC11, snoU13.ENSG00000239063.1, GPX7, FAM159A, SELRC1, RN7SL62P, ZYG11B, ZYG11A, ECHDC2, SCP2, MIR1273F, MIR5095, MIR1273G, PODN, SLC1A7, CPT2, C1orf123, MAGOH, LRP8, SLC25…
13	1	1p32-p31	1p31.3	0.222274	0.191556	0.0307182	0.0113668	0.0500695	0.00198025	0.00447044	0.114948	0.440199	DAB1, OMA1, RN7SL713P, TACSTD2, MYSM1, JUN, FGGY, MIR4711, HOOK1, CYP2J2, RN7SL475P, C1orf87, NFIA, TM2D1, INADL, RN7SL180P, L1TD1, KANK4, USP1, DOCK7, ANGPTL3, ATG4C
14	1	1p31.3	1p31.2	0.22415	0.193301	0.0308493	0.0114357	0.0502629	0.00195699	0.00443697	0.181911	0.470364	LINC00466, RNA5SP49, FOXD3, ALG6, ITGB3BP, EFCAB7, RN7SL488P, DLEU2L, PGM1, RN7SL130P, ROR1, UBE2U, CACHD1, MIR4794, RAVER2, JAK1, MIR3671, AK4, DNAJC6, LEPROT, LEPR, snoU13.ENSG00000238931.1, RN7SL854P, PDE4B, SGIP1, MIR3117, TCTEX1D1, INSL5, WDR78, MIER1, SLC35D1, C1orf141, SNORA31.ENSG00000252433.1, IL23R, RNU4ATAC4P, IL12RB2, SERBP1, RN7SL392P, GADD45A, GNG12, DIRAS3, WLS, MIR1262, RPE65, DEP…
15	1	1p31.1	1p31.1	0.216413	0.192952	0.0234608	0.00415701	0.0427646	0.0179	0.0323554	0.317523	0.541748	LRRC7, RN7SL538P, PIN1P1, LRRC40, RN7SL242P, SRSF11, ANKRD13C, HHLA3, CTH, PTGER3, ZRANB2, MIR186
16	1	1p31.1	1p31.1	0.22415	0.195045	0.0291047	0.00965377	0.0485556	0.00354138	0.00751116	0.141681	0.45883	NEGR1
17	1	1p31.1	1p33-p32	0.227667	0.205164	0.0225031	0.00279624	0.0422099	0.0260848	0.04426	0.629029	0.745908	RN7SKP19, RNA5SP50, RNU4ATAC8P, LRRIQ3, FPGT, TNNI3K, LRRC53, C1orf173, CRYZ, TYW3, LHX8, SLC44A5, ACADM, RABGGTB, SNORD45C, SNORD45A, SNORD45B, MSH4, ASB17, ST6GALNAC3, ST6GALNAC5, PIGK, AK5, ZZZ3, RNA5SP20, RN7SL370P, USP33, FAM73A, RNA5SP21, NEXN, FUBP1, DNAJB4, GIPC2, RNA5SP22, PTGFR, RNA5SP23, IFI44L, IFI44, ELTD1
18	1	1p33-p32	1p21.3	0.249941	0.222959	0.0269826	0.00666419	0.0473009	0.0095754	0.0185079	0.254418	0.4956	RN7SKP247, LPHN2, TTLL7, PRKACB, SNORA2.ENSG00000199959.1, SAMD13, UOX, DNASE2B, RPF1, GNG5, SPATA1, CTBS, C1orf180, SSX2IP, LPAR3, MCOLN2, WDR63, MCOLN3, MIR4423, SYDE2, C1orf52, BCL10, DDAH1, CYR61, SNORD81.ENSG00000199934.1, ZNHIT6, COL24A1, RNA5SP51, ODF2L, CLCA2, CLCA1, CLCA4, CLCA3P, SH3GLB1, HS2ST1, LMO4, RNA5SP52, RN7SL583P, PKN2, GTF2B, CCBL2, RBMXL1, GBP3, GBP1, GBP2, GBP7, GBP4, GBP5, …
19	1	1p22	1p21.3	0.232356	0.210049	0.0223075	0.00244401	0.0421711	0.0286415	0.0482867	0.49268	0.64354	DPYD, MIR137HG
20	1	1p21.3	1p22	0.232122	0.208653	0.0234687	0.00363591	0.0433016	0.0210887	0.0369754	0.303995	0.531528	SNX7, LPPR5, LPPR4, PALMD, FRRS1, AGL, SLC35A3, HIAT1, SASS6, TRMT13, LRRC39, DBT, RTCA, MIR553, CDC14A, GPR88, VCAM1, EXTL2, SLC30A7, DPH5, SCARNA16.ENSG00000252765.1, snoU13.ENSG00000238296.1, S1PR1, OLFM3
21	1	1p21	1p21	0.230715	0.207955	0.0227598	0.00295835	0.0425612	0.0250987	0.0430052	0.443359	0.611076	COL11A1, RN7SKP285, AMY1A, AMY1B, AMY1C, AMY2A, AMY2B, RNPC3
22	1	1p13.3	1p13.3	0.2483	0.221563	0.026737	0.0064631	0.0470108	0.0100917	0.0192286	0.364691	0.565904	PRMT6, NTNG1, VAV3, SLC25A24, NBPF4, SLC25A24P1, NBPF5P, NBPF6, FAM102B, HENMT1, PRPF38B, FNDC7, STXBP3, AKNAD1, SPATA42, GPSM2, CLCC1, WDR47, TAF13, C1orf194, KIAA1324, SCARNA2, TMEM167B, SARS, CELSR2, PSRC1, MYBPHL, SORT1, PSMA5, SYPL2, ATXN7L2, CYB561D1, AMIGO1, GPR61, GNAI3, RNU6V, MIR197, GNAT2, AMPD2, GSTM1, GSTM2, GSTM4, GSTM5, GSTM3, EPS8L3, CSF1, AHCYL1, STRIP1, ALX3, UBL4B, SLC6A17, KCN…
23	1	1p11.1	1p12	0.198359	0.185276	0.0130831	-0.00579748	0.0319637	0.17971	0.247791	NA	NA	TBX15, WARS2, snoU13.ENSG00000238679.1, HAO2, HSD3B2, HSD3B1, LINC00622, ZNF697, PHGDH, HMGCS2, REG4, ADAM30
24	1	1p13-p11	1p13-p11	0.136928	0.135031	0.00189709	-0.0146117	0.0184059	0.846332	0.890342	NA	NA	NOTCH2
25	1	1q21	1q21.1	0.102227	0.0973482	0.00487921	-0.00957024	0.0193287	0.527151	0.613454	NA	NA	ACP6, ANKRD20A12P, ANKRD34A, ANKRD35, BCL9, BOLA1, CD160, CHD1L, FAM72B, FAM72C, FAM72D, FCGR1A, FCGR1B, FCGR1C, FMO5, GJA5, GJA8, GNRHR2, GPR89A, GPR89B, GPR89C, HFE2, HIST2H2AA3, HIST2H2AA4, HIST2H2AB, HIST2H2AC, HIST2H2BA, HIST2H2BE, HIST2H2BF, HIST2H3A, HIST2H3C, HIST2H3D, HIST2H4A, HIST2H4B, HYDIN2, ITGA10, LINC00623, LINC00624, LIX1L, NBPF10, NBPF11, NBPF12, NBPF14, NBPF15, NBPF16, NBPF20, …
26	1	1q21.2	1q23.2	0.0546307	0.0439637	0.010667	0.000233626	0.0211004	0.0494637	0.0793228	0.401745	0.568724	SF3B4, MTMR11, OTUD7B, VPS45, PLEKHO1, RN7SL480P, ANP32E, CA14, snoU13.ENSG00000238526.1, APH1A, C1orf54, C1orf51, MRPS21, PRPF3, RPRD2, TARS2, ECM1, LINC00568, ADAMTSL4, MIR4257, C1orf138, RN7SL473P, RN7SL600P, MCL1, ENSA, SNORA40.ENSG00000253047.1, GOLPH3L, HORMAD1, CTSS, CTSK, ARNT, SETDB1, CERS2, ANXA9, FAM63A, PRUNE, BNIPL, C1orf56, CDC42SE1, MLLT11, GABPB2, SEMA6C, LYSMD1, SCNM1, TNFAIP8L2,…
27	1	1q23.2	1q23.2	0.0487691	0.0422191	0.00654993	-0.00353887	0.0166387	0.216786	0.289415	NA	NA	OR10J5, APCS, CRP, DUSP23, FCRL6, SLAMF8, C1orf204, SNORD64.ENSG00000212161.1, VSIG8, CCDC19, TAGLN2, IGSF9, SLAMF9, PIGM, KCNJ10, KCNJ9, IGSF8, ATP1A2, ATP1A4, CASQ1, PEA15, DCAF8, PEX19, COPA, NCSTN, NHLH1, VANGL2, SLAMF6, CD84, SLAMF1, CD48, SLAMF7, LY9, CD244, ITLN1, ITLN2, F11R, TSTD1, USF1, ARHGAP30, PVRL4, KLHDC9, PFDN2, NIT1, DEDD, ACA64.ENSG00000238934.1, UFC1, USP21, B4GALT3, PPOX, ADAM…
28	1	1q23	1q23	0.0572098	0.0457083	0.0115015	0.000863564	0.0221395	0.037592	0.0621804	0.185678	0.470477	PBX1, SNORD112.ENSG00000252359.1, LMX1A, RXRG, LRRC52, MGST3, ALDH9A1, TMCO1, UCK2, RNA5SP64, FAM78B, MIR921, FMO9P, POGK, TADA1, ILDR2, MAEL, RNA5SP65, snoU13.ENSG00000238325.1, GPA33, DUSP27, POU2F1, CD247, CREG1, RCSD1, MPZL1, ADCY10, MPC2, DCAF6, MIR1255B2, GPR161, TIPRL, SFT2D2, ANKRD36BP1, TBX19, MIR557, XCL2, XCL1, DPT, LINC00626, LINC00970, RNA5SP66, ATP1B1, NME7, BLZF1, CCDC181, SLC19A2,…
29	1	1q24	1q24	0.0567409	0.0474529	0.00928802	-0.00143401	0.02001	0.0964263	0.143683	NA	NA	RABGAP1L, snoU13.ENSG00000238872.1, GPR52
30	1	1q24-q25	1q24-q25	0.0785463	0.0648988	0.0136475	0.00125078	0.0260442	0.0336012	0.0559311	0.292102	0.51901	CACYBP, MRPS14, TNN, KIAA0040, TNR, RFWD2, SCARNA3, PAPPA2, ASTN1, MIR488, FAM5B, SEC16B, RASAL2, LINC00083, TEX35, C1ORF220, C1orf220, RNA5SP69, MIR4424, RALGPS2, SNORA63.ENSG00000201791.1, ANGPTL1, FAM20B, TOR3A, ABL2, SNORA67.ENSG00000201619.1, SNORA67.ENSG00000212338.1, SOAT1, AXDND1, RN7SL374P, NPHS2, TDRD5, FAM163A, TOR1AIP2, IFRG15, TOR1AIP1, RN7SL230P, CEP350, QSOX1, LHX4, ACBD6, MIR3121,…
31	1	1q31.3	1q32.1	0.0745604	0.0659456	0.00861481	-0.00370645	0.0209361	0.179955	0.247791	NA	NA	KCNT2, MIR4735, CFH, CFHR1, CFHR2, CFHR3, CFHR4, CFHR5, F13B, ASPM, ZBTB41, CRB1, DENND1B, C1orf53, LHX9, NEK7, ATP6V1G3, PTPRC, MIR181A1HG, MIR181A1, MIR181B1, NR5A2, LINC00862, ZNF281, KIF14, DDX59, CAMSAP2, GPR25, C1orf106, KIF21B, CACNA1S, ASCL5, TMEM9, IGFN1, PKP1, TNNT2, LAD1, TNNI1, PHLDA3, CSRP1, RPS10P7, NAV1, MIR5191, MIR1231, IPO9, SHISA4, LMOD1, TIMM17A, SNORA70.ENSG00000206637.1, RNP…
32	1	1q32.1	1q32.2	0.073388	0.0628053	0.0105827	-0.00154718	0.0227127	0.0930469	0.139042	NA	NA	ATP2B4, SNORA77.ENSG00000221643.1, LAX1, ZBED6, ZC3H11A, SNRPE, LINC00303, SOX13, ETNK2, REN, KISS1, GOLT1A, PLEKHA6, PPP1R15B, PIK3C2B, MDM4, RNA5SP74, LRRN2, RNA5SP75, SCARNA20.ENSG00000251861.1, NFASC, SNORD112.ENSG00000252946.1, CNTN2, TMEM81, RBBP5, DSTYK, TMCC2, NUAK2, KLHDC8A, LEMD1, MIR135B, CDK18, MFSD4, ELK4, SLC45A3, NUCKS1, SNORA72.ENSG00000201944.1, RAB7L1, SLC41A1, PM20D1, SLC26A9, …
33	1	1q32.2	1q44	0.117702	0.110258	0.00744403	-0.00784854	0.0227366	0.352767	0.446046	NA	NA	MIR205HG, CAMK1G, LAMB3, MIR4260, G0S2, HSD11B1, TRAF3IP3, C1orf74, IRF6, DIEXF, SYT14, SERTAD4, HHAT, KCNH1, RCOR3, TRAF5, LINC00467, RD3, SLC30A1, NEK2, LPGAT1, RN7SL344P, INTS7, SNORA26.ENSG00000212187.1, DTL, MIR3122, RN7SKP98, PPP2R5A, SNORA16B, TMEM206, NENF, ATF3, RN7SL512P, FAM71A, BATF3, NSL1, TATDN3, C1orf227, FLVCR1, VASH2, ANGEL2, RPS6KC1, PROX1, SMYD2, PTPN14, CENPF, KCNK2, KCTD3, US…
34	1	1q44	1q44	0.0820633	0.0736218	0.00844153	-0.00447009	0.0213532	0.210094	0.282632	NA	NA	KIF26B
35	1	1q44	1q44	0.0815944	0.0743196	0.00727476	-0.00565443	0.020204	0.282877	0.371983	NA	NA	SMYD3, AHCTF1, CNST, SCCPDH, SNORA25.ENSG00000252011.1, SNORD112.ENSG00000252495.1, TFB2M
36	1	1q44	1q44	0.0787808	0.0718772	0.00690359	-0.0058293	0.0196365	0.301616	0.390763	NA	NA	ZNF670, ZNF695, ZNF669, C1orf229, ZNF124, MIR3916, RNA5SP82, ZNF496, NLRP3, OR2B11, OR2W5, GCSAML, OR2C3, OR2G2, OR2G3, LYPD8, MIR3124, OR11L1, OR13G1, OR14A16, OR14A2, OR14C36, OR14I1, OR14K1, OR1C1, OR2AJ1, OR2AK2, OR2G6, OR2L13, OR2L2, OR2L3, OR2L5, OR2L8, OR2M2, OR2M3, OR2M4, OR2M5, OR2M7, OR2T10, OR2T11, OR2T12, OR2T1, OR2T27, OR2T29, OR2T2, OR2T33, OR2T34, OR2T35, OR2T3, OR2T4, OR2T5, OR2T6…
37	2	2p25	2p25	0.080891	0.0882763	-0.00738537	-0.0208998	0.00612907	0.289332	0.377639	NA	NA	ACP1, FAM110C, FAM150B, SH3YL1, TMEM18, MYT1L, PXDN, SNTG2, TPO
38	2	2p25	2p25	0.0881594	0.0935101	-0.00535068	-0.0192813	0.00857996	0.464929	0.558339	NA	NA	snoU13.ENSG00000238722.1, TSSC1, TRAPPC12, ADI1, RNASEH1, RPS7, SNORA73.ENSG00000252531.1, COLEC11, ALLC, DCDC2C, RN7SL531P, SNORA31.ENSG00000252238.1, SOX11, FLJ30594, LINC00487, CMPK2, RSAD2, RNF144A, RN7SKP112, RNU6ATAC37P, LINC00299, ID2, KIDINS220, MBOAT2, snoU13.ENSG00000238888.1, ASAP2, ITGB1BP1, CPSF3, IAH1, ADAM17, snoU13.ENSG00000238462.1, YWHAQ, TAF1B, GRHL1, KLF11, CYS1, SNORA26.ENSG0…
39	2	2p24.3	2p23.3	0.0890973	0.0921144	-0.00301714	-0.0169174	0.0108831	0.693816	0.773193	NA	NA	LINC00276, FAM84A, NBAS, DDX1, snoU13.ENSG00000238371.1, MYCNOS, MYCN, RN7SL104P, SNORA40.ENSG00000251704.1, FAM49A, RN7SKP168, RAD51AP2, VSNL1, SMC6, GEN1, MSGN1, KCNS3, SNORA40.ENSG00000212455.1, NT5C1B, RDH14, MIR4757, OSR1, LINC00954, TTC32, WDR35, MATN3, LAPTM4A, RN7SL140P, SDC1, PUM2, RNA5SP86, RHOB, HS1BP3, GDF7, C2orf43, APOB, TDRD15, RN7SL117P, RNA5SP87, RN7SKP27, KLHL29, ATAD2B, UBXN2A,…
40	2	2p23.3	2p23.3	0.083939	0.0910677	-0.00712865	-0.0208444	0.00658706	0.314711	0.404738	NA	NA	AGBL5, OST4, EMILIN1, KHK, CGREF1, ABHD1, PREB, C2orf53, TCF23, SLC5A6, ATRAID, CAD, SLC30A3, DNAJC5G, TRIM54, MPV17, UCN, GTF3C2, EIF2B4, SNX17, ZNF513, PPM1G, NRBP1, IFT172, KRTCAP3, FNDC4, GCKR, C2orf16, ZNF512, CCDC121, GPN1, SNORA36.ENSG00000206731.1, SUPT7L, SLC4A1AP, MRPL33, RBKS, BRE, MIR4263, FOSL2, PLB1, RNA5SP89, PPP1CB, FAM179A, SNORD53, SNORD92, SPDYA, TRMT61B, WDR43, C2orf71, CLIP4,…
41	2	2p23.3	2p16.3	0.0783118	0.0837404	-0.00542856	-0.0186761	0.00781898	0.434367	0.52766	NA	NA	snoZ247, C2orf91, PKDCC, EML4, COX7A2L, KCNG3, SNORD75.ENSG00000221300.1, MTA3, OXER1, HAAO, THADA, ZFP36L2, PLEKHH2, RN7SKP66, DYNC2LI1, ABCG5, ABCG8, LRPPRC, PPM1B, snoU13.ENSG00000239052.1, SLC3A1, PREPL, CAMKMT, SIX3, SIX2, SRBD1, RN7SL414P, PRKCE, EPAS1, TMEM247, RN7SL817P, ATP6V1E2, RHOQ, PIGF, CRIPT, SOCS5, MCFD2, TTC7A, CALM2, C2orf61, BCYRN1, EPCAM, RN7SKP119, MIR559, MSH2, KCNK12, MSH6,…
42	2	2p16.3	2p14	0.0780774	0.0840893	-0.00601195	-0.0192676	0.00724373	0.384015	0.479791	NA	NA	MIR4431, SCARNA16.ENSG00000251942.1, ASB3, CHAC2, ERLEC1, snoU13.ENSG00000238756.1, MIR3682, GPR75, PSME4, ACYP2, C2orf73, SPTBN1, TSPYL6, EML6, RTN4, CLHC1, RPS27A, MTIF2, PRORSD1P, CCDC88A, CCDC104, SMEK2, SNORA12.ENSG00000212175.1, PNPT1, EFEMP1, RN7SKP208, MIR216A, MIR217, MIR216B, CCDC85A, RNA5SP93, snoU13.ENSG00000238690.1, SNORD78.ENSG00000212168.1, VRK2, FANCL, RNA5SP94, MIR4432, BCL11A, …
43	2	2p13-p12	2p13-p12	0.0715123	0.0729239	-0.00141163	-0.0139679	0.0111447	0.857711	0.900511	NA	NA	C1D, WDR92, PPP3R1, PNO1, CNRIP1, PLEK, APLF, ARHGAP25, FBXO48, PROKR1, BMP10, GKN2, GKN1, ANTXR1, MIR3126, RNA5SP96, GFPT1, NFU1, AAK1, RN7SL604P, SNORA36C, ANXA4, snoU13.ENSG00000238708.1, GMCL1, SNRNP27, MXD1, snoU13.ENSG00000238465.1, snoU13.ENSG00000239072.1, ASPRV1, RN7SL470P, PCBP1, C2orf42, TIA1, PCYOX1, SNRPG, FAM136A, TGFA, ADD2, FIGLA, CLEC4F, CD207, VAX2, ATP6V1B1, snoU13.ENSG00000239…
44	2	2p12	2p12	0.0677608	0.068388	-0.000627153	-0.0128475	0.0115931	0.956007	0.982148	NA	NA	LRRTM4
45	2	2p12	2p12	0.0586166	0.0610607	-0.00244406	-0.0139851	0.00909692	0.70661	0.784129	NA	NA	RNA5SP98
46	2	2p12-p11.1	2p12-p11.1	0.0682298	0.068388	-0.00015822	-0.0122603	0.0119439	1	1	NA	NA	CTNNA2
47	2	2p12	2p12	0.0611958	0.0617585	-0.000562769	-0.0122304	0.0111049	0.962718	0.985194	NA	NA	REG1A, REG1B, REG1P, REG3A, REG3G, MIR4264, LRRTM1
48	2	2p12	2p12	0.0609613	0.060014	0.000947356	-0.0106214	0.0125161	0.909404	0.9491	NA	NA	RNA5SP99, RN7SL201P
49	2	2p12	2p11.2	0.05932	0.0579204	0.0013996	-0.0100005	0.0127997	0.845355	0.890342	NA	NA	SNORD112.ENSG00000252298.1, FUNDC2P2, SUCLG1, DNAH6, TRABD2A, TMSB10, KCMF1
50	2	2p11.2	2p11.2	0.0602579	0.0582694	0.00198855	-0.00946353	0.0134406	0.766407	0.831196	NA	NA	TCF7L1, TGOLN2, RETSAT, ELMOD3, RN7SL113P, CAPG, SH2D6, RN7SL251P, RN7SL830P, MAT2A, GGCX, VAMP8, RN7SL126P, VAMP5, RNF181, C2orf68, TMEM150A, USP39, SFTPB, GNLY, ATOH8, RN7SKP83, ST3GAL5, POLR1A, IMMT, MIR4779, MRPL35, PTCD3, REEP1, SNORD94, U8.ENSG00000202537.1, SNORA19.ENSG00000251974.1, KDM3A, CHMP3, RNF103, RMND5A, CD8A, CD8B, LINC00152, PLGLB1, PLGLB2, RGPD1, RGPD2, snoU13.ENSG00000238979.1…
51	2	2p12	2p11.1	0.0567409	0.0568737	-0.000132777	-0.0112247	0.0109591	1	1	NA	NA	IGKC, IGKJ1, IGKJ2, IGKJ3, IGKJ4, IGKJ5, RNA5SP100, SLC9B1P2
52	2	2q11.1	2q11.2-q12	0.0640094	0.0638521	0.00015732	-0.0115794	0.011894	1	1	NA	NA	ANKRD20A8P, TEKT4, RN7SL575P, MAL, MRPS5, ZNF514, ZNF2, PROM2, KCNIP3, FAHD2A, FLJ14082, LINC00342, TRIM43, ANKRD36C, FAHD2CP, RN7SL210P, GPAT2, ADRA2B, ASTL, DUSP2, STARD7, TMEM127, CIAO1, SNRNP200, ITPRIPL1, NCAPH, NEURL3, ARID5A, KANSL3, FER1L5, LMAN2L, CNNM4, MIR3127, CNNM3, ANKRD23, ANKRD39, SEMA4C, FAM178B, RNA5SP101, snoU13.ENSG00000238760.1, ACTR1B, ANKRD36B, ANKRD36, COX5B, FAHD2B, RN7SL…
53	2	2q11.2	2q12.1	0.0644783	0.0687369	-0.0042586	-0.0163879	0.00787073	0.508858	0.600133	NA	NA	LONRF2, CHST10, NMS, RN7SL611P, PDCL3, snoU13.ENSG00000238328.1, RN7SL360P, NPAS2, RPL31, TBC1D8, RN7SL548P, CNOT11, RNF149, SNORD89, MIR5696, CREG2, RFX8, MAP4K4, FLJ20373, IL1R2, IL1R1, IL1RL2, IL18R1, IL1RL1, IL18RAP, MIR4772, SLC9A4, SLC9A2, MFSD9, TMEM182
54	2	2q12.1	2q14.1	0.080891	0.077111	0.00378002	-0.00925336	0.0168134	0.593152	0.678256	NA	NA	U3.ENSG00000199727.1, SNORA72.ENSG00000207249.1, POU3F3, MRPS9, GPR45, TGFBRAP1, C2orf49, FHL2, NCK2, C2orf40, UXS1, PLGLA, RGPD3, CD8BP, ST6GAL2, GACAT1, RGPD4, SLC5A7, SULT1C3, SULT1C2, SULT1C2P1, SULT1C4, GCC2, LIMS1, RANBP2, CCDC138, EDAR, SH3RF3, MIR4265, MIR4266, SEPT10, SOWAHC, BUB1, LIMS3L, LIMS3.ENSG00000256977.6, LIMS3.ENSG00000257207.4, LINC00116, MALL, MIR4267, MIR4436B1, MIR4436B2, N…
55	2	2q14.1	2q21.1	0.0710434	0.0732729	-0.00222948	-0.0147873	0.0103283	0.756184	0.824707	NA	NA	DDX18, HTR5BP, CCDC93, RN7SL111P, INSIG2, EN1, MARCO, C1QL2, RN7SL468P, STEAP3, C2orf76, DBI, TMEM37, SCTR, PCDP1, TMEM177, PTPN4, snoU13.ENSG00000238368.1, EPB41L5, TMEM185B, RALB, INHBB, FLJ14816, GLI2, TFCP2L1, CLASP1, RNU4ATAC, snoU13.ENSG00000238341.1, MKI67IP, TSN
56	2	2q21.1	2q21.1	0.0731536	0.0729239	0.00022964	-0.012316	0.0127753	1	1	NA	NA	RN7SKP102, CNTNAP5, RNA5SP102
57	2	2q14-q21	2q21.2	0.0867526	0.0837404	0.00301223	-0.010478	0.0165025	0.687152	0.769026	NA	NA	GYPC, BIN1, CYP27C1, ERCC3, MAP3K2, MIR4783, PROC, IWS1, MYO7B, LIMS2, GPR17, SFT2D3, WDR33, RNY4P7, POLR2D, AMMECR1L, SAP130, UGGT1, RN7SL206P, HS6ST1, RNA5SP103, snoU13.ENSG00000238546.1, RAB6C, CCDC115, CCDC74B, CYP4F43P, IMP4, MZT2B, POTEF, PTPN18, SMPD4, TUBA3E, CFC1B, CFC1, CYP4F30P, POTEI, POTEJ, GPR148, AMER3, ARHGEF4, SCARNA4.ENSG00000252829.2, FAM168B, PLEKHB2, CYP4F31P, MIR4784, MZT2A,…
58	2	2q21.2	2q21.2	0.104338	0.0959525	0.00838508	-0.00606433	0.0228345	0.266062	0.351629	NA	NA	NCKAP5
59	2	2q21.2	2q21.2	0.098476	0.0903699	0.00810611	-0.00597484	0.0221871	0.270345	0.356394	NA	NA	RN7SKP154, RN7SKP93, MGAT5, MIR3679, RNA5SP104, TMEM163, ACMSD, MIR5590, CCNT2, MAP3K19, RAB3GAP1, snoU13.ENSG00000238337.1, SNORA40.ENSG00000208308.1, ZRANB3, R3HDM1, UBXN4, LCT, MCM6, DARS, CXCR4, RN7SKP141
60	2	2q22.1	2q22.1	0.0947245	0.0865318	0.00819275	-0.00563346	0.022019	0.256392	0.341424	NA	NA	THSD7B
61	2	2q22.1	2q22.1	0.0928488	0.0861828	0.00666594	-0.00709512	0.020427	0.35685	0.450127	NA	NA	RNA5SP105, HNMT, SPOPL, NXPH2, RN7SKP286, SNORA72.ENSG00000206901.1, RN7SL283P
62	2	2q21.2	2q21.2	0.167644	0.131542	0.0361014	0.0191123	0.0530905	3.83855e-05	0.000112798	0.67688	0.770637	LRP1B
63	2	2q22.2	2q22.2	0.107855	0.0928123	0.0150423	0.00062543	0.0294593	0.0434293	0.0711645	0.824106	0.873345	KYNU, ARHGAP15, GTDC1, ZEB2, TEX41, snR65.ENSG00000253036.1, snoU13.ENSG00000238860.1, RNA5SP106, ACVR2A, ORC4, MBD5, SNORA48.ENSG00000212181.1
64	2	2q23.1	2q23.3	0.102931	0.0893231	0.0136077	-0.000547474	0.0277629	0.0630465	0.0986977	0.642288	0.754185	EPC2, KIF5C, LYPD6B, LYPD6, MMADHC, RND3, RBM43, NMI, TNFAIP6, RN7SL124P, RIF1, NEB, ARL5A, CACNB4, STAM2, FMNL2, PRPF40A, ARL6IP6, SNORD56.ENSG00000200377.1, RPRM
65	2	2q24.1	2q24.1	0.0975381	0.0858339	0.0117042	-0.00216896	0.0255773	0.103484	0.152046	NA	NA	GALNT13
66	2	2q24.1	2q24.1	0.0940211	0.0802512	0.0137699	0.000224697	0.0273151	0.0494297	0.0793228	0.978852	0.980655	RNA5SP107, KCNJ3, NR4A2, snoU13.ENSG00000238543.1, snoU13.ENSG00000238481.1, GPD2, GALNT5, RN7SKP281, ERMN, CYTIP, ACVR1C, ACVR1, UPP2
67	2	2q24.1	2q31.3	0.12075	0.109909	0.010841	-0.00450898	0.026191	0.173221	0.242007	NA	NA	CCDC148, RN7SL393P, PKP4, snoZ5, DAPL1, TANC1, WDSUB1, BAZ2B, MARCH7, CD302, LY75, PLA2R1, ITGB6, RBMS1, RMRPP3, MIR4785, RN7SL423P, TANK, PSMD14, TBR1, snoU13.ENSG00000238570.1, SLC4A10, DPP4, GCG, FAP, IFIH1, GCA, KCNH7, RNA5SP109, FIGN, GRB14, COBLL1, SNORA70F, RNA5SP110, RNA5SP111, SLC38A11, SCN3A, RN7SL455P, SCN2A, CSRNP3, GALNT3, TTC21B, SCN1A, RN7SKP152, SCN9A, snoU13.ENSG00000238662.1, SC…
68	2	2q32.1	2q32.1	0.0947245	0.0935101	0.00121438	-0.0128923	0.015321	0.895968	0.938803	NA	NA	UBE2E3, MIR4437, ITGA4, CERKL, NEUROD1, RNU6ATAC19P, SSFA2, PPP1R1C, RNA5SP113, PDE1A, RN7SL267P, DNAJC10, FRZB, NCKAP1, SNORA77.ENSG00000221498.1, DUSP19, NUP35, snoU13.ENSG00000238306.1, MIR548AE1, ZNF804A
69	2	2q32.1	2q32.1	0.094959	0.0903699	0.00458911	-0.00939888	0.0185771	0.540357	0.624676	NA	NA	FSIP2, U8.ENSG00000212581.1
70	2	2q32.1	2q32.1	0.101993	0.0917655	0.0102274	-0.00400005	0.0244549	0.166258	0.233205	NA	NA	ZC3H15, ITGAV, FAM171B
71	2	2q32.1	2q32	0.0998828	0.0973482	0.00253455	-0.0118553	0.0169244	0.75572	0.824707	NA	NA	ZSWIM2, RN7SKP42, CALCRL, TFPI, RNA5SP114, GULP1, MIR561, DIRC1, COL3A1, MIR1245A, COL5A2, MIR3129, WDR75, SLC40A1, ASNSD1, ANKAR, OSGEPL1, ORMDL1, PMS1, C2orf88, MSTN, HIBCH, INPP1, MFSD6, TMEM194B, RN7SKP179, NAB1, GLS, STAT1, STAT4, MYO1B, NABP1, SDPR, TMEFF2, PCGEM1
72	2	2q32	2q33	0.107386	0.094208	0.0131777	-0.00128122	0.0276367	0.0780492	0.119343	NA	NA	SNORD59.ENSG00000252517.1, SLC39A10, DNAH7, STK17B, HECW2, snoU13.ENSG00000239161.1, RN7SL820P, CCDC150, SCARNA16.ENSG00000252923.1, GTF3C3, C2orf66, PGAP1, ANKRD44, SF3B1, SNORA4.ENSG00000202434.1, COQ10B, HSPD1, HSPE1, MOB4, RFTN2, MARS2, BOLL, PLCL1
73	2	2q33	2q33.1	0.10762	0.0910677	0.0165525	0.00220916	0.0308958	0.0254486	0.0433202	0.669338	0.768833	SATB2, FTCDNL1, RN7SL717P, C2orf69, TYW5, C2orf47
74	2	2q33.1	2q33-q34	0.112309	0.094208	0.0181015	0.00352097	0.0326821	0.0161728	0.0296407	0.732911	0.809806	SPATS2L, KCTD18, SGOL2, AOX1, AOX2P, BZW1, RNA5SP115, CLK1, PPIL3, NIF3L1, ORC2, RN7SL694P, FAM126B, NDUFB3, CFLAR, CASP10
75	2	2q33-q34	2q33	0.122157	0.100488	0.0216686	0.00662086	0.0367164	0.00525909	0.0108482	0.778627	0.841017	CASP8, ALS2CR12, TRAK2, STRADB, ALS2CR11, TMEM237, MPP4, ALS2, CDK15, FZD7, snoU13.ENSG00000238770.1, SUMO1, NOP58, SNORD70.ENSG00000212534.1, SNORD70.ENSG00000212309.1, SNORD11B, SNORD11.ENSG00000238317.1, RN7SL753P, RN7SL40P, BMPR2, FAM117B, ICA1L, WDR12, CARF, NBEAL1, SNORA1.ENSG00000202059.1, CYP20A1, RN7SL670P, ABI2, RAPH1, CD28, CTLA4, ICOS
76	2	2q33.3	2q33.3	0.141852	0.113398	0.0284538	0.0125288	0.0443788	0.00053556	0.00135435	0.630813	0.745908	PARD3B
77	2	2q33.3	2q33	0.129426	0.107816	0.0216098	0.00613863	0.0370809	0.00675157	0.0133509	0.353179	0.565904	NRP2, RN7SKP178, INO80D, Vault.ENSG00000252485.1, NDUFS1, EEF1B2, SNORA41.ENSG00000207406.1, SNORD51.ENSG00000207047.2, GPR1, RN7SKP200, RN7SKP260, ZDBF2, ADAM23
78	2	2q33.3	2q33.3	0.133411	0.112352	0.0210598	0.0053472	0.0367724	0.00931184	0.0180739	0.432869	0.603946	DYTN, MDH1B, FASTKD2, CPO, KLF7, MIR2355, CREB1, METTL21A, CCNYL1, MIR4775, FZD5, PLEKHM3, RNA5SP116, snoU13.ENSG00000238582.1, CRYGEP, CRYGD, CRYGC, CRYGB, CRYGA, C2orf80, IDH1, PIKFYVE, PTH2R, RNA5SP117
79	2	2q34-q35	2q35	0.139977	0.118632	0.0213443	0.00528639	0.0374022	0.00987937	0.0188965	0.256069	0.49595	MAP2, RNA5SP118, UNC80, RPE, KANSL1L, ACADL, MYL1, LANCL1, CPS1
80	2	2q33.3-q34	2q33.3-q34	0.150293	0.124564	0.0257292	0.00927629	0.0421822	0.00240049	0.00530528	0.279331	0.517223	ERBB4
81	2	2q33.3-q34	2q33.3-q34	0.139742	0.115841	0.0239012	0.00793922	0.0398632	0.0036695	0.00775164	0.314666	0.541033	RNA5SP119
82	2	2q34	2q34	0.143728	0.117585	0.0261425	0.0100419	0.0422432	0.0016349	0.00377175	0.403338	0.568724	MIR548F2
83	2	2q34	2q34	0.147479	0.120377	0.0271027	0.010837	0.0433683	0.00122768	0.00290882	0.485906	0.639886	IKZF2
84	2	2q34	2q36.3	0.179601	0.146197	0.0334046	0.0157918	0.0510174	0.000230528	0.000621835	0.72911	0.809806	SPAG16, MIR4438, VWC2L, BARD1, SNORA70.ENSG00000207274.1, ABCA12, snoU13.ENSG00000238663.1, ATIC, FN1, LINC00607, MREG, PECR, TMEM169, XRCC5, MARCH4, SMARCAL1, RPL37A, IGFBP2, IGFBP5, RNA5SP120, TNP1, RN7SKP43, DIRC3, TNS1, RUFY4, CXCR2P1, CXCR2, CXCR1, snoU13.ENSG00000238428.1, ARPC2, AAMP, GPBAR1, PNKD, TMBIM1, snoU13.ENSG00000238736.1, C2orf62, SLC11A1, CTDSP1, MIR26B, VIL1, USP37, RN7SKP38, R…
85	2	2q36.3	2q37.3	0.221102	0.185276	0.0358263	0.0166286	0.0550241	0.000279984	0.000743796	0.787431	0.847058	MIR5702, IRS1, RHBDD1, SNORA48.ENSG00000212391.1, COL4A4, COL4A3, MFF, TM4SF20, AGFG1, MIR5703, C2orf83, SLC19A3, RNA5SP121, CCL20, DAW1, SNORA25.ENSG00000272237.1, SPHKAP, SNORD112.ENSG00000251801.1, PID1, RN7SKP283, DNER, FBXO36, TRIP12, SLC16A14, RNY4P19, SP110, SP140, SP140L, SP100, RN7SL834P, CAB39, ITM2C, GPR55, SPATA3, C2orf72, PSMD1, HTR2B, ARMC9, MIR4777, B3GNT7, NCL, SNORA75.ENSG0000020…
86	3	3p26.1	3p26.1	0.349824	0.276692	0.0731319	0.0510891	0.0951747	1.029e-10	8.87301e-10	0.762303	0.836396	CHL1, CNTN4, CNTN6, RN7SKP144, RN7SL120P, IL5RA, SNORA43.ENSG00000253049.1, TRNT1, CRBN, SUMF1, LRRN1, SETMAR, ITPR1, EGOT, snoU13.ENSG00000239126.1, BHLHE40, ARL8B, EDEM1, MIR4790, RN7SL553P
87	3	3p26.1-p25.1	3p23	0.357093	0.287509	0.0695839	0.0473526	0.0918152	1.02626e-09	7.82334e-09	0.895327	0.925537	GRM7, RNU4ATAC17P, LMCD1, LINC00312, SSUH2, CAV3, OXTR, RAD18, SNORA43.ENSG00000199815.1, SRGAP3, THUMPD3, SETD5, LHFPL4, MTMR14, CPNE9, BRPF1, OGG1, CAMK1, TADA3, ARPC4, TTLL3, RPUSD3, CIDEC, JAGN1, IL17RE, IL17RC, CRELD1, PRRT3, EMC3, CIDECP, FANCD2, FANCD2OS, BRK1, snoU13.ENSG00000238642.1, VHL, snoU13.ENSG00000238345.1, IRAK2, TATDN2, LINC00852, GHRLOS, GHRL, SEC13, ATP2B2, MIR378B, MIR885, L…
88	3	3p24.3	3p22.3	0.365533	0.290998	0.0745355	0.0522114	0.0968596	7.52767e-11	6.71111e-10	0.935709	0.946948	KCNH8, MIR4791, EFHB, RAB5A, PP2D1, KAT2B, MIR3135A, SGOL1, RNY4P22, ZNF385D, HMGB1P5, UBE2E2, UBE2E1, NKIRAS1, RPL15, NR1D2, LINC00691, THRB, MIR4792, RN7SL216P, RNA5SP125, RARB, RNA5SP126, SNORD5.ENSG00000272166.1, TOP2B, MIR4442, NGLY1, OXSM, LINC00692, LRRC3B, NEK10, SLC4A7, RN7SL859P, EOMES, CMC1, AZI2, ZCWPW2, LINC00693, RBMS3, U3.ENSG00000199927.1, TGFBR2, GADL1, RNA5SP127, STT3B, OSBPL10,…
89	3	3p22.3	3p14.2	0.40211	0.32589	0.0762205	0.0533235	0.0991174	7.7269e-11	6.77392e-10	0.669485	0.768833	ARPP21, STAC, RN7SKP227, DCLK3, HSPD1P6, TRANK1, RNU6ATAC4P, EPM2AIP1, MLH1, LRRFIP2, snoU13.ENSG00000238929.1, GOLGA4, RNA5SP129, C3orf35, ITGA9, CTDSPL, MIR26A1, VILL, PLCD1, DLEC1, ACAA1, MYD88, OXSR1, SLC22A13, SLC22A14, XYLB, ACVR2B, EXOG, SCN5A, SCN10A, SCN11A, WDR48, GORASP1, TTC21A, CSRNP1, XIRP1, CX3CR1, CCR8, SLC25A38, RPSA, SNORA62.ENSG00000202363.1, SNORA6, MOBP, MYRIP, RN7SL411P, SNO…
90	3	3p14.2	3p14.2	0.379132	0.294836	0.0842965	0.0618534	0.10674	2.57172e-13	4.22726e-12	0.723675	0.809806	FHIT, NPCDR1, U3.ENSG00000212211.1
91	3	3p21-p14	3p14.1	0.366237	0.278437	0.0878	0.0656371	0.109963	1.36624e-14	3.12453e-13	0.499381	0.649774	PTPRG, C3orf14, FEZF2, CADPS, RN7SL863P, LINC00698, SYNPR, RNA5SP134, SNTN, C3orf49, THOC7, ATXN7, PSMD6, U3.ENSG00000200222.1, PRICKLE2, ADAMTS9
92	3	3p14.1	3p14	0.354513	0.268318	0.0861953	0.0642413	0.108149	2.43679e-14	5.127e-13	0.541357	0.683153	MAGI1, SLC25A26, RN7SL482P, LRIG1
93	3	3p14	3p13	0.351934	0.266225	0.0857096	0.0638017	0.107618	3.02625e-14	5.89559e-13	0.593841	0.722471	KBTBD8, SUCLG2, FAM19A1, FAM19A4, RNA5SP135, EOGT, TMF1, MIR3136, UBA3, ARL6IP5, LMOD3, FRMD4B, MITF, RN7SL418P
94	3	3p14.1	3p12.3	0.354982	0.258897	0.096085	0.0742665	0.117904	1.488e-17	6.52241e-16	0.105932	0.428721	FOXP1, MIR1284, EIF4E3, GPR27, PROK2, RN7SL271P, LINC00877, LINC00870, RYBP, snoU13.ENSG00000238568.1, RNA5SP136, SHQ1, GXYLT2, PPP4R2, EBLN2, snoU13.ENSG00000238416.1, PDZRN3, CNTN3, RN7SL294P, FAM86DP, FRG2C, LINC00960, MIR1324, MIR4273, RN7SL92P, ZNF717
95	3	3p12.3	3p12.3	0.339273	0.250174	0.0890987	0.0675152	0.110682	1.27159e-15	3.93446e-14	0.220469	0.476086	ROBO2
96	3	3p12.3	3p12.3	0.33177	0.243545	0.0882252	0.0668002	0.10965	1.55088e-15	4.53202e-14	0.181374	0.470364	RN7SL647P, RN7SKP61, ROBO1, RN7SL751P, MIR3923
97	3	3p12.3	3p12.3	0.319343	0.233775	0.0855682	0.0643991	0.106737	5.21393e-15	1.30596e-13	0.173281	0.46908	GBE1
98	3	3p12.1	3p12.1	0.302696	0.210747	0.0919497	0.0713342	0.112565	8.62898e-18	4.12622e-16	0.0222158	0.258162	LINC00971
99	3	3p12.1	3p12.1	0.300352	0.212142	0.0882093	0.067588	0.108831	1.60155e-16	5.26509e-15	0.0500966	0.344344	CADM2
100	3	3p12.1	3p12.1	0.297773	0.205862	0.0919107	0.0714333	0.112388	5.67848e-18	2.98688e-16	0.0155087	0.234509	MIR5688
101	3	3p12.1	3p12.1	0.293552	0.201326	0.0922263	0.071877	0.112576	2.87804e-18	1.68206e-16	0.00745199	0.146883	snoZ40, RN7SKP284
102	3	3p12.1	3p11	0.289332	0.193301	0.096031	0.0758846	0.116177	5.95942e-20	1.21782e-17	0.000774953	0.0373084	VGLL3, CHMP2B, MIR4795, POU1F1
103	3	3p11	3p11.1	0.281125	0.189812	0.0913139	0.0713207	0.111307	1.8002e-18	1.24812e-16	0.000763354	0.0373084	RNU6ATAC6P, HTR1F, CGGBP1, ZNF654, C3orf38
104	3	3p11.2	3p11.2	0.269168	0.183182	0.0859855	0.0662584	0.105713	5.63862e-17	1.97728e-15	0.000544881	0.0373084	EPHA3
105	3	3p11.2	3p11.2	0.25932	0.174459	0.0848609	0.065437	0.104285	5.20498e-17	1.95558e-15	0.000754839	0.0373084	U3.ENSG00000212598.1
106	3	3q11.1	3q11	0.197421	0.151779	0.0456414	0.0275938	0.063689	9.73373e-07	3.90835e-06	0.000252339	0.0373084	ARL13B, PROS1, STX19
107	3	3q11.1	3q11.1	0.147011	0.131193	0.0158173	-0.000775408	0.0324099	0.0644742	0.100336	NA	NA	DHFRL1, NSUN3, LINC00879, MTHFD2P1, MTRNR2L12, EPHA6, ARL6, CRYBG3.ENSG00000233280.2, CRYBG3.ENSG00000080200.5, MINA, GABRR3, OR5AC1, OR5AC2, OR5H1, OR5H14, OR5H15, OR5H6, OR5H2, OR5H8P, OR5K4, OR5K3, OR5K1, CLDND1, OR5K2, CPOX, GPR15, ST3GAL6, DCBLD2, LINC00973, COL8A1, CMSS1, FILIP1L, MIR3921, TMEM30C, SNORD61.ENSG00000238377.1, TBC1D23, NIT2, TOMM70A, LNP1, TMEM45A, GPR128, SNORA31.ENSG0000025…
108	3	3q13.1	3q13.1	0.133646	0.118981	0.0146648	-0.00127262	0.0306022	0.0746413	0.114799	NA	NA	ALCAM, CBLB, LINC00882, LINC00883, CCDC54, BBX, LINC00635, LINC00636, CD47, IFT57, HHLA2, MYH15, KIAA1524, SNORA70.ENSG00000202379.1, DZIP3, RETNLB, TRAT1, DPPA2, GUCA1C, LINC00488, MORC1, U3.ENSG00000221633.1, DPPA4, MIR4445, RNU6ATAC15P
109	3	3q13	3q13.31	0.139742	0.125262	0.0144804	-0.00178441	0.0307452	0.0845481	0.128162	NA	NA	PVRL3, CD96, ZBED2, PLCXD2, PHLDB2, ABHD10, TAGLN3, TMPRSS7, C3orf52, MIR567, GCSAM, SLC9C1, CD200, BTLA, ATG3, SLC35A5, CCDC80, CD200R1L, CD200R1, GTPBP8, C3orf17, SNORD112.ENSG00000253076.1, BOC, WDR52, SPICE1, SIDT1, MIR4446, RN7SL767P, KIAA2018, NAA50, ATP6V1A, GRAMD1C, ZDHHC23, KIAA1407, QTRTD1, DRD3, ZNF80, TIGIT, MIR568, ZBTB20, MIR4796, GAP43
110	3	3q13.2-q21	3q13.2-q21	0.14279	0.131891	0.010899	-0.00563186	0.0274299	0.20347	0.275129	NA	NA	LSAMP
111	3	3q13.31	3q13.31	0.131536	0.124913	0.00662299	-0.00946122	0.0227072	0.434019	0.52766	NA	NA	RN7SL815P, LINC00903, RN7SL582P, TUSC7, MIR4447, LINC00901
112	3	3q13.32	3q13.32	0.147714	0.145499	0.002215	-0.014811	0.019241	0.821991	0.875238	NA	NA	IGSF11, C3orf30, UPK1B, B4GALT4, ARHGAP31, TMEM39A, POGLUT1, TIMMDC1, CD80, ADPRH, PLA1A, POPDC2, COX17, MAATS1, NR1I2, GSK3B, RN7SL762P, RN7SL397P, GPR156, LRRC58, FSTL1, NDUFB4, HGD, RABL3, GTF2E1, STXBP5L, MIR5682, POLQ, ARGFX, FBXO40, GOLGB1, HCLS1, RN7SL172P, snoU13.ENSG00000238670.1, IQCB1, EAF2, SLC15A2, ILDR1, CD86, CASR, SNORD112.ENSG00000252170.1, CSTA, CCDC58, FAM162A, WDR5B, KPNA1, PA…
113	3	3q26.31	3q26.31	0.113013	0.114096	-0.00108341	-0.0164007	0.0142338	0.91768	0.955841	NA	NA	NAALADL2
114	3	3q26.31	3q29	0.125674	0.131193	-0.00551921	-0.0216774	0.0106389	0.516951	0.606791	NA	NA	RN7SKP40, MIR4789, snoU13.ENSG00000271842.1, RNA5SP147, TBL1XR1, LINC00501, LINC00578, RN7SKP52, SNORA18.ENSG00000200288.1, KCNMB2, RNA5SP148, ZMAT3, PIK3CA, SNORA25.ENSG00000201957.1, KCNMB3, ZNF639, MFN1, GNB4, ACTL6A, MRPL47, NDUFB5, snoU13.ENSG00000239096.1, USP13, PEX5L, RNA5SP149, U8.ENSG00000201810.1, TTC14, CCDC39, RN7SL229P, FXR1, DNAJC19, SOX2, RN7SL703P, RNA5SP150, RN7SKP265, ATP11B, D…
115	4	4p16.3	4p15.31	0.311137	0.213189	0.097948	0.0772143	0.118682	1.0051e-19	1.3217e-17	0.000237803	0.0373084	ABCA11P, ATP5I, CPLX1, DGKQ, FGFRL1, GAK, IDUA, MFSD7, MIR571, MYL5, PCGF3, PDE6B, PIGG, RN7SL358P, RNF212, SLC26A1, TMEM175, ZNF141, ZNF595, ZNF718, ZNF721, ZNF732, ZNF876P, TMED11P, SNORA48.ENSG00000212458.1, SPON2, CTBP1, MAEA, CRIPAK, UVSSA, FAM53A, SLBP, TMEM129, TACC3, FGFR3, LETM1, RN7SL671P, WHSC1, SCARNA22, MIR943, NELFA, C4orf48, NAT8L, POLN, HAUS3, MXD4, MIR4800, ZFYVE28, RN7SL589P, RN…
116	4	4p15.32	4p15.32	0.282063	0.189114	0.0929496	0.0729618	0.112937	4.52703e-19	4.76243e-17	0.00474056	0.12289	KCNIP4
117	4	4p15.2	4p15.2	0.282298	0.186671	0.0956265	0.0756883	0.115565	3.86412e-20	1.21782e-17	0.00106274	0.0447678	GPR125, snoU13.ENSG00000238383.1, GBA3, PPARGC1A, DHX15, MIR573, RN7SL16P, SOD3, CCDC149, LGI2, SEPSECS, PI4K2B, ZCCHC4, ANAPC4, SLC34A2, SEL1L3, SMIM20, RBPJ, CCKAR, TBC1D19, SNORD74.ENSG00000200999.1, STIM2
118	4	4p15.1	4p15	0.276202	0.184229	0.0919728	0.072149	0.111797	5.71707e-19	5.01197e-17	0.00283787	0.0956363	RN7SL101P, PCDH7
119	4	4p15	4p14	0.275498	0.184927	0.0905715	0.0707399	0.110403	1.89828e-18	1.24812e-16	0.00141351	0.052928	snoU13.ENSG00000238694.1, ARAP2, DTHD1, KIAA1239, MIR4801, C4orf19, RELL1, PGM2, TBC1D1, PTTG2, KLF3, RNA5SP158, TLR10, TLR1, TLR6, FAM114A1, MIR574, TMEM156, KLHL5, WDR19, RFC1, KLB, MIR5591, RPL9, LIAS, UGDH, SMIM14, UBE2K, RN7SL558P, PDS5A, RNA5SP159, N4BP2, SNORA51.ENSG00000201863.1, RHOH, CHRNA9
120	4	4p14	4p14	0.271981	0.178297	0.093684	0.0740347	0.113333	6.94576e-20	1.21782e-17	0.000341799	0.0373084	RBM47, MIR4802, NSUN7, APBB2, snoU13.ENSG00000238351.1, RNA5SP160, UCHL1, LIMCH1, PHOX2B, LINC00682, TMEM33, DCAF4L1, SLC30A9, BEND4, SHISA3, ATP8A1, GRXCR1, RN7SKP82
121	4	4p13	4p12	0.25932	0.17411	0.0852098	0.0657939	0.104626	3.81625e-17	1.54411e-15	0.00341921	0.0960229	RN7SL691P, RN7SL193P, KCTD8, YIPF7, GUF1, GNPDA2
122	4	4p12	4p12	0.251114	0.175855	0.0752589	0.0558979	0.0946199	7.31532e-14	1.32685e-12	0.00871708	0.146883	RN7SKP199, GABRG1, GABRA2, COX7B2, GABRA4, GABRB1, snoU13.ENSG00000238301.1, COMMD8, ATP10D, CORIN, RN7SKP215, NFXL1, NIPAL1, CNGA1
123	4	4p12	4p11	0.23728	0.175506	0.0617743	0.0425892	0.0809593	4.87509e-10	3.8853e-09	0.153211	0.45883	TXK, CWH43, FRYL, OCIAD1, OCIAD2, SLAIN2, SLC10A4, TEC, ZAR1
124	4	4q12	4q12	0.211489	0.168528	0.0429613	0.0242843	0.0616383	7.98295e-06	2.69169e-05	0.724585	0.809806	DCUN1D4, LRRC66, SGCB, SPATA18, snoU13.ENSG00000239068.1, USP46, DANCR, MIR4449, SNORA26.ENSG00000212588.1, SNORA26.ENSG00000212490.1, RASL11B
125	4	4q12	4q12	0.212192	0.16783	0.0443625	0.0256925	0.0630326	4.00687e-06	1.43375e-05	0.670892	0.768833	SCFD2
126	4	4q12	4q12	0.215475	0.168876	0.0465983	0.027857	0.0653396	1.41665e-06	5.51968e-06	0.543279	0.683153	FIP1L1, LNX1, CHIC2, GSX2, snoU13.ENSG00000238753.1, PDGFRA, KIT
127	4	4q12	4q12	0.218523	0.168528	0.0499953	0.0312203	0.0687702	2.47159e-07	1.08338e-06	0.47646	0.634652	RN7SL424P, KDR, RN7SL822P, SRD5A3, TMEM165, CLOCK, RN7SKP30, PDCL2, NMU, EXOC1, CEP135, RNA5SP161
128	4	4q12	4q12	0.220633	0.172366	0.0482674	0.0293723	0.0671625	7.25872e-07	2.98288e-06	0.51443	0.664226	KIAA1211, RNA5SP162, AASDH, PPAT, PAICS, SRP72, ARL9, THEGL, HOPX, RN7SL492P
129	4	4q12	4q12	0.223681	0.173412	0.0502687	0.031308	0.0692294	2.75221e-07	1.18661e-06	0.372898	0.566066	RN7SL357P, SPINK2, REST, NOA1, POLR2B, snoU13.ENSG00000238579.1, IGFBP7, snoU13.ENSG00000238541.1, snoU13.ENSG00000238925.1
130	4	4q12	4q12	0.235639	0.182833	0.0528057	0.033475	0.0721364	1.17385e-07	5.77052e-07	0.41036	0.576213	MIR548AG1
131	4	4q13.1	4q13.1	0.24197	0.18702	0.0549493	0.0354483	0.0744503	4.66017e-08	2.52706e-07	0.369983	0.565904	LPHN3
132	4	4q13.1	4q13.1	0.242204	0.189812	0.0523924	0.032828	0.0719568	2.01945e-07	9.00196e-07	0.394387	0.568724	TECRL
133	4	4q13.1	4q13.1	0.245721	0.191905	0.0538159	0.0341646	0.0734672	1.07009e-07	5.31007e-07	0.242075	0.489213	EPHA5, MIR1269A
134	4	4q13.2	4q13.2	0.283705	0.224703	0.0590012	0.0383001	0.0797022	2.99779e-08	1.64254e-07	0.208117	0.476086	CENPC, STAP1, UBA6, GNRHR, SNORA62.ENSG00000202374.1, TMPRSS11D, TMPRSS11A, TMPRSS11F, TMPRSS11GP, FTLP10, TMPRSS11BNL, TMPRSS11B, YTHDC1, TMPRSS11E, UGT2A3, UGT2B10, UGT2B11, UGT2B15, UGT2B17, UGT2B28, UGT2B7, UGT2B4, UGT2A1, UGT2A2, SULT1B1, SULT1E1, CSN1S1, CSN2, STATH, HTN3, HTN1, CSN1S2AP, C4orf40, ODAM, FDCSP, CSN3, CABS1, SMR3A, SMR3B, PROL1, MUC7, AMTN, AMBN, ENAM, IGJ, UTP3, RUFY3, snoU1…
135	4	4q22.1-q23	4q22	0.285815	0.227844	0.0579711	0.0371937	0.0787485	5.71922e-08	2.92069e-07	0.766904	0.836396	MAPK10, RN7SKP96, MIR4452, PTPN13, SLC10A6, C4orf36, AFF1, KLHL8, MIR5705, HSD17B13, HSD17B11, RN7SL681P, NUDT9, SPARCL1, DSPP, DMP1, snoU13.ENSG00000238652.1, IBSP, MEPE, SPP1, PKD2, ABCG2, RNU6ATAC31P, PPM1K, HERC6, HERC5, HERC3, PIGY, PYURF, RN7SKP244, NAP1L5, FAM13A, TIGD2, GPRIN3, SNCA, MMRN1
136	4	4q22.1	4q22.1	0.319343	0.250872	0.0684712	0.0470211	0.0899213	5.321e-10	4.17738e-09	0.386761	0.568724	CCSER1
137	4	4q22.1	4q22.1	0.283236	0.221912	0.0613236	0.0406778	0.0819693	7.88438e-09	5.18398e-08	0.460881	0.621267	RN7SKP248
138	4	4q22	4q22	0.287925	0.225052	0.0628726	0.0421255	0.0836198	3.91926e-09	2.60954e-08	0.401485	0.568724	GRID2
139	4	4q22	4q22	0.288394	0.223657	0.0647372	0.0440109	0.0854636	1.31894e-09	9.77133e-09	0.226035	0.476086	RNA5SP164, ATOH1, SMARCAD1, HPGDS, PDLIM5, BMPR1B, UNC5C, PDHA2, RN7SKP28
140	4	4q22.3-q23	4q22.3-q23	0.288628	0.224703	0.063925	0.0431775	0.0846724	2.17041e-09	1.54275e-08	0.395443	0.568724	STPG2
141	4	4q23-q25	4q28.2	0.331536	0.264829	0.0667067	0.0449541	0.0884593	2.31684e-09	1.62488e-08	0.269909	0.505329	RAP1GDS1, TSPAN5, EIF4E, METAP1, MIR3684, ADH5, ADH4, PCNAP1, ADH6, ADH1A, ADH1B, ADH1C, ADH7, C4orf17, TRMT10A, MTTP, DAPP1, LAMTOR3, DNAJB14, H2AFZ, DDIT4L, EMCN, PPP3CA, MIR1255A, BANK1, SLC39A8, RN7SL728P, NFKB1, MANBA, UBE2D3, CISD2, snoU13.ENSG00000238948.1, SLC9B1, SLC9B2, BDH2, CENPE, TACR3, CXXC4, SNORA31.ENSG00000252136.1, TET2, RN7SL89P, PPA2, ARHGEF38, INTS12, GSTCD, NPNT, TBCK, AIMP1…
142	4	4q28.3	4q28.3	0.293083	0.234473	0.0586101	0.0376496	0.0795706	5.28115e-08	2.80594e-07	0.390039	0.568724	RN7SL205P, SNORA70.ENSG00000252014.1, PCDH10, PABPC4L
143	4	4q28.3	4q28.3	0.294021	0.22889	0.0651307	0.0442591	0.0860022	1.34445e-09	9.82198e-09	0.222346	0.476086	LINC00613, PCDH18, LINC00616, SLC7A11, LINC00498, LINC00499, LINC00500
144	4	4q31.1	4q31.21	0.29449	0.230286	0.0642039	0.0433036	0.0851043	2.38103e-09	1.64793e-08	0.359813	0.565904	CCRN4L, ELF2, RN7SL382P, RN7SL311P, MGARP, NDUFC1, NAA15, ACA64.ENSG00000239005.1, RAB33B, SETD7, MGST2, RN7SKP237, MAML3, RN7SKP253, SCOC, SNORD112.ENSG00000252300.1, CLGN, ELMOD2, UCP1, RN7SL152P, TBC1D9, RNF150
145	4	4q31.21	4q31.21	0.304807	0.243196	0.0616105	0.0404011	0.0828199	1.56833e-08	9.166e-08	0.395778	0.568724	ZNF330, snoU13.ENSG00000238695.1, IL15, INPP4B, USP38, GAB1, MIR3139, SMARCA5, GUSBP5, FREM3, GYPA, GYPB, GYPE, HHIP, ANAPC10, RN7SKP235, ABCE1, OTUD4, SMAD1, MMAA, C4orf51, ZNF827, LSM6, SLC10A7, POU4F2, TTC29, MIR548G, EDNRA, TMEM184C, PRMT10, ARHGAP10, RNA5SP165, MIR4799, RN7SL254P, NR3C2, RNA5SP166, RNA5SP167
146	4	4q31.3	4q31.3	0.303869	0.238311	0.0655575	0.0444373	0.0866776	1.59371e-09	1.14834e-08	0.371112	0.565904	DCLK2, LRBA, MAB21L2, RNA5SP168, RPS3A, SH3D19, SNORD73A, SNORD73, PRSS48, FAM160A1, RN7SKP35, PET112
147	4	4q31.3	4q31.3	0.31442	0.256455	0.0579647	0.0364659	0.0794635	1.47069e-07	6.7875e-07	0.7747	0.839466	RNA5SP169, RN7SL446P, FBXW7, MIR3140, MIR4453, TMEM154, TIGD4, ARFIP1, FHDC1, TRIM2, MND1, RN7SL419P, KIAA0922, TLR2, RNF175, SFRP2, DCHS2, PLRG1, FGB, FGA, FGG, LRAT, RBM46, NPY2R, MAP9, GUCY1A3, GUCY1B3, ASIC5, TDO2, CTSO, PDGFC, GLRB, GRIA2, FAM198B, TMEM144, RXFP1, C4orf46, ETFDH, U3.ENSG00000271817.1, PPID, FNIP2, C4orf45, RAPGEF2, U3.ENSG00000251979.1
148	4	4q32.3	4q32.3	0.346307	0.284717	0.0615898	0.0394608	0.0837187	5.52396e-08	2.84863e-07	0.521692	0.66707	FSTL5, NAF1, NPY1R, NPY5R, TKTL2, TMA16, MARCH1, RN7SKP105, FAM218A, TRIM61, TRIM60, TMEM192, KLHL2, MSMO1, CPE, MIR578, TLL1, RNA5SP170, SPOCK3, RNA5SP171, RN7SL776P, RN7SKP188, ANXA10, DDX60, snoU13.ENSG00000238744.1, DDX60L, SNORA51.ENSG00000207171.1, PALLD, CBR4, RNY4P17, SH3RF1, NEK1, CLCN3, C4orf27, MFAP3L, AADAT, HSP90AA6P, RNU6ATAC13P, GALNTL6, RN7SL253P, GALNT7, MIR548T, HMGB2, SAP30, SC…
149	4	4q34.3	4q35	0.347011	0.282275	0.0647356	0.0426347	0.0868365	1.09677e-08	6.70815e-08	0.402795	0.568724	LINC00290, RN7SKP13, TENM3, MIR1305, DCTD, FAM92A1P2, RN7SKP67, U3.ENSG00000252048.1, WWC2, snoU13.ENSG00000238319.1, CLDN22, CLDN24, snoU13.ENSG00000238596.1, CDKN2AIP, ING2, snoU13.ENSG00000239116.1, ENPP6, RWDD4, STOX2, TRAPPC11, RN7SL28P, IRF2, SNORD79, CASP3, CCDC111, MLF1IP, ACSL1, HELT, KIAA1430, LRP2BP, MIR3945, MIR4455, SLC25A4, SNX25, ANKRD37, UFSP2, C4orf47, CCDC110, PDLIM3, SORBS2, sn…
150	4	4q35.2	4q35.2	0.324736	0.262387	0.0623496	0.0406823	0.084017	2.04135e-08	1.15457e-07	0.446523	0.6117	DUX4L2, DUX4L3, DUX4L4, DUX4L5, DUX4L6, DUX4L7, DUX4, FRG1, FRG2, HSP90AA4P, RNA5SP174, RNA5SP175, TRIML1, TRIML2, ZFP42
151	5	5p15.3	5p15.33	0.0776084	0.0701326	0.00747585	-0.00514006	0.0200918	0.257626	0.342201	NA	NA	AHRR, BRD9, C5orf55, CCDC127, CEP72, EXOC3, LRRC14B, MIR4456, PDCD6, PLEKHG4B, SDHA, SLC9A3, TPPP, TRIP13, ZDHHC11B, ZDHHC11, NKD2, MIR4635, SLC12A7, SLC6A18, SLC6A19, TERT
152	5	5p15.33	5p15.2	0.0966002	0.0851361	0.0114642	-0.00235528	0.0252836	0.109492	0.160426	NA	NA	MIR4457, CLPTM1L, SLC6A3, IRX4, LPCAT1, MIR4277, MRPL36, NDUFS6, SDHAP3, C5orf38, IRX2, IRX1, RN7SKP73, ADAMTS16, KIAA0947, MED10, UBE2QL1, NSUN2, SRD5A1, PAPD7, RN7SKP79, RNA5SP176, ADCY2, C5orf49, MTRR, FASTKD3, MIR4458, SEMA5A, MIR4636, SNORD123, TAS2R1, RNA5SP177, FAM173B, CCT5, CMBL, MARCH6, ROPN1L, ANKRD33B, DAP, CTNND2
153	5	5p15.2	5p14.3	0.0820633	0.0795534	0.00250992	-0.0106657	0.0156855	0.736488	0.810445	NA	NA	CT49, DNAH5, TRIO, FAM105A, FAM105B, ANKH, MIR4637, U8.ENSG00000202269.1, FBXL7, MIR887, RNA5SP178, MARCH11, ZNF622, FAM134B, MYO10, RNA5SP179, BASP1, RNA5SP180, FTH1P10, RN7SKP133, SNORD81.ENSG00000212278.1, RN7SL58P, snoU13.ENSG00000238674.1, CDH18
154	5	5p14.3	11q13	0.0797186	0.0746685	0.00505011	-0.0078387	0.0179389	0.461742	0.557056	NA	NA	GUSBP1, CDH12, PMCHL1, RN7SL572P, PRDM9, C5orf17, SNORA40.ENSG00000252083.1, CDH10, SNORD29
155	5	5p14	5p14	0.0745604	0.0662945	0.00826589	-0.00407223	0.020604	0.199312	0.2709	NA	NA	CDH9
156	5	5p14	5p14	0.0717468	0.0645499	0.00719688	-0.0049658	0.0193596	0.258865	0.34298	NA	NA	SNORA18.ENSG00000252601.1, RN7SKP207
157	5	5p13.3	5q11	0.0837046	0.0750174	0.00868713	-0.00433597	0.0217102	0.20066	0.272029	NA	NA	CDH6, DROSHA, C5orf22, PDZD2, snoU13.ENSG00000238864.1, MIR4279, GOLPH3, MTMR12, ZFR, MIR579, SUB1, NPR3, TARS, ADAMTS12, RXFP3, AMACR, C1QTNF3, RAI14, SLC45A2, TTC23L, RAD1, BRIX1, DNAJC21, AGXT2, PRLR, U3.ENSG00000201368.1, SPEF2, IL7R, CAPSL, UGT3A1, UGT3A2, LMBRD2, MIR580, SKP2, NADK2, RANBP3L, RNA5SP181, SLC1A3, NIPBL, C5orf42, RN7SL37P, NUP155, WDR70, GDNF, EGFLAM, LIFR, MIR3650, OSMR, RICT…
158	5	5p12	5p12	0.124736	0.0966504	0.0280858	0.013119	0.0430527	0.000285095	0.000753568	0.399384	0.568724	HCN1
159	5	5q11.1	5q11.1	0.139977	0.105024	0.0349521	0.0193498	0.0505544	1.52298e-05	4.89672e-05	0.204371	0.476086	EMB, PARP8
160	5	5q11.1	5q11.1	0.229308	0.158758	0.0705505	0.051869	0.089232	3.89369e-13	6.20631e-12	0.0529873	0.344344	snoU13.ENSG00000238702.1, ISL1, RNA5SP182
161	5	5q11.2	5q13	0.26354	0.185625	0.0779159	0.0581966	0.0976352	2.71764e-14	5.49799e-13	0.0261224	0.275101	ITGA1, PELO, ITGA2, MOCS2, FST, NDUFS4, ARL15, MIR581, RN7SL801P, MIR4459, HSPB3, SNX18, ESM1, GZMK, GZMA, CDC20B, GPX8, MIR449A, MIR449B, MIR449C, MCIDAS, CCNO, DHX29, SKIV2L2, PPAP2A, MIR5687, SLC38A9, DDX4, RNA5SP183, IL31RA, IL6ST, snoU13.ENSG00000238326.1, ANKRD55, RNA5SP184, RNA5SP185, RNU6ATAC2P, MAP3K1, snoU13.ENSG00000238717.1, SETD9, MIER3, GPBP1, ACTBL2, snoU13.ENSG00000238899.1, PLK2,…
162	5	5q12	5q12	0.295662	0.213189	0.0824733	0.061874	0.103072	1.05119e-14	2.5133e-13	0.0630102	0.348106	PDE4D
163	5	5q12.1	5q12.1	0.272216	0.190509	0.0817063	0.0617895	0.101623	2.8007e-15	7.7535e-14	0.0196701	0.237842	MIR582
164	5	5q13.3	5q14.3	0.317233	0.233775	0.083458	0.0623054	0.104611	2.20104e-14	4.82395e-13	0.023695	0.266174	FKSG52, PART1, DEPDC1B, ELOVL7, ERCC8, NDUFAF2, SMIM15, ZSWIM6, C5orf64, RN7SKP157, KIF2A, DIMT1, IPO11, CKS1B.ENSG00000268942.1, LRRC70, HTR1A, RNF180, RGS7BP, RN7SL169P, FAM159B, SREK1IP1, CWC27, ADAMTS6, CENPK, PPWD1, TRIM23, TRAPPC13, SGTB, NLN, ERBB2IP, SNORA76.ENSG00000252904.1, SREK1, snoU13.ENSG00000238400.1, MAST4, CD180, PIK3R1, U8.ENSG00000212249.2, X7SK.ENSG00000249352.3, SLC30A5, RN7…
165	5	5q14	5q15	0.283705	0.2097	0.0740046	0.0535842	0.0944251	2.36031e-12	3.26717e-11	0.0454074	0.33195	NR2F1, FAM172A, MIR2277, POU5F2
166	5	5q15	5q33.1	0.339508	0.261689	0.0778189	0.0560576	0.0995801	3.62293e-12	4.76416e-11	0.207576	0.476086	KIAA0825, ANKRD32, MCTP1, FAM81B, TTC37, ARSK, GPR150, RFESD, SPATA9, RHOBTB3, GLRX, C5orf27, ELL2, MIR583, PCSK1, CAST, ERAP1, ERAP2, LNPEP, LIX1, RIOK2, RGMB, CHD1, FAM174A, RN7SKP62, ST8SIA4, MIR548P, RN7SL802P, RNA5SP188, SLCO4C1, RN7SKP68, SLCO6A1, LINC00492, LINC00491, PAM, GIN1, PPIP5K2, C5orf30, NUDT12, RN7SL255P, RNA5SP189, SNORA31.ENSG00000252337.1, EFNA5, RN7SL782P, RN7SKP122, FBXL17, …
167	5	5q31.1	5q31.1	0.279719	0.200628	0.0790906	0.0588884	0.0992928	4.18107e-14	7.85444e-13	0.0244951	0.266285	GRIA1, RN7SL177P, FAM114A2, MFAP3, GALNT10, MIR1294, RN7SL655P, SAP30L, HAND1, MIR3141, MIR1303, RN7SL439P, LARP1, FAXDC2, MIR378H, CNOT8, GEMIN5, MRPL22, KIF4B, RNA5SP199, SGCD, TIMD4, HAVCR1, HAVCR2, MED7, ITK, FAM71B, CYFIP2, FNDC9, ADAM19, NIPAL4, SOX30, C5orf52, THG1L, LSM11, CLINT1, EBF1, RNF145, SNORA68.ENSG00000252458.1, UBLCP1, IL12B, RNU4ATAC2P, ADRA1B, TTC1, PWWP2A, FABP6, CCNJL, RN7SL…
168	5	5q34	5q35.3	0.282063	0.207955	0.074108	0.0537373	0.0944786	1.96954e-12	2.79995e-11	0.0269664	0.275384	TENM2, SNORA40.ENSG00000253065.1, WWC1, RARS, FBLL1, PANK3, MIR103A1, SLIT3, MIR585, SPDL1, DOCK2, FAM196B, MIR378E, FOXI1, C5orf58, LCP2, KCNIP1, KCNMB1, MIR4454, GABRP, RANBP17, RN7SL623P, snoU13.ENSG00000252387.1, TLX3, RN7SL339P, SNORA70.ENSG00000206909.1, MIR3912, NPM1, FGF18, C5orf50, FBXW11, EFCAB9, STK10, UBTD2, SNORA57.ENSG00000212529.1, SH3PXD2B, NEURL1B, MIR5003, DUSP1, ERGIC1, RPL26L1…
169	6	6p25.3	6p25	0.172802	0.123866	0.0489359	0.032085	0.0657867	2.2376e-08	1.25211e-07	0.0072363	0.146883	DUSP22, EXOC2, HUS1B, IRF4, snoU13.ENSG00000238438.1, FOXQ1, FOXF2, RN7SL352P, FOXC1
170	6	6p25	6p25	0.187339	0.139567	0.0477715	0.0302146	0.0653283	1.47068e-07	6.7875e-07	0.034677	0.315841	GMDS
171	6	6p25.2	6p22.3	0.185932	0.143405	0.0425266	0.0248861	0.060167	3.04426e-06	1.12766e-05	0.0578243	0.344344	C6orf195, MYLK4, WRNIP1, SERPINB1, MIR4645, SERPINB9, SERPINB6, NQO2, RIPK1, RNA5SP201, BPHL, TUBB2A, TUBB2B, PSMG4, SLC22A23, PXDC1, FAM50B, C6ORF50, PRPF4B, FAM217A, snoU13.ENSG00000252668.1, C6orf201, ECI2, RNA5SP202, snoU13.ENSG00000238801.1, CDYL, RPP40, RMRPP2, PPP1R3G, LYRM4, MIR3691, FARS2, RN7SL221P, NRN1, F13A1, MIR5683, LY86, RN7SL554P, snoU13.ENSG00000251762.1, RREB1, SSR1, CAGE1, RIO…
172	6	6p22.3	6p21.2	0.168581	0.131891	0.0366903	0.0196742	0.0537065	2.95534e-05	8.86312e-05	0.0762608	0.367141	NRSN1, SNORD46.ENSG00000251830.1, DCDC2, KAAG1, MRS2, GPLD1, ALDH5A1, KIAA0319, TDP2, ACOT13, C6orf62, GMNN, FAM65B, RN7SL334P, CMAHP, RNY5P5, LRRC16A, snoU13.ENSG00000238322.1, HIST1H2AA, HIST1H2BA, SCGN, SLC17A4, SLC17A1, SLC17A3, SLC17A2, TRIM38, HIST1H1A, HIST1H3A, HIST1H4A, HIST1H4B, HIST1H2AB, HIST1H3B, HIST1H1C, HIST1H2BB, HIST1H3C, HFE, HIST1H4C, HIST1H1T, HIST1H2BC, HIST1H2AC, HIST1H1E, …
173	6	6p21	6p21	0.137632	0.117934	0.0196975	0.00371075	0.0356842	0.0167905	0.0305599	0.517792	0.666015	BTBD9, SNORD45.ENSG00000200706.1, GLO1, DNAH8, RN7SL465P, SNORA8.ENSG00000212586.1, GLP1R, SAYSD1, KCNK5, KCNK17, KCNK16, KIF6, DAAM2, MOCS1, TDRG1, LINC00951, LRFN2, OARD1, UNC5CL, TSPO2, APOBEC2, NFYA, ADCY10P1, TREML1, TREM2, TREML2, TREML3P, TREML4, RNA5SP207, TREM1, NCR2, FOXP4, MIR4641, MDFI, TFEB, PGC, FRS3, PRICKLE4, TOMM6, USP49, SNORA8.ENSG00000206977.1, MED20, BYSL, CCND3, TAF8, C6orf1…
174	6	6p12.3	6p12.3	0.13388	0.110258	0.0236222	0.00797045	0.039274	0.00342386	0.00729131	0.183138	0.470364	CLIC5, ENPP4, ENPP5, RCAN2, CYP39A1, SLC25A27, TDRD6, PLA2G7, ANKRD66, MEP1A, GPR116, GPR110, TNFRSF21, CD2AP, GPR111, GPR115, RN7SKP116, OPN5, PTCHD4
175	6	6p12.3	6p12	0.131536	0.113398	0.0181373	0.00242975	0.0338448	0.0251	0.0430052	0.33177	0.553498	MUT, CENPQ, GLYATL3, C6orf141, RHAG, CRISP2, CRISP3, PGK2, CRISP1, DEFB133, DEFB114, DEFB113, DEFB110, DEFB112, TFAP2D, TFAP2B
176	6	6p12	6p12	0.141852	0.12247	0.0193819	0.00316256	0.0356013	0.0203556	0.0360507	0.310688	0.536932	SNORD66.ENSG00000212532.1, PKHD1, RN7SL580P, MIR206, MIR133B, IL17A, IL17F, MCM3, PAQR8, EFHC1, TRAM2, TMEM14A, GSTA1, GSTA2, GSTA5, GSTA3, GSTA4, RN7SK, ICK, FBXO9, RN7SL244P, GCM1, U3.ENSG00000251930.1, ELOVL5, MIR5685, RN7SKP256, GCLC, KLHL31, LRRC1, MLIP, TINAG, FAM83B, HCRTR2, GFRAL, HMGCLL1, BMP5, COL21A1, DST, BEND6, KIAA1586, ZNF451, BAG2, RAB23, PRIM2, LINC00680, MIR548U
177	6	6q11.1	6q11.1	0.1517	0.131891	0.0198087	0.00310447	0.036513	0.0212631	0.0371574	0.112209	0.43465	MTRNR2L9
178	6	6q11.1	6q11.1	0.157796	0.142708	0.0150884	-0.00204612	0.0322229	0.0877131	0.132578	NA	NA	KHDRBS2
179	6	6q12	6q12	0.165299	0.148988	0.0163108	-0.00113367	0.0337553	0.0695418	0.107585	NA	NA	FKBP1C, LGSN, PTP4A1, PHF3
180	6	6q12	6q12	0.180305	0.16783	0.0124751	-0.00571399	0.0306641	0.184621	0.252235	NA	NA	EYS
181	6	6q12	6q12	0.199297	0.176204	0.0230928	0.00440845	0.0417772	0.0161159	0.0296398	0.236133	0.488202	SNORD65.ENSG00000212229.1, RNA5SP208
182	6	6q12	6q12	0.212192	0.190858	0.0213339	0.002133	0.0405348	0.0305072	0.0512676	0.452984	0.618038	BAI3
183	6	6q13	6q13	0.228605	0.209002	0.0196028	-0.000193232	0.0393989	0.0538821	0.0853675	0.444254	0.611076	LMBRD1, COL19A1, COL9A1, FAM135A, C6orf57, SMAP1, B3GAT2, U3.ENSG00000221345.1, OGFRL1, LINC00472, MIR30C2, MIR30A, RIMS1, KCNQ5, MIR4282, KHDC1L, KHDC1, DPPA5, KHDC3L, OOEP, DDX43, snoU13.ENSG00000238464.1, MB21D1, MTO1, EEF1A1, SLC17A5, CD109
184	6	6q12-q13	6q14.1	0.236108	0.217027	0.0190806	-0.000964832	0.0391261	0.0638952	0.0997296	0.389326	0.568724	COL12A1, COX7A2, TMEM30A, FILIP1, U3.ENSG00000221332.1, MIR4463, SENP6, RN7SKP163, MYO6, RNA5SP209, snoU13.ENSG00000239132.1, IMPG1, U6.ENSG00000272445.1, HTR1B, SNORD112.ENSG00000252932.1, IRAK1BP1, PHIP, HMGN3, LCA5, SH3BGRL2, ELOVL4, TTK, BCKDHB
185	6	6q14	6q14	0.268464	0.244243	0.0242214	0.00333111	0.0451117	0.0236795	0.0408374	0.462756	0.621309	FAM46A, RNA5SP210, SNORA70.ENSG00000206886.1, IBTK, TPBG, UBE3D, DOPEY1, PGM3, RWDD2A, ME1, PRSS35, SNAP91, RIPPLY2, CYB5R4, MRAP2, KIAA1009, TBX18, NT5E, SNX14, SYNCRIP, SNHG5, RN7SL643P, HTR1E, RN7SKP209, CGA, ZNF292, GJB7, SMIM8, C6orf163, C6orf164, C6ORF165, C6orf165, SLC35A1, RARS2, ORC3, AKIRIN2, snoU13.ENSG00000238628.1, RN7SL183P, SPACA1, CNR1, RNGTT, SNORA73.ENSG00000222145.1, PNRC1, RN7…
186	6	6q16.1	6q16.1	0.268933	0.248779	0.0201544	-0.000815307	0.0411241	0.0610861	0.0962014	0.668537	0.768833	MANEA, FUT9, RN7SL797P, UFL1, FHL5, GPR63, NDUFAF4, RN7SL509P, KLHL32, MMS22L, MIR2113, POU3F2, FBXL4, MIR548AI, FAXC, COQ3, PNISR, USP45, TSTD3, CCNC, PRDM13, MCHR2, SIM1, ASCC3, snoU13.ENSG00000238999.1
187	6	6q16.3	6q16.3	0.264947	0.242847	0.0221001	0.00126903	0.0429311	0.0385717	0.063601	0.607603	0.736554	GRIK2
188	6	6q16.3	6q16.3	0.273857	0.248081	0.025776	0.00476871	0.0467833	0.0166167	0.0303485	0.364545	0.565904	SNORA33.ENSG00000202283.1, HACE1, LINC00577, LIN28B, BVES, POPDC3, PREP, RN7SKP211, PRDM1, ATG5, RN7SL47P, RNA5SP211, AIM1, RTN4IP1, QRSL1, MIR587, C6orf203, BEND3, PDSS2, SOBP, SCML4, SEC63, SNORA73.ENSG00000253090.1, OSTM1, NR2E1, SNX3, snoU13.ENSG00000238974.1, RNA5SP212, LACE1, FOXO3, LINC00222, ZNF259P1, ARMC2, SESN1, CEP57L1, C6orf183, CCDC162P, snoU13.ENSG00000238474.1, CD164, PPIL6, SMPD2…
189	6	6q16.3	6q22	0.273154	0.243894	0.0292596	0.00832821	0.0501911	0.00634269	0.0128317	0.211391	0.476086	U3.ENSG00000253091.1, snoU13.ENSG00000238563.1, MARCKS, HDAC2, HS3ST5, RNA5SP213, FRK, NT5DC1, COL10A1, TSPYL4, DSE, TSPYL1, FAM26F, TRAPPC3L, FAM26E, FAM26D, RWDD1, RSPH4A, ZUFSP, KPNA5, FAM162B, GPRC6A, RFX6, RNA5SP214, VGLL2, ROS1, RN7SKP18, RN7SKP51, GOPC, DCBLD1, NUS1, SLC35F1, CEP85L, MCM9, PLN, ASF1A, FAM184A, MIR548B, MAN1A1
190	6	6q22	6q22.31	0.262837	0.234124	0.0287128	0.00805322	0.0493724	0.00667204	0.0132434	0.192161	0.476086	MIR3144, RNA5SP215, TBC1D32, SIGLECP3, GJA1, HSF2, SERINC1, PKIB, RN7SL564P, FABP7, SMPDL3A, CLVS2
191	6	6q22.31	6q24.3	0.30129	0.273552	0.0277376	0.00609253	0.0493826	0.0122849	0.022996	0.485839	0.639886	TRDN, NKAIN2, RNF217, TPD52L1, HDDC2, HEY2, NCOA7, RN7SKP56, HINT3, RNA5SP216, TRMT11, CENPW, MIR588, PRELID1P1, RSPO3, RNF146, ECHDC1, RNA5SP217, SOGA3, KIAA0408, C6orf58, THEMIS, PTPRK, snoU13.ENSG00000238938.1, LAMA2, ARHGAP18, TMEM244, L3MBTL3, SAMD3, TMEM200A, SMLR1, EPB41L2, AKAP7, ARG1, MED23, ENPP3, OR2A4, CTAGE9, MIR548H5, ENPP1, RN7SKP245, CTGF, MIR548AJ1, MOXD1, STX7, TAAR9, TAAR8, TAA…
192	6	6q24.3	6q26	0.297773	0.257502	0.0402708	0.0188934	0.0616482	0.000233123	0.000625626	0.206062	0.476086	SASH1, UST, TAB2, RN7SL234P, SUMO4, ZC3H12D, PPIL4, GINM1, SNORA2.ENSG00000202343.1, KATNA1, LATS1, NUP43, PCMT1, LRP11, RAET1E, RAET1G, ULBP2, ULBP1, RAET1K, RAET1L, ULBP3, PPP1R14C, snoU13.ENSG00000238594.1, IYD, PLEKHG1, MTHFD1L, AKAP12, RNY4P20, RN7SKP268, snoU13.ENSG00000238939.1, ZBTB2, RMND1, C6orf211, CCDC170, ESR1, SYNE1, RNA5SP223, MYCT1, VIP, FBXO5, MTRF1L, RGS17, RNA5SP224, RNA5SP225,…
193	6	6q25.2-q27	6q25.2-q27	0.306682	0.266923	0.0397598	0.0181658	0.0613537	0.000319975	0.000841535	0.196965	0.476086	PARK2
194	6	6q26	6q26	0.286049	0.24843	0.0376194	0.0164901	0.0587487	0.000506518	0.00128709	0.14626	0.45883	PACRG
195	6	6q26	6q27	0.289801	0.255059	0.0347414	0.0134723	0.0560105	0.00141651	0.00329684	0.156396	0.45883	snoU13.ENSG00000239136.1, CAHM, QKI, RN7SL366P, C6orf118, PDE10A, RNA5SP226, SDIM1, LINC00473, SNORD45.ENSG00000231297.2, T, PRR18, SFT2D1, MPC1, RPS6KA2, MIR1913, RNASET2, FGFR1OP, MIR3939, CCR6, TCP10L2, C6orf123, GPR31, MLLT4, TCP10, TTLL2, UNC93A, DACT2, FRMD1, KIF25, SMOC2, THBS2, WDR27, C6orf120, PHF10, TCTE3, C6orf70, LINC00242, LINC00574, DLL1, FAM120B, MIR4644, PSMB1, TBP, PDCD2
196	7	7p22.3	7p22.2	0.0546307	0.0446615	0.00996917	-0.000506151	0.0204445	0.067606	0.104899	NA	NA	FAM20C, PDGFA, PRKAR1B, HEATR2, SUN1, GET4, ADAP1, C7orf50, COX19, CYP2W1, GPER, GPR146, MIR339, ZFAND2A, UNCX, MICALL2, INTS1, MAFK, TMEM184A, PSMG3, ELFN1, MAD1L1, MIR4655, FTSJ2, NUDT1, SNX8, CHST12, EIF3B, GRIFIN, LFNG, MIR4648, BRAT1, snoU13.ENSG00000238857.1, IQCE, TTYH3, AMZ1, GNA12, CARD11, RN7SKP130, SDK1
197	7	7p22.1	7p22	0.049238	0.0366364	0.0126016	0.00285093	0.0223522	0.0131268	0.0243982	0.0820957	0.382025	FOXK1, snoU13.ENSG00000238781.1, AP5Z1, MIR4656, RADIL, PAPOLB, MMD2, RBAK, RNF216P1, ZNF890P, WIPI2, SLC29A4, TNRC18, FBXL18, snoU13.ENSG00000238394.1, MIR589, ACTB, FSCN1, RNF216, CCZ1, OCM, PMS2, RN7SL556P, RSPH10B, ZNF815P, AIMP2, SNORA42.ENSG00000207217.1, EIF2AK1, ANKRD61, RN7SL851P, USP42, CYTH3, FAM220A, RAC1, DAGLB, KDELR2, FLJ20306, GRID2IP, ZDHHC4, C7orf26, ZNF853, ZNF12, PMS2CL, RSPH1…
198	7	7p22	7p21.3	0.0490035	0.0380321	0.0109714	0.0011397	0.0208031	0.0321813	0.0537807	0.155354	0.45883	U3.ENSG00000212422.1, NDUFA4, PHF14, THSD7A, TMEM106B, VWDE, SCIN, ARL4A, SNORA64.ENSG00000199470.1, RN7SKP228, ETV1
199	7	7p21.2	7p21.2	0.0766706	0.059665	0.0170055	0.00492559	0.0290855	0.00662637	0.0132025	0.123246	0.446503	DGKB, AGMO, MEOX2, ISPD, SOSTDC1, LRRC72, ANKMY2, BZW2, TSPAN13, AGR2, AGR3, AHR, SNORA63.ENSG00000199473.1, SNX13, PRPS1L1, HDAC9, RN7SKP266, FERD3L, MIR3146, TMEM196, TWIST1, TWISTNB, MACC1, ITGB8, SNORD56.ENSG00000200753.1, ABCB5, SP8, RN7SL542P, SP4, MIR1183, DNAH11, CDCA7L, RAPGEF5, RNA5SP227, STEAP1B, IL6, TOMM7, SNORD93, FAM126A, KLHL7, NUPL2, GPNMB, MALSU1, IGF2BP3, SNORD65.ENSG0000021226…
200	7	7p21.2	7p11.2	0.0400938	0.0331472	0.00694654	-0.00215541	0.0160485	0.14596	0.207499	NA	NA	snoU13.ENSG00000238354.1, VSTM2A
201	7	7p11.2	7p11.2	0.0400938	0.0321005	0.0079933	-0.00103391	0.0170205	0.0906751	0.136272	NA	NA	SEC61G, SNORA73.ENSG00000252054.1, EGFR, LANCL2, VOPP1, FKBP9L, SEPT14, MRPS17, ZNF713, RN7SL64P, GBAS, PSPH, CCT6A, SNORA15.ENSG00000207168.1, SNORA22.ENSG00000206603.1, SUMF2, PHKG1, CHCHD2, snoU13.ENSG00000238673.1, NUPR1L
202	7	7p11.2	7p11.2	0.0377491	0.0327983	0.0049508	-0.00401479	0.0139164	0.298892	0.388191	NA	NA	RN7SL816P, ZNF479, MIR3147, ZNF716
203	7	7p11.2	7q11.21	0.0443142	0.0324494	0.0118648	0.00261612	0.0211134	0.0139489	0.0257442	0.0444653	0.33195	RN7SL855P, ZNF733P
204	7	7q11.21	7p11.2-q11.2	0.0565064	0.0422191	0.0142873	0.00388531	0.0246893	0.00829879	0.0162274	0.19997	0.476086	ZNF727, ZNF679, ZNF736, ZNF680, ZNF107, ZNF138, ZNF273, ZNF117, CCT6P3, INTS4L1, INTS4L2, SNORA15.ENSG00000207062.1, SNORA22.ENSG00000207344.1, SNORA63.ENSG00000200130.1, SNORA63.ENSG00000252102.1, ZNF92, CCT6P1, SNORA15.ENSG00000206785.1, SNORA22.ENSG00000206634.1, VKORC1L1, GUSB, ASL, CRCP, TPST1, LINC00174, snoU13.ENSG00000252265.1, KCTD7, RABGEF1, snoU13.ENSG00000238841.1, GTF2IRD1P1, TMEM248…
205	7	7p11.2-q11.2	7q11.22	0.055803	0.0411724	0.0146307	0.0043205	0.0249409	0.00641242	0.0129231	0.0718065	0.367141	RNA5SP231, RN7SL371P
206	7	7q11.22	7q11.22	0.066823	0.0516399	0.0151831	0.00385476	0.0265114	0.00983401	0.0188784	0.238789	0.489213	AUTS2
207	7	7q11.23	7q11.23-q21	0.066354	0.0544313	0.0119228	0.000460362	0.0233852	0.0451268	0.0734882	0.363379	0.565904	WBSCR17, RN7SKP75, CALN1, RNA5SP232, RN7SL377P, RN7SL625P, TYW1B, POM121, GTF2IRD2P1, NCF1B, NSUN5P2, NSUN5, STAG3L3, TRIM50, TRIM74, FKBP6, FZD9, BAZ1B, BCL7B, TBL2, MLXIPL, VPS37D, DNAJC30, WBSCR22, STX1A, MIR4284, ABHD11, LINC00035, RN7SL265P, CLDN3, CLDN4, WBSCR27, WBSCR28, ELN, LIMK1, EIF4H, MIR590, LAT2, RFC2, CLIP2, GTF2IRD1, RNA5SP233, GTF2I, STAG3L2, GTF2IRD2, NCF1, GATSL1, WBSCR16, GTF2…
208	7	7q21	7q21.11	0.0640094	0.0565248	0.00748461	-0.00400723	0.0189764	0.213389	0.285728	NA	NA	MAGI2, RPL13AP17, RNA5SP234, GNAI1, RN7SL869P, RN7SL35P, CD36, GNAT3, SEMA3C, HGF, CACNA2D1, MIR1255B1, PCLO, RNA5SP235, SEMA3E
209	7	7p12.1	7q21.11	0.0560375	0.0484997	0.00753786	-0.00321797	0.0182937	0.180564	0.247981	NA	NA	SEMA3A, SEMA3D, LINC00972
210	7	7q21.1-q21.2	7q21.1-q21.2	0.0787808	0.0694348	0.00934602	-0.00327338	0.0219654	0.15473	0.218986	NA	NA	GRM3, KIAA1324L, DMTF1, TMEM243, TP53TG1, CROT, ABCB4, ABCB1, snoU13.ENSG00000238587.1, RUNDC3B, SLC25A40, DBF4, ADAM22, SRI, STEAP4, SNORA67.ENSG00000207094.1, C7orf62, C7orf63, DPY19L2P4, STEAP1, STEAP2, ZNF804B, GTPBP10, CLDN12, CDK14, snoU13.ENSG00000238739.1, FZD1, MTERF, AKAP9, CYP51A1, LRRD1, KRIT1, ANKIB1, GATAD1, PEX1, RBM48, FAM133B, CDK6, RN7SL7P, SAMD9, SAMD9L, HEPACAM2, CCDC132, CALC…
211	7	7q31	7q31	0.0991794	0.0865318	0.0126476	-0.00129756	0.0265928	0.0797486	0.121588	NA	NA	IMMP2L
212	7	7q31.1	7q31.1	0.087456	0.0743196	0.0131364	3.48386e-05	0.026238	0.0528191	0.0841905	0.635956	0.749361	LRRN3, snoU13.ENSG00000238922.1
213	7	7q31.1	7q31	0.0872216	0.0715283	0.0156933	0.00272394	0.0286627	0.0193723	0.0347776	0.844383	0.889241	DOCK4, RNA5SP237, ZNF277, RN7SKP187, IFRD1, LSMEM1, TMEM168, C7orf60, GPR85, TSRM, PPP1R3A, FOXP2, RNA5SP238, MIR3666, MDFIC, SNORA25.ENSG00000202377.1, TFEC, TES, CAV2, snoZ185, CAV1, MET, CAPZA2, RNA5SP239, ST7, WNT2, ASZ1, CFTR, CTTNBP2, NAA38, ANKRD7
214	7	7q31	7q31.33	0.0935522	0.0732729	0.0202793	0.00704952	0.0335091	0.00306666	0.00661091	0.857614	0.900361	U1.ENSG00000271739.1, KCND2, TSPAN12, ING3, RNA5SP240, CPED1, RNA5SP241, WNT16, FAM3C, RN7SKP277, PTPRZ1, AASS, FEZF1, CADPS2, RNF133, RNF148, TAS2R16, SLC13A1, IQUB, NDUFA5, ASB15, LMOD2, WASL, HYAL4, SPAM1, TMEM229A, GPR37, POT1
215	7	7q31.3-q32.1	7q31.3-q32.1	0.124502	0.0956036	0.0288981	0.0139754	0.0438209	0.000182122	0.00050155	0.808089	0.859072	GRM8, MIR592, ZNF800, GCC1, ARF5, FSCN3, PAX4, SND1, LRRC4, MIR593, LEP, RBM28, PRRT4, IMPDH1, FAM71F1, FAM71F2, HILPDA, METTL2B, RNA5SP242, RNA5SP243, CALU, RN7SL81P, OPN1SW, CCDC136, FLNC, KCP, ATP6V1F, IRF5, TNPO3, RN7SL306P, snoU13.ENSG00000238733.1, TSPAN33, SMO, AHCYL2, STRIP2, SMKR1, NRF1, RNA5SP244, MIR182, MIR183, MIR96, UBE2H, ZC3HC1, RNA5SP245, KLHDC10, TMEM209, SSMEM1, CPA2, CPA4, sno…
216	7	7q35	7q35	0.114889	0.0826936	0.032195	0.0180013	0.0463886	1.26941e-05	4.14726e-05	0.318297	0.541748	CNTNAP2
217	7	7q35	7q36.1	0.118406	0.0858339	0.0325717	0.0181665	0.046977	1.3375e-05	4.34274e-05	0.246525	0.494517	MIR548F4, RNA5SP249, RN7SL456P, U3.ENSG00000199370.1, RN7SL72P, C7orf33, CUL1, EZH2, RN7SL569P, RNY5, RNY1, RNY3, RNY4, PDIA4, ZNF425, ZNF786, RN7SL521P, ZNF398, ZNF282, ZNF212, ZNF783, SNORD112.ENSG00000252557.1, ZNF777, ZNF746, ZNF767, KRBA1, ZNF467, SSPO, ATP6V0E2, ZNF862, ACTR3C, LRRC61, ZBED6CL, RARRES2, REPIN1, ZNF775, GIMAP8, GIMAP7, GIMAP4, GIMAP6, GIMAP2, GIMAP1, GIMAP5, TMEM176B, TMEM17…
218	7	7q36.2	7q36	0.115592	0.081298	0.0342941	0.0201392	0.0484489	3.23403e-06	1.18132e-05	0.171026	0.46908	DPP6, PAXIP1, HTR5A, RN7SKP280, INSIG1, BLACE, EN2, CNPY1, RBM33, SHH
219	7	7q36.3	7q36.3	0.118171	0.0858339	0.0323372	0.0179377	0.0467368	1.52673e-05	4.89672e-05	0.137186	0.457792	C7orf13, RNF32, LMBR1, NOM1, MNX1, UBE3C, RN7SL142P, DNAJB6, PTPRN2, MIR595, MIR5707, ESYT2, LINC00689, NCAPG2, VIPR2, WDR60
220	8	8p23.3	8p23.3	0.360375	0.283322	0.0770534	0.054858	0.0992489	1.36155e-11	1.46158e-10	0.11795	0.440546	ERICH1, FBXO25, OR4F21, RPL23AP53, TDRP, ZNF596, DLGAP2, CLN8, MIR596, ARHGEF10, KBTBD11, MYOM2
221	8	8p23.2	8p23.2	0.381946	0.30321	0.078736	0.0561777	0.101294	9.90999e-12	1.14035e-10	0.221614	0.476086	CSMD1
222	8	8p23.2	8p23.2	0.367644	0.285066	0.0825773	0.0603183	0.104836	5.1661e-13	7.99226e-12	0.145974	0.45883	RNA5SP251, RN7SL872P
223	8	8p23.2	8p23.1	0.365064	0.28716	0.0779047	0.0556325	0.100177	9.46727e-12	1.13177e-10	0.124544	0.446503	SNORA70.ENSG00000206661.1, RN7SL318P, RN7SKP159, MCPH1, ANGPT2, AGPAT5, MIR4659A, XKR5, DEFB1, DEFA6, DEFA4, ALG1L13P, DEFA1B, DEFA1, DEFA3, DEFA5, DEFB103A, DEFB103B, DEFB104A, DEFB104B, DEFB105A, DEFB105B, DEFB106A, DEFB106B, DEFB107A, DEFB107B, DEFB4A, DEFB4B, FAM66B, FAM66E, FAM85B, FAM86B3P, FAM90A24P, LRLE1, MIR548I3, SGK223, SPAG11A, SPAG11B, ZNF705B, ZNF705G, RN7SL178P, CLDN23, MFHAS1, SN…
224	8	8p23.1	8p22	0.357093	0.281926	0.0751666	0.0530088	0.0973244	3.8766e-11	3.84734e-10	0.160387	0.45883	MIR5692A2, LONRF1, LINC00681, KIAA1456, DLC1, RNA5SP255, C8orf48
225	8	8p22	8p22	0.385698	0.312282	0.0734156	0.050735	0.0960962	2.58022e-10	2.12062e-09	0.266597	0.501917	SGCZ, MIR383, TUSC3, MSR1, RN7SL474P, FGF20, MICU3, ZDHHC2, CNOT7, VPS37A, MTMR7, SLC7A2, PDGFRL, MTUS1, MIR548V, RNA5SP256, FGL1, PCM1, ASAH1, NAT1, NAT2, PSD3, SNORA62.ENSG00000201157.1, SH2D4A, CSGALNACT1, INTS10, LPL, SLC18A1, ATP6V1B2, LZTS1, U3.ENSG00000251944.1, GFRA2, DOK2, XPO7, NPM2, snoU13.ENSG00000238466.1, FGF17, DMTN, FAM160B2, NUDT18, HR, REEP4, LGI3, SFTPC, BMP1, PHYHIP, MIR320A, …
226	8	8p12	8p12	0.330832	0.266574	0.0642587	0.0424856	0.0860319	8.80906e-09	5.65069e-08	0.367702	0.565904	NRG1, RNA5SP262, RNA5SP263
227	8	8p12	8p12	0.318171	0.255059	0.0631118	0.0416053	0.0846183	1.09315e-08	6.70815e-08	0.216316	0.476086	FUT10, TTI2, MAK16, SNORD13, SNORA70.ENSG00000252505.1, RNF122, RN7SL621P, DUSP26, RN7SL457P
228	8	8p12	8p12	0.293787	0.23552	0.0582667	0.037282	0.0792515	6.50885e-08	3.29198e-07	0.228015	0.477273	UNC5D
229	8	8p12	8p12	0.279484	0.223657	0.0558275	0.0351862	0.0764688	1.42892e-07	6.7875e-07	0.184237	0.470364	RN7SKP201
230	8	8p12	8p11.23	0.264947	0.211445	0.0535027	0.0332387	0.0737668	2.84576e-07	1.21697e-06	0.183734	0.470364	RNA5SP264, KCNU1
231	8	8p11.23	8p11.2	0.23728	0.197837	0.0394435	0.0197684	0.0591186	9.46199e-05	0.00026615	0.535987	0.679051	ZNF703, ERLIN2, GPR124, PROSC, BRF2, RAB11FIP1, RN7SL709P, GOT1L1, ADRB3, EIF4EBP1, ASH2L, STAR, LSM1, BAG4, DDHD2, PPAPDC1B, WHSC1L1, LETM2, FGFR1, RPS20P22, C8orf86, TACC1, PLEKHA2, HTRA4, TM2D2, ADAM9, SNORD38.ENSG00000207199.1, ADAM32, ADAM5, ADAM3A, ADAM18, ADAM2, IDO1, IDO2, C8orf4
232	8	8p11.21	8p11.21	0.209144	0.181786	0.0273577	0.00840212	0.0463134	0.00493445	0.0102186	0.764479	0.836396	ZMAT4
233	8	8p11.21	8p11.21	0.195545	0.168528	0.0270176	0.00857362	0.0454615	0.00435126	0.00908238	0.868316	0.905299	SFRP1, MIR548AO, SNORD65.ENSG00000238936.1, GOLGA7, GINS4, AGPAT6, ANK1, MIR486, RN7SL149P, KAT6A, SNORD112.ENSG00000238966.1, AP3M2, PLAT, snoU13.ENSG00000238714.1, IKBKB, POLB, DKK4, VDAC3, SLC20A2, SMIM19, CHRNB3, CHRNA6, THAP1, RNF170, RN7SL806P, HOOK3, MIR4469
234	8	8p11	8p11	0.146307	0.127355	0.018952	0.00249055	0.0354134	0.0253971	0.0433202	0.980655	0.980655	FNTA, HGSNAT, POTEA, RN7SKP41, SGK196, U3.ENSG00000201329.1
235	8	8q11.1	8q11.1	0.091442	0.0861828	0.00525914	-0.00846349	0.0189818	0.470864	0.564179	NA	NA	LINC00293, RN7SKP32, SPIDR, CEBPD, PRKDC, MCM4, UBE2V2, EFCAB1, SNAI2, C8orf22, RN7SKP294
236	8	8q11-q12	8q21.13	0.0966002	0.0893231	0.00727714	-0.00671247	0.0212667	0.320919	0.410714	NA	NA	SNTG1, SNORA7.ENSG00000201316.1, PXDNL, PCMTD1, ST18, FAM150A, RB1CC1, NPBWR1, OPRK1, ATP6V1H, RGS20, TCEA1, LYPLA1, MRPL15, RNU6ATAC32P, RNU105C, RN7SL250P, SOX17, RP1, XKR4, TMEM68, RNA5SP265, TGS1, LYN, SNORA1.ENSG00000199405.1, RN7SL798P, RN7SL323P, RPS20, SNORD54, MOS, SNORA3.ENSG00000221093.1, PLAG1, CHCHD7, SDR16C5, SDR16C6P, PENK, LINC00968, IMPAD1, RNA5SP266, LINC00588, FAM110B, UBXN2B, …
237	8	8q21.2	8q21.2	0.0651817	0.0614096	0.00377208	-0.00801474	0.0155589	0.555072	0.637485	NA	NA	RALYL, snoU13.ENSG00000238566.1, LRRCC1, E2F5, C8orf59, CA13, CA1, CA3, CA2, REXO1L10P.ENSG00000255940.1, REXO1L10P.ENSG00000270416.1, REXO1L11P, REXO1L1, ATP6V0D2, PSKH2, SLC7A13, WWP1, RMDN1, CPNE3, CNGB3, CNBD1, DCAF4L2, MMP16, RNA5SP272
238	8	8q21	8q22	0.0611958	0.0568737	0.00432209	-0.007089	0.0157332	0.480422	0.57302	NA	NA	RIPK2, OSGIN2, NBN, DECR1, CALB1, LINC00534, RNA5SP273, TMEM64, NECAB1, TMEM55A, OTUD6B, LRRC69, RN7SL777P, MIR4661, SLC26A7, snoU13.ENSG00000239134.1, RN7SKP231, RUNX1T1
239	8	8q22.1	8q23.2	0.0618992	0.0662945	-0.00439531	-0.0163175	0.00752689	0.486518	0.578978	NA	NA	TRIQK, C8orf87, LINC00535, RNA5SP274, FAM92A1, RBM12B, TMEM67, PDP1, MIR378D2, CDH17, GEM, FSBP, RAD54B, KIAA1429, ESRP1, DPY19L4, INTS8, CCNE2, NDUFAF6, snoU13.ENSG00000238791.1, TP53INP1, MIR3150B, PLEKHF2, C8orf37, GDF6, MTERFD1, PTDSS1, UQCRB, SDC2, CPQ, TSPYL5, U3.ENSG00000207215.1, MTDH, LAPTM4B, MATN2, RPL30, SNORA72.ENSG00000207067.1, C8orf47, HRSP12, POP1, NIPAL2, STK3, KCNS2, RN7SKP85, …
240	8	8q23.3	8q23.3	0.0611958	0.0589672	0.00222858	-0.00929352	0.0137507	0.736209	0.810445	NA	NA	CSMD3, snoU13.ENSG00000238656.1, MIR2053, TRPS1, LINC00536, RNA5SP276, EIF3H, UTP23, RAD21, MIR3610, AARD, SLC30A8, RN7SL228P, RN7SL826P, SNORA31.ENSG00000252852.1, MED30, EXT1, SAMD12, TNFRSF11B, COLEC10, MAL2, SNORA32.ENSG00000206776.1, NOV, ENPP2, RN7SKP153, TAF2, DSCC1, RN7SL396P, DEPTOR, RNA5SP277, COL14A1, MRPL13, MTBP, SNTB1, HAS2, snoU13.ENSG00000238901.1, ZHX2, DERL1, RNY4P5, TBC1D31, FA…
241	8	8q24.21	8q24	0.0475967	0.0474529	0.000143821	-0.0100705	0.0103582	1	1	NA	NA	LINC00977, RN7SKP206, CCDC26, MIR3686, GSDMC, FAM49B, SNORA25.ENSG00000200075.1, MIR5194, ASAP1, SNORA12.ENSG00000212342.1, ADCY8
242	8	8q24	8q24.22	0.0520516	0.0547802	-0.0027286	-0.0136901	0.00823291	0.652887	0.734367	NA	NA	SNORA72.ENSG00000252158.1, EFR3A, OC90, HHLA1, KCNQ3, HPYR1, LRRC6, TMEM71, PHF20L1, TG, SLA, WISP1, NDRG1, ST3GAL1, SNORA40.ENSG00000212273.1, ZFAT, MIR30B, MIR30D
243	8	8q24.2	8q24.3	0.055803	0.0526867	0.00311638	-0.007869	0.0141018	0.606581	0.692108	NA	NA	KHDRBS3, FAM135B, COL22A1
244	8	8q24.3	8q24	0.0651817	0.0635031	0.00167857	-0.0102146	0.0135717	0.815185	0.87207	NA	NA	SNORA25.ENSG00000251744.1, KCNK9, TRAPPC9, C8orf17, CASC7, CHRAC1, AGO2, DENND3, MIR151A, PTK2, RNA5SP278, SLC45A4, GPR20, LINC00051, MROH5, PTP4A3, SNORD5.ENSG00000238854.1, TSNARE1, BAI1, ARC, JRK, PSCA, LY6K, THEM6, SLURP1, LYPD2, LY6D, LYNX1, GML, CYP11B1, CYP11B2, LY6E, C8orf31, LY6H, GPIHBP1, ZFP41, GLI4, ZNF696, TOP1MT, RHPN1, MAFA, ZC3H3, X7SK.ENSG00000254144.2, GSDMD, MROH6, EEF1D, NAPRT…
245	9	9p24.3	9p24.2	0.386635	0.310537	0.0760981	0.0534329	0.0987633	5.57907e-11	5.24034e-10	0.123519	0.446503	C9orf66, CBWD1, DOCK8, FAM138C, FOXD4, KANK1, RN7SL412P, DMRT1, DMRT2, DMRT3, RNA5SP279, SMARCA2, RN7SL592P, VLDLR, KCNV2, KIAA0020, CARM1P1, RFX3
246	9	9p24.2	9p24.1	0.38687	0.308793	0.0780771	0.0554308	0.100723	1.71898e-11	1.80837e-10	0.0827533	0.382025	GLIS3, SLC1A1, SPATA6L, PPAPDC2, CDC37L1, AK3, RCL1, JAK2, INSL4, INSL6, RLN2, RLN1, PLGRKT, CD274, PDCD1LG2, KIAA1432, ERMP1, KIAA2026, MLANA, snoU13.ENSG00000238654.1, MIR4665, RANBP6
247	9	9p24.1	9p24.1	0.383353	0.306001	0.0773515	0.0547537	0.0999493	2.40443e-11	2.43217e-10	0.0453205	0.33195	IL33, C9orf38, GLDC, KDM4C, RN7SL123P, RN7SL25P, TPD52L3, UHRF2, snoU13.ENSG00000252110.1, C9orf123
248	9	9p23-p24.3	9p23-p24.3	0.414068	0.333566	0.080502	0.0574841	0.10352	8.15502e-12	9.97568e-11	0.0745513	0.367141	PTPRD
249	9	9p23-p24.3	9p23-p24.3	0.383822	0.307746	0.0760758	0.0534556	0.098696	5.22571e-11	4.99768e-10	0.0613819	0.348106	SNORD27.ENSG00000251699.1
250	9	9p23	9p23	0.393669	0.314375	0.079294	0.0565547	0.102033	9.97266e-12	1.14035e-10	0.0582422	0.344344	RN7SL5P
251	9	9p23	9p23	0.390856	0.309839	0.0810163	0.0583401	0.103692	3.16668e-12	4.27095e-11	0.0316696	0.312831	TYRP1, RN7SL849P, LURAP1L, MPDZ
252	9	9p23	9p22.3	0.397655	0.311235	0.0864202	0.0636993	0.109141	1.20767e-13	2.04915e-12	0.016005	0.234509	LINC00583, NFIB, ZDHHC21, CER1, FREM1, TTC39B, RN7SL157P, SNAPC3, PSIP1, RN7SL98P
253	9	9p22.3	9p22.2	0.398124	0.319609	0.0785151	0.0557001	0.10133	1.80528e-11	1.86192e-10	0.116712	0.440546	CCDC171, C9orf92, BNC2
254	9	9p22.2	9p22	0.400938	0.317167	0.0837711	0.0609712	0.106571	7.5173e-13	1.12974e-11	0.0621755	0.348106	RN7SL720P, CNTLN, SH3GL2
255	9	9p21.3	9p22.1	0.408206	0.328681	0.0795252	0.0565767	0.102474	1.27394e-11	1.39603e-10	0.152432	0.45883	ADAMTSL1, MIR3152, RN7SKP258, FAM154A, RRAGA, HAUS6, SCARNA8, RN7SL158P, PLIN2, DENND4C, snoU13.ENSG00000238348.1, RPS6, ACER2, SLC24A2
256	9	9p22	9p22	0.410551	0.333566	0.0769851	0.0539793	0.0999908	6.02848e-11	5.56312e-10	0.187311	0.471074	MLLT3, MIR4473, MIR4474
257	9	9p21	9p21.3	0.437984	0.359735	0.0782488	0.0549261	0.101571	4.99787e-11	4.8683e-10	0.348983	0.565419	FOCAD, MIR491, SNORA30.ENSG00000202189.1, PTPLAD2, IFNB1, IFNW1, IFNA21, IFNA4, IFNA10, IFNA16, IFNA7, IFNA17, IFNA14, IFNA5, KLHL9, IFNA6, IFNA13, IFNA2, IFNA8, IFNA1, MIR31HG, IFNE, MIR31, SNORD39.ENSG00000264379.1, RN7SL151P
258	9	9p21	9p21	0.463775	0.374738	0.0890366	0.065549	0.112524	1.12044e-13	1.9645e-12	0.357073	0.565904	MTAP
259	9	9p21.3	9p21	0.477608	0.383461	0.0941472	0.070583	0.117711	4.93196e-15	1.2971e-13	0.343406	0.561786	C9orf53, CDKN2A, CDKN2B
260	9	9p21.3	9p21.3	0.438921	0.357292	0.0816291	0.0583242	0.104934	7.02998e-12	8.80422e-11	0.460022	0.621267	DMRTA1
261	9	9p21	9p21	0.41993	0.338451	0.0814789	0.0583945	0.104563	5.17867e-12	6.64385e-11	0.248966	0.495434	ELAVL2
262	9	9p21.3	9p21.3	0.407737	0.331124	0.0766139	0.0536425	0.0995853	7.01439e-11	6.36133e-10	0.218636	0.476086	IZUMO3, RMRPP5, RN7SKP120
263	9	9p21.2	9p21.2	0.398593	0.324145	0.0744481	0.0515831	0.097313	1.96697e-10	1.64227e-09	0.219876	0.476086	TUSC1
264	9	9p21.2	9p21.2	0.387573	0.316818	0.0707554	0.048016	0.0934948	1.1943e-09	8.97434e-09	0.224331	0.476086	SNORA31.ENSG00000252580.1, CAAP1, RN7SL100P, PLAA, IFT74, LRRC19
265	9	9p21	9p21.2	0.382649	0.314027	0.068623	0.045937	0.0913089	3.38138e-09	2.28026e-08	0.261076	0.500556	TEK, RNA5SP280, LINC00032, EQTN, MOB3B, IFNK, C9orf72
266	9	9p21.2	9p21.1	0.377491	0.310886	0.066605	0.0439793	0.0892307	8.74572e-09	5.65069e-08	0.505653	0.655404	LINGO2, MIR873, MIR876
267	9	9p21.1	9p21.1	0.354513	0.294836	0.0596775	0.0373681	0.0819869	1.72487e-07	7.75453e-07	0.579125	0.709692	snoU13.ENSG00000239155.1
268	9	9p21.1	9p21.1	0.329894	0.272156	0.0577382	0.0358915	0.0795849	2.49739e-07	1.08564e-06	0.435941	0.604576	RNA5SP281, ACO1, DDX58, TOPORS, NDUFB6, GVQW1
269	9	9p21.1	9p13.3	0.318875	0.266574	0.0523009	0.0306158	0.0739861	2.49483e-06	9.44087e-06	0.589372	0.719632	TAF1L, TMEM215, APTX, DNAJA1, SMU1, B4GALT1, RNU4ATAC15P, SPINK4, BAG1, CHMP5, NFX1, AQP7, AQP3, NOL6, ANKRD18B
270	9	9p21	9p13.3	0.30973	0.255408	0.0543221	0.032877	0.0757673	7.79244e-07	3.17738e-06	0.573966	0.705936	PTENP1, PRSS3, UBE2R2, RNU4ATAC11P, UBAP2, SNORD121B, SNORD121A, RN7SKP114, DCAF12, UBAP1, RNA5SP282, KIF24, NUDT2, KIAA1161, C9orf24, FAM219A, DNAI1, RN7SKP24, ENHO, CNTFR, RPP25L, DCTN3, ARID3C, GALT, SIGMAR1, IL11RA, CCL27, CCL19, CCL21, FAM205A, FAM205B, FAM205CP, KIAA1045, DNAJB5, C9orf131, FLJ00273, RN7SL338P, VCP, FANCG, PIGO, STOML2, FAM214B
271	9	9p13.3	9p13.1	0.313013	0.256106	0.0569068	0.0354246	0.0783891	2.40535e-07	1.06321e-06	0.37958	0.568527	UNC13B, ATP8B5P, RUSC2, FAM166B, CD72, MIR4667, TESK1, SIT1, ARHGEF39, CCDC107, RMRP, CA9, RN7SL22P, TPM2, TLN1, CREB3, GBA2, RGP1, MSMP, NPR2, SPAG8, FAM221B, HINT2, TMEM8B, OR13J1, HRCT1, LINC00961, OR2S2, RECK, GLIPR2, CCIN, CLTA, GNE, RNF38, MELK, MIR4475, PAX5, MIR4540, MIR4476, ZCCHC7, GRHPR, ZBTB5, RN7SL463P, POLR1E, FBXO10, TOMM5, FRMPD1, RN7SKP171, TRMT10B, EXOSC3, DCAF10, SLC25A51, SHB,…
272	9	9q13	9p13.1	0.31864	0.265178	0.0534621	0.0317993	0.075125	1.45769e-06	5.63783e-06	0.798499	0.854268	ANKRD20A1, ANKRD20A2, ANKRD20A3, ANKRD20A4, CBWD3, CBWD5, CBWD6, CBWD7, CNTNAP3B, CNTNAP3, FAM27A, FAM27B, FAM27C, FAM27D1, FAM27E1, FAM27E2, FAM27E3, FAM74A1, FAM74A2, FAM74A3, FAM74A4, FAM74A5, FAM74A6, FAM95B1, FOXD4L2, FOXD4L3, FOXD4L4, FOXD4L5, FOXD4L6, MIR1299, MIR4477A, PGM5P2, PGM5, RN7SL343P, RN7SL422P, RN7SL462P, RN7SL544P, RN7SL565P, RN7SL640P, RN7SL722P, RN7SL763P, RN7SL787P, RNA5SP28…
273	9	9q21.11	9q21.11	0.316061	0.274948	0.0411133	0.0193297	0.0628969	0.000224492	0.000608675	0.661037	0.768171	TMEM252, PIP5K1B, FAM122A, PRKACG, FXN, TJP2, FAM189A2, APBA1, PTAR1, C9orf135, RN7SL570P, MAMDC2, SMC5, KLF9, TRPM3, MIR204, TMEM2, ABHD17B, C9orf85, C9orf57, GDA, RNA5SP285, ZFAND5, TMC1, snoU13.ENSG00000238402.1, ALDH1A1, ANXA1, RNA5SP286, RORB, TRPM6, RN7SKP47, RNY4P1, C9orf40, C9orf41, NMRK1, OSTF1, snoU13.ENSG00000238598.1, PCSK5, RFK, GCNT1, PRUNE2, PCA3, FOXB2, VPS13A, GNA14, GNAQ, RN7SKP…
274	9	9q34.13	9q34.3	0.251348	0.220167	0.0311807	0.0108986	0.0514628	0.00270419	0.00590209	0.803538	0.856937	MED27, NTNG2, SETX, TTF1, C9orf171, BARHL1, DDX31, GTF3C4, AK8, C9orf9, TSC1, GFI1B, MIR548AW, GTF3C5, CELP, CEL, RALGDS, snoU13.ENSG00000238657.1, GBGT1, OBP2B, ABO, SURF6, MED22, RPL7A, SNORD24, SNORD36A, SNORD36B, SNORD36C, SURF1, SURF2, SURF4, C9orf96, REXO4, ADAMTS13, CACFD1, SLC2A6, TMEM8C, ADAMTSL2, FAM163B, DBH, SARDH, VAV2, LINC00094, BRD3, WDR5, RNU6ATAC, RXRA, MIR4669, COL5A1, MIR3689A…
275	9	9q34.3	9q34.3	0.245955	0.21598	0.029975	0.00983361	0.0501164	0.00369415	0.00777249	0.928257	0.942237	NACC2, C9orf69, CARD9, DKFZP434A062, DNLZ, GPSM1, LHX3, QSOX2, SNAPC4, SDCCAG3, PMPCA, INPP5E, SEC16A, C9orf163, NOTCH1, MIR4673, MIR4674, U3.ENSG00000252440.1, AGPAT2, EGFL7, MIR126, FAM69B, SNHG7, LCN10, LCN6, LCN8, LCN15, TMEM141, KIAA1984, RABL6, C9orf172, EDF1, MAMDC4, MIR4292, PHPT1, MIR4479, TRAF2, C8G, FBXW5, LCN12, C9orf141, LCNL1, PTGDS, C9orf142, CLIC3, ABCA2, C9orf139, FUT7, NPDC1, EN…
276	10	10p15.3	10p15	0.269402	0.251221	0.0181809	-0.00283305	0.0391948	0.0921504	0.138094	NA	NA	DIP2C, RNA5SP297, RNA5SP298, TUBB8, ZMYND11, RN7SL754P, MIR5699, PRR26, LARP4B, GTPBP4, ADARB2, IDI1, IDI2, LINC00200, WDR37, LINC00700, LINC00701, PFKP, PITRM1, KLF6, LINC00702, LINC00703, LINC00704, LINC00705, AKR1E2, AKR1C1, U8.ENSG00000238840.1, AKR1C2, U8.ENSG00000239148.1, AKR1C3, U8.ENSG00000251740.1, U8.ENSG00000239142.1, AKR1CL1, AKR1C4, U8.ENSG00000251909.1, AKR1C7P, UCN3, TUBAL3, NET1,…
277	10	10p15.1	10p14	0.260492	0.239358	0.0211344	0.000408927	0.0418599	0.0468574	0.0760709	0.488088	0.640022	ANKRD16, FBXO18, IL15RA, IL2RA, SNORA14, RBM17, PFKFB3, RN7SKP78, MIR3155A, DKFZP667F0711, PRKCQ, LINC00707, SFMBT2, ITIH5, ITIH2, KIN, ATP5C1, TAF3, GATA3, LINC00708, RNA5SP299, LINC00709
278	10	10p14	10p14	0.291911	0.26448	0.0274308	0.0059988	0.0488628	0.0124166	0.02316	0.321242	0.542713	SFTA1P, LINC00710, CELF2, USP6NL, ECHDC3, PROSER2, UPF2, DHTKD1, MIR548AK, SEC61A2, U6.ENSG00000272507.1, snoU13.ENSG00000238900.1, NUDT5, CDC123, RN7SL232P, RN7SL198P, CAMK1D, SNORD45.ENSG00000252438.1, RNU6ATAC39P, MIR4480, MIR548Q, CCDC3, RNA5SP300, OPTN, MCM10, UCMA, PHYH, SEPHS1, BEND7, PRPF18, FRMD4A, RNA5SP301, MIR4293, MIR1265, FAM107B, RNA5SP302, CDNF, HSPA14, SUV39H2, DCLRE1C, MEIG1, OL…
279	10	10p11.21	10p11.21	0.251114	0.227146	0.0239679	0.0035595	0.0443762	0.0219988	0.0383157	0.789247	0.847058	PARD3
280	10	10p11.21	10p11.1	0.244314	0.226099	0.0182151	-0.00209718	0.0385274	0.0809743	0.1231	NA	NA	CUL2, MIR3611, CREM, CCNY, GJD4, FZD8, MIR4683, SNORA40.ENSG00000237002.2, NAMPTL, ANKRD30A, RN7SL314P, MTRNR2L7, ZNF248, ZNF25, ZNF33A, ZNF37A, HSD17B7P2, SEPT7P9
281	10	10q11.21	10q11.21	0.251583	0.236567	0.015016	-0.00556516	0.0355972	0.15667	0.220934	NA	NA	CCNYL2
282	10	10q11.21	10q11.23	0.279719	0.254013	0.0257061	0.00454689	0.0468653	0.0177038	0.032111	0.343067	0.561786	LINC00839, ZNF37BP, ZNF33B, BMS1, snoU13.ENSG00000238732.1, MIR5100, RET, CSGALNACT2, RASGEF1A, RNU6ATAC11P, FXYD4, HNRNPF, U3.ENSG00000221400.1, ZNF487, ZNF239, ZNF485, ZNF32, LINC00619, LINC00840, LINC00841, CXCL12, TMEM72, RASSF4, C10orf10, C10orf25, CEP164P1, ZNF22, RSU1P2, OR13A1, ALOX5, MARCH8, ZFAND4, AGAP10, AGAP4, AGAP9, ANTXRLP1, ANTXRL, ANXA8L1, ANXA8L2, ANXA8, ASAH2C, BMS1P1, BMS1P2, …
283	10	10q11.23	10q11.23	0.281829	0.252268	0.0295609	0.00840938	0.0507124	0.00633908	0.0128317	0.308826	0.536465	PARG, AGAP7, AGAP8, FAM21D, FAM25D, MSMB, RNA5SP316, SNORA74.ENSG00000223182.1, TIMM23B, NCOA4, AGAP6, ASAH2, FAM21A, LINC00843, RMRPP4, RNA5SP317, SGMS1, SNORA74.ENSG00000223111.1, TIMM23, ASAH2B, A1CF
284	10	10q11.2	10q11.2	0.295428	0.265527	0.029901	0.00842258	0.0513795	0.00652336	0.0130799	0.25089	0.495434	PRKG1
285	10	10q21.1	10q21.1	0.288159	0.260293	0.0278663	0.00653121	0.0492015	0.0107356	0.0202398	0.277271	0.516245	MIR605, CSTF2T, DKK1, MBL2, RNA5SP318
286	10	10q21.1	10q21.1	0.292849	0.26134	0.0315089	0.0101159	0.052902	0.00400264	0.008388	0.223145	0.476086	PCDH15
287	10	10q21.1	10q21.3	0.309027	0.274599	0.0344282	0.0127049	0.0561516	0.00194487	0.00442858	0.160648	0.45883	MIR548F1, snoU13.ENSG00000238355.1, MTRNR2L5, ZWINT, SNORD2.ENSG00000238707.1, MIR3924, IPMK, snoU13.ENSG00000238970.1, CISD1, UBE2D1, TFAM, BICC1, RN7SKP196, LINC00844, PHYHIPL, FAM13C, SLC16A9, LINC00948, CCDC6, C10orf40, ANK3, CDK1, RHOBTB1, LINC00845, TMEM26, C10orf107, ARID5B, RTKN2, RN7SL591P, ZNF365, ADO, EGR2, NRBF2, JMJD1C, MIR1296, REEP3
288	10	10q22.2	10q22.2	0.32286	0.284717	0.0381431	0.0161747	0.0601115	0.00068393	0.00169692	0.173991	0.46908	CTNNA3, snoR442.ENSG00000252203.1, snoU13.ENSG00000239000.1, LRRTM3, DNAJC12, RN7SL394P, SIRT1, HERC4, RN7SL220P, MYPN, RN7SKP202, ATOH7, PBLD, HNRNPH3, RUFY2, DNA2, RNA5SP319, LINC00849, SLC25A16, TET1, snoU13.ENSG00000251926.1, CCAR1, SNORD98, STOX1, DDX50, DDX21, RN7SL373P, KIAA1279, SRGN, VPS26A, SUPV3L1, HKDC1, HK1, TACR2, TSPAN15, NEUROG3, C10orf35, COL13A1, H2AFY2, AIFM2, TYSND1, SAR1A, PP…
289	10	10q22.3	10q22.3	0.313013	0.27425	0.0387631	0.017013	0.0605131	0.00049334	0.00125969	0.0890708	0.394958	C10orf11
290	10	10q22.3	10q23.1	0.314654	0.278786	0.0358684	0.0140423	0.0576945	0.00131122	0.00307903	0.147675	0.45883	RN7SL518P, SNORA31.ENSG00000252888.1, KCNMA1, RNA5SP321, DLG5, RN7SL284P, POLR3A, RPS24, LINC00856, LINC00595, SNORA71.ENSG00000201393.1, ZMIZ1, PPIF, ZCCHC24, ANXA11, EIF5AL1, LINC00857, MBL1P, NUTM2B, NUTM2E, PLAC9, SFTPA1, SFTPA2, SFTPD, TMEM254, MAT1A, DYDC1, DYDC2, FAM213A, TSPAN14, SH2D4B
291	10	10q22-q23	10q22-q23	0.32075	0.284368	0.0363818	0.0144337	0.0583299	0.00118673	0.00283737	0.140338	0.45883	NRG3
292	10	10q23.1	10q26.3	0.39789	0.353105	0.0447844	0.0216465	0.0679223	0.000147455	0.000408217	0.328879	0.551405	GHITM, C10orf99, CDHR1, LRIT2, LRIT1, RGR, LINC00858, CCSER2, RN7SKP84, GRID1, RN7SKP238, RNA5SP322, MIR346, WAPAL, OPN4, LDB3, U3.ENSG00000252189.1, BMPR1A, MMRN2, SNCG, ADIRF, AGAP11, FAM25A, GLUD1, FAM35A, LINC00863, LINC00864, NUTM2A, NUTM2D, RN7SL733P, MINPP1, PAPSS2, ATAD1, CFL1P1, RN7SL78P, KLLN, PTEN, SNORD74.ENSG00000200891.1, RNLS, LIPJ, LIPF, LIPK, LIPN, LIPM, ANKRD22, STAMBPL1, ACTA2,…
293	11	11p15.5	11p15	0.249238	0.205513	0.0437251	0.0237513	0.0636989	2.02362e-05	6.29837e-05	0.68897	0.778917	ANO9, ATHL1, B4GALNT4, BET1L, IFITM1, IFITM2, IFITM3, IFITM5, NLRP6, ODF3, PKP3, PSMD13, PTDSS2, RIC8A, RN7SL838P, SCGB1C1, SIGIRR, SIRT3, RNH1, HRAS, LRRC56, C11orf35, RASSF7, MIR210HG, MIR210, PHRF1, CDHR5, IRF7, SCT, DRD4, DEAF1, EPS8L2, TMEM80, TALDO1, PDDC1, CEND1, SLC25A22, PIDD, RPLP2, SNORA52
294	11	11p15.5	11p15.2	0.275498	0.22575	0.0497481	0.0291081	0.0703881	2.66904e-06	9.95683e-06	0.455375	0.618795	PNPLA2, CD151, EFCAB4A, POLR2L, TSPAN4, CHID1, AP2A2, MUC6, MUC2, MUC5AC, MUC5B, TOLLIP, BRSK2, MOB2, DUSP8, CTSD, FAM99A, FAM99B, IFITM10, LSP1.ENSG00000130592.9, MIR4298, SYT8, TNNI2, C11orf89, TNNT3, MRPL23, H19, IGF2, MIR483, INS, MIR4686, TH, ASCL2, C11orf21, TSPAN32, RPL26P30, CD81, TRPM5, TSSC4, KCNQ1, KCNQ1OT1, KCNQ1DN, CDKN1C, SLC22A18AS, SLC22A18, PHLDA2, NAP1L4, SNORA54, CARS, OSBPL5, …
295	11	11p15.3	11p15.3	0.230481	0.185973	0.0445072	0.0251719	0.0638425	7.66709e-06	2.60186e-05	0.170839	0.46908	SOX6
296	11	11p15.1	11p15.1	0.217351	0.176204	0.0411468	0.0222063	0.0600872	2.41834e-05	7.39563e-05	0.352994	0.565904	RN7SL188P
297	11	11p15.1	11p15.1	0.228839	0.184578	0.0442616	0.0249782	0.0635449	8.14692e-06	2.72948e-05	0.1617	0.45883	C11orf58
298	11	11p15.1	11p14.2	0.231184	0.18388	0.0473041	0.0280063	0.0666019	1.9288e-06	7.35182e-06	0.221904	0.476086	PLEKHA7, RN7SKP90, OR7E14P, RPS13, SNORD14A, SNORD14B, PIK3C2A, NUCB2, NCR3LG1, KCNJ11, ABCC8, USH1C, OTOG, MYOD1, KCNC1, SERGEF, TPH1, SAAL1, SAA3P, MRGPRX3, MRGPRX4, SAA4, SAA2, RNA5SP333, RNA5SP334, SAA1, HPS5, GTF2H1, MIR3159, LDHA, LDHC, LDHAL6A, TSG101, UEVLD, SPTY2D1, TMEM86A, IGSF22, PTPN5, MRGPRX1, MRGPRX2, ZDHHC13, CSRP3, E2F8, NAV2, RNA5SP335, MIR4486, SNORA1.ENSG00000207407.1, MIR4694…
299	11	11p14.3	11p14.3	0.21102	0.170621	0.0403989	0.0216781	0.0591196	2.7544e-05	8.32651e-05	0.394634	0.568724	LUZP2
300	11	11p14.2	11p14.2	0.206565	0.17097	0.0355951	0.0169295	0.0542607	0.000208063	0.000567053	0.561462	0.698201	ANO3, MUC15, SLC5A12, FIBIN, BBOX1, CCDC34, LGR4, LIN7C, RNA5SP339, LINC00678, BDNF, KIF18A, MIR610, METTL15, RN7SKP158
301	11	11p14.1	11p14.1	0.207737	0.172366	0.0353717	0.0166559	0.0540875	0.000236557	0.000631619	0.376844	0.568009	RN7SL240P, KCNA4, FSHB, ARL14EP, MPPED2, DCDC1, DNAJC24, IMMP1L, ELP4, PAX6, RCN1, U3.ENSG00000212551.1, WT1, EIF3M, CCDC73, PRRG4, QSER1, DEPDC7, TCP11L1, CSTF3, HIPK3, KIAA1549L, C11orf91, CD59, FBXO3, LMO2, CAPRIN1, NAT10, ABTB2, CAT, ELF5, EHF, APIP, PDHX, MIR1343, CD44, SLC1A2, PAMR1, FJX1, TRIM44, LDLRAD3, MIR3973, COMMD9, LINC00610, PRR5L, TRAF6, RAG1, RAG2, C11orf74, SNORA31.ENSG000002518…
302	11	11p12	11p12	0.194607	0.162945	0.0316624	0.0133711	0.0499537	0.00075989	0.00187654	0.472577	0.631978	LRRC4C
303	11	11p12	11p11.2	0.188511	0.157362	0.031149	0.0130946	0.0492034	0.000794204	0.00195211	0.625408	0.745908	HNRNPKP3, API5, TTC17, RN7SKP287, HSD17B12, MIR670, ALKBH3, C11orf96, ACCSL, ACCS, EXT2, ALX4, CD82, TSPAN18, TP53I11, PRDM11, SYT13, CHST1, SLC35C1, CRY2, MAPK8IP1, C11orf94, PEX16, GYLTL1B, PHF21A, CREB3L1, DGKZ, CHRM4, MDK, MIR4688, AMBRA1, HARBI1, ATG13, ARHGAP1, ZNF408, F2, CKAP5, MIR5582, SNORD67.ENSG00000252427.1, SNORD67.ENSG00000212135.1, LRP4
304	11	11p11.2	11p11.2	0.18007	0.150384	0.0296865	0.0119524	0.0474206	0.00113744	0.00273193	0.686399	0.778843	C11orf49, ARFGAP2, PACSIN3, RN7SL772P, DDB2, ACP2, NR1H3, MADD, MYBPC3, SPI1, MIR4487, SLC39A13, PSMC3, RAPSN, CELF1, RN7SL652P, NDUFS3, PTPMT1, KBTBD4, C1QTNF4, FAM180B, MTCH2
305	11	11p11.2	11p11.2	0.17585	0.147941	0.0279086	0.010311	0.0455061	0.00204799	0.00458401	0.861742	0.901885	AGBL2, FNBP4, snoU13.ENSG00000252447.1, NUP160, RNA5SP340, PTPRJ, MIR3161, OR4B1, OR4X2, OR4X1, OR4S1, OR4C3
306	11	11p11.2	11p11.2	0.170223	0.145499	0.0247238	0.0072896	0.042158	0.00582972	0.0119728	0.901225	0.925954	OR4A47, OR4C5, TRIM49B, TRIM64C, FOLH1
307	11	11p11.12	11p11.12	0.163423	0.140963	0.0224602	0.00527335	0.039647	0.0110809	0.0208163	0.913333	0.934158	OR4C13, OR4C12
308	11	11q11	11q11	0.152872	0.130495	0.0223768	0.00569216	0.0390613	0.00917984	0.0178837	0.927326	0.942237	OR10AG1, OR4A15, OR4A16, OR4A5, OR4C11, OR4C15, OR4C16, OR4C46, OR4C6, OR4P4, OR4S2, OR5AS1, OR5D13, OR5D14, OR5D16, OR5D18, OR5F1, OR5I1, OR5J2, OR5L1, OR5L2, OR5T2, OR5W2, OR8H2, OR8H3, OR8I2, OR8J3, OR8K5, TRIM48, TRIM51HP, TRIM51
309	11	11q12.1	11q13	0.168347	0.143754	0.0245926	0.00723972	0.0419456	0.00586653	0.0119728	0.610923	0.737925	OR5T3, OR5T1, OR8H1, OR8K3, OR8K1, OR8J1, OR8U1, OR5R1, OR5M9, OR5M3, OR5M8, OR5M11, OR5M10, OR5M1, OR5AP2, OR5AR1, OR9G1, OR9G4, OR5G5P, OR5AK2, LRRC55, APLNR, TNKS1BP1, SSRP1, snoU13.ENSG00000238692.1, P2RX3, PRG3, PRG2, SLC43A3, RNA5SP341, RN7SKP259, RTN4RL2, SLC43A1, TIMM10, SMTNL1, UBE2L6, SERPING1, MIR130A, YPEL4, CLP1, ZDHHC5, MED19, TMX2, BTBD18, C11orf31, CTNND1, OR9Q1, OR6Q1, OR9I1, OR9…
310	11	11q13.1	11q13.1	0.145604	0.1291	0.016504	2.71844e-06	0.0330052	0.0523287	0.0836624	0.368933	0.565904	CDC42BPG, AP5B1, ARL2, ATG2A, BATF2, C11orf85, CAPN1, CCDC85B, CDC42EP2, CDCA5, CFL1, CTSW, DPF2, EFEMP2, EHBP1L1, EHD1, FAM89B, FAU, FIBP, FOSL1, FRMD8, GPHA2, KAT5, KCNK7, LTBP3, MALAT1, MAP3K11, MIR192, MIR4489, MIR4690, MRPL49, MUS81, NAALADL1, NEAT1, OVOL1, PCNXL3, POLA2, PPP2R5B, RELA, RN7SL114P, RN7SL309P, RNASEH2C, SAC3D1, SCYL1, SIPA1, SLC22A20, SLC25A45, SNX15, SNX32, SPDYC, SSSCA1, SYV…
311	11	11q13.2	11q13.4	0.138101	0.118632	0.0194686	0.00344938	0.0354878	0.0183379	0.0330333	0.286829	0.51901	ACY3, ALDH3B2, C11orf72, DOC2GP, FAM86C2P, GSTP1, NDUFV1, NUDT8, RN7SL59P, TBX10, UNC93B1, ALDH3B1, NDUFS8, MIR4691, TCIRG1, CHKA, SUV420H1, C11orf24, LRP5
312	11	11q13	11q13.2-q13.3	0.137866	0.117585	0.0202809	0.00430065	0.0362611	0.0137722	0.0255077	0.265568	0.501917	PPP6R3, GAL, MTL5
313	11	11q13.2	11q13.2	0.130598	0.115841	0.014757	-0.00101204	0.030526	0.0698384	0.107727	NA	NA	CPT1A, MRPL21, IGHMBP2, MRGPRD, MRGPRF, TPCN2, MIR3164
314	11	11q13	11q13.2	0.129191	0.114794	0.014397	-0.00130678	0.0301007	0.0758038	0.116247	NA	NA	MYEOV, CCND1, ORAOV1, FGF19, FGF4, FGF3, ANO1, FADD, PPFIA1, MIR548K, CTTN, SHANK2
315	11	11q13.2	11q13.2	0.141383	0.120028	0.0213554	0.00522364	0.0374872	0.0101758	0.0192535	0.242187	0.489213	MIR3664
316	11	11q13.4	11q13.4	0.148652	0.125611	0.0230412	0.00658779	0.0394946	0.00653996	0.0130799	0.337426	0.559019	DHCR7, NADSYN1, UNC93B6
317	11	11q13.4	11q13.4	0.155451	0.127704	0.0277472	0.0110983	0.0443961	0.00121691	0.00289636	0.288693	0.51901	ENPP7P8, FAM86C1, ZNF705E, DEFB108B, RNA5SP342
318	11	11q13.4	11q13.4	0.161547	0.130844	0.0307031	0.0138455	0.0475607	0.000409511	0.0010611	0.290717	0.51901	RNF121, IL18BP, NUMA1, MIR3165, LRTOMT, LAMTOR1, snoU13.ENSG00000238768.1, ANAPC15, FOLR3, FOLR1, FOLR2, INPPL1, PHOX2A, CLPB
319	11	11q13.4	11q13.4	0.167644	0.136776	0.0308676	0.0137255	0.0480097	0.000472792	0.00121906	0.433694	0.603946	PDE2A, MIR139, ARAP1, STARD10, MIR4692, ATG16L2, FCHSD2, P2RY2, P2RY6, ARHGEF17, RELT, FAM168A, PLEKHB1, RAB6A, MRPL48, RN7SKP243, COA4, PAAF1, DNAJB13, UCP2, UCP3, C2CD3, PPME1, RNA5SP343, P4HA3, SNORA7.ENSG00000206913.1
320	11	11q13.4	11q13.5	0.173036	0.136427	0.0366093	0.0193825	0.0538361	3.80475e-05	0.000112432	0.285108	0.51901	PGM2L1, MIR548AL, KCNE3, LIPT2, POLD3, RN7SKP297, CHRDL2, SNORD43.ENSG00000212277.1, MIR4696, RNF169, XRRA1, RN7SL239P, SPCS2, NEU3, OR2AT4, SLCO2B1, TPBGL, ARRB1, MIR326, RPS3, SNORD15A, SNORD15B, KLHL35, GDPD5, SERPINH1, MAP6
321	11	11q13.5	11q13.5	0.173036	0.134334	0.0387028	0.0215365	0.0558691	1.26596e-05	4.14726e-05	0.261924	0.500556	MOGAT2, RN7SL786P, DGAT2, UVRAG, RNA5SP344, WNT11, PRKRIR, C11orf30
322	11	11q13.5-q14	11q14.1	0.172802	0.135729	0.0370726	0.01987	0.0542752	2.96561e-05	8.86312e-05	0.322085	0.542713	LRRC32, GUCY2EP, TSKU, ACER3, B3GNT6, CAPN5, OMP, MYO7A, GDPD4, PAK1, DKFZP434E1119, CLNS1A, AQP11
323	11	11q14.1	11q14.1	0.176319	0.135729	0.0405896	0.0233262	0.0578531	5.34111e-06	1.86055e-05	0.229932	0.478316	RSF1, AAMDC, INTS4, KCTD14, THRSP, NDUFC2, ALG8, KCTD21, USP35, GAB2, NARS2
324	11	11q14.1	11q14.1	0.182649	0.139218	0.043431	0.0259613	0.0609008	1.51258e-06	5.80743e-06	0.20145	0.476086	TENM4
325	11	11q14.1	11q14.1	0.179132	0.137474	0.0416586	0.0242973	0.05902	3.42018e-06	1.2407e-05	0.242429	0.489213	MIR708, MIR5579
326	11	11q14.1	11q14.1	0.188511	0.140614	0.047897	0.0302919	0.0655021	1.47106e-07	6.7875e-07	0.0799374	0.379421	MIR4300
327	11	11q14.1	11q14.1	0.192028	0.147244	0.0447846	0.0269417	0.0626275	1.1816e-06	4.67308e-06	0.155516	0.45883	SNORD112.ENSG00000252592.1, FAM181B, PRCP, snoU13.ENSG00000238995.1, C11orf82, RAB30, SNORA70E, PCF11, ANKRD42, CCDC90B
328	11	11q14.1	11q14.1	0.207034	0.155618	0.0514164	0.033125	0.0697079	5.45935e-08	2.84863e-07	0.0888822	0.394958	DLG2
329	11	11q14.1	11q14.2	0.204924	0.152128	0.0527954	0.0346253	0.0709655	1.98355e-08	1.13407e-07	0.0688414	0.367141	TMEM126B, TMEM126A, CREBZF, CCDC89, SYTL2, CCDC83, PICALM, snoU13.ENSG00000238666.1, EED, C11orf73, RN7SL225P, CCDC81, ME3, PRSS23, FZD4, TMEM135
330	11	11q14	11q14	0.214771	0.160154	0.0546179	0.0361003	0.0731354	1.18931e-08	7.10881e-08	0.0337204	0.31566	RAB38, MIR3166, CTSC, GRM5, TYR, NOX4, FOLH1B, TRIM49C, TRIM49D1, TRIM49, TRIM64B, TRIM77, SNORD56.ENSG00000207299.1, NAALAD2, CHORDC1, DISC1FP1, MIR4490, MIR1261
331	11	11q14.3	11q14.3	0.223916	0.168179	0.0557369	0.0368972	0.0745766	1.04852e-08	6.56571e-08	0.0579403	0.344344	FAT3, snoU13.ENSG00000239086.1, MTNR1B, CCDC67, SLC36A4, SMCO4, RN7SL223P, KIAA1731, SCARNA9, SNORA25.ENSG00000207112.1, TAF1D, SNORA1.ENSG00000206834.1, SNORA32.ENSG00000206799.1, SNORA8.ENSG00000207304.1, SNORD6, MIR1304, SNORA18.ENSG00000207145.1, SNORD5.ENSG00000239195.1, SNORA40.ENSG00000210825.1, C11orf54, MED17, RN7SL195P, snoU13.ENSG00000238437.1, VSTM5, HEPHL1, PANX1, FOLR4, GPR83, MRE11…
332	11	11q22.1	11q22.1	0.223447	0.172017	0.0514299	0.0325052	0.0703546	1.39537e-07	6.73362e-07	0.0750353	0.367141	CNTN5
333	11	11q22.1	11q22.1	0.217819	0.167132	0.0506876	0.031956	0.0694192	1.59286e-07	7.28562e-07	0.102252	0.428721	RN7SKP53
334	11	11q22.1	11q22.1	0.22415	0.174808	0.049342	0.0303424	0.0683415	4.73806e-07	1.97795e-06	0.16202	0.45883	RN7SL222P, ARHGAP42, RN7SKP115, snoU13.ENSG00000238388.1, TMEM133, PGR, TRPC6, MIR3920, ANGPTL5, KIAA1377, C11orf70, snoU13.ENSG00000252679.1, snoU13.ENSG00000239154.1, YAP1, BIRC2, BIRC3, TMEM123, MMP7, MMP20, MMP27, MMP8, WTAPP1, MMP10, MMP1, MMP3, MMP12, MMP13, DCUN1D5, DYNC2H1, MIR4693, PDGFD, DDI1, RNA5SP348
335	11	11q22.3	11q24.3	0.283001	0.218074	0.0649272	0.0443546	0.0854998	9.08587e-10	7.02819e-09	0.0917547	0.396427	CASP12, CASP4, CASP5, CASP1, CARD16, CARD17, CARD18, GRIA4, MSANTD4, KBTBD3, AASDHPPT, GUCY1A2, CWF19L2, ALKBH8, ELMOD1, SLN, SLC35F2, CUL5, RAB39A, ACAT1, NPAT, ATM, C11orf65, KDELC2, EXPH5, DDX10, RNA5SP349, SNORD39.ENSG00000264997.1, C11orf87, ZC3H12C, RDX, FDX1, ARHGAP20, RNA5SP350, C11orf53, C11orf92, C11orf93, MIR4491, POU2AF1, BTG4, C11orf88, MIR34B, MIR34C, LAYN, SIK2, RN7SKP273, PPP2R1B,…
336	11	11q25	11q25	0.25721	0.184927	0.0722831	0.0526495	0.0919167	1.22384e-12	1.78817e-11	0.0033038	0.0960229	SNX19, RN7SL167P, NTM, RNU6ATAC12P
337	11	11q25	11q25	0.257444	0.188067	0.0693773	0.049673	0.0890817	1.0368e-11	1.16033e-10	0.0079367	0.146883	OPCML, snoU13.ENSG00000238693.1, SPATA19, MIR4697, IGSF9B, JAM3, NCAPD3, VPS26B, THYN1, ACAD8, B3GAT1, GLB1L2, GLB1L3
338	12	12p13.33	12p13.3	0.104338	0.114794	-0.0104565	-0.0255932	0.00468016	0.176078	0.245018	NA	NA	B4GALNT3, CCDC77, FAM138D, IQSEC3, KDM5A, NINJ2, RNU4ATAC16P, SLC6A12, SLC6A13, WNK1, RAD52, ERC1, RN7SL852P, ADIPOR2, FBXL14, LINC00942, MIR3649, WNT5B
339	12	12p13.33	12p13.2	0.120516	0.133985	-0.0134688	-0.0296032	0.00266558	0.100094	0.148727	NA	NA	CACNA2D4, LRTM2, LINC00940, DCP1B, CACNA1C, CBX3P4, FKBP4, ITFG2, NRIP2, FOXM1, RHNO1, TULP3, TEAD4, TSPAN9, PRMT8, EFCAB4B, PARP11, CCND2, C12orf5, FGF23, FGF6, C12orf4, RAD51AP1, DYRK4, NDUFA9, AKAP3, GALNT8, KCNA6, KCNA1, KCNA5, NTF3, ANO2, VWF, RN7SL69P, CD9, PLEKHG6, TNFRSF1A, RN7SL391P, SCNN1A, LTBR, CD27, TAPBPL, VAMP1, MRPL51, NCAPD2, SCARNA10, GAPDH, IFFO1, NOP2, CHD4, SCARNA11.ENSG00000…
340	12	12p13	12p13.2	0.120281	0.126657	-0.006376	-0.0222744	0.00952241	0.442847	0.536723	NA	NA	ETV6, BCL2L14, LRP6
341	12	12p13.2	12p12.3	0.125909	0.133287	-0.00737825	-0.0236063	0.00884976	0.381216	0.478567	NA	NA	MANSC1, LOH12CR2, LOH12CR1, DUSP16, CREBL2, GPR19, CDKN1B, APOLD1, MIR613, DDX47, GPRC5A, GPRC5D, GSG1, HEBP1, HTR7P1, KIAA1467, MIR614, SNORD88, EMP1, C12orf36, RNA5SP353, GRIN2B, RN7SKP162, RN7SL46P, RN7SL676P, RPL30P11, ATF7IP, PLBD1, RN7SKP134, GUCY2C, H2AFJ, HIST4H4, WBP11, C12orf60, SMCO3, ART4, MGP, ERP27, ARHGDIB, PDE6H, RERG, PTPRO, EPS8, STRAP, DERA, SLC15A5, MGST1, LMO3
342	12	12p12.3	12p12.3	0.108324	0.11619	-0.00786625	-0.0231459	0.00741339	0.31905	0.409318	NA	NA	RERGL, PIK3C2G, PLCZ1, CAPZA3
343	12	12p12	12p12.3	0.1034	0.113398	-0.0099987	-0.025064	0.00506662	0.194318	0.264796	NA	NA	PLEKHA5, RN7SL459P, RN7SL67P, AEBP2
344	12	12p12	12p12.1	0.101524	0.114445	-0.0129212	-0.0279777	0.00213533	0.0903518	0.136175	NA	NA	PDE3A, SLCO1C1, SLCO1B3, LST3, SLCO1B7, SLCO1B1, SLCO1A2, IAPP, PYROXD1, RECQL, GOLT1B, C12orf39, GYS2, LDHB, KCNJ8, ABCC9, CMAS, ST8SIA1, C2CD5, ETNK1
345	12	12p12.1	12p12.1	0.0987104	0.108863	-0.0101521	-0.0249407	0.00463655	0.178854	0.247791	NA	NA	SOX5, MIR920, LINC00477, RN7SL38P, BCAT1, C12orf77, LRMP, CASC1, LYRM5, KRAS, IFLTD1, RN7SKP262, RASSF8, BHLHE41, SSPN, ITPR2, RNA5SP354, ASUN, FGFR1OP2, TM7SF3, MED21, C12orf71, STK38L, ARNTL2, SMCO2, PPFIBP1, REP15, MRPS35, MANSC4, KLHL42, RN7SKP15, PTHLH, CCDC91, RNA5SP355
346	12	12p11.22	12p11.22	0.090973	0.0987439	-0.00777086	-0.0219826	0.00644088	0.288875	0.377639	NA	NA	FAR2, ERGIC2, OVCH1, TMTC1, U3.ENSG00000253052.1
347	12	12p11.22	12p11.21	0.087925	0.0949058	-0.00698082	-0.0209607	0.00699901	0.334944	0.426587	NA	NA	RNA5SP356, IPO8, CAPRIN2, LINC00941, TSPAN11
348	12	12p11	12p11	0.0905041	0.0928123	-0.00230818	-0.0162745	0.0116581	0.772075	0.833905	NA	NA	DDX11, SNORA75.ENSG00000212533.1, FAM60A, snoU13.ENSG00000238661.1, DENND5B, snoU13.ENSG00000239033.1, METTL20, AMN1, STMN1P1, H3F3C, SNORA25.ENSG00000252204.1, KIAA1551, BICD1, FGD4, DNM1L, YARS2, PKP2, SNORD112.ENSG00000251863.1
349	12	12q12	12p11.1	0.103165	0.105722	-0.00255696	-0.017342	0.0122281	0.758855	0.824707	NA	NA	ALG10B, ALG10, CPNE8, RNA5SP358, RNA5SP359, SYT10
350	12	12q12	12q12	0.106448	0.107118	-0.000670103	-0.015586	0.0142458	0.95953	0.983846	NA	NA	KIF21A, ABCD2, C12orf40, SLC2A13, SNORA22.ENSG00000199571.1
351	12	12q12	12q12	0.110199	0.112352	-0.00215241	-0.0173434	0.0130386	0.806319	0.865559	NA	NA	LRRK2, MUC19
352	12	12q11-q12	12q11-q12	0.109965	0.113747	-0.00378255	-0.0190166	0.0114515	0.646081	0.729268	NA	NA	CNTN1
353	12	12q12	12q12	0.110668	0.113747	-0.00307915	-0.0183297	0.0121714	0.714306	0.791	NA	NA	PDZRN4, RNA5SP360
354	12	12q12	12q12	0.119343	0.118981	0.000362335	-0.0152645	0.0159891	0.992798	1	NA	NA	GXYLT1, YAF2, PPHLN1, RN7SL10P, ZCRB1, SNORA74.ENSG00000252917.1, PRICKLE1, ADAMTS20, PUS7L, IRAK4, TWF1, TMEM117
355	12	12q12	12q12	0.116295	0.118981	-0.00268573	-0.018244	0.0128725	0.758122	0.824707	NA	NA	NELL2, DBX2, RNA5SP361, PLEKHA8P1, ANO6
356	12	12q12	12q13.3	0.133177	0.124215	0.00896209	-0.00713429	0.0250585	0.285117	0.373994	NA	NA	ARID2, RN7SL246P, SCAF11, SLC38A1, SLC38A2, SLC38A4, AMIGO2, PCED1B, MIR4698, SNORA64.ENSG00000199566.1, MIR4494, RPAP3, ENDOU, RAPGEF3, SLC48A1, HDAC7, VDR, TMEM106C, COL2A1, SENP1, PFKM, ASB8, C12orf68, DKFZP779L1853, OR10AD1, H1FNT, ZNF641, ANP32D, C12orf54, OR8S1, LALBA, KANSL2, SNORA34, SNORA2A, SNORA2B, CCNT1, LINC00935, ADCY6, MIR4701, CACNB3, DDX23, RND1, ARF3, CCDC65, FKBP11, snoU13.ENSG…
357	12	12q13.3	12q14.1	0.1034	0.0969993	0.00640046	-0.00806529	0.0208662	0.400923	0.496202	NA	NA	RDH16, GPR182, HBCBP, ZBTB39, TAC3, MYO1A, TMEM194A, NAB2, STAT6, LRP1, MIR1228, NXPH4, SHMT2, NDUFA4L2, STAC3, R3HDM2, INHBC, INHBE, GLI1, ARHGAP9, MARS, RN7SL312P, DDIT3, MBD6, MIR616, DCTN2, KIF5A, PIP4K2C, DTX3, ARHGEF25, B4GALNT1, SLC26A10, snoU13.ENSG00000238436.1, OS9, AGAP2, TSPAN31, CDK4, MARCH9, CYP27B1, METTL1, METTL21B, TSFM, AVIL, CTDSP2, MIR26A2
358	12	12q14.1	12q14.1	0.100821	0.0952547	0.00556592	-0.00876737	0.0198992	0.463855	0.558324	NA	NA	XRCC6BP1, RN7SKP65
359	12	12q14.1	12q14.1	0.106448	0.0997906	0.00665718	-0.00798994	0.0213043	0.387489	0.481842	NA	NA	LRIG3
360	12	12q13	12q13	0.108792	0.101186	0.00760617	-0.00715032	0.0223627	0.324706	0.414552	NA	NA	SLC16A7
361	12	12q13	12q13	0.109027	0.102233	0.00679389	-0.00800688	0.0215947	0.382431	0.478949	NA	NA	SNORA19.ENSG00000251822.1
362	12	12q14.1	12q14.1	0.108089	0.106071	0.00201792	-0.0128999	0.0169358	0.817358	0.87207	NA	NA	FAM19A2
363	12	12q14.1	12q14.1	0.110434	0.10642	0.00401367	-0.010973	0.0190004	0.620719	0.70518	NA	NA	SNORD112.ENSG00000252883.1, USP15, MON2, C12orf61, MIRLET7I
364	12	12q14.1	12q14-q15	0.10762	0.106769	0.000851148	-0.0140806	0.0157828	0.940336	0.973055	NA	NA	PPM1H, snoU13.ENSG00000238475.1, LDHAL6CP, AVPR1A
365	12	12q14.2	12q14.2	0.10551	0.105024	0.000485541	-0.0143317	0.0153028	0.979141	0.996186	NA	NA	DPY19L2, TMEM5
366	12	12q14.2	12q14.2	0.105275	0.104327	0.000948911	-0.0138371	0.0157349	0.92924	0.965349	NA	NA	SRGAP1, C12orf66
367	12	12q14.2	12q14.2	0.107151	0.103978	0.00317356	-0.0116455	0.0179926	0.69817	0.7764	NA	NA	RPS11P6, C12orf56, snoU13.ENSG00000238440.1, XPOT, TBK1, SNORD83
368	12	12q14.2	12q14.2	0.10551	0.104676	0.000834459	-0.01397	0.015639	0.941607	0.973055	NA	NA	RASSF3, MIR548C, GNS, snoU13.ENSG00000238592.1, TBC1D30, RNU6ATAC42P
369	12	12q14.3	12q14.3	0.103869	0.103978	-0.000108971	-0.0146648	0.0144469	1	1	NA	NA	WIF1, LEMD3, MSRB3
370	12	12q14.3	12q15	0.102696	0.103629	-0.000932385	-0.0156291	0.0137643	0.930479	0.965349	NA	NA	RPSAP52, HMGA2
371	12	12q15	12q15	0.103165	0.107118	-0.00395264	-0.0187884	0.0108832	0.620637	0.70518	NA	NA	RNA5SP362, LLPH, TMBIM4, IRAK3, RN7SKP166, HELB, snoU13.ENSG00000238528.1
372	12	12q14.3	12q14.3	0.104572	0.107816	-0.00324367	-0.0181391	0.0116517	0.6912	0.771914	NA	NA	GRIP1
373	12	12q14	12q14	0.101524	0.10642	-0.00489606	-0.019666	0.00987387	0.53142	0.617058	NA	NA	CAND1
374	12	12q15	12q15	0.100821	0.104676	-0.00385487	-0.0185434	0.0108337	0.6265	0.710213	NA	NA	DYRK2
375	12	12q14	12q15	0.101055	0.105722	-0.00466716	-0.0194	0.0100656	0.55107	0.634273	NA	NA	IFNG, IL26, IL22, MDM1
376	12	12q14	12q14	0.098007	0.102931	-0.00492388	-0.0194769	0.00962916	0.522619	0.610883	NA	NA	RAP1B, SNORA70G
377	12	12q15	12q14.3	0.0928488	0.0987439	-0.00589512	-0.0201563	0.00836605	0.429296	0.523921	NA	NA	NUP107, SLC35E3, MDM2, CPM
378	12	12q15	12q15	0.0958968	0.10014	-0.00424273	-0.0186366	0.0101512	0.5815	0.666381	NA	NA	CPSF6, LYZ, YEATS4, RN7SL804P, FRS2, CCT2, LRRC10, BEST3, RAB3IP, MYRFL
379	12	12q15	12q15	0.0968347	0.100488	-0.00365378	-0.0180851	0.0107775	0.640114	0.724086	NA	NA	CNOT2, KCNMB4, PTPRB, PTPRR
380	12	12q14.1-q21.1	12q22-q23	0.101758	0.103629	-0.00187025	-0.0165436	0.0128031	0.829402	0.879567	NA	NA	TSPAN8, LGR5
381	12	12q21.1	12q21.1	0.103634	0.105373	-0.00173911	-0.016523	0.0130448	0.844583	0.890342	NA	NA	ZFC3H1, SNORA17.ENSG00000212461.1, THAP2, TMEM19, RAB21, TBC1D15
382	12	12q21.1	12q15-q21	0.106682	0.107467	-0.000784555	-0.0157187	0.0141496	0.947367	0.977088	NA	NA	TPH2, TRHDE
383	12	12q15-q21	12q15-q21	0.113716	0.111654	0.00206242	-0.0131866	0.0173115	0.816797	0.87207	NA	NA	U8.ENSG00000201809.1
384	12	12q21	12q21	0.118171	0.112003	0.00616837	-0.00919541	0.0215321	0.44685	0.540328	NA	NA	ATXN7L3B
385	12	12q14.1	12q14.1	0.128957	0.123866	0.00509061	-0.0109056	0.0210868	0.550587	0.634273	NA	NA	KCNC2, CAPS2, GLIPR1L1, GLIPR1L2, GLIPR1, KRR1, SNORA70.ENSG00000251893.2, RN7SL734P, PHLDA1, NAP1L1, RN7SKP172, BBS10, OSBPL8, ZDHHC17, CSRP2, E2F7, snoU13.ENSG00000238769.1
386	12	12q14.3	12q14.3	0.124736	0.117934	0.00680182	-0.00890956	0.0225132	0.410205	0.504223	NA	NA	NAV3
387	12	12cen-q21	12cen-q21	0.130129	0.121424	0.00870537	-0.00723699	0.0246477	0.294884	0.383933	NA	NA	SYT1, MIR1252, RN7SL696P, PAWR, PPP1R12A, RNA5SP363
388	12	12q21.31	12q21.31	0.132943	0.12596	0.00698303	-0.00916384	0.0231299	0.410281	0.504223	NA	NA	OTOGL, RN7SKP261, PTPRQ, MYF6, MYF5, LIN7A, MIR617, ACSS3, MIR618, MIR4699, PPFIA2, CCDC59, METTL25, TMTC2
389	12	12q21.31	12q21	0.129894	0.123866	0.00602847	-0.00998765	0.0220446	0.476349	0.569453	NA	NA	SNORA3.ENSG00000221148.1, SLC6A15, TSPAN19, LRRIQ1, ALX1, RASSF9, NTS
390	12	12q21	12q21	0.128488	0.125611	0.00287708	-0.0131649	0.0189191	0.748126	0.8203	NA	NA	MGAT4C
391	12	12q21.32	12q23.1	0.138335	0.13538	0.00295497	-0.0135926	0.0195025	0.748563	0.8203	NA	NA	MKRN9P, C12orf50, C12orf29, CEP290, RNA5SP364, TMTC3, KITLG, DUSP6, POC1B, GALNT4, ATP2B1, LINC00936, RNA5SP365, CCER1, LINC00615, EPYC, KERA, LUM, DCN, C12orf79, BTG1, CLLU1OS, CLLU1, snoU13.ENSG00000238865.1, C12orf74, PLEKHG7, EEA1, SNORD74.ENSG00000201502.1, snoU13.ENSG00000238361.1, snoU13.ENSG00000239073.1, NUDT4, UBE2N, MRPL42, RN7SL737P, SOCS2, CRADD, RN7SL630P, RN7SKP263, PLXNC1, CCDC41,…
392	12	12q23.1|12q21	12q23	0.127315	0.124215	0.00310042	-0.012872	0.0190728	0.726084	0.802353	NA	NA	RMST, MIR1251, MIR135A2, MIR4495, MIR4303, SLC9A7P1, TMPO, RN7SL179P, SLC25A3, SNORA53, IKBIP, APAF1
393	12	12q23.1	12q23.1	0.135756	0.130147	0.00560961	-0.0107262	0.0219455	0.517408	0.606791	NA	NA	ANKS1B
394	12	12q23.1	12q24.32	0.173036	0.158758	0.0142785	-0.00356011	0.0321171	0.120783	0.175018	NA	NA	RNA5SP366, FAM71C, UHRF1BP1L, GOLGA2B, RN7SL176P, ACTR6, DEPDC4, SCYL2, SLC17A8, snoU13.ENSG00000238748.1, NR1H4, GAS2L3, ANO4, SLC5A8, UTP20, snoU13.ENSG00000238800.1, ARL1, RNA5SP367, SPIC, MYBPC1, CHPT1, SYCP3, GNPTAB, RNA5SP368, snoU13.ENSG00000238940.1, RNA5SP369, DRAM1, CCDC53, NUP37, PARPBP, PMCH, RN7SL793P, IGF1, LINC00485, PAH, ASCL1, C12orf42, STAB2, U8.ENSG00000212594.1, snoU13.ENSG000…
395	12	12q24.32	12q24.33	0.152169	0.135031	0.0171374	0.000330505	0.0339443	0.0477904	0.0771097	0.627732	0.745908	LINC00507, LINC00508, MIR4419B, MIR3612, TMEM132C, snoU13.ENSG00000238895.1, SLC15A4, GLT1D1, TMEM132D, FZD10, PIWIL1, RIMBP2, RN7SL534P, STX2, snoU13.ENSG00000238822.1, RAN, GPR133, RNA5SP376, RNA5SP377, SFSWAP, RNA5SP378, MMP17, ULK1, PUS1, EP400, SNORA49, EP400NL, DDX51, GALNT9, NOC4L, MUC8, FBRSL1, ANHX, ANKLE2, CHFR, GOLGA3, LRCOL1, P2RX2, PGAM5, POLE, PXMP2, RNA5SP379, RNU4ATAC12P, ZNF10, Z…
396	13	13q11	13q12.3	0.310903	0.245987	0.0649153	0.0436099	0.0862206	3.06252e-09	2.09206e-08	0.0324898	0.312831	LINC00349, LINC00387, LINC00388, PHF2P2, LINC00442, RNA5SP24, TUBA3C, LINC00421, TPTE2, LINC00350, MPHOSPH8, PSPC1, RN7SL166P, ZMYM5, snoU13.ENSG00000238665.1, ZMYM2, GJA3, LINC00556, GJB2, CRYL1, GJB6, MIR4499, IFT88, IL17D, N6AMT2, XPO4, HNRNPA1P30, LATS2, snoU13.ENSG00000238893.1, RN7SL80P, SAP18, SNORD27.ENSG00000252128.1, SKA3, MRP63, ESRRAP2, MIPEPP3, RNA5SP25, ZDHHC20, MICU2, snoU13.ENSG00…
397	13	13q12.3	13q12.3	0.307386	0.252268	0.0551177	0.0337408	0.0764947	4.97672e-07	2.06122e-06	0.109919	0.43073	MTUS2, SLC7A1, UBL3, LINC00297, LINC00572, LINC00544, LINC00365, KATNAL1, LINC00427, LINC00426, HMGB1, USPL1, ALOX5AP, LINC00398, LINC00545, MEDAG, TEX26, HSPH1, B3GALTL, RXFP2, EEF1DP3, FRY, ZAR1L, BRCA2, N4BP2L1, SNORA16.ENSG00000212293.1, N4BP2L2, PDS5B, RNY1P4, LINC00423, KL, STARD13, RFC3, SNORA25.ENSG00000199196.1, LINC00457, NBEA, MAB21L1, LINC00445, DCLK1, SOHLH2, CCDC169, SPG20, SPG20OS,…
398	13	13q13.3	13q14.2	0.323329	0.275994	0.047335	0.025482	0.0691881	2.30514e-05	7.09068e-05	0.347841	0.565419	POSTN, TRPC4, RNA5SP26, LINC00571, UFM1, LINC00366, FREM2, STOML3, PROSER1, NHLRC3, LHFP, snoU13.ENSG00000238408.1, COG6, MIR4305, RNY4P14, SNORD116.ENSG00000212553.1, LINC00332, RNY3P9, RN7SKP2, LINC00598, FOXO1, MIR320D1, MRPS31, SLC25A15, MIR621, TPTE2P5, SUGT1P3, ELF1, WBP4, MIR3168, RN7SL597P, KBTBD6, snoU13.ENSG00000238651.1, KBTBD7, MTRF1, NAA16, RGCC, VWA8, MIR5006, RN7SL515P, DGKH, AKAP1…
399	13	13q14.2	13q14.2	0.334818	0.291696	0.0431225	0.0209784	0.0652667	0.000139284	0.000387638	0.223696	0.476086	LINC00444, LINC00562, SUCLA2, NUDT15, MED4, ITM2B, LINC00441, RB1, LPAR6, RCBTB2, LINC00462, CYSLTR2, FNDC3A, RNY3P2, MLNR, CDADC1, CAB39L, SETDB2, PHF11, RCBTB1, ARL11, EBPL, KPNA3, RNY4P30, RNY4P9, SPRYD7, DLEU1, DLEU2, DLEU7, GUCY1B2, KCNRG, MIR3613, RNA5SP28, RNA5SP29, RNASEH2B, TRIM13, LINC00371, FAM124A, SERPINE3, MIR5693, INTS6, RPS4XP16, RN7SL320P, MIR4703, RNY1P6, WDFY2, RN7SL413P, DHRS1…
400	13	13q32	13q33	0.265885	0.229588	0.0362968	0.0156856	0.0569081	0.000588903	0.00147506	0.62134	0.745908	GPC6, SNORD22, RNA5SP35, DCT, TGDS, GPR180, RNA5SP36, RN7SL585P, LINC00391, SOX21, LINC00557, ABCC4, snoU13.ENSG00000238463.1, RNY3P8, RNY4P27, CLDN10, DZIP1, DNAJC3, snR65.ENSG00000251901.1, UGGT2, HS6ST3, RN7SL164P, LINC00359, RN7SKP7, SNORD112.ENSG00000252154.1, OXGR1, snoU13.ENSG00000238522.1, MBNL2, RNA5SP37, RAP2A, snoU13.ENSG00000238407.1, IPO5, FARP1, RNF113B, RN7SKP8, MIR3170, STK24, RN7…
401	13	13q33.2|13q34	13q34	0.242673	0.21598	0.0266925	0.0065892	0.0467957	0.00960583	0.0185079	0.691087	0.778917	DAOA, LINC00343, LINC00344, SNORA25.ENSG00000252550.1, RNA5SP38, LINC00460, EFNB2, ARGLU1, LINC00551, LINC00443, FAM155A, SNORD31, MIR1267, LIG4, ABHD13, TNFSF13B, RNA5SP39, MYO16, LINC00676, IRS2, RN7SKP10, RN7SL783P, COL4A1, COL4A2, snoU13.ENSG00000238629.1, RAB20, CARKD, CARS2, ING1, LINC00567, LINC00346, ANKRD10, ARHGEF7, TEX29, LINC00354, SNORD44, SOX1, LINC00403, LINC00404, SPACA7, TUBGCP3,…
402	14	14q11.2	14q11.2	0.244783	0.200977	0.0438061	0.0239761	0.0636362	1.71064e-05	5.45331e-05	0.294158	0.519012	LINC00516, MED15P1, MED15P6, OR11H12, OR4K13, OR4K14, OR4K15, OR4K1, OR4K2, OR4K5, OR4M1, OR4N2, OR4Q2, OR4Q3, POTEG, POTEM, snoU13.ENSG00000238492.1, OR4L1, RNA5SP380, OR4K17, OR4N5, RNA5SP381, OR11G2, OR11H6, OR11H7, OR11H4, TTC5, CCNB1IP1, SNORA79.ENSG00000222489.1, SNORD126, RPPH1, PARP2, TEP1, RNA5SP382, KLHL33, OSGEP, APEX1, TMEM55B, PNP, RNASE10, RNASE9, RNASE11, RNASE12, OR6S1, ANG, RNASE…
403	14	14q11.2	14q12	0.250879	0.20307	0.0478088	0.0278654	0.0677522	3.11609e-06	1.1462e-05	0.262903	0.500556	ABHD4, DAD1, OR4E2, OR6J1, TRAC, TRAJ10, TRAJ11, TRAJ12, TRAJ13, TRAJ14, TRAJ16, TRAJ17, TRAJ18, TRAJ19, TRAJ1, TRAJ20, TRAJ21, TRAJ22, TRAJ23, TRAJ24, TRAJ25, TRAJ26, TRAJ27, TRAJ28, TRAJ29, TRAJ2, TRAJ30, TRAJ31, TRAJ32, TRAJ33, TRAJ34, TRAJ35, TRAJ36, TRAJ37, TRAJ38, TRAJ39, TRAJ3, TRAJ40, TRAJ41, TRAJ42, TRAJ43, TRAJ44, TRAJ45, TRAJ46, TRAJ47, TRAJ48, TRAJ49, TRAJ4, TRAJ50, TRAJ52, TRAJ53, TR…
404	14	14q12	14q12	0.255334	0.204815	0.050519	0.0304902	0.0705479	9.37521e-07	3.79335e-06	0.338397	0.559019	SNORD37.ENSG00000212270.1, NOVA1, MIR4307, LINC00645, BNIP3P1, C14orf23, FOXG1, PRKD1, G2E3, SCFD1, COCH, STRN3, MIR624, AP4S1, HECTD1, HEATR5A, DTD2, GPR33, NUBPL, ARHGAP5, AKAP6, RN7SL660P
405	14	14q13.1	14q21.1	0.251348	0.205164	0.0461842	0.0261933	0.0661751	6.92409e-06	2.3961e-05	0.547052	0.68534	NPAS3, EGLN3, SPTSSA, EAPP, SNX6, CFL2, BAZ1A, SRP54, FAM177A1, PPP2R3C, KIAA0391, PSMA6, NFKBIA, INSM2, RALGAPA1, SNORA31.ENSG00000253059.1, snoU13.ENSG00000238718.1, BRMS1L, LINC00609, PTCSC3, RN7SKP21, MBIP, DPPA3P2, SFTA3, RN7SKP257, PAX9, SLC25A21, MIR4503, MIPOL1, FOXA1, TTC6, SNORA42.ENSG00000200385.1, LINC00517
406	14	14q13	14q21.1	0.243611	0.19993	0.0436806	0.0238859	0.0634753	1.74885e-05	5.54155e-05	0.626652	0.745908	SSTR1, CLEC14A, LINC00639, SEC23A, GEMIN2, TRAPPC6B, PNN, MIA2, CTAGE5, FBXO33
407	14	14q21.1	14q21.1	0.24408	0.200628	0.0434517	0.0236371	0.0632663	1.9692e-05	6.16546e-05	0.486085	0.639886	SNORA31.ENSG00000251858.1, LRFN5
408	14	14q21.2	14q31	0.315358	0.285066	0.0302913	0.0083747	0.0522078	0.00688719	0.013568	0.377549	0.568009	FSCB, snoU13.ENSG00000238501.1, C14orf28, KLHL28, FAM179B, PRPF39, SNORD58, SNORD127, FKBP3, FANCM, MIS18BP1, LINC00871, RPL10L, MDGA2, SNORA25.ENSG00000251735.1, LINC00648, MIR548Y, SNORD112.ENSG00000251824.1, RNA5SP384, RPS29, RN7SL1, LRR1, MGAT2, RPL36AL, DNAAF2, POLE2, RNU6ATAC30P, KLHDC1, KLHDC2, NEMF, RN7SL3, RN7SL2, ARF6, C14orf182, RN7SKP193, C14orf183, METTL21D, SOS2, L2HGDH, MIR4504, AT…
409	14	14q24.2-q24.3	14q32.33	0.303165	0.266225	0.0369406	0.0153859	0.0584953	0.000809029	0.0019793	0.844269	0.889241	DIO2, CEP128, TSHR, GTF2A1, SNORA79.ENSG00000221303.1, STON2, SEL1L, snoU13.ENSG00000238978.1, RNU6ATAC28P, RNU3P3, LINC00911, FLRT2, GALC, GPR65, KCNK10, SPATA7, PTPN21, ZC3H14, EML5, TTC8, FOXN3, RN7SKP107, RN7SKP255, EFCAB11, TDP1, KCNK13, PSMC1, NRDE2, CALM1, LINC00642, TTC7B, RPS6KA5, C14orf159, SNORA11B, RN7SL506P, GPR68, CCDC88C, SMEK1, CATSPERB, U3.ENSG00000200042.1, TC2N, FBLN5, TRIP11, …
410	15	15q11.1	15q11.1	0.31442	0.278786	0.0356339	0.0138097	0.0574582	0.0014092	0.0032944	0.285953	0.51901	CHEK2P2, CT60, CYFIP1, DKFZP547L112, GOLGA6L1, GOLGA6L2, GOLGA6L6, GOLGA8DP, GOLGA8EP, GOLGA8I, GOLGA8S, HERC2P2, HERC2P3, MIR1268A, NBEAP1, NIPA1, NIPA2, OR4M2, OR4N4, POTEB2, POTEB, RN7SL106P, RN7SL400P, RN7SL495P, RN7SL536P, RN7SL545P, RN7SL584P, RN7SL759P, TUBGCP5, WHAMMP3, snoU13.ENSG00000238960.1, snoU13.ENSG00000239083.1, MIR4508, MKRN3, MAGEL2, NDN, PWRN1, PWRN2, NPAP1, SNRPN, snoU13.ENSG…
411	16	16p13.3	16p13.3	0.185932	0.144103	0.0418287	0.0241691	0.0594884	4.48259e-06	1.58244e-05	0.730985	0.809806	ARHGDIG, AXIN1, C16orf11, CAPN15, DDX11L10, DECR2, HBA1, HBA2, HBM, HBQ1, HBZ, ITFG3, LUC7L, MIR3176, MIR5587, MPG, MRPL28, NHLRC4, NME4, NPRL3, PDIA2, PIGQ, POLR3K, RAB11FIP3, RAB40C, RGS11, RHBDF1, SNRNP25, TMEM8A, WASH4P, WASIR2, C16orf13, FAM195A, WDR90, WFIKKN1, RHOT2, JMJD8, RHBDL1, STUB1, FBXL16, WDR24, METRN, CCDC78, FAM173A, HAGHL, NARFL, CHTF18, GNG13, MIR662, MSLNL, MSLN, PRR25, RPUSD1…
412	16	16p13.3	16p13.3	0.192497	0.155269	0.0372284	0.0191657	0.0552911	6.28017e-05	0.000179531	0.555729	0.693632	RBFOX1
413	16	16p13.3	16p13.3	0.150762	0.121773	0.0289895	0.0126149	0.0453642	0.00059619	0.00148624	0.914754	0.934158	SNORA40.ENSG00000252138.1
414	16	16p13.2	16p13.2	0.170223	0.140614	0.0296086	0.0123113	0.046906	0.000884062	0.00214293	0.94988	0.958412	TMEM114, METTL22, ABAT, RN7SL743P, TMEM186, PMM2, C16orf72, CARHSP1, USP7, RNA5SP403, RNA5SP404, GRIN2A, RN7SL493P, ATF7IP2, RN7SL99P, EMP2, TEKT5, NUBP1, TVP23A, CIITA, DEXI, CLEC16A, RMI2, SOCS1, TNP2, PRM3, SNORA48.ENSG00000212228.1, PRM2, PRM1, snoU13.ENSG00000238409.1, MIR548H2, snoU13.ENSG00000272310.1, RN7SL522P, LITAF, SNN, TXNDC11, ZC3H7A, BCAR4, RSL1D1, GSPT1, TNFRSF17, SNX29, ACA64.ENS…
415	16	16p12.1	16p12.1	0.130832	0.113747	0.017085	0.00138087	0.0327891	0.0348734	0.0578657	0.568146	0.703916	C16orf82, KDM8, NSMCE1, IL4R, IL21R, GTF3C1, KIAA0556, GSG1L, XPO6, SNORA25.ENSG00000200652.1, SBK1, NPIPB6, CLN3, EIF3CL, NPIPB7, snoU13.ENSG00000238703.1, APOBR, IL27, NUPR1, CCDC101, SULT1A2, SULT1A1, ATP2A1, ATXN2L, CD19, EIF3C, LAT, MIR4517, MIR4721, NFATC2IP, NPIPB8, NPIPB9, RABEP2, RRN3P2, SH2B1, SNORA43.ENSG00000252461.1, SPNS1, TUFM, snoU13.ENSG00000238352.1, snoU13.ENSG00000238684.1, sn…
416	16	16p11.2	16p11.2	0.130598	0.107118	0.02348	0.00800725	0.0389527	0.00326017	0.00697093	0.883001	0.915604	CD2BP2, TBC1D10B, MYLPF, SEPT1, ZNF48, ZNF771, DCTPP1, SNORA42.ENSG00000199787.1, SEPHS2, ITGAL, MIR4518, ZNF747, ZNF768, ZNF764, ZNF688, ZNF785, ZNF689, FBRS, PRR14, SRCAP, SNORA30.ENSG00000206755.1, PHKG2, C16orf93, RNF40, ZNF629, BCL7C, MIR4519, MIR762, CTF1, FBXL19, ORAI3, SETD1A, HSD3B7, STX1B, STX4, ZNF668, PRSS53, ZNF646, VKORC1, BCKDK, KAT8, PRSS8, PRSS36, FUS, C16orf98, PYCARD, PYDC1, TR…
417	16	16q11.2	16p11.2	0.178195	0.150733	0.0274619	0.00974948	0.0451743	0.00257077	0.00565785	0.739495	0.814411	ANKRD26P1, ARHGAP23P1, HERC2P4, HERC2P5, HERC2P8, LINC00273, RNA5SP406, RNA5SP407, RNA5SP408, RNA5SP409, RNA5SP410, RNA5SP413, RNA5SP415, RNA5SP416, RNA5SP417, RNA5SP418, RNA5SP419, RNA5SP420, RNA5SP421, RNA5SP422, RNA5SP423, SLC6A10P, TP53TG3B, TP53TG3C, TP53TG3D, TP53TG3, ZNF267
418	16	16q11.2	16q21	0.214771	0.185276	0.0294957	0.0103833	0.0486082	0.00264313	0.00579286	0.899505	0.925954	SHCBP1, VPS35, ORC6, MYLK3, C16orf87, GPT2, DNAJA2, NETO2, snoU13.ENSG00000238834.1, ITFG1, RNA5SP424, PHKB, RNA5SP425, ABCC12, ABCC11, LONP2, SIAH1, RN7SL54P, snoU13.ENSG00000239013.1, N4BP1, snoU13.ENSG00000239038.1, CBLN1, C16orf78, ZNF423, CNEP1R1, HEATR3, RNY4P3, SNORA70.ENSG00000252526.1, PAPD5, ADCY7, BRD7, snoU13.ENSG00000238544.1, SNORD112.ENSG00000252077.1, NKD1, SNX20, NOD2, CYLD, RNA5…
419	16	16q22.1	16q22.1	0.197655	0.175506	0.0221494	0.00350578	0.040793	0.0207438	0.036615	0.732528	0.809806	CDH8, RN7SKP76, snoU13.ENSG00000238507.1
420	16	16q21	16q22.2	0.203283	0.187718	0.0155645	-0.00344227	0.0345712	0.111893	0.163035	NA	NA	CDH11, LINC00922, RNA5SP428, CDH5, LINC00920, BEAN1, TK2, CKLF, CMTM1, CMTM2, CMTM3, CMTM4, DYNC1LI2, CCDC79, NAE1, CA7, PDP2, CDH16, RRAD, FAM96B, CES2, CES3, CES4A, RN7SL543P, CBFB, C16orf70, B3GNT9, FBXL8, TRADD, HSF4, NOL3, KIAA0895L, EXOC3L1, E2F4, ELMO3, MIR328, LRRC29, TMEM208, FHOD1, SLC9A5, PLEKHG4, KCTD19, RN7SKP118, LRRC36, TPPP3, ZDHHC1, HSD11B2, ATP6V0D1, AGRP, FAM65A, CTCF, RLTPR, A…
421	16	16q22.3	16q23	0.220164	0.187369	0.032795	0.0135632	0.0520268	0.000895196	0.00215997	0.659973	0.768171	ZFHX3, HCCAT5, C16orf47, CLEC18B, NPIPB15, PSMD7, GLG1, RFWD3, MLKL, FA2H, WDR59, ZNRF1, LDHD, ZFP1, CTRB1, CTRB2, BCAR1, CFDP1, SNORA76.ENSG00000252122.1, TMEM170A, CHST6, CHST5, TMEM231, GABARAPL2, ADAT1, KARS, TERF2IP, RN7SL520P, RNA5SP430, CNTNAP4, RN7SKP233, SNORD33.ENSG00000252022.1, MIR4719, MON1B, SYCE1L, ADAMTS18, NUDT7, VAT1L, CLEC3A
422	16	16q23	16q23	0.269637	0.227495	0.0421418	0.0215294	0.0627542	6.68544e-05	0.000190083	0.393329	0.568724	WWOX
423	16	16q23	16q23	0.225088	0.191905	0.0331828	0.0137872	0.0525785	0.000858648	0.00209097	0.571485	0.705459	PIH1
424	16	16q23	16q23	0.221805	0.191207	0.0305981	0.0112605	0.0499358	0.00204754	0.00458401	0.673014	0.768833	RNA5SP431, MAF, DYNLRB2, CDYL2, CMC2, CENPN, ATMIN, C16orf46, GCSH, PKD1L2, BCMO1, GAN, MIR4720, CMIP, PLCG2, X7SK.ENSG00000260682.2, SDR42E1, HSD17B2, MPHOSPH6, RN7SKP190, snoU13.ENSG00000238321.1
425	16	16q23.3	16q23.3	0.231653	0.200977	0.030676	0.0110051	0.050347	0.00236469	0.00524821	0.977336	0.980655	CDH13
426	16	16q23.3	16q24.3	0.234936	0.202373	0.0325629	0.0128226	0.0523032	0.00130121	0.00306923	0.870377	0.905299	RN7SL134P, MIR3182, HSBP1, MLYCD, OSGIN1, NECAB2, MBTPS1, RNA5SP432, SLC38A8, HSDL1, DNAAF1, ADAD2, ATP2C2, COTL1, CRISPLD2, KCNG4, KLHL36, RNA5SP433, TAF1C, TLDC1, USP10, WFDC1, ZDHHC7, KIAA0513, FAM92B, LINC00311, MIR5093, GSE1, RN7SL381P, GINS2, C16orf74, MIR1910, EMC8, COX4I1, IRF8, LINC00917, FENDRR, FOXF1, MTHFSD, FOXC2, FOXL1, C16orf95, snoU13.ENSG00000239186.1, FBXO31, MAP1LC3B, ZCCHC14, …
427	17	17p13.3	17p12	0.368347	0.331821	0.0365257	0.0137231	0.0593282	0.00170273	0.00391108	0.254413	0.4956	ABR, C17orf97, DBIL5P, DOC2B, FAM101B, FAM57A, GEMIN4, GLOD4, MIR3183, NXN, RNMTL1, RPH3AL, TIMM22, VPS53, BHLHA9, TUSC5, YWHAE, CRK, MYO1C, INPP5K, PITPNA, SLC43A2, RN7SL105P, snoU13.ENSG00000238946.1, SCARF1, RILP, PRPF8, MIR22HG, TLCD2, WDR81, SERPINF2, SERPINF1, SMYD4, RPA1, RTN4RL1, DPH1, OVCA2, HIC1, MIR132, MIR212, SMG6, RN7SL624P, SRR, SNORD91A, SNORD91B, TSR1, SGSM2, MNT, METTL16, RN7SL3…
428	17	17p12	17p12	0.332005	0.284717	0.0472873	0.0252535	0.0693212	2.71741e-05	8.26217e-05	0.145405	0.45883	LINC00670, MYOCD, ARHGAP44, MIR1269B, RN7SL550P, ELAC2, HS3ST3A1, MIR548H3
429	17	17p12	17p12	0.325909	0.280879	0.0450293	0.0230902	0.0669683	6.0019e-05	0.000172514	0.171646	0.46908	COX10, SNORA74.ENSG00000252305.1, CDRT15, CDRT1, CDRT4, CDRT7, CDRT8, HS3ST3B1, MIR4731, PMP22, RN7SL792P, SNORA74.ENSG00000252129.1, TEKT3, TRIM16, TVP23C, snoU13.ENSG00000238806.1
430	17	17p11.2	17p11.2	0.319578	0.273552	0.046026	0.0242352	0.0678168	3.66387e-05	0.000108881	0.108134	0.428721	TBC1D26, ZNF286A, RNA5SP436, ADORA2B, ZSWIM7, TTC19, NCOR1, RN7SL442P, PIGL, MIR1288, CENPV, UBB, TRPV2, FAM211A, ZNF287, ZNF624, CCDC144A, RN7SL620P, KRT16P2, KRT17P1, USP32P1, TBC1D27, TNFRSF13B, MPRIP, RN7SL775P, PLD6, FLCN, COPS3, NT5M, MED9, RASD1, PEMT, SMCR2, RAI1, SMCR5, MIR33B, SREBF1, TOM1L2, LRRC48, ATPAF2, GID4, DRG2, MYO15A, snoU13.ENSG00000238691.1, ALKBH5, LLGL1, FLII, SMCR7, TOP3A…
431	17	17p11.2	17p11.2	0.293552	0.245639	0.0479136	0.0267616	0.0690657	9.90819e-06	3.29855e-05	0.0542594	0.344344	SLC5A10, EPN2, FAM83G, GRAPL, GRAP, SNORD3A, SNORD3C, SNORD3D
432	17	17p11.2	17p11.1	0.283705	0.240405	0.0432998	0.0223248	0.0642748	5.61699e-05	0.000162337	0.159742	0.45883	B9D1, MIR1180, MAPK7, MFAP4, RNF112, SLC47A1, SNORA59B, ALDH3A2, SNORA31.ENSG00000252349.1, SLC47A2, ALDH3A1, ULK2, AKAP10
433	17	17p11.2	17p11.2	0.282063	0.234124	0.0479391	0.0270869	0.0687913	7.39954e-06	2.5439e-05	0.0623007	0.348106	SPECC1, CCDC144CP, RN7SL17P, U6.ENSG00000266839.2, UPF3AP2, USP32P3, KRT16P3, LGALS9B, NOS2P3, CDRT15L2
434	17	17p11.2	17q11.2	0.276436	0.220516	0.0559197	0.035366	0.0764734	1.21539e-07	5.91941e-07	0.00622097	0.146883	CCDC144NL, USP22, DHRS7B, TMEM11, RN7SL426P, C17orf103, MAP2K3
435	17	17p11.2	17p11.2	0.253693	0.20656	0.0471332	0.0270879	0.0671785	4.74838e-06	1.6651e-05	0.00837429	0.146883	KCNJ12
436	17	17p11.2	17p11.2	0.223916	0.178646	0.0452694	0.0261843	0.0643545	4.09037e-06	1.45374e-05	0.00771041	0.146883	C17orf51, FAM27L, MTND1P15, MTRNR2L1, UBBP4
437	17	17p11.2	17q11.2	0.134349	0.115492	0.0188574	0.00301987	0.0346949	0.020874	0.0367214	0.0438851	0.33195	MIR4522, WSB1, TBC1D3P5, KSR1, LGALS9, RN7SL576P, NOS2, LYRM9, SCARNA20.ENSG00000251818.1, SNORA70.ENSG00000202389.1, NLK, Vault.ENSG00000252283.1, PYY2, PPY2, KRT18P55, TMEM97, IFT20, TNFAIP1, POLDIP2, TMEM199, MIR4723, SARM1, SEBOX, VTN, SLC46A1, SLC13A2, FOXN1, UNC119, PIGS, ALDOC, SPAG5, KIAA0100, SGK494, SDF2, SUPT6H, PROCA1, RAB34, RPL23A, SNORD42B, SNORD42A, SNORD4A, SNORD4B, TLCD1, NEK8, …
438	17	17q12	17q12	0.120281	0.102582	0.0176994	0.00261925	0.0327795	0.0229061	0.0396724	0.0917083	0.396427	ASIC2, C17orf102, CCL11, CCL13, CCL1, CCL2, CCL7, CCL8, RNA5SP438, TMEM132E
439	17	17q12	17q12	0.122392	0.106769	0.0156225	0.000345055	0.0309	0.0475576	0.0769702	0.212134	0.476086	CCT6B, ZNF830, LIG3, RFFL, snoU13.ENSG00000238858.1, RAD51D, Vault.ENSG00000252328.1, FNDC8, NLE1, UNC45B, SLC35G3, SLFN5, SLFN11, SLFN12, SLFN13, SLFN12L, SLFN14, AP2B1, PEX12, SNORD7, RASL10B, GAS2L2, MMP28, C17orf50, TAF15, C17orf66, CCL5, RN7SKP274, RDM1, LYZL6, CCL16, CCL14, CCL15, CCL23, CCL18, CCL3L1, CCL3L3, CCL3, CCL4L1, CCL4L2, CCL4, GGNBP2, MYO19, PIGW, RN7SL301P, RNA5SP439, TBC1D3B, T…
440	17	17q21.2	17q12|17q12	0.109965	0.0956036	0.0143612	-0.000214928	0.0289373	0.0565637	0.0893469	0.225141	0.476086	MRPL45, GPR179, SOCS7, RN7SL458P, ARHGAP23, SRCIN1, RN7SL102P, C17orf96, MIR4734, MLLT6, CISD3, MIR4726, RNA5SP440, PCGF2, PSMB3, PIP4K2B, CWC25, MIR4727, C17orf98, RPL23, SNORA21.ENSG00000199293.1, SNORA21.ENSG00000252699.1, LASP1, LINC00672, FBXO47
441	17	17q12	17q12	0.107386	0.0959525	0.0114332	-0.00309248	0.0259588	0.128777	0.185074	NA	NA	LRRC37A11P, PLXDC1, ARL5C, CACNB1, RPL19, STAC2, FBXL20, MED1
442	17	17q12	17q21	0.101524	0.0952547	0.00626932	-0.00808196	0.0206206	0.407311	0.502924	NA	NA	CDK12, NEUROD2, PPP1R1B, STARD3, TCAP, PNMT, PGAP3, ERBB2, MIR4728, MIEN1, GRB7, IKZF3
443	17	17q12	17q21.2	0.105979	0.0959525	0.0100264	-0.00446423	0.0245169	0.182864	0.250485	NA	NA	ZPBP2, GSDMB, ORMDL3, LRRC3C, GSDMA, PSMD3, CSF3, MED24, SNORD124, THRA, NR1D1, MSL1, CASC3, RAPGEFL1, WIPF2, RNY4P8, CDC6, RARA, GJD3, RNA5SP441, TOP2A, IGFBP4, TNS4, CCR7, KRT222, SMARCE1, KRT24, KRT223P, KRT25, KRT26, KRT27, KRT28, KRT10, TMEM99, KRT12, KRT20, KRT23, KRT39, KRT40
444	17	17q21.2	17q21	0.10973	0.0973482	0.0123821	-0.00225415	0.0270184	0.102135	0.150485	NA	NA	KRT33A, KRT33B, KRT31, KRT34, KRT37, KRT38, KRT32, KRT35, KRT36, KRT13, KRT15, KRT19, LINC00974, KRT9, KRT14, KRT16, JUP, KRT17, KRT42P, EIF1, GAST, HAP1, RNA5SP442, RN7SL399P, LEPREL4, FKBP10, NT5C3B, KLHL10, RN7SL871P, KLHL11, ACLY, TTC25, CNP, DNAJC7, NKIRAS2, ZNF385C, DHX58, KAT2A, HSPB9, RAB5C, KCNH4, HCRT, GHDC, STAT5B, STAT5A, STAT3, PTRF, ATP6V0A1, MIR548AT, MIR5010, NAGLU, HSD17B1, COASY…
445	17	17q21.31	17q21.31	0.106917	0.0910677	0.0158491	0.00152348	0.0301747	0.0322071	0.0537807	0.214386	0.476086	NBR1, ARL4D, LINC00854, LINC00910, TMEM106A, MIR2117, DHX8, ETV4, MEOX1, SOST, DUSP3, C17orf105, MPP3, CD300LG, MPP2, FAM215A, PPY, PYY, NAGS, TMEM101, U3.ENSG00000221044.1, LSM12, G6PC3, HDAC5, C17orf53, ASB16, TMUB2, ATXN7L3, UBTF, SLC4A1, RN7SL507P, RUNDC3A, U3.ENSG00000221496.1, SLC25A39, GRN, FAM171A2, ITGA2B, GPATCH8, RN7SL258P, FZD2, C17orf104, CCDC43, DBF4B, RN7SL819P, ADAM11, GJC1, HIGD1…
446	17	17q21.31	17q21	0.0996483	0.0833915	0.0162568	0.00242769	0.0300859	0.0229285	0.0396724	0.200989	0.476086	ARHGAP27, ARL17A, ARL17B, CRHR1, FAM215B, KANSL1, LRRC37A2, LRRC37A4P, LRRC37A, MAPT, NSF, PLEKHM1, RN7SL199P, RN7SL656P, RN7SL730P, RN7SL739P, SPPL2C, STH, WNT3, WNT9B, RNU6ATAC3P, GOSR2, MIR5089, LRRC37A17P, RPRML, RN7SL270P, CDC27, MYL4, snoU13.ENSG00000252088.1, ITGB3, EFCAB13, MRPL45P2, NPEPPS
447	17	17q21.32	17q21.32	0.0966002	0.0802512	0.016349	0.00273309	0.0299649	0.0201963	0.0358894	0.137192	0.457792	KPNB1, TBKBP1, TBX21, OSBPL7, MRPL10, LRRC46, SCRN2, SP6, SP2, PNPO, PRR15L, CDK5RAP3, COPZ2, MIR152, NFE2L1, CBX1, SNX11, SKAP1, MIR1203, U3.ENSG00000200538.1, HOXB1, HOXB2, HOXB3, HOXB4, MIR10A, HOXB5, HOXB6, HOXB7, HOXB8, HOXB9, MIR196A1, HOXB13, MIR3185, PRAC, TTLL6, RN7SL125P, CALCOCO2, SNORA68.ENSG00000212565.1, ATP5G1, UBE2Z, SNF8, snoU13.ENSG00000238804.1, GIP, IGF2BP1, B4GALNT2, GNGT2, A…
448	17	17q21.32	17q22	0.0893318	0.0743196	0.0150122	0.0018564	0.0281679	0.0274173	0.0463713	0.135244	0.457792	C17orf112, KIF2B
449	17	17q22	17q23.1	0.100352	0.0868807	0.013471	-0.00051918	0.0274612	0.0626769	0.0984121	0.292617	0.51901	RN7SKP14, TOM1L1, COX11, STXBP4, HLF, MMD, TMEM100, PCTP, ANKFN1, NOG, C17orf67, DGKE, TRIM25, MIR3614, COIL, SCPEP1, RNF126P1, AKAP1, MSI2, RN7SL437P, RN7SL449P, RN7SKP94, MRPS23, CUEDC1, VEZF1, SRSF1, DYNLL2, OR4D1, OR4D2, EPX, MKS1, LPO, MPO, BZRAP1, MIR142, MIR4736, SUPT4H1, RNF43, HSF5, MTMR4, SEPT4, C17orf47, TEX14, U3.ENSG00000212195.1, RAD51C, PPM1E, RN7SL716P, TRIM37, SKA2, MIR454, MIR30…
450	17	17q23.1	17q23.1	0.0883939	0.077111	0.0112829	-0.00196886	0.0245348	0.100637	0.149113	NA	NA	VMP1, MIR21, TUBD1
451	17	17q23.1	17q21-q22	0.0867526	0.0781577	0.00859493	-0.00465556	0.0218454	0.213481	0.285728	NA	NA	RPS6KB1, RNFT1, HEATR6, MIR4737, CA4, USP32, SCARNA20.ENSG00000252577.1, C17orf64, RPL12P38, APPBP2, PPM1D, BCAS3, RN7SL606P, RN7SL448P, snoU13.ENSG00000238799.1, TBX2, C17orf82, TBX4
452	17	17q23.2	17q23.3	0.0832356	0.0732729	0.00996278	-0.00296794	0.0228935	0.138226	0.197574	NA	NA	NACA2, BRIP1, INTS2, MED13, RN7SL800P, TBC1D3P2, EFCAB3, METTL2A, TLK2, MRC2, MARCH10, MIR633, TANC2
453	17	17q23.3	17q24.3	0.0935522	0.0830426	0.0105096	-0.00314032	0.0241595	0.138013	0.197574	NA	NA	CYB561, ACE, KCNH6, DCAF7, TACO1, MAP3K3, LIMD2, STRADA, CCDC47, DDX42, FTSJ3, PSMC5, SMARCD2, RN7SL805P, TCAM1P, CSH1, CSH2, CSHL1, GH2, GH1, CD79B, SCN4A, C17orf72, ICAM2, ERN1, SNORA76.ENSG00000266402.2, SNORD104, TEX2, MILR1, POLG2, DDX5, MIR3064, MIR5047, CEP95, SMURF2, PLEKHM1P, RN7SL409P, LRRC37A3, RN7SL404P, SLC16A6P1, AMZ2P1, GNA13, RGS9, AXIN2, CEP112, APOH, RNA5SP444, PRKCA, RN7SL735P,…
454	17	17q24.3	17q24.3	0.0958968	0.0753664	0.0205305	0.00714316	0.0339178	0.00304465	0.00659047	0.0445234	0.33195	LINC00511
455	17	17q21.31	17q25.3	0.106682	0.0840893	0.022593	0.00855104	0.0366349	0.00186348	0.00426169	0.0197614	0.237842	SLC39A11, RN7SKP180, SCARNA24.ENSG00000252274.1, SSTR2, COG1, FAM104A, C17orf80, CPSF4L, CDC42EP4, SDK2, LINC00469, BTBD17, C17orf77, CD300A, CD300C, CD300E, CD300LB, CD300LD, CD300LF, DNAI2, GPR142, GPRC5C, KIF19, RAB37, RNA5SP448, RPL38, TTYH2, MIR3615, SLC9A3R1, NAT9, TMEM104, GRIN2C, FDXR, FADS6, USH1G, OTOP2, OTOP3, HID1, CDR2L, ICT1, KCTD2, ATP5H, RN7SL573P, SLC16A5, ARMC7, HN1, NT5C, SUMO2…
456	17	17q25	17q25.3	0.0982415	0.0844382	0.0138033	-3.1451e-05	0.027638	0.0537345	0.0853675	0.304406	0.531528	CARD14, SGSH, SLC26A11, RNF213, ENDOV, MIR4730, NPTX1, RPTOR, CHMP6, BAIAP2, AATK, MIR1250, MIR338, MIR657
457	17	17q25.3	17q25.3	0.112544	0.0924634	0.0200806	0.00556098	0.0346002	0.00739386	0.0145118	0.0757906	0.367141	AZI1, ENTHD2, C17orf89, SLC38A10, LINC00482, TMEM105, MIR4740, MIR3186, ACTG1, FSCN2, C17orf70, NPLOC4, TSPAN10, PDE6G, OXLD1, CCDC137, ARL16, HGS, MRPL12, SLC25A10, FAM195B, GCGR, P4HB, PPP1R27, ARHGDIA, ALYREF, ANAPC11, NPB, PCYT2, SIRT7, MAFG, MYADML2, PYCR1, NOTUM, ASPSCR1, STRA13, DCXR, LRRC45, RAC3, RFNG, GPS1, DUS1L, FASN, CCDC57, CSNK1D, SLC16A3, snoU13.ENSG00000238947.1, CD7, SECTM1, TEX…
458	18	18p11.32	18p11.32	0.222978	0.218423	0.00455484	-0.015355	0.0244647	0.670626	0.752131	NA	NA	COLEC12, ROCK1P1, THOC1, USP14, C18orf56, CETN1, CLUL1, ENOSF1, RN7SKP146, TYMS, YES1, ADCYAP1, LINC00470, RN7SKP72
459	18	18p11.32	18p11.32	0.224385	0.217725	0.00665947	-0.0132548	0.0265737	0.525643	0.613056	NA	NA	METTL4, CBX3P2, NDC80, SMCHD1, snoU109.ENSG00000238575.1, snoU13.ENSG00000238425.1, EMILIN2, LPIN2, SNORA70.ENSG00000252258.1, MYOM1, MYL12A, MYL12B, TGIF1, snoU13.ENSG00000238863.1
460	18	18p11.31	18p11.31	0.223681	0.220516	0.00316473	-0.0167941	0.0231235	0.774855	0.835192	NA	NA	DLGAP1, RN7SL39P, snoU13.ENSG00000238445.1, snoU13.ENSG00000238790.1
461	18	18p11.31	18p11.31	0.227198	0.218074	0.00912415	-0.0108322	0.0290805	0.380077	0.478279	NA	NA	C18orf42, LINC00667, LINC00526, ZBTB14, EPB41L3, snR65.ENSG00000252576.1, SNORD112.ENSG00000252572.1, MIR3976, TMEM200C, L3MBTL4, RN7SL282P, RN7SL723P, RPL6P27
462	18	18p11.31	18p11.31	0.227198	0.216678	0.0105198	-0.00940958	0.0304492	0.30898	0.398342	NA	NA	ARHGAP28, LINC00668, LAMA1, RN7SL537P, LRRC30, SNORA48.ENSG00000212626.1
463	18	18p11.2	18p11.21	0.238453	0.217725	0.0207275	0.000640572	0.0408144	0.0444178	0.0725582	0.176857	0.470364	PTPRM, U3.ENSG00000199856.1, RN7SL50P, RAB12, SOGA2, NDUFV2, ANKRD12, snoU13.ENSG00000239087.1, TWSG1, RALBP1, PPP4R1, RAB31, RN7SL862P, RNA5SP449, TXNDC2, VAPA, RNA5SP450, snoU13.ENSG00000239031.1, APCDD1, NAPG, PIEZO2, NPIPB1P, GNAL, CHMP1B, MPPE1, IMPA2, ANKRD62, CIDEA, TUBB6, AFG3L2, SLMO1, SPIRE1, snoU13.ENSG00000238309.1, CEP76, PSMG2
464	18	18p11.3-p11.2	18p11.21	0.22837	0.214585	0.0137857	-0.00611773	0.0336891	0.179431	0.247791	NA	NA	PTPN2, SEH1L, CEP192, LDLRAD4, MIR5190, MIR4526, FAM210A, RN7SL362P, RNMT
465	18	18p11.2	18p11.21	0.227902	0.212142	0.0157592	-0.00409046	0.0356088	0.123079	0.177856	NA	NA	MC5R, MC2R, ZNF519, ANKRD20A5P, CYP4F35P, CXADRP3, POTEC
466	18	18p11.21	18q11.1	0.212896	0.2097	0.00319573	-0.0164108	0.0228022	0.768479	0.831729	NA	NA	ANKRD30B, RN7SL662P, ROCK1
467	18	18q11.2	18q11.2	0.220164	0.213189	0.00697501	-0.0127967	0.0267468	0.502299	0.595065	NA	NA	GREB1L, SNORD23.ENSG00000221139.1, ESCO1, SNRPD1, ABHD3, MIR320C1, MIB1, SNORA81.ENSG00000252677.1, RN7SL233P, SNORA73.ENSG00000199977.1, RNA5SP451
468	18	18q11.2	18p11.2	0.223447	0.208653	0.0147935	-0.0049302	0.0345172	0.145569	0.207499	NA	NA	RNU6ATAC20P, GATA6, snoU13.ENSG00000238907.1, CTAGE1
469	18	18q11.2	18q11.2	0.245721	0.221563	0.0241578	0.0039134	0.0444023	0.0199658	0.0357212	0.387438	0.568724	RBBP8, snoU13.ENSG00000238537.1, MIR4741, RN7SL745P, CABLES1, TMEM241, RIOK3, C18orf8, NPC1, ANKRD29, LAMA3, TTC39C, CABYR, OSBPL1A, RNA5SP452, RN7SL247P, MIR320C2, IMPACT, HRH4
470	18	18q11.2	18q11.2	0.25721	0.23552	0.02169	0.00106574	0.0423142	0.0403535	0.066331	0.772725	0.839466	ZNF521
471	18	18q11.2	18q11.2	0.269637	0.242149	0.0274872	0.00662011	0.0483544	0.0101261	0.0192286	0.535487	0.679051	RN7SL97P, SS18, PSMA8, TAF4B, U3.ENSG00000252921.1, KCTD1, U3.ENSG00000265369.2, AQP4, CHST9
472	18	18q11.2	18q11.2	0.27925	0.247383	0.0318666	0.0108183	0.0529149	0.00310687	0.00667026	0.522571	0.66707	CDH2
473	18	18q12.1	18q12.1	0.319812	0.278088	0.0417245	0.0198686	0.0635804	0.000189512	0.000519185	0.358035	0.565904	DSC3, DSC2, snoU13.ENSG00000238376.1, DSC1, DSG1, DSG4, DSG3, DSG2, TTR, B4GALT6, RN7SKP44, LRRC37A7P, SLC25A52, TRAPPC8, RNF125, RNF138, snoU13.ENSG00000238982.1, GAREM, RNA5SP453, MEP1B, WBP11P1, KLHL14, CCDC178, ASXL3, NOL4, DTNA, MAPRE2, ZNF397, ZSCAN30, ZNF271, ZNF24, ZNF396, INO80C, GALNT1, MIR187, MIR3929, C18orf21, RPRD1A, SLC39A6, ELP2, MOCOS, FHOD3, SNORD112.ENSG00000252078.1, TPGS2, KI…
474	18	18q12.1	18q12.2-q12.3	0.327784	0.278437	0.0493474	0.0274282	0.0712667	1.08502e-05	3.58944e-05	0.16645	0.467448	RN7SKP182, LINC00669
475	18	18q12.3	18q12.3	0.330832	0.282973	0.0478596	0.0258572	0.069862	2.1164e-05	6.54839e-05	0.130886	0.454727	PIK3C3, LINC00907, RNA5SP454, RIT2, SYT4
476	18	18q12.3	18q12.3	0.340211	0.287858	0.0523534	0.0302227	0.0744841	3.76555e-06	1.35663e-05	0.11896	0.440546	RNA5SP455, SETBP1, MIR4319, SLC14A2, SLC14A1, SIGLEC15, EPG5, PSTPIP2, RN7SKP26, ATP5A1, HAUS1, C18orf25, RNF165, LOXHD1, ST8SIA5, PIAS2, KATNAL2, TCEB3B, TCEB3CL2, TCEB3CL, TCEB3C, HDHD2, IER3IP1, SKOR2, MIR4527
477	18	18q21.1	18q21.32	0.368113	0.309142	0.0589709	0.0364133	0.0815285	3.17554e-07	1.34704e-06	0.106529	0.428721	SMAD2, ZBTB7C, RNA5SP456, CTIF, MIR4743, SMAD7, DYM, MIR4744, C18orf32, MIR1539, RPL17, SNORD58C, SNORD58A, SNORD58B, LIPG, ACAA2, SCARNA17.ENSG00000251992.1, SCARNA17.ENSG00000267322.1, SCARNA18.ENSG00000252139.1, MYO5B, RNA5SP457, RN7SL310P, CCDC11, MBD1, CXXC1, RNA5SP458, SKA1, MAPK4, MRO, ME2, ELAC1, SMAD4, RN7SL695P, MEX3C, snoU13.ENSG00000238885.1, DCC, MBD2, SNORA37, POLI, STARD6, C18orf54…
478	18	18q22	18q22.1	0.35381	0.30007	0.0537403	0.0313706	0.07611	2.62458e-06	9.86091e-06	0.181247	0.470364	MC4R, CDH20, RNF152, PIGN, KIAA1468, TNFRSF11A, ZCCHC2, RN7SL705P, PHLPP1, BCL2, snoU13.ENSG00000238988.1, KDSR, VPS4B, SERPINB5, SERPINB12, SERPINB13, SERPINB4, SERPINB11, SERPINB3, SERPINB7, SERPINB2, SERPINB10, HMSD, SERPINB8, LINC00305
479	18	18q22.1	18q22.1	0.354982	0.295185	0.0597975	0.037481	0.082114	1.64397e-07	7.45455e-07	0.0561419	0.344344	CDH7, CDH19, MIR5011, DSEL
480	18	18q22	18q22.2	0.357796	0.301814	0.0559816	0.0335675	0.0783958	1.03985e-06	4.14363e-06	0.140585	0.45883	TMX3, CCDC102B, DOK6, CD226, RTTN, SOCS6, RN7SL795P, GTSCR1
481	18	18q22.3	18q23	0.368347	0.306699	0.0616478	0.0391172	0.0841784	8.84084e-08	4.42884e-07	0.0563066	0.344344	CBLN2, MIR548AV, NETO1, RNA5SP460, RN7SL401P, FBXO15, TIMM21, RN7SL551P, CYB5A, C18orf63, FAM69C, CNDP2, CNDP1, LINC00909, ZNF407, ZADH2, TSHZ1, SMIM21, ZNF516, LINC00908, LINC00683, ZNF236, MBP, GALR1, SNORA25.ENSG00000199392.1, RNA5SP461, SALL3, ATP9B, ADNP2, CTDP1, HSBP1L1, KCNG2, NFATC1, PARD6G, PQLC1, RBFADN, RBFA, TXNL4A
482	19	19p13.3	19p13.2	0.254162	0.195394	0.0587675	0.0389447	0.0785903	9.02068e-09	5.71672e-08	0.0197177	0.237842	FAM138F, OR4F17, PPAP2C, WASH5P, MIER2, THEG, C2CD4C, SHC2, RNA5SP462, ODF3L2, MADCAM1, TPGS1, CDC34, GZMM, BSG, HCN2, POLRMT, FGF22, RNF126, FSTL3, PRSS57, PALM, MISP, PTBP1, MIR4745, AZU1, LPPR3, MIR3187, ARID3A, CFD, ELANE, KISS1R, MED16, PRTN3, R3HDM4, WDR18, GRIN3B, TMEM259, CNN2, ABCA7, HMHA1, POLR2E, GPX4, SBNO2, STK11, ATP5D, C19orf26, CIRBP, MIDN, C19orf24, EFNA2, MUM1, NDUFS7, GAMT, DAZ…
483	19	19p13.3-p13.2	19p13.2	0.217585	0.166783	0.050802	0.0320821	0.069522	1.47055e-07	6.7875e-07	0.0396526	0.33195	INSR, ARHGEF18, PEX11G, C19orf45, ZNF358, MCOLN1, PNPLA6, CAMSAP3, XAB2, PCP2, PET100, STXBP2, RETN, C19orf59, TRAPPC5, FCER2, CLEC4G, CD209, CLEC4M, EVI5L
484	19	19p13.2	19p13.2	0.214771	0.162596	0.0521754	0.0335972	0.0707537	5.49718e-08	2.84863e-07	0.0179186	0.237842	LRRC8E, RNA5SP463, MAP2K7, RN7SL115P, TGFBR3L, SNAPC2, CTXN1, TIMM44, ELAVL1, CCL25, FBN3, CERS4, CD320, NDUFA7, RPS28, KANK3, ANGPTL4, MIR4999, RAB11B, MARCH2, HNRNPM, PRAM1, ZNF414, MYO1F, ADAMTS10, ACTL9
485	19	19p13.2	19p13.2	0.2068	0.160851	0.0459482	0.0275274	0.0643689	1.33321e-06	5.23334e-06	0.0462957	0.33195	OR2Z1, ZNF558, MBD3L1, MUC16, OR1M1, OR7G2, OR7G1, OR7G3, ZNF317, OR7D2, OR7D4, OR7E24, OR7E19P, ZNF699, ZNF177, ZNF559, ZNF266, ZNF560, ZNF426, ZNF121, ZNF561, C19orf82
486	19	19p13.2	19p13.2	0.207034	0.164341	0.0426935	0.0241825	0.0612044	7.6032e-06	2.59694e-05	0.0422193	0.33195	ZNF562, ZNF812, ZNF846, FBXL12, SNORA70.ENSG00000200237.1, RN7SL94P, UBL5, PIN1, OLFM2, COL5A3, RDH8, C3P1, MIR5589, C19orf66, ANGPTL6, PPAN, SNORD105, P2RY11, SNORD105B, EIF3G, DNMT1, S1PR2, MIR4322, MRPL4, ICAM1, ICAM4, ICAM5, ZGLP1, FDX1L, RAVER1, ICAM3, TYK2, CDC37, MIR1181, PDE4A, KEAP1, S1PR5, ATG4D, MIR1238, KRI1, AP1M2, CDKN2D, SLC44A2, ILF3, QTRT1, DNM2, MIR638, MIR4748, MIR199A1, C19orf…
487	19	19p13	19p12	0.19109	0.151431	0.0396597	0.0217198	0.0575996	1.80146e-05	5.67407e-05	0.0124542	0.19986	CACNA1A, CCDC130, MRI1, C19orf53, ZSWIM4, RN7SL619P, MIR27A, MIR23A, NANOS3, MIR181C, MIR181D, C19orf57, CC2D1A, PODNL1, DCAF15, RFX1, IL27RA, RLN3, PALM3, C19orf67, PRKACA, SAMD1, ASF1B, LPHN1, RN7SL231P, CD97, DDX39A, PKN1, GIPC1, PTGER1, DNAJB1, MIR639, TECR, NDUFB7, CLEC17A, RN7SL337P, RN7SL842P, EMR3, ZNF333, EMR2, OR7A5, OR7C1, OR7A10, OR7A17, OR7C2, SLC1A6, CCDC105, CASP14, OR1I1, SYDE1, I…
488	19	19p12	19p12	0.173036	0.136776	0.0362603	0.0190235	0.0534972	4.5427e-05	0.000132014	0.0197215	0.237842	ZNF714, RNA5SP469, ZNF431, ZNF708, ZNF738, ZNF493, LINC00664, ZNF429, ZNF100, ZNF43, ZNF208, ZNF257, ZNF676, ZNF729, ZNF98, RN7SL860P, ZNF492, ZNF99, ZNF728, ZNF730, ZNF724P, ZNF91
489	19	19p12	19p12	0.16061	0.127355	0.0332544	0.0165192	0.0499896	0.000117465	0.000328653	0.0724244	0.367141	ZNF675, ZNF681, RPSAP58
490	19	19q11	19q11	0.158968	0.144452	0.0145161	-0.00268913	0.0317214	0.101973	0.150485	NA	NA	LINC00662
491	19	19p12	19p12	0.161079	0.146895	0.0141839	-0.00312781	0.0314956	0.112354	0.163255	NA	NA	ZNF254, ZNF726
492	19	19p12	19q12	0.127081	0.118632	0.00844865	-0.00733694	0.0242342	0.304987	0.39416	NA	NA	snoU13.ENSG00000238514.1, LINC00906, RNA5SP470, UQCRFS1, RN7SL340P
493	19	19q12	19q12	0.124502	0.117934	0.00656736	-0.00913888	0.0222736	0.427041	0.52238	NA	NA	VSTM2B, POP4, PLEKHF1, C19orf12, CCNE1, URI1
494	19	19q12	19q12	0.128722	0.117585	0.0111367	-0.00464984	0.0269232	0.173454	0.242007	NA	NA	ZNF536
495	19	19q12	19q12	0.132005	0.120377	0.0116279	-0.00432034	0.0275761	0.159137	0.223813	NA	NA	TSHZ3, THEG5, RNA5SP471
496	19	19q12	19q13.43	0.220633	0.205164	0.0154691	-0.00414753	0.0350857	0.125753	0.181222	NA	NA	RNA5SP472, ZNF507, DPY19L3, PDCD5, ANKRD27, SNORA68.ENSG00000201388.1, RN7SL789P, RGS9BP, NUDT19, TDRD12, SLC7A9, RN7SKP22, CEP89, C19orf40, RHPN2, GPATCH1, WDR88, LRP3, SLC7A10, CEBPA, CEBPG, PEPD, CHST8, KCTD15, RN7SL150P, LSM14A, KIAA0355, GPI, PDCD2L, RN7SL154P, UBA2, WTIP, SCGB1B2P, SCGB2B2, SNORD111.ENSG00000252230.1, ZNF302, ZNF181, ZNF599, LINC00904, ZNF30, ZNF792, GRAMD1A, SCN1B, HPN, FX…
497	20	20p13	20p13	0.0942556	0.106071	-0.0118156	-0.0263897	0.00275845	0.11016	0.160956	NA	NA	C20orf96, DEFB125, DEFB126, DEFB127, DEFB128, DEFB129, DEFB132, NRSN2, RBCK1, SOX12, TBC1D20, TRIB3, ZCCHC3, CSNK2A1, TCF15, SRXN1, SCRT2, SLC52A3, FAM110A, ANGPT4, RSPO4, C20orf202, PSMF1, TMEM74B, RAD21L1, SNPH, SDCBP2, FKBP1A, NSFL1C, SIRPB2, SIRPD, SIRPB1, SIRPG, RN7SL561P, SIRPA, PDYN, STK35, TGM3, TGM6, SNRPB, SNORD119, ZNF343, TMC2, MIR1292, NOP56, SNORA51.ENSG00000271798.1, SNORD110, SNOR…
498	20	20p12.3	20p12.2	0.0881594	0.098395	-0.0102355	-0.0243588	0.00388771	0.154872	0.218986	NA	NA	RN7SL547P, HAO1, TMX4, PLCB1, RNU105B, PLCB4, LAMP5, PAK7, ANKEF1, SNAP25, MKKS, SLX4IP, JAG1, C20orf187
499	20	20p12.2	20p12.1	0.0883939	0.0931612	-0.0047673	-0.0186904	0.00915577	0.517964	0.606791	NA	NA	LINC00687, RN7SKP111, BTBD3, SPTLC3, ISM1, TASP1, ESF1, NDUFAF5, SEL1L2
500	20	20p12.1	20p12.1	0.120985	0.115841	0.00514387	-0.0104144	0.0207021	0.534848	0.61967	NA	NA	MACROD2
501	20	20p12.1	20p11	0.0900352	0.0959525	-0.00591738	-0.0199954	0.00816064	0.421258	0.516507	NA	NA	RN7SL864P, FLRT3
502	20	20p11	20p11	0.0989449	0.100837	-0.0018925	-0.0163909	0.0126059	0.824927	0.876589	NA	NA	RNA5SP475
503	20	20p11.23	20p11.2	0.0876905	0.0865318	0.00115875	-0.0124747	0.0147922	0.898763	0.939859	NA	NA	KIF16B, SNRPB2, OTOR, U3.ENSG00000212165.1, PCSK2
504	20	20p12.1	20p11.1	0.0851114	0.0851361	-2.47065e-05	-0.0132605	0.0132111	1	1	NA	NA	BFSP1, DSTN, RN7SKP69, RRBP1, BANF2, SNX5, OVOL2, SNORD17, MGME1, CSRP2BP, PET117, RN7SL14P, ZNF133, RN7SKP74, RNY4P11, DZANK1, LINC00851, RNA5SP476, POLR3F, MIR3192, RBBP9, SEC23B, LINC00493, DTD1, RN7SL638P, RNU6ATAC34P, LINC00652, C20orf78, SCP2D1, SLC24A3, RIN2, NAA20, CRNKL1, C20orf26, RN7SL690P, INSM1, RALGAPA2, RN7SL607P, LINC00237, PLK1S1, RNA5SP477, XRN2, RN7SKP140, PAX1, LINC00261, FOXA…
505	20	20p11.1	20q11.21	0.0433763	0.042917	0.000459361	-0.00944635	0.0103651	0.972759	0.991611	NA	NA	MIR663A, FRG1B
506	20	20q11.1	20q11.1	0.0344666	0.0359386	-0.001472	-0.0105052	0.00756115	0.790479	0.85029	NA	NA	DEFB115, DEFB116, RNA5SP480, DEFB118, DEFB119, SNORA40.ENSG00000212134.1, DEFB121, DEFB122, DEFB123, DEFB124, REM1, LINC00028, HM13, ID1, MIR3193, COX4I2, BCL2L1, TPX2, MYLK2, FOXS1, DUSP15, TTLL9, PDRG1, XKR7, RNA5SP481, CCM2L, HCK, RNA5SP482, TM9SF4, TSPY26P, PLAGL2, POFUT1, MIR1825, KIF3B, ASXL1, C20orf112, C20orf203, COMMD7, DNMT3B, MAPRE1, EFCAB8, SUN5, BPIFB2, BPIFB6, BPIFB3, BPIFB4, BPIFA2…
507	20	20q12-q13	20q13.2	0.0431419	0.0436148	-0.000472942	-0.010413	0.00946711	0.970599	0.991331	NA	NA	PTPRT, RN7SKP100, RN7SL666P, SCARNA15.ENSG00000252193.1, SRSF6, L3MBTL1, SGK2, IFT52, MYBL2, GTSF1L, TOX2, RN7SL443P, JPH2, OSER1, GDAP1L1, FITM2, R3HDML, HNF4A, MIR3646, C20orf62, TTPAL, SERINC3, PKIG, ADA, WISP2, KCNK15, RIMS4, RN7SL31P, YWHAB, PABPC1L, TOMM34, STK4, KCNS1, WFDC5, WFDC12, PI3, SEMG1, SEMG2, SLPI, MATN4, RBPJL, SDC4, SYS1, TP53TG5, DBNDD2, PIGT, WFDC2, SPINT3, WFDC6, EPPIN, WFDC…
508	20	20q13.2	20q13.2	0.0347011	0.0324494	0.00225165	-0.00654021	0.0110435	0.653391	0.734367	NA	NA	TSHZ2, RN7SKP184, ZNF217, BCAS1, MIR4756, CYP24A1, PFDN4
509	20	20q13.2	20q13.2	0.0405627	0.0359386	0.00462413	-0.00469485	0.0139431	0.352411	0.446046	NA	NA	DOK5, RNU4ATAC7P, CBLN4, RNA5SP487, MC3R, FAM210B, AURKA, CSTF1, CASS4, RTFDC1, snoU13.ENSG00000238294.1, GCNT7, FAM209A, FAM209B, U3.ENSG00000252536.1, TFAP2C, RN7SL170P, BMP7, MIR4325, SPO11, RAE1, MTRNR2L3, RBM38, CTCFL, PCK1, ZBP1, PMEPA1, MIR4532, C20orf85, ANKRD60, PPP4R1L, RAB22A, VAPB, APCDD1L, MGC4294, STX16, NPEPL1, MIR296, MIR298, GNAS, NELFCD, CTSZ, TUBB1, ATP5E, SLMO2, ZNF831, EDN3, …
510	20	20q13.3	20q13.33	0.042204	0.0387299	0.00347405	-0.00610796	0.0130561	0.505438	0.597439	NA	NA	CDH4, MIR1257, TAF4, LSM14B, PSMA7, SS18L1, MTG2, HRH3, OSBPL2, ADRM1, LAMA5, MIR4758, RPS21, CABLES2, RBBP8NL, GATA5, C20orf166, MIR133A2, SLCO4A1, LINC00686, NTSR1, LINC00659, MRGBP, OGFR, COL9A3, TCFL5, DIDO1, GID8, SLC17A9, BHLHE23, LINC00029, HAR1A, HAR1B, YTHDF1, BIRC7, MIR3196, NKAIN4, ARFGAP1, MIR4326, COL20A1, CHRNA4, KCNQ2, EEF1A2, PPDPF, C20orf195, PTK6, SRMS, HELZ2, GMEB2, ABHD16B, AR…
511	21	21q11.2	21q11.2	0.265416	0.21284	0.052576	0.03228	0.0728719	4.70202e-07	1.97795e-06	0.102568	0.428721	ANKRD20A11P, ANKRD30BP2, BAGE2, CYP4F29P, MIR3648, MIR3687, POTED, RN7SL52P, SNORA70.ENSG00000252199.1, TEKT4P2, TPTE, RNA5SP488, LIPI, RBM11, ABCC13, HSPA13, SAMSN1, NRIP1, USP25, snoU13.ENSG00000238591.1
512	21	21q21.1	21q21.1	0.265651	0.20656	0.059091	0.0389151	0.0792669	1.30995e-08	7.74193e-08	0.0454316	0.33195	LINC00478, SNORD74.ENSG00000201025.1, MIR99A, MIRLET7C, MIR125B2
513	21	21q21.1	21q21.1	0.268464	0.211445	0.0570197	0.0367187	0.0773207	4.84851e-08	2.60236e-07	0.0574601	0.344344	C21orf37, RN7SL163P, CXADR, BTG3, C21orf91, CHODL, TMPRSS15, MIR548X
514	21	21q21.1	21q21.1	0.27456	0.215283	0.0592778	0.0388408	0.0797147	1.75693e-08	1.01554e-07	0.0686959	0.367141	RN7SKP147, LINC00320, NCAM2, LINC00317, LINC00308, RN7SL609P
515	21	21q21.1	21q21.1	0.278312	0.21947	0.0588422	0.0382893	0.0793951	2.63528e-08	1.45912e-07	0.129261	0.454727	X7SK.ENSG00000232512.2, RNA5SP489, LINC00158, snoU13.ENSG00000238314.1, MIR155HG, LINC00515, MRPL39, JAM2, ATP5J, GABPA, APP, CYYR1, ADAMTS1, ADAMTS5, MIR4759, LINC00113, LINC00314, LINC00161, N6AMT1, LTN1, RWDD2B, USP16, CCT8, MAP3K7CL, U3.ENSG00000212479.1, BACH1, LINC00189, snoU13.ENSG00000239171.1, GRIK1, CLDN17, LINC00307, CLDN8, MIR4327
516	21	21q22.11	21q22.12	0.272685	0.21284	0.0598444	0.039473	0.0802158	1.16673e-08	7.05401e-08	0.0575851	0.344344	TIAM1, SOD1, SCAF4, SNORA81.ENSG00000238390.1, HUNK, LINC00159, MIS18A, MRAP, URB1, RN7SL109P, SNORA80, C21orf119, EVA1C, SNORA33.ENSG00000252045.1, RNA5SP490, LINC00846, TCP10L, C21ORF59, C21orf59, SYNJ1, PAXBP1, C21orf49, C21orf62, SNORA70.ENSG00000207098.1, OLIG2, LINC00945, OLIG1, C21orf54, IFNAR2, IL10RB, IFNAR1, IFNGR2, TMEM50B, DNAJC28, GART, SON, DONSON, CRYZL1, ITSN1, ATP5O, LINC00649, R…
517	21	21q22.3	21q22.3	0.271981	0.20656	0.0654216	0.0451795	0.0856637	3.75796e-10	3.04106e-09	0.044611	0.33195	RUNX1
518	21	21q22.12	21q22.3	0.298476	0.229588	0.0688877	0.0479641	0.0898112	1.64646e-10	1.39684e-09	0.0743441	0.367141	MIR802, FKSG68, SETD4, CBR1, CBR3, DOPEY2, RN7SL73P, snoU13.ENSG00000238851.1, MORC3, CHAF1B, CLDN14, SIM2, HLCS, RNA5SP491, RIPPLY3, PIGP, TTC3, DSCR9, RN7SL678P, DSCR3, DYRK1A, KCNJ6, DSCR4, DSCR8, KCNJ15, snoU13.ENSG00000238581.1, DSCR10, ERG, LINC00114, ETS2, SNORA62.ENSG00000272015.1, PSMG1, BRWD1, HMGN1, snoU13.ENSG00000238556.1, WRB, LCA5L, SH3BGR, B3GALT5, C21orf88, IGSF5, PCP4, DSCAM, MI…
519	22	22q11.1	22q11.21	0.230012	0.23238	-0.0023679	-0.0226248	0.017889	0.838384	0.887303	NA	NA	CCT8L2, HSFY1P1, KCNMB3P1, OR11H1, POTEH, TPTEP1, XKR3, GAB4, CECR7, IL17RA, CECR6, CECR5, CECR1, CECR3, CECR9, RN7SL843P, CECR2, SLC25A18, ATP6V1E1, BCL2L13, snoU13.ENSG00000251737.1, BID, LINC00528, MICAL3, MIR648
520	22	22q11.21	22q11.21	0.221336	0.230286	-0.00894965	-0.0290609	0.0111616	0.390615	0.484584	NA	NA	PEX26, TUBA8, AIFM3, ARVCF, BCRP2, C22orf29, C22orf39, CCDC116, CDC45, CLDN5, CLTCL1, COMT, CRKL, DGCR14, DGCR2, DGCR5, DGCR6L, DGCR6, DGCR8, FAM230A, FAM230B, FAM230C, GGT2, GGT3P, GGTLC3, GNB1L, GP1BB, GSC2, HIC2, HIRA, KLHL22, LZTR1, MED15, MIR1286, MIR1306, MIR130B, MIR185, MIR301B, MIR3618, MIR4761, MIR649, MRPL40, P2RX6P, P2RX6, PI4KAP1, PI4KAP2, PI4KA, POM121L4P, POM121L7, PPIL2, PRODH, RA…
521	22	22q11.21	22q11.21	0.220399	0.233426	-0.0130278	-0.033184	0.00712848	0.207133	0.279365	NA	NA	MAPK1, RNA5SP493, PPM1F, BCR, CES5AP1, GGTLC2, GNAZ, IGLC1, IGLC2, IGLC3, IGLC7, IGLJ1, IGLJ2, IGLJ3, IGLJ4, IGLJ5, IGLJ6, IGLJ7, IGLL5, MIR650, POM121L1P, PRAMEF24P, PRAME, RAB36, RN7SL263P, RTDR1, TOP3B, VPREB1, ZDHHC8P1, ZNF280A, ZNF280B, snoU13.ENSG00000239066.1
522	22	22q11.2	22q12.1	0.231419	0.241452	-0.010033	-0.0304664	0.0104005	0.341821	0.434294	NA	NA	C22orf43, GUSBP11, IGLL1, RGL4, VPREB3, ZNF70, C22orf15, CHCHD10, MMP11, SMARCB1, DERL3, SLC2A11, RN7SL268P, MIF, CABIN1, DDTL, DDT, GSTT1, GSTT2B, GSTT2, GSTTP2, SUSD2, GGT5, POM121L9P, SPECC1L, ADORA2A, UPB1, GUCD1, SNRPD3, FAM211B, GGT1, PIWIL3, SGSM1, SNORD56.ENSG00000199783.1, TMEM211, KIAA1671, CRYBB3, CRYBB2, ADRBK2, CRYBB2P1, LRP5L, RNA5SP494, MYO18B, RN7SKP169, SEZ6L, RNA5SP495, ASPHD2, …
523	22	22q12.1	22q12.3	0.245721	0.255059	-0.00933833	-0.0301632	0.0114865	0.386713	0.481842	NA	NA	MN1, PITPNB, TTC28, RN7SL757P, SNORD42.ENSG00000201209.1, RN7SL162P, CHEK2, HSCB, CCDC117, XBP1, ZNRF3, C22orf31, KREMEN1, EMID1, RHBDD3, EWSR1, GAS2L1, RASL10A, AP1B1, SNORD125, RFPL1S, RFPL1, NEFH, THOC5, NIPSNAP1, NF2, CABP7, ZMAT5, UQCR10, ASCC2, MTMR3, HORMAD2, LIF, MGC20647, OSM, GATSL3, TBC1D10A, SF3A1, CCDC157, RNF215, SEC14L2, KIAA1658, MTFP1, SEC14L3, SEC14L4, SEC14L6, GAL3ST1, PES1, TC…
524	22	22q12.3	22q12.3	0.240094	0.247383	-0.00728933	-0.0279252	0.0133465	0.499375	0.592937	NA	NA	LARGE, MIR4764, SNORA76.ENSG00000253007.2
525	22	22q12.3	22q13.31	0.277843	0.278786	-0.000942857	-0.0224529	0.0205672	0.952027	0.979973	NA	NA	ISX, HMGXB4, TOM1, MIR3909, HMOX1, MCM5, RASD2, APOL6, MB, APOL5, RBFOX2, APOL3, APOL4, APOL1, APOL2, MYH9, RN7SL349P, TXN2, FOXRED2, EIF3D, CACNG2, IFT27, PVALB, NCF4, CSF2RB, snoU13.ENSG00000239056.1, TEX33, TST, MPST, KCTD17, RN7SKP214, TMPRSS6, IL2RB, C1QTNF6, SSTR3, RAC2, CYTH4, ELFN2, MFNG, CARD10, CDC42EP1, LGALS2, GGA1, SH3BP1, PDXP, RN7SL385P, LGALS1, NOL12, TRIOBP, snoU13.ENSG0000023856…
526	22	22q13.31	22q13.33	0.273388	0.273203	0.000184972	-0.0210966	0.0214665	1	1	NA	NA	MIR3201, FAM19A5, MIR4535, ACR, ADM2, ALG12, ARSA, BRD1, C22orf34, CHKB, CPT1B, CRELD2, DENND6B, HDAC10, IL17REL, KLHDC7B, LMF2, MAPK11, MAPK12, MAPK8IP2, MIOX, MIR3667, MLC1, MOV10L1, NCAPH2, ODF3B, PANX2, PIM3, PLXNB2, PPP6R2, RABL2B, RN7SKP252, RN7SL500P, SBF1, SCO2, SHANK3, SYCE3, TRABD, TTLL8, TUBGCP6, TYMP, ZBED4

## Sheet: LAML
Bin Information				Proportion		ΔProportion	Confidence Interval		p/q-values
Bin Number	Chromosome	Start Location	End Location	Male	Female	Male - Female	Lower	Upper	Prop test p-value	Prop test q-value	MLR p-value	MLR q-value	Genes in Bin
1	1	1p36.33	1p36.33	0.00961538	0.0116279	-0.00201252	-0.0334377	0.0294127	1	1	NA	NA	ACAP3, ACTRT2, AGRN, ANKRD65, ATAD3A, ATAD3B, ATAD3C, AURKAIP1, B3GALT6, C1orf159, C1orf170, C1orf222, C1orf233, C1orf86, CALML6, CCNL2, CDK11A, CDK11B, CPSF3L, DDX11L1, DVL1, FAM132A, FAM138A, FAM213B, FAM41C, FAM87B, GABRD, GLTPD1, GNB1, HES4, HES5, ISG15, KLHL17, LINC00115, LINC00982, MIB2, MIR200A, MIR200B, MIR429, MMEL1, MMP23B, MORN1, MRPL20, MXRA8, NADK, NOC2L, OR4F16, OR4F29, OR4F5, PANK4…
2	1	1p36.3	1p36.3	0.00961538	0	0.00961538	-0.018755	0.0379858	1	1	NA	NA	ARHGEF16, MEGF6, MIR551A, TPRG1L, WRAP73, TP73
3	1	1p36.32	1p36.22	0.0192308	0	0.0192308	-0.0177854	0.0562469	0.562743	1	NA	NA	CCDC27, SMIM1, LRRC47, RN7SL574P, CEP104, DFFB, C1orf174, AJAP1, MIR4417, MIR4689, NPHP4, KCNAB2, CHD5, RPL22, RNF207, ICMT, LINC00337, GPR153, HES3, ACOT7, HES2, ESPN, MIR4252, PLEKHG5, TNFRSF25, NOL9, TAS1R1, ZBTB48, KLHL21, PHF13, THAP3, DNAJC11, snoU13.ENSG00000239166.1, CAMTA1, VAMP3, PER3, UTS2, TNFRSF9, PARK7, ERRFI1, RN7SL729P, SLC45A1, RERE, SNORA77.ENSG00000221083.1, ENO1, CA6, RN7SL451…
4	1	1p36.22	1p36.22	0.00961538	0	0.00961538	-0.018755	0.0379858	1	1	NA	NA	TARDBP, MASP2, SRM, EXOSC10
5	1	1p36.2	1p36.2	0.0192308	0	0.0192308	-0.0177854	0.0562469	0.562743	1	NA	NA	MTOR
6	1	1p36.2	1p36.22	0.00961538	0	0.00961538	-0.018755	0.0379858	1	1	NA	NA	snoU13.ENSG00000271794.1, ANGPTL7, UBIAD1, PTCHD2, FBXO2, FBXO44, FBXO6, MAD2L2, DRAXIN, AGTRAP, C1orf167, MTHFR, CLCN6, NPPA, NPPB, KIAA2013, PLOD1, MFN2, MIIP, RN7SL649P, TNFRSF8, TNFRSF1B, MIR4632, SNORA70.ENSG00000252969.1
7	1	1p36.22	1p36.22	0.00961538	0.0116279	-0.00201252	-0.0334377	0.0294127	1	1	NA	NA	VPS13D
8	1	1p36.21	1p36.21	0.00961538	0	0.00961538	-0.018755	0.0379858	1	1	NA	NA	SNORA59A, DHRS3, RNU6ATAC18P, AADACL4, AADACL3, snoU13.ENSG00000238771.1, C1orf158, HNRNPCL1, PRAMEF10, PRAMEF11, PRAMEF12, PRAMEF13, PRAMEF14, PRAMEF15, PRAMEF16, PRAMEF17, PRAMEF18, PRAMEF19, PRAMEF1, PRAMEF21, PRAMEF22, PRAMEF2, PRAMEF3, PRAMEF4, PRAMEF5, PRAMEF6, PRAMEF7, PRAMEF8, PRAMEF9, PRAMEF20, LRRC38, PDPN, RNA5SP41, SCARNA11.ENSG00000253085.1, PRDM2
9	1	1p36.21	1p36.21	0.0192308	0	0.0192308	-0.0177854	0.0562469	0.562743	1	NA	NA	KAZN
10	1	1p36.21	1p36.21	0.0192308	0	0.0192308	-0.0177854	0.0562469	0.562743	1	NA	NA	TMEM51, C1orf195
11	1	1p36.21	1p36.1-p35	0.00961538	0	0.00961538	-0.018755	0.0379858	1	1	NA	NA	FHAD1, EFHD2, CTRC, CELA2A, CELA2B, CASP9, DNAJC16, SCARNA21.ENSG00000251866.1, AGMAT, DDI2, RSC1A1, PLEKHM2, FBLIM1, SLC25A34, TMEM82, SPEN, snoU13.ENSG00000238818.1, ZBTB17, C1orf64, HSPB7, CLCNKA, CLCNKB, FAM131C, EPHA2, ARHGEF19, ANO7P1, C1orf134, RSG1, FBXO42, SZRD1, SPATA21, NECAP2, CROCCP3, ATP13A2, CROCCP2, CROCC, ESPNP, MFAP2, MIR3675, MST1L, NBPF1, U1.ENSG00000228549.2, U1.ENSG000002334…
12	1	1p36.13	1p36.12	0.0192308	0	0.0192308	-0.0177854	0.0562469	0.562743	1	NA	NA	PADI2, PADI1, PADI3, MIR3972, PADI4, PADI6, RCC2, snoU13.ENSG00000239020.1, ARHGEF10L, ACTL8, IGSF21, KLHDC7A, PAX7, TAS1R2, ALDH4A1, MIR4695, MIR1290, IFFO2, UBR4, EMC1, MRTO4, AKR7A3, AKR7L, AKR7A2, PQLC2, RN7SL85P, CAPZB, RN7SL277P, snoU13.ENSG00000239027.1, MINOS1, NBL1, HTR6, TMCO4, RNF186, OTUD3, PLA2G2E, PLA2G2A, RN7SL304P, PLA2G5, PLA2G2D, PLA2G2F, PLA2G2C, UBXN10, VWA5B1, CAMK2N1, MUL1
13	1	1p36.12	1p36.12	0.00961538	0	0.00961538	-0.018755	0.0379858	1	1	NA	NA	FAM43B, CDA, PINK1, DDOST, KIF17, SH2D5, HP1BP3
14	1	1p36.12	1p36.1	0.0192308	0	0.0192308	-0.0177854	0.0562469	0.562743	1	NA	NA	EIF4G3, MIR1256
15	1	1p36.1	1p35.3	0.00961538	0	0.00961538	-0.018755	0.0379858	1	1	NA	NA	ECE1, NBPF3, ALPL, RAP1GAP, USP48, LDLRAD2, HSPG2, CDC42, CELA3A, CELA3B, LINC00339, RN7SL186P, RN7SL386P, RN7SL421P, RN7SL768P, WNT4, MIR4418, ZBTB40, EPHA8, C1QA, C1QC, C1QB, EPHB2, MIR4684, MIR4253, LACTBL1, C1orf234, KDM1A, MIR3115, MIR4419A, LUZP1, HTR1D, HNRNPR, ZNF436, C1orf213, TCEA3, ASAP3, E2F2, ID3, MDS2, RPL11, RN7SL532P, TCEB3, PITHD1, GALE, HMGCL, LYPLA2, FUCA1, CNR2, RN7SL24P, snoU…
16	1	1p34	1p34.1	0	0	0	0	0	NA	NA	NA	NA	LAPTM5, MATN1, MIR4420, RN7SKP91, SDC3, PUM1, SNORD103A, SNORD103B, SNORD85, NKAIN1, SNRNP40, ZCCHC17, FABP3, SERINC2, TINAGL1, HCRTR1, PEF1, COL16A1, BAI2, MIR4254, SPOCD1, PTP4A2, KHDRBS1, TMEM39B, MIR5585, KPNA6, TXLNA, CCDC28B, IQCC, DCDC2B, TMEM234, EIF3I, MTMR9LP, FAM167B, LCK, HDAC1, MARCKSL1, TSSK3, BSDC1, FAM229A, RN7SL122P, ZBTB8B, ZBTB8A, ZBTB8OS, RBBP4, SYNC, KIAA1522, YARS, S100PBP, …
17	1	1p34	1p33	0	0	0	0	0	NA	NA	NA	NA	NSUN4, FAAH, LINC00505, DMBX1, KNCN, MKNK1, MOB3C, ATPAF1, EFCAB14, TEX38, CYP4B1, CYP4Z2P
18	1	1p33	1p33	0	0	0	0	0	NA	NA	NA	NA	CYP4A11
19	1	1p33|1	1p33|1	0	0	0	0	0	NA	NA	NA	NA	CYP4X1
20	1	1p33	1p33	0	0	0	0	0	NA	NA	NA	NA	CYP4Z1
21	1	1p33	1p32.2	0	0	0	0	0	NA	NA	NA	NA	CYP4A22, LINC00853, PDZK1IP1, TAL1, STIL, CMPK1, FOXE3, FOXD2, TRABD2B, SKINTL, SLC5A9, SPATA6, AGBL4, BEND5, snoU13.ENSG00000239144.1, ELAVL4, DMRTA2, FAF1, CDKN2C, MIR4421, C1orf185, snoU13.ENSG00000238618.1, RNF11, TTC39A, EPS15, OSBPL9, SNORA26.ENSG00000212624.1, NRD1, MIR761, RAB3B, RNA5SP48, RN7SL290P, TXNDC12, KTI12, BTF3L4, ZFYVE9, RN7SL788P, CC2D1B, ORC1, PRPF38A, ZCCHC11, snoU13.ENSG000…
22	1	1p32-p31	1p32-p31	0	0.0116279	-0.0116279	-0.0449069	0.0216511	0.923984	1	NA	NA	DAB1
23	1	1p32.2-p32.1	1p31.3	0	0	0	0	0	NA	NA	NA	NA	OMA1, RN7SL713P, TACSTD2, MYSM1, JUN, FGGY, MIR4711, HOOK1, CYP2J2, RN7SL475P, C1orf87, NFIA, TM2D1
24	1	1p31.3	1p31.3	0.00961538	0	0.00961538	-0.018755	0.0379858	1	1	NA	NA	INADL
25	1	1p31.3	1p31.3	0	0	0	0	0	NA	NA	NA	NA	RN7SL180P
26	1	1p31.3	1p31.3	0.00961538	0	0.00961538	-0.018755	0.0379858	1	1	NA	NA	L1TD1, KANK4, USP1, DOCK7
27	1	1p31.3	1p31.3	0	0	0	0	0	NA	NA	NA	NA	ANGPTL3
28	1	1p31.3	1p31.3	0.00961538	0	0.00961538	-0.018755	0.0379858	1	1	NA	NA	ATG4C, LINC00466, RNA5SP49, FOXD3, ALG6, ITGB3BP, EFCAB7, RN7SL488P, DLEU2L, PGM1, RN7SL130P, ROR1, UBE2U, CACHD1, MIR4794, RAVER2
29	1	1p32.3-p31.3	1p32.3-p31.3	0.0192308	0	0.0192308	-0.0177854	0.0562469	0.562743	1	NA	NA	JAK1
30	1	1p32.3-p31.3	1p31.1	0.00961538	0	0.00961538	-0.018755	0.0379858	1	1	NA	NA	MIR3671, AK4, DNAJC6, LEPROT, LEPR, snoU13.ENSG00000238931.1, RN7SL854P, PDE4B, SGIP1, MIR3117, TCTEX1D1, INSL5, WDR78, MIER1, SLC35D1, C1orf141, SNORA31.ENSG00000252433.1, IL23R, RNU4ATAC4P, IL12RB2, SERBP1, RN7SL392P, GADD45A, GNG12, DIRAS3, WLS, MIR1262, RPE65, DEPDC1, LRRC7, RN7SL538P, PIN1P1, LRRC40, RN7SL242P, SRSF11, ANKRD13C, HHLA3
31	1	1p31.1	1p31.1	0.00961538	0.0116279	-0.00201252	-0.0334377	0.0294127	1	1	NA	NA	CTH
32	1	1p31.2	1p31.1	0.00961538	0	0.00961538	-0.018755	0.0379858	1	1	NA	NA	PTGER3, ZRANB2, MIR186
33	1	1p31.1	1p31.1	0.0192308	0	0.0192308	-0.0177854	0.0562469	0.562743	1	NA	NA	NEGR1
34	1	1p31.1	1p31.1	0.00961538	0	0.00961538	-0.018755	0.0379858	1	1	NA	NA	RN7SKP19, RNA5SP50, RNU4ATAC8P, LRRIQ3, FPGT, TNNI3K, LRRC53, C1orf173, CRYZ, TYW3, LHX8, SLC44A5, ACADM, RABGGTB, SNORD45C, SNORD45A, SNORD45B, MSH4, ASB17, ST6GALNAC3, ST6GALNAC5, PIGK, AK5, ZZZ3, RNA5SP20, RN7SL370P, USP33, FAM73A, RNA5SP21, NEXN, FUBP1, DNAJB4, GIPC2, RNA5SP22
35	1	1p31.1	1p31.1	0.0192308	0	0.0192308	-0.0177854	0.0562469	0.562743	1	NA	NA	PTGFR, RNA5SP23
36	1	1p31.1	1p31.1	0.00961538	0	0.00961538	-0.018755	0.0379858	1	1	NA	NA	IFI44L
37	1	1p31.1	1p31.1	0	0	0	0	0	NA	NA	NA	NA	IFI44
38	1	1p31.1	1p31.1	0.00961538	0	0.00961538	-0.018755	0.0379858	1	1	NA	NA	ELTD1, RN7SKP247
39	1	1p31.1	1p22.3	0.0192308	0	0.0192308	-0.0177854	0.0562469	0.562743	1	NA	NA	LPHN2, TTLL7, PRKACB, SNORA2.ENSG00000199959.1, SAMD13, UOX, DNASE2B, RPF1, GNG5, SPATA1, CTBS, C1orf180, SSX2IP, LPAR3
40	1	1p22	1p22.2	0.00961538	0	0.00961538	-0.018755	0.0379858	1	1	NA	NA	MCOLN2, WDR63, MCOLN3, MIR4423, SYDE2, C1orf52, BCL10, DDAH1, CYR61, SNORD81.ENSG00000199934.1, ZNHIT6, COL24A1, RNA5SP51, ODF2L, CLCA2, CLCA1, CLCA4, CLCA3P, SH3GLB1, HS2ST1, LMO4, RNA5SP52, RN7SL583P, PKN2, GTF2B, CCBL2, RBMXL1, GBP3, GBP1, GBP2, GBP7, GBP4, GBP5, GBP6, GBP1P1
41	1	1p22.2	1p21.3	0	0	0	0	0	NA	NA	NA	NA	LRRC8B, LRRC8C, snoU13.ENSG00000239176.1, LRRC8D, RN7SKP272, ZNF326, U3.ENSG00000199666.1, BARHL2, ZNF644, HFM1, CDC7, TGFBR3, RN7SL653P, RN7SL235P, BRDT, EPHX4, BTBD8, KIAA1107, C1orf146, ACTBP12, GLMN, RPAP2, RN7SL824P, GFI1, EVI5, RPL5, SNORD21, SNORA66.ENSG00000251795.1, SNORA66.ENSG00000207523.1, FAM69A, SNORA51.ENSG00000207022.1, RN7SL692P, RN7SKP123, MTF2, TMED5, CCDC18, DR1, FNBP1L, RNA5S…
42	1	1p21.3	1p22-p21	0.00961538	0	0.00961538	-0.018755	0.0379858	1	1	NA	NA	ABCD3, F3
43	1	1p22-p21	1p31	0	0	0	0	0	NA	NA	NA	NA	MIR378G, SLC44A3, CNN3, ALG14, TMEM56, RWDD3, RN7SL831P, RN7SKP270, PTBP2, DPYD, MIR137HG, SNX7, LPPR5, LPPR4, PALMD, FRRS1, AGL, SLC35A3, HIAT1, SASS6, TRMT13, LRRC39, DBT
44	1	1p21.2	1p22	0	0	0	0	0	NA	NA	NA	NA	RTCA, MIR553, CDC14A, GPR88, VCAM1, EXTL2, SLC30A7, DPH5, SCARNA16.ENSG00000252765.1, snoU13.ENSG00000238296.1, S1PR1, OLFM3
45	1	1p21	1p21	0.00961538	0.0116279	-0.00201252	-0.0334377	0.0294127	1	1	NA	NA	COL11A1
46	1	1p21	1p21	0.00961538	0	0.00961538	-0.018755	0.0379858	1	1	NA	NA	RN7SKP285, AMY1A, AMY1B, AMY1C, AMY2A, AMY2B, RNPC3
47	1	1p13.3	1p13.3	0	0	0	0	0	NA	NA	NA	NA	PRMT6, NTNG1
48	1	1p13.3	1p13.1	0	0	0	0	0	NA	NA	NA	NA	VAV3, SLC25A24, NBPF4, SLC25A24P1, NBPF5P, NBPF6, FAM102B, HENMT1, PRPF38B, FNDC7, STXBP3, AKNAD1, SPATA42, GPSM2, CLCC1, WDR47, TAF13, C1orf194, KIAA1324, SCARNA2, TMEM167B, SARS, CELSR2, PSRC1, MYBPHL, SORT1, PSMA5, SYPL2, ATXN7L2, CYB561D1, AMIGO1, GPR61, GNAI3, RNU6V, MIR197, GNAT2, AMPD2, GSTM1, GSTM2, GSTM4, GSTM5, GSTM3, EPS8L3, CSF1, AHCYL1, STRIP1, ALX3, UBL4B, SLC6A17, KCNC4, SNORA25.EN…
49	1	1p13	1p13-p12	0.00961538	0	0.00961538	-0.018755	0.0379858	1	1	NA	NA	KCNA2, KCNA3, CD53, LRIF1, RNA5SP54, DRAM2, CEPT1, DENND2D, CHI3L2, CHIAP2, CHIA, PIFO, PGCP1, OVGP1, WDR77, ATP5F1, C1orf162, ADORA3, RAP1A, FAM212B, DDX20, KCND3, snoU13.ENSG00000239111.1, snoU13.ENSG00000238761.1, CTTNBP2NL, WNT2B, ST7L, CAPZA1, snoU13.ENSG00000238975.1, MOV10, RHOC, PPM1J, FAM19A3, SLC16A1, LRIG2, MAGI3, PHTF1, RSBN1, PTPN22, BCL2L15, AP4B1, DCLRE1B, HIPK1, OLFML3, SYT6, TRIM…
50	1	1p13	1p13.1	0	0	0	0	0	NA	NA	NA	NA	TSHB, TSPAN2, NGF, RN7SL420P, SNORA42.ENSG00000207502.1
51	1	1p13.1	1p12	0.00961538	0	0.00961538	-0.018755	0.0379858	1	1	NA	NA	VANGL1, CASQ2, NHLH2, SLC22A15, MAB21L3, U3.ENSG00000221040.1, ATP1A1, ATP1A1OS, CD58, MIR548AC, IGSF3, MIR320B1, C1orf137, CD2, PTGFRN, RNA5SP55, CD101, TTF2, MIR942, TRIM45, VTCN1, MAN1A2, FAM46C, SNORA40.ENSG00000212266.1
52	1	1p12	1q23	0	0	0	0	0	NA	NA	NA	NA	GDAP2, WDR3, SPAG17, RNA5SP56, TBX15, WARS2, snoU13.ENSG00000238679.1, HAO2, HSD3B2, HSD3B1, LINC00622, ZNF697, PHGDH, HMGCS2, REG4, ADAM30, NOTCH2, ACP6, ANKRD20A12P, ANKRD34A, ANKRD35, BCL9, BOLA1, CD160, CHD1L, FAM72B, FAM72C, FAM72D, FCGR1A, FCGR1B, FCGR1C, FMO5, GJA5, GJA8, GNRHR2, GPR89A, GPR89B, GPR89C, HFE2, HIST2H2AA3, HIST2H2AA4, HIST2H2AB, HIST2H2AC, HIST2H2BA, HIST2H2BE, HIST2H2BF, HI…
53	1	1q23	1q23	0.00961538	0	0.00961538	-0.018755	0.0379858	1	1	NA	NA	PBX1
54	1	1q23	1q25.1	0	0	0	0	0	NA	NA	NA	NA	SNORD112.ENSG00000252359.1, LMX1A, RXRG, LRRC52, MGST3, ALDH9A1, TMCO1, UCK2, RNA5SP64, FAM78B, MIR921, FMO9P, POGK, TADA1, ILDR2, MAEL, RNA5SP65, snoU13.ENSG00000238325.1, GPA33, DUSP27, POU2F1, CD247, CREG1, RCSD1, MPZL1, ADCY10, MPC2, DCAF6, MIR1255B2, GPR161, TIPRL, SFT2D2, ANKRD36BP1, TBX19, MIR557, XCL2, XCL1, DPT, LINC00626, LINC00970, RNA5SP66, ATP1B1, NME7, BLZF1, CCDC181, SLC19A2, F5, S…
55	1	1q23-q24	1q23-q24	0	0	0	0	0	NA	NA	NA	NA	TNN
56	1	1q24-q25	1q24	0	0	0	0	0	NA	NA	NA	NA	KIAA0040, TNR, RFWD2, SCARNA3, PAPPA2, ASTN1, MIR488, FAM5B, SEC16B, RASAL2, LINC00083, TEX35, C1ORF220, C1orf220, RNA5SP69, MIR4424, RALGPS2, SNORA63.ENSG00000201791.1, ANGPTL1, FAM20B, TOR3A, ABL2, SNORA67.ENSG00000201619.1, SNORA67.ENSG00000212338.1, SOAT1, AXDND1, RN7SL374P, NPHS2, TDRD5, FAM163A, TOR1AIP2, IFRG15, TOR1AIP1, RN7SL230P, CEP350, QSOX1
57	1	1q25.2	1q25.2	0	0	0	0	0	NA	NA	NA	NA	LHX4
58	1	1q25.1	1q25.1	0	0	0	0	0	NA	NA	NA	NA	ACBD6, MIR3121
59	1	1q25.1	1q25.1	0	0	0	0	0	NA	NA	NA	NA	XPR1, U6.ENSG00000272292.1, KIAA1614, STX6, MR1, IER5, CACNA1E, RNA5SP70, RN7SKP229, ZNF648, GLUL, TEDDM1, LINC00272, RGSL1, RNASEL, RGS16, RGS8, NPL, DHX9, SHCBP1L, RNA5SP71, LAMC1, LAMC2, NMNAT2, SMG7, NCF2, ARPC5, RGL1, APOBEC4, COLGALT2, TSEN15, RN7SL654P, C1orf21, SNORD112.ENSG00000252790.1, EDEM3, FAM129A, RNA5SP72, RNF2, TRMT1L, SWT1, IVNS1ABP, HMCN1, PRG4, TPR, C1orf27, OCLM, PDC, PTGS2, …
60	1	1q31.1	1q31.1	0.00961538	0	0.00961538	-0.018755	0.0379858	1	1	NA	NA	FAM5C
61	1	1q31.2	1q31.2	0	0	0	0	0	NA	NA	NA	NA	RGS18, RGS21, RGS1, RGS13, RGS2, RN7SKP126, UCHL5, snoU109.ENSG00000238754.1, TROVE2, GLRX2
62	1	1q25	1q25	0.00961538	0	0.00961538	-0.018755	0.0379858	1	1	NA	NA	CDC73
63	1	1q25	1q31	0	0	0	0	0	NA	NA	NA	NA	MIR1278
64	1	1q31	1q32	0.00961538	0	0.00961538	-0.018755	0.0379858	1	1	NA	NA	B3GALT2, U3.ENSG00000252241.1, KCNT2, MIR4735, CFH, CFHR1, CFHR2, CFHR3, CFHR4
65	1	1q31.3	1q31.3	0.00961538	0.0116279	-0.00201252	-0.0334377	0.0294127	1	1	NA	NA	CFHR5
66	1	1q31-q32.1	1q32.1	0.00961538	0	0.00961538	-0.018755	0.0379858	1	1	NA	NA	F13B, ASPM, ZBTB41, CRB1, DENND1B, C1orf53, LHX9, NEK7, ATP6V1G3, PTPRC, MIR181A1HG, MIR181A1, MIR181B1, NR5A2
67	1	1q32.1	1q41	0	0	0	0	0	NA	NA	NA	NA	LINC00862, ZNF281, KIF14, DDX59, CAMSAP2, GPR25, C1orf106, KIF21B, CACNA1S, ASCL5, TMEM9, IGFN1, PKP1, TNNT2, LAD1, TNNI1, PHLDA3, CSRP1, RPS10P7, NAV1, MIR5191, MIR1231, IPO9, SHISA4, LMOD1, TIMM17A, SNORA70.ENSG00000206637.1, RNPEP, ELF3, GPR37L1, ARL8A, PTPN7, PTPRVP, LGR6, snoU13.ENSG00000238571.1, snoU13.ENSG00000239046.1, UBE2T, PPP1R12B, U6.ENSG00000272262.1, SNORA70.ENSG00000253042.1, SYT…
68	1	1q41	1q41	0.00961538	0	0.00961538	-0.018755	0.0379858	1	1	NA	NA	GPATCH2
69	1	1q41	1q41	0	0	0	0	0	NA	NA	NA	NA	SPATA17, LINC00210, RRP15, TGFB2, C1orf143, U3.ENSG00000212610.1, LYPLAL1, SLC30A10, RNA5SP76, U3.ENSG00000221673.1, EPRS, snoU13.ENSG00000238798.1, BPNT1, IARS2, MIR215, snoU13.ENSG00000238576.1, RAB3GAP2, SNORA36B, MARK1, RN7SL464P, HDAC1P2, C1orf115, MARC2, MARC1, RNU6ATAC35P, HLX
70	1	1q41	1q41	0.00961538	0.0116279	-0.00201252	-0.0334377	0.0294127	1	1	NA	NA	DUSP10
71	1	1q41	1q41	0.00961538	0	0.00961538	-0.018755	0.0379858	1	1	NA	NA	HHIPL2, TAF1A, MIA3, AIDA, BROX, RN7SL276P, FAM177B, DISP1, snoU13.ENSG00000239054.1, TLR5, SUSD4, C1orf65, CAPN8, CAPN2, TP53BP2, RN7SKP49, FBXO28, DEGS1, SNORA72.ENSG00000201898.1
72	1	1q41-q42.2	1q42	0	0	0	0	0	NA	NA	NA	NA	NVL, MIR320B2, snoU13.ENSG00000238856.1, CNIH4, WDR26, MIR4742, CNIH3, DNAH14, LBR, ENAH, SRP9, EPHX1, TMEM63A, LEFTY1, PYCR2, LEFTY2, SDE2, H3F3A, ACBD3, MIXL1, LIN9, snoU13.ENSG00000238545.1, snoU13.ENSG00000239094.1, PARP1, RN7SKP165, C1orf95, ITPKB, PSEN2, ADCK3, CDC42BPA, RNA5SP77, ZNF678, JMJD4, SNAP47, PRSS38, WNT9A, MIR5008, WNT3A, ARF1, MIR3620, C1orf35, MRPL55, GJC2, GUK1, C1orf148, IBA…
73	1	1q42.11-q42.3	1q42.11-q42.3	0	0	0	0	0	NA	NA	NA	NA	RHOU
74	1	1q42.13	1q42.3	0	0	0	0	0	NA	NA	NA	NA	TMEM78, RAB4A, SPHAR, CCSAP, RN7SKP276, ACTA1, NUP133, ABCB10, RNA5SP78, TAF5L, URB2, GALNT2, PGBD5, COG2, AGT, RN7SL467P, CAPN9, RNA5SP79, C1orf198, RN7SL837P, snoU13.ENSG00000238985.1, TTC13, ARV1, FAM89A, MIR1182, TRIM67, C1orf131, GNPAT, RNA5SP80, EXOC8, SPRTN, EGLN1, TRAX, TSNAX, DISC1, LINC00582, RN7SL299P, SIPA1L2, MAP10, NTPCR, PCNXL2, MLK4, KCNK1, MIR4427, SLC35F3, MIR4671, COA6, TARBP1,…
75	1	1q43	1q43	0	0	0	0	0	NA	NA	NA	NA	LGALS8, HEATR1
76	1	1q42-q43	1q43	0	0	0	0	0	NA	NA	NA	NA	ACTN2, MTR
77	1	1q43	1q43	0	0	0	0	0	NA	NA	NA	NA	MT1HL1, RYR2
78	1	1q43	1q43	0	0	0	0	0	NA	NA	NA	NA	RN7SKP195, MIR4428, SNORA25.ENSG00000252290.1, ZP4, MTRNR2L11, CHRM3, FMN2
79	1	1q43	1q43	0.00961538	0	0.00961538	-0.018755	0.0379858	1	1	NA	NA	GREM2
80	1	1q43|1q23.1	1q43|1q23.1	0.00961538	0.0116279	-0.00201252	-0.0334377	0.0294127	1	1	NA	NA	RGS7
81	1	1q43|1q23.1	1q44	0.00961538	0	0.00961538	-0.018755	0.0379858	1	1	NA	NA	MIR3123, FH, KMO, OPN3, CHML, WDR64, EXO1, MAP1LC3C, PLD5, RNA5SP81, RN7SKP12, CEP170
82	1	1q43	1q44	0	0	0	0	0	NA	NA	NA	NA	SDCCAG8, MIR4677, AKT3, ZBTB18, RN7SL148P, C1orf100, ADSS, C1orf101, DESI2, COX20, HNRNPU, RN7SKP55, EFCAB2, KIF26B, SMYD3, AHCTF1, CNST, SCCPDH, SNORA25.ENSG00000252011.1, SNORD112.ENSG00000252495.1, TFB2M, ZNF670, ZNF695, ZNF669, C1orf229, ZNF124, MIR3916, RNA5SP82, ZNF496, NLRP3, OR2B11, OR2W5, GCSAML, OR2C3, OR2G2, OR2G3, LYPD8, MIR3124, OR11L1, OR13G1, OR14A16, OR14A2, OR14C36, OR14I1, OR14K…
83	2	2p25	2p25	0.00961538	0	0.00961538	-0.018755	0.0379858	1	1	NA	NA	ACP1, FAM110C, FAM150B, SH3YL1, TMEM18, MYT1L, PXDN, SNTG2, TPO
84	2	2p25	2p25.2	0	0	0	0	0	NA	NA	NA	NA	snoU13.ENSG00000238722.1, TSSC1, TRAPPC12, ADI1, RNASEH1, RPS7, SNORA73.ENSG00000252531.1, COLEC11, ALLC, DCDC2C, RN7SL531P, SNORA31.ENSG00000252238.1, SOX11, FLJ30594, LINC00487
85	2	2p25.2	2p25.2	0	0.0116279	-0.0116279	-0.0449069	0.0216511	0.923984	1	NA	NA	CMPK2
86	2	2p25.2	2p23.3	0	0	0	0	0	NA	NA	NA	NA	RSAD2, RNF144A, RN7SKP112, RNU6ATAC37P, LINC00299, ID2, KIDINS220, MBOAT2, snoU13.ENSG00000238888.1, ASAP2, ITGB1BP1, CPSF3, IAH1, ADAM17, snoU13.ENSG00000238462.1, YWHAQ, TAF1B, GRHL1, KLF11, CYS1, SNORA26.ENSG00000212558.1, RRM2, C2orf48, SNORA2.ENSG00000206647.1, MIR4261, RN7SL66P, SNORA51.ENSG00000206898.1, HPCAL1, ODC1, SNORA80B, NOL10, RN7SL832P, ATP6V1C2, PDIA6, KCNF1, C2orf50, PQLC3, ROCK…
87	2	2p23.3	2p23.3	0	0.0116279	-0.0116279	-0.0449069	0.0216511	0.923984	1	NA	NA	ITSN2
88	2	2p23.3	2p23	0	0	0	0	0	NA	NA	NA	NA	SCARNA21.ENSG00000251805.1
89	2	2p23	2p24.1	0	0.0116279	-0.0116279	-0.0449069	0.0216511	0.923984	1	NA	NA	NCOA1, RNA5SP88, PTRHD1, CENPO, ADCY3, DNAJC27, SNORD14, EFR3B, RN7SL856P, POMC, DNMT3A, MIR1301, DTNB, ASXL2
90	2	2p23	2p23	0	0	0	0	0	NA	NA	NA	NA	KIF3C, RAB10, GAREML, HADHA, HADHB
91	2	2p23.3	2p23.3	0.00961538	0	0.00961538	-0.018755	0.0379858	1	1	NA	NA	EPT1, GPR113
92	2	2p23.3	2p22.1	0	0	0	0	0	NA	NA	NA	NA	DRC1, OTOF, C2orf70, CIB4, KCNK3, CENPA, SLC35F6, DPYSL5, MAPRE3, TMEM214, AGBL5, OST4, EMILIN1, KHK, CGREF1, ABHD1, PREB, C2orf53, TCF23, SLC5A6, ATRAID, CAD, SLC30A3, DNAJC5G, TRIM54, MPV17, UCN, GTF3C2, EIF2B4, SNX17, ZNF513, PPM1G, NRBP1, IFT172, KRTCAP3, FNDC4, GCKR, C2orf16, ZNF512, CCDC121, GPN1, SNORA36.ENSG00000206731.1, SUPT7L, SLC4A1AP, MRPL33, RBKS, BRE, MIR4263, FOSL2, PLB1, RNA5SP89…
93	2	2p22.1	2p22.1	0	0	0	0	0	NA	NA	NA	NA	GEMIN6
94	2	2p22.1	2p21	0	0	0	0	0	NA	NA	NA	NA	SRSF7, DHX57, MORN2, ARHGEF33, RN7SL96P, SOS1, CDKL4, MAP4K3, SNORA67.ENSG00000252473.1, TMEM178A, THUMPD2, SLC8A1, HNRNPA1P57, snoZ247, C2orf91, PKDCC, EML4, COX7A2L, KCNG3, SNORD75.ENSG00000221300.1, MTA3, OXER1, HAAO, THADA, ZFP36L2, PLEKHH2, RN7SKP66, DYNC2LI1, ABCG5, ABCG8, LRPPRC, PPM1B, snoU13.ENSG00000239052.1, SLC3A1, PREPL
95	2	2p21	2p21	0.00961538	0	0.00961538	-0.018755	0.0379858	1	1	NA	NA	CAMKMT
96	2	2p21	2p14	0	0	0	0	0	NA	NA	NA	NA	SIX3, SIX2, SRBD1, RN7SL414P, PRKCE, EPAS1, TMEM247, RN7SL817P, ATP6V1E2, RHOQ, PIGF, CRIPT, SOCS5, MCFD2, TTC7A, CALM2, C2orf61, BCYRN1, EPCAM, RN7SKP119, MIR559, MSH2, KCNK12, MSH6, FBXO11, RN7SKP224, FOXN2, PPP1R21, STON1, GTF2A1L, LHCGR, FSHR, SNORA75.ENSG00000212580.1, NRXN1, MIR4431, SCARNA16.ENSG00000251942.1, ASB3, CHAC2, ERLEC1, snoU13.ENSG00000238756.1, MIR3682, GPR75, PSME4, ACYP2, C2o…
97	2	2p13.3	2p13.3	0	0	0	0	0	NA	NA	NA	NA	PLEK
98	2	2p13.3	2p12	0	0	0	0	0	NA	NA	NA	NA	APLF, ARHGAP25, FBXO48, PROKR1, BMP10, GKN2, GKN1, ANTXR1, MIR3126, RNA5SP96, GFPT1, NFU1, AAK1, RN7SL604P, SNORA36C, ANXA4, snoU13.ENSG00000238708.1, GMCL1, SNRNP27, MXD1, snoU13.ENSG00000238465.1, snoU13.ENSG00000239072.1, ASPRV1, RN7SL470P, PCBP1, C2orf42, TIA1, PCYOX1, SNRPG, FAM136A, TGFA, ADD2, FIGLA, CLEC4F, CD207, VAX2, ATP6V1B1, snoU13.ENSG00000239064.1, RN7SL160P, ANKRD53, TEX261, NAGK,…
99	2	2p12	2p12	0.00961538	0	0.00961538	-0.018755	0.0379858	1	1	NA	NA	RNA5SP99
100	2	2p12	2p11.1	0	0	0	0	0	NA	NA	NA	NA	RN7SL201P, SNORD112.ENSG00000252298.1, FUNDC2P2, SUCLG1, DNAH6, TRABD2A, TMSB10, KCMF1, TCF7L1, TGOLN2, RETSAT, ELMOD3, RN7SL113P, CAPG, SH2D6, RN7SL251P, RN7SL830P, MAT2A, GGCX, VAMP8, RN7SL126P, VAMP5, RNF181, C2orf68, TMEM150A, USP39, SFTPB, GNLY, ATOH8, RN7SKP83, ST3GAL5, POLR1A, IMMT, MIR4779, MRPL35, PTCD3, REEP1, SNORD94, U8.ENSG00000202537.1, SNORA19.ENSG00000251974.1, KDM3A, CHMP3, RNF10…
101	2	2q11.1	2q12.2	0	0	0	0	0	NA	NA	NA	NA	ANKRD20A8P, TEKT4, RN7SL575P, MAL, MRPS5, ZNF514, ZNF2, PROM2, KCNIP3, FAHD2A, FLJ14082, LINC00342, TRIM43, ANKRD36C, FAHD2CP, RN7SL210P, GPAT2, ADRA2B, ASTL, DUSP2, STARD7, TMEM127, CIAO1, SNRNP200, ITPRIPL1, NCAPH, NEURL3, ARID5A, KANSL3, FER1L5, LMAN2L, CNNM4, MIR3127, CNNM3, ANKRD23, ANKRD39, SEMA4C, FAM178B, RNA5SP101, snoU13.ENSG00000238760.1, ACTR1B, ANKRD36B, ANKRD36, COX5B, FAHD2B, RN7SL…
102	2	2q12	2q12	0	0	0	0	0	NA	NA	NA	NA	NCK2
103	2	2q12.2	2q11.2-q12.1	0	0	0	0	0	NA	NA	NA	NA	C2orf40, UXS1, PLGLA, RGPD3, CD8BP, ST6GAL2
104	2	2q11.2-q12.1	2q12.3	0	0.0116279	-0.0116279	-0.0449069	0.0216511	0.923984	1	NA	NA	GACAT1
105	2	2q12.3	2q12.3	0	0	0	0	0	NA	NA	NA	NA	RGPD4, SLC5A7, SULT1C3, SULT1C2, SULT1C2P1, SULT1C4, GCC2, LIMS1, RANBP2, CCDC138, EDAR, SH3RF3, MIR4265, MIR4266, SEPT10, SOWAHC, BUB1, LIMS3L, LIMS3.ENSG00000256977.6, LIMS3.ENSG00000257207.4, LINC00116, MALL, MIR4267, MIR4436B1, MIR4436B2, NPHP1, RGPD5, RGPD6, ACOXL, BCL2L11, ANAPC1, MERTK, RN7SL297P, TMEM87B, FBLN7, ZC3H8, snoU13.ENSG00000238951.1, ZC3H6, RGPD8, TTL, POLR1B, CHCHD5, SLC20A1, …
106	2	2q21.3	2q21.3	0.00961538	0	0.00961538	-0.018755	0.0379858	1	1	NA	NA	ZRANB3
107	2	2q21.3	2q22.1	0	0	0	0	0	NA	NA	NA	NA	R3HDM1, UBXN4, LCT, MCM6, DARS, CXCR4, RN7SKP141
108	2	2q22.1	2q22.1	0	0	0	0	0	NA	NA	NA	NA	THSD7B
109	2	2q22.1	2q24.2	0	0	0	0	0	NA	NA	NA	NA	RNA5SP105, HNMT, SPOPL, NXPH2, RN7SKP286, SNORA72.ENSG00000206901.1, RN7SL283P, LRP1B, KYNU, ARHGAP15, GTDC1, ZEB2, TEX41, snR65.ENSG00000253036.1, snoU13.ENSG00000238860.1, RNA5SP106, ACVR2A, ORC4, MBD5, SNORA48.ENSG00000212181.1, EPC2, KIF5C, LYPD6B, LYPD6, MMADHC, RND3, RBM43, NMI, TNFAIP6, RN7SL124P, RIF1, NEB, ARL5A, CACNB4, STAM2, FMNL2, PRPF40A, ARL6IP6, SNORD56.ENSG00000200377.1, RPRM, GA…
110	2	2q24.2	2q24.2	0.00961538	0	0.00961538	-0.018755	0.0379858	1	1	NA	NA	WDSUB1
111	2	2q24.2	2q31.1	0	0	0	0	0	NA	NA	NA	NA	BAZ2B, MARCH7, CD302, LY75, PLA2R1, ITGB6, RBMS1, RMRPP3, MIR4785, RN7SL423P, TANK, PSMD14, TBR1, snoU13.ENSG00000238570.1, SLC4A10, DPP4, GCG, FAP, IFIH1, GCA, KCNH7, RNA5SP109, FIGN, GRB14, COBLL1, SNORA70F, RNA5SP110, RNA5SP111, SLC38A11, SCN3A, RN7SL455P, SCN2A, CSRNP3, GALNT3, TTC21B, SCN1A, RN7SKP152, SCN9A, snoU13.ENSG00000238662.1, SCN7A, XIRP2, B3GALT1, STK39, RN7SL95P, RN7SL813P, CERS6,…
112	2	2q31.1	2q31.1	0.00961538	0	0.00961538	-0.018755	0.0379858	1	1	NA	NA	LRP2, BBS5, KLHL41, FASTKD1, PPIG, CCDC173, KLHL23, PHOSPHO2, SNORA51.ENSG00000206961.1, SSB, METTL5, U3.ENSG00000252981.1, UBR3
113	2	2q31.1-q31.2	2q32.1	0	0	0	0	0	NA	NA	NA	NA	MYO3B, SP5, ERICH2, GAD1, GORASP2, TLK1, snoU13.ENSG00000238567.1, METTL8, DCAF17, CYBRD1, DYNC1I2, SLC25A12, HAT1, METAP1D, DLX1, DLX2, snoU13.ENSG00000238572.1, ITGA6, PDK1, snoU13.ENSG00000239041.1, RAPGEF4, MLTK, CDCA7, SP3, OLA1, RN7SL65P, SP9, CIR1, SCRN3, GPR155, WIPF1, CHRNA1, CHN1, ATF2, MIR933, ATP5G3, KIAA1715, EVX2, HOXD13, HOXD12, HOXD10, HOXD11, HOXD9, HOXD8, HOXD3, HOXD4, MIR10B, H…
114	2	2q32.1	2q32.1	0	0.0116279	-0.0116279	-0.0449069	0.0216511	0.923984	1	NA	NA	DNAJC10
115	2	2q32.1	2q32.1	0	0	0	0	0	NA	NA	NA	NA	FRZB, NCKAP1, SNORA77.ENSG00000221498.1, DUSP19, NUP35, snoU13.ENSG00000238306.1, MIR548AE1
116	2	2q32.1	2q32.1	0.00961538	0	0.00961538	-0.018755	0.0379858	1	1	NA	NA	ZNF804A
117	2	2q32.1	2q33.1	0	0	0	0	0	NA	NA	NA	NA	FSIP2, U8.ENSG00000212581.1, ZC3H15, ITGAV, FAM171B, ZSWIM2, RN7SKP42, CALCRL, TFPI, RNA5SP114, GULP1, MIR561, DIRC1, COL3A1, MIR1245A, COL5A2, MIR3129, WDR75, SLC40A1, ASNSD1, ANKAR, OSGEPL1, ORMDL1, PMS1, C2orf88, MSTN, HIBCH, INPP1, MFSD6, TMEM194B, RN7SKP179, NAB1, GLS, STAT1, STAT4, MYO1B, NABP1, SDPR, TMEFF2, PCGEM1, SNORD59.ENSG00000252517.1, SLC39A10, DNAH7, STK17B, HECW2, snoU13.ENSG0000…
118	2	2q33.1	2q33.2	0.00961538	0	0.00961538	-0.018755	0.0379858	1	1	NA	NA	SPATS2L, KCTD18, SGOL2, AOX1, AOX2P, BZW1, RNA5SP115, CLK1, PPIL3, NIF3L1, ORC2, RN7SL694P, FAM126B, NDUFB3, CFLAR, CASP10, CASP8, ALS2CR12, TRAK2, STRADB, ALS2CR11, TMEM237, MPP4
119	2	2q33.1	2q33	0	0	0	0	0	NA	NA	NA	NA	ALS2, CDK15, FZD7, snoU13.ENSG00000238770.1, SUMO1, NOP58, SNORD70.ENSG00000212534.1, SNORD70.ENSG00000212309.1, SNORD11B, SNORD11.ENSG00000238317.1, RN7SL753P, RN7SL40P, BMPR2, FAM117B, ICA1L, WDR12, CARF, NBEAL1, SNORA1.ENSG00000202059.1, CYP20A1, RN7SL670P, ABI2, RAPH1, CD28, CTLA4, ICOS
120	2	2q33.3	2q33.3	0	0	0	0	0	NA	NA	NA	NA	PARD3B
121	2	2q33.3	2q34	0	0	0	0	0	NA	NA	NA	NA	NRP2, RN7SKP178, INO80D, Vault.ENSG00000252485.1, NDUFS1, EEF1B2, SNORA41.ENSG00000207406.1, SNORD51.ENSG00000207047.2, GPR1, RN7SKP200, RN7SKP260, ZDBF2, ADAM23, DYTN, MDH1B, FASTKD2, CPO, KLF7, MIR2355
122	2	2q34	2q34	0	0.0116279	-0.0116279	-0.0449069	0.0216511	0.923984	1	NA	NA	CREB1, METTL21A, CCNYL1, MIR4775, FZD5, PLEKHM3, RNA5SP116, snoU13.ENSG00000238582.1, CRYGEP, CRYGD, CRYGC, CRYGB, CRYGA, C2orf80, IDH1, PIKFYVE
123	2	2q33	2q33	0.00961538	0.0232558	-0.0136404	-0.0612267	0.0339459	0.868041	1	NA	NA	PTH2R
124	2	2q33	2q35	0	0.0116279	-0.0116279	-0.0449069	0.0216511	0.923984	1	NA	NA	RNA5SP117, MAP2, RNA5SP118
125	2	2q35	2q35	0	0.0116279	-0.0116279	-0.0449069	0.0216511	0.923984	1	NA	NA	UNC80
126	2	2q32-q33.3	2q35	0	0.0116279	-0.0116279	-0.0449069	0.0216511	0.923984	1	NA	NA	RPE, KANSL1L, ACADL, MYL1, LANCL1, CPS1, ERBB4, RNA5SP119, MIR548F2, IKZF2, SPAG16, MIR4438, VWC2L, BARD1, SNORA70.ENSG00000207274.1, ABCA12, snoU13.ENSG00000238663.1, ATIC, FN1, LINC00607, MREG, PECR, TMEM169, XRCC5, MARCH4, SMARCAL1, RPL37A, IGFBP2, IGFBP5, RNA5SP120, TNP1, RN7SKP43
127	2	2q35	2q35	0	0.0232558	-0.0232558	-0.0657308	0.0192192	0.395677	1	NA	NA	DIRC3
128	2	2q35-q36	2q37.1|2q37.1	0	0.0116279	-0.0116279	-0.0449069	0.0216511	0.923984	1	NA	NA	TNS1, RUFY4, CXCR2P1, CXCR2, CXCR1, snoU13.ENSG00000238428.1, ARPC2, AAMP, GPBAR1, PNKD, TMBIM1, snoU13.ENSG00000238736.1, C2orf62, SLC11A1, CTDSP1, MIR26B, VIL1, USP37, RN7SKP38, RQCD1, PLCD4, U3.ENSG00000252805.1, ZNF142, BCS1L, RNF25, STK36, TTLL4, CYP27A1, PRKAG3, WNT6, WNT10A, CDK5R2, LINC00608, CRYBA2, FEV, CCDC108, MIR375, IHH, MIR3131, NHEJ1, SLC23A3, RN7SL764P, CNPPD1, FAM134A, ZFAND2B, …
129	2	2q37.1	2q37.1	0	0.0116279	-0.0116279	-0.0449069	0.0216511	0.923984	1	NA	NA	NCL
130	2	2q37.1	2q37.1	0	0.0116279	-0.0116279	-0.0449069	0.0216511	0.923984	1	NA	NA	SNORA75.ENSG00000206885.1, SNORD20, SNORD82
131	2	2q37.1	2q37.1	0	0.0116279	-0.0116279	-0.0449069	0.0216511	0.923984	1	NA	NA	C2orf57, LINC00471, NMUR1
132	2	2q37.1	2q37.1	0	0.0116279	-0.0116279	-0.0449069	0.0216511	0.923984	1	NA	NA	RN7SL499P, MGC4771, PTMA, PDE6D, COPS7B, MIR1471, NPPC, DIS3L2, MIR562, ALPPL2, ALPP, ECEL1P2, ALPI, ECEL1, PRSS56, CHRND, CHRNG, TIGD1, EIF4E2, MIR5001, EFHD1, RN7SL359P, snoU13.ENSG00000239170.1, GIGYF2, KCNJ13, C2orf82, NGEF, NEU2, INPP5D, RN7SL32P, ATG16L1, SCARNA5, SCARNA6.ENSG00000251791.1, SAG, DGKD, USP40, UGT1A10, UGT1A8, UGT1A9, UGT1A7, UGT1A6, UGT1A5, UGT1A4, UGT1A3, DNAJB3, UGT1A1, MR…
133	2	2q37.1	2q37.1	0.00961538	0.0116279	-0.00201252	-0.0334377	0.0294127	1	1	NA	NA	SPP2
134	2	2q37.1	2q37.3	0	0.0116279	-0.0116279	-0.0449069	0.0216511	0.923984	1	NA	NA	ARL4C, SH3BP4, AGAP1, RN7SL204P, GBX2, ASB18, IQCA1, ACKR3, COPS8, COL6A3, MLPH, PRLH, RAB17, LRRFIP1, RBM44, RAMP1, SNORD39.ENSG00000263723.1, UBE2F, SCLY, ESPNL, KLHL30, FAM132B, ILKAP, HES6, PER2, TRAF3IP1, ASB1, HDAC4, MIR4440, MIR4441, TWIST2, MIR4269, MIR2467, NDUFA10, MIR4786, OR6B2, PRR21, OR6B3, MYEOV2, OTOS, GPC1, MIR149, ANKMY1, DUSP28, RNPEPL1, CAPN10, GPR35, AQP12A, AQP12B, KIF1A, AG…
135	3	3p26.1	3p26.1	0.0384615	0	0.0384615	-0.00911978	0.0860429	0.183345	1	NA	NA	CHL1
136	3	3p26.3	3p26.3	0.0384615	0	0.0384615	-0.00911978	0.0860429	0.183345	1	NA	NA	CNTN4
137	3	3p26-p25	3p26.3	0.0384615	0	0.0384615	-0.00911978	0.0860429	0.183345	1	NA	NA	CNTN6, RN7SKP144, RN7SL120P
138	3	3p26-p24	3p25.1	0.0384615	0	0.0384615	-0.00911978	0.0860429	0.183345	1	NA	NA	IL5RA, SNORA43.ENSG00000253049.1, TRNT1
139	3	3p26.2	3p26.2	0.0384615	0	0.0384615	-0.00911978	0.0860429	0.183345	1	NA	NA	CRBN
140	3	3p26.1	3p26.1	0.0384615	0	0.0384615	-0.00911978	0.0860429	0.183345	1	NA	NA	SUMF1, LRRN1, SETMAR, ITPR1, EGOT, snoU13.ENSG00000239126.1, BHLHE40, ARL8B, EDEM1
141	3	3p26.1	3p26.1	0.0480769	0	0.0480769	-0.00365976	0.0998136	0.108405	1	NA	NA	MIR4790, RN7SL553P
142	3	3p26.1-p25.1	3p25	0.0384615	0	0.0384615	-0.00911978	0.0860429	0.183345	1	NA	NA	GRM7, RNU4ATAC17P, LMCD1, LINC00312, SSUH2, CAV3, OXTR, RAD18, SNORA43.ENSG00000199815.1, SRGAP3, THUMPD3, SETD5, LHFPL4, MTMR14, CPNE9, BRPF1, OGG1, CAMK1, TADA3, ARPC4, TTLL3, RPUSD3, CIDEC, JAGN1, IL17RE, IL17RC, CRELD1, PRRT3, EMC3, CIDECP, FANCD2, FANCD2OS, BRK1, snoU13.ENSG00000238642.1, VHL, snoU13.ENSG00000238345.1, IRAK2, TATDN2, LINC00852, GHRLOS, GHRL, SEC13, ATP2B2, MIR378B, MIR885, L…
143	3	3p25	3p25	0.0384615	0.0116279	0.0268336	-0.0271398	0.080807	0.487132	1	NA	NA	PPARG, TSEN2, RNA5SP123, C3orf83, MKRN2, RAF1, snoU13.ENSG00000239140.1, TMEM40, CAND2, RPL32, SNORA7A
144	3	3p25.2	3p24.3	0.0384615	0	0.0384615	-0.00911978	0.0860429	0.183345	1	NA	NA	IQSEC1, NUP210, HDAC11, FBLN2, LINC00620, WNT7A, FGD5P1, TPRXL, CHCHD4, TMEM43, XPC, LSM3, RNA5SP124, SLC6A6, GRIP2, CCDC174, C3orf20, FGD5, NR2C2, MRPS25, ZFYVE20, COL6A4P1, CAPN7, SH3BP5, snoU13.ENSG00000238891.1, METTL6, EAF1, COLQ, MIR4270, RN7SL110P, HACL1, BTD, ANKRD28, MIR3134, RN7SL4P, MIR563, GALNT15, DPH3, OXNAD1, RFTN1, LINC00690, DAZL, PLCL2, MIR3714
145	3	3p24.3	3p24.3	0.0480769	0	0.0480769	-0.00365976	0.0998136	0.108405	1	NA	NA	TBC1D5
146	3	3p24.3	3p24.3	0.0384615	0	0.0384615	-0.00911978	0.0860429	0.183345	1	NA	NA	U7.ENSG00000271841.1, SATB1, KCNH8, MIR4791
147	3	3p24.3	3p23	0.0480769	0	0.0480769	-0.00365976	0.0998136	0.108405	1	NA	NA	EFHB, RAB5A, PP2D1, KAT2B, MIR3135A, SGOL1, RNY4P22, ZNF385D, HMGB1P5, UBE2E2, UBE2E1, NKIRAS1, RPL15, NR1D2, LINC00691, THRB, MIR4792, RN7SL216P, RNA5SP125, RARB, RNA5SP126, SNORD5.ENSG00000272166.1, TOP2B, MIR4442, NGLY1, OXSM, LINC00692, LRRC3B, NEK10, SLC4A7, RN7SL859P, EOMES, CMC1, AZI2, ZCWPW2, LINC00693, RBMS3, U3.ENSG00000199927.1, TGFBR2, GADL1, RNA5SP127, STT3B
148	3	3p22.3	3p22.3	0.0576923	0	0.0576923	0.00225944	0.113125	0.0647832	1	NA	NA	OSBPL10
149	3	3p23	3p22.3	0.0480769	0	0.0480769	-0.00365976	0.0998136	0.108405	1	NA	NA	ZNF860, SNORA25.ENSG00000201701.1, GPD1L, snoU13.ENSG00000238646.1, CMTM8, CMTM7, CMTM6, DYNC1LI1, CNOT10, TRIM71, CCR4, GLB1, TMPPE, RN7SL296P, CRTAP, SUSD5, FBXL2, UBP1, RNA5SP128, CLASP2, PDCD6IP
150	3	3p22.3	3p21.31	0.0480769	0.0116279	0.036449	-0.0211173	0.0940153	0.310917	1	NA	NA	ARPP21, STAC, RN7SKP227, DCLK3, HSPD1P6, TRANK1, RNU6ATAC4P, EPM2AIP1, MLH1, LRRFIP2, snoU13.ENSG00000238929.1, GOLGA4, RNA5SP129, C3orf35, ITGA9, CTDSPL, MIR26A1, VILL, PLCD1, DLEC1, ACAA1, MYD88, OXSR1, SLC22A13, SLC22A14, XYLB, ACVR2B, EXOG, SCN5A, SCN10A, SCN11A, WDR48, GORASP1, TTC21A, CSRNP1, XIRP1, CX3CR1, CCR8, SLC25A38, RPSA, SNORA62.ENSG00000202363.1, SNORA6, MOBP, MYRIP, RN7SL411P, SNO…
151	3	3p21.31	3p21.31	0.0576923	0.0116279	0.0460644	-0.0147708	0.1069	0.196735	1	NA	NA	FBXW12, RN7SL321P
152	3	3p21.31	3p14.1	0.0480769	0.0116279	0.036449	-0.0211173	0.0940153	0.310917	1	NA	NA	PLXNB1, CCDC51, TMA7, ATRIP, SHISA5, TREX1, PFKFB4, UCN2, COL7A1, MIR711, UQCRC1, TMEM89, SLC26A6, CELSR3, MIR4793, NCKIPSD, IP6K2, PRKAR2A, SLC25A20, ARIH2OS, ARIH2, P4HTM, WDR6, DALRD3, MIR191, MIR425, NDUFAF3, IMPDH2, QRICH1, RN7SL182P, QARS, USP19, LAMB2, CCDC71, KLHDC8B, C3orf84, CCDC36, C3orf62, MIR4271, USP4, GPX1, RHOA, TCTA, AMT, NICN1, DAG1, RNA5SP130, BSN, APEH, MST1, RNF123, AMIGO3, G…
153	3	3p21.1-p12	3p21.1-p12	0.0576923	0.0116279	0.0460644	-0.0147708	0.1069	0.196735	1	NA	NA	ATXN7
154	3	3p14.1	3p14.1	0.0480769	0.0116279	0.036449	-0.0211173	0.0940153	0.310917	1	NA	NA	PSMD6, U3.ENSG00000200222.1, PRICKLE2, ADAMTS9
155	3	3p14.1	3p14.1	0.0576923	0.0116279	0.0460644	-0.0147708	0.1069	0.196735	1	NA	NA	MAGI1
156	3	3p14.1	3p14.1	0.0673077	0.0116279	0.0556798	-0.00816001	0.11952	0.123721	1	NA	NA	SLC25A26
157	3	3p14.1	3p14.1	0.0576923	0.0116279	0.0460644	-0.0147708	0.1069	0.196735	1	NA	NA	RN7SL482P
158	3	3p14	3p14	0.0673077	0.0116279	0.0556798	-0.00816001	0.11952	0.123721	1	NA	NA	LRIG1
159	3	3p14	3p14.1	0.0576923	0.0116279	0.0460644	-0.0147708	0.1069	0.196735	1	NA	NA	KBTBD8, SUCLG2
160	3	3p14.1	3p13	0.0576923	0.0232558	0.0344365	-0.0311641	0.100037	0.415875	1	NA	NA	FAM19A1, FAM19A4, RNA5SP135, EOGT, TMF1, MIR3136, UBA3, ARL6IP5, LMOD3, FRMD4B, MITF, RN7SL418P
161	3	3p14.1	3p13	0.0576923	0.0348837	0.0228086	-0.0470742	0.0926914	0.693862	1	NA	NA	FOXP1, MIR1284, EIF4E3, GPR27, PROK2, RN7SL271P
162	3	3p14.2	3p13	0.0576923	0.0232558	0.0344365	-0.0311641	0.100037	0.415875	1	NA	NA	LINC00877, LINC00870, RYBP, snoU13.ENSG00000238568.1, RNA5SP136, SHQ1, GXYLT2
163	3	3p13	3p13	0.0673077	0.0232558	0.0440519	-0.0243058	0.11241	0.280255	1	NA	NA	PPP4R2
164	3	3p13	3p12.3	0.0576923	0.0232558	0.0344365	-0.0311641	0.100037	0.415875	1	NA	NA	EBLN2, snoU13.ENSG00000238416.1, PDZRN3, CNTN3
165	3	3p12.3	3p12.3	0.0576923	0.0116279	0.0460644	-0.0147708	0.1069	0.196735	1	NA	NA	RN7SL294P, FAM86DP, FRG2C, LINC00960, MIR1324, MIR4273, RN7SL92P, ZNF717, ROBO2, RN7SL647P, RN7SKP61, ROBO1, RN7SL751P, MIR3923, GBE1
166	3	3p12.1	3p12.1	0.0576923	0	0.0576923	0.00225944	0.113125	0.0647832	1	NA	NA	LINC00971
167	3	3p12.1	3p12.1	0.0480769	0	0.0480769	-0.00365976	0.0998136	0.108405	1	NA	NA	CADM2, MIR5688, snoZ40, RN7SKP284
168	3	3p12.1	3p11.1	0.0480769	0	0.0480769	-0.00365976	0.0998136	0.108405	1	NA	NA	VGLL3, CHMP2B, MIR4795, POU1F1, RNU6ATAC6P, HTR1F, CGGBP1, ZNF654, C3orf38
169	3	3p11.2	3p11.2	0.0480769	0.0116279	0.036449	-0.0211173	0.0940153	0.310917	1	NA	NA	EPHA3
170	3	3p11.2	3q11.1	0.0480769	0	0.0480769	-0.00365976	0.0998136	0.108405	1	NA	NA	U3.ENSG00000212598.1
171	3	3q11.1	3q12.3	0.0384615	0	0.0384615	-0.00911978	0.0860429	0.183345	1	NA	NA	ARL13B, PROS1, STX19, DHFRL1, NSUN3, LINC00879, MTHFD2P1, MTRNR2L12, EPHA6, ARL6, CRYBG3.ENSG00000233280.2, CRYBG3.ENSG00000080200.5, MINA, GABRR3, OR5AC1, OR5AC2, OR5H1, OR5H14, OR5H15, OR5H6, OR5H2, OR5H8P, OR5K4, OR5K3, OR5K1, CLDND1, OR5K2, CPOX, GPR15, ST3GAL6, DCBLD2, LINC00973
172	3	3q12.3	3q12.3	0.0384615	0	0.0384615	-0.00911978	0.0860429	0.183345	1	NA	NA	COL8A1
173	3	3q12.1	3p12-q12	0.0384615	0	0.0384615	-0.00911978	0.0860429	0.183345	1	NA	NA	CMSS1, FILIP1L, MIR3921, TMEM30C, SNORD61.ENSG00000238377.1, TBC1D23, NIT2, TOMM70A, LNP1, TMEM45A, GPR128, SNORA31.ENSG00000252989.1, TFG, ABI3BP, snoU13.ENSG00000238312.1, IMPG2, SENP7, snoU13.ENSG00000238525.1, TRMT10C, PCNP, ZBTB11, RPL24, CEP97, NXPE3, NFKBIZ
174	3	3q12.3	3q13.1	0.0384615	0	0.0384615	-0.00911978	0.0860429	0.183345	1	NA	NA	ZPLD1, MIR548AB
175	3	3q13.1	3q13.31	0.0384615	0	0.0384615	-0.00911978	0.0860429	0.183345	1	NA	NA	ALCAM, CBLB, LINC00882, LINC00883, CCDC54, BBX, LINC00635, LINC00636, CD47, IFT57, HHLA2, MYH15, KIAA1524, SNORA70.ENSG00000202379.1, DZIP3, RETNLB, TRAT1, DPPA2, GUCA1C, LINC00488, MORC1, U3.ENSG00000221633.1, DPPA4, MIR4445, RNU6ATAC15P, PVRL3, CD96, ZBED2, PLCXD2, PHLDB2, ABHD10, TAGLN3, TMPRSS7, C3orf52, MIR567, GCSAM, SLC9C1, CD200, BTLA, ATG3, SLC35A5, CCDC80, CD200R1L, CD200R1, GTPBP8, C3o…
176	3	3q13.2-q21	3q13.2-q21	0.0480769	0.0232558	0.0248211	-0.0378109	0.0874532	0.605032	1	NA	NA	LSAMP
177	3	3q13.31	3q13.31	0.0384615	0	0.0384615	-0.00911978	0.0860429	0.183345	1	NA	NA	RN7SL815P, LINC00903, RN7SL582P
178	3	3q13.31	3q13.32	0.0384615	0.0116279	0.0268336	-0.0271398	0.080807	0.487132	1	NA	NA	TUSC7, MIR4447, LINC00901
179	3	3q13.32	3q21.1	0.0384615	0	0.0384615	-0.00911978	0.0860429	0.183345	1	NA	NA	IGSF11, C3orf30, UPK1B, B4GALT4, ARHGAP31, TMEM39A, POGLUT1, TIMMDC1, CD80, ADPRH, PLA1A, POPDC2, COX17, MAATS1, NR1I2, GSK3B, RN7SL762P, RN7SL397P, GPR156, LRRC58, FSTL1, NDUFB4, HGD, RABL3, GTF2E1, STXBP5L, MIR5682, POLQ, ARGFX, FBXO40, GOLGB1, HCLS1, RN7SL172P, snoU13.ENSG00000238670.1, IQCB1, EAF2, SLC15A2, ILDR1, CD86, CASR, SNORD112.ENSG00000252170.1, CSTA, CCDC58, FAM162A, WDR5B, KPNA1, PA…
180	3	3q21.1	3q21.1	0.0384615	0.0116279	0.0268336	-0.0271398	0.080807	0.487132	1	NA	NA	PDIA5, SEC22A
181	3	3q21.1	3q21.3	0.0384615	0	0.0384615	-0.00911978	0.0860429	0.183345	1	NA	NA	ADCY5, PTPLB, MYLK, SNORA5, CCDC14, ROPN1, KALRN, MIR5002, UMPS, MIR544B, ITGB5, MUC13, HEG1, RNA5SP137, SLC12A8, MIR5092, ZNF148, SNX4, snoU13.ENSG00000238992.1, OSBPL11, MIR548I1, ALG1L, FAM86JP, ROPN1B, SLC41A3, ALDH1L1, U1.ENSG00000272020.1, KLF15
182	3	3q21.3	3q21.3	0.0480769	0	0.0480769	-0.00365976	0.0998136	0.108405	1	NA	NA	CCDC37
183	3	3q21.3	3q21	0.0384615	0	0.0384615	-0.00911978	0.0860429	0.183345	1	NA	NA	ZXDC, UROC1, C3orf22, CHST13, RNA5SP138, TXNRD3NB, TXNRD3, NUP210P1, CHCHD6, PLXNA1, C3orf56, TPRA1, MCM2, PODXL2, ABTB1, MGLL, KBTBD12, RNA5SP139, SEC61A1, RUVBL1, EEFSEC, MIR1280, DNAJB8, GATA2, C3orf27
184	3	3q21.3	3q21	0.0480769	0	0.0480769	-0.00365976	0.0998136	0.108405	1	NA	NA	RPN1, SNORA24.ENSG00000207130.1, RAB7A, RN7SL698P, ACAD9, KIAA1257, EFCC1, GP9, snoU13.ENSG00000252435.1, snoU13.ENSG00000238874.1, RAB43, ISY1, CNBP
185	3	3q21.3	3q25.2	0.0288462	0	0.0288462	-0.0139431	0.0716355	0.315843	1	NA	NA	COPG1, C3orf37, H1FX, RPL32P3, SNORA7B, EFCAB12, MBD4, IFT122, RHO, H1FOO, PLXND1, RN7SL752P, TMCC1, TRH, ALG1L2, FAM86HP, COL6A4P2, COL6A5, COL6A6, PIK3R4, RN7SKP212, ATP2C1, ASTE1, NEK11, NUDT16P, NUDT16, MRPL3, SNORA58.ENSG00000249020.1, CPNE4, MIR5704, snoU13.ENSG00000238701.1, ACPP, DNAJC13, ACAD11, NPHP3, ACKR4, UBA5, TMEM108, BFSP2, SNORA33.ENSG00000201827.1, CDV3, TOPBP1, TFP1, RNA5SP140,…
186	3	3q25.2	3q25.2	0.0480769	0	0.0480769	-0.00365976	0.0998136	0.108405	1	NA	NA	C3orf79
187	3	3q25.2	3q25.31	0.0288462	0	0.0288462	-0.0139431	0.0716355	0.315843	1	NA	NA	U8.ENSG00000201398.1, ARHGEF26, DHX36, snoU13.ENSG00000271922.1, GPR149, MME, PLCH1, C3orf33, SLC33A1, GMPS, KCNAB1, SSR3, TIPARP, LINC00886
188	3	3q25.31	3q25.31	0.0384615	0	0.0384615	-0.00911978	0.0860429	0.183345	1	NA	NA	LEKR1, RN7SKP177
189	3	3q25.31	3q26.2	0.0288462	0	0.0288462	-0.0139431	0.0716355	0.315843	1	NA	NA	LINC00880, LINC00881, CCNL1, RNA5SP146, VEPH1, PTX3, C3orf55, RN7SKP46, SHOX2, RSRC1, MLF1, GFM1, LXN, RARRES1, MFSD1, IQCJ, MIR3919, SCHIP1, IL12A, C3orf80, IFT80, SMC4, MIR15B, TRIM59, KPNA4, SCARNA7, KRT8P12, ARL14, SNORA72.ENSG00000207084.1, PPM1L, B3GALNT1, NMD3, SPTSSB, OTOL1, CT64, snoU13.ENSG00000238398.1, MIR1263, MIR720, SI, SLITRK3, BCHE, RN7SKP298, ZBBX, SERPINI2, WDR49, PDCD10, SERPI…
190	3	3q26.2	3q26.2	0.0384615	0	0.0384615	-0.00911978	0.0860429	0.183345	1	NA	NA	MECOM
191	3	3q26.2	3q26.31	0.0288462	0	0.0288462	-0.0139431	0.0716355	0.315843	1	NA	NA	ACTRT3, TERC, MYNN, LRRC34, LRRIQ4, LRRC31, SAMD7, SEC62, GPR160, PHC3, PRKCI, SKIL, CLDN11, SLC7A14, RNY5P3, RPL22L1, EIF5A2, SLC2A2, TNIK, MIR569, PLD1, PP13439, TMEM212, snoU13.ENSG00000238359.1, FNDC3B, RN7SL141P, GHSR, TNFSF10, NCEH1, ECT2, SNORA72.ENSG00000200355.1
192	3	3q26.31	3q26.31	0.0288462	0	0.0288462	-0.0139431	0.0716355	0.315843	1	NA	NA	SPATA16
193	3	3q26.31	3q26.31	0.0288462	0	0.0288462	-0.0139431	0.0716355	0.315843	1	NA	NA	snoU13.ENSG00000239141.1
194	3	3q26.31	3q26.31	0.0288462	0	0.0288462	-0.0139431	0.0716355	0.315843	1	NA	NA	NLGN1
195	3	3q26.31	3q26.31	0.0288462	0	0.0288462	-0.0139431	0.0716355	0.315843	1	NA	NA	RN7SKP234
196	3	3q26.31	3q26.31	0.0384615	0.0232558	0.0152057	-0.0442079	0.0746193	0.85727	1	NA	NA	NAALADL2
197	3	3q26.31	3q26.32	0.0288462	0	0.0288462	-0.0139431	0.0716355	0.315843	1	NA	NA	RN7SKP40, MIR4789, snoU13.ENSG00000271842.1, RNA5SP147
198	3	3q26.32	3q26.32	0.0288462	0	0.0288462	-0.0139431	0.0716355	0.315843	1	NA	NA	TBL1XR1
199	3	3q26.32	3q26.32	0.0288462	0	0.0288462	-0.0139431	0.0716355	0.315843	1	NA	NA	LINC00501, LINC00578, RN7SKP52, SNORA18.ENSG00000200288.1
200	3	3q26.32	3q26.32	0.0384615	0	0.0384615	-0.00911978	0.0860429	0.183345	1	NA	NA	KCNMB2, RNA5SP148
201	3	3q26.32	3q27	0.0288462	0	0.0288462	-0.0139431	0.0716355	0.315843	1	NA	NA	ZMAT3, PIK3CA, SNORA25.ENSG00000201957.1, KCNMB3, ZNF639, MFN1, GNB4, ACTL6A, MRPL47, NDUFB5, snoU13.ENSG00000239096.1, USP13, PEX5L, RNA5SP149, U8.ENSG00000201810.1, TTC14, CCDC39, RN7SL229P, FXR1, DNAJC19, SOX2, RN7SL703P, RNA5SP150, RN7SKP265, ATP11B, DCUN1D1, MCCC1, LAMP3, MCF2L2, B3GNT5, RNA5SP151, ABCC5, AP2M1, CYP2AB1P, DVL3
202	3	3q27.1	3q27.1	0.0384615	0	0.0384615	-0.00911978	0.0860429	0.183345	1	NA	NA	EIF2B5
203	3	3q27.1	3q28	0.0288462	0	0.0288462	-0.0139431	0.0716355	0.315843	1	NA	NA	HTR3C, HTR3D, HTR3E, KLHL24, KLHL6, LINC00888, MAP6D1, MIR4448, PARL, SNORA4.ENSG00000251730.1, SNORA63.ENSG00000199363.1, SNORA63.ENSG00000201229.1, SNORA81.ENSG00000253092.1, YEATS2, ABCF3, VWA5B2, ALG3, ECE2, MIR1224, CAMK2N2, PSMD2, EIF4G1, SNORD66.ENSG00000212158.1, FAM131A, CLCN2, POLR2H, THPO, CHRD, EPHB3, MAGEF1, VPS8, C3orf70, EHHADH, MAP3K13, snoU13.ENSG00000239146.1, TMEM41A, LIPH, SEN…
204	3	3q28	3q28	0.0288462	0	0.0288462	-0.0139431	0.0716355	0.315843	1	NA	NA	ETV5
205	3	3q27.2-q27.3	3q28	0.0288462	0	0.0288462	-0.0139431	0.0716355	0.315843	1	NA	NA	DGKG, CRYGS, TBCCD1, DNAJB11, AHSG, FETUB, HRG, KNG1, EIF4A2, SNORD2.ENSG00000238942.1, RFC4, SNORA4.ENSG00000263776.1, SNORA63.ENSG00000200320.1, SNORA63.ENSG00000200418.1, SNORA81.ENSG00000221420.2, ADIPOQ, ST6GAL1, RPL39L, RTP1, MASP1, RTP4, snoU13.ENSG00000239093.1, SST, RTP2, BCL6, LPP, MIR28, TPRG1, TP63, MIR944
206	3	3q28	3q28	0.0288462	0.0116279	0.0172182	-0.0327495	0.067186	0.75256	1	NA	NA	LEPREL1
207	3	3q28	3q28	0.0288462	0	0.0288462	-0.0139431	0.0716355	0.315843	1	NA	NA	RN7SL486P, CLDN1, CLDN16, TMEM207, IL1RAP, RN7SKP296, GMNC, OSTN
208	3	3q28	3q28	0.0288462	0	0.0288462	-0.0139431	0.0716355	0.315843	1	NA	NA	UTS2B, CCDC50
209	3	3q28	3q29	0.0288462	0	0.0288462	-0.0139431	0.0716355	0.315843	1	NA	NA	PYDC2, RN7SKP222, FGF12, snoU13.ENSG00000238902.1, MB21D2, HRASLS, ATP13A5, ATP13A4, OPA1, RN7SL447P, HES1, RN7SL215P, LINC00887, CPN2, LRRC15, GP5, ATP13A3, LINC00884, TMEM44, LSG1, FAM43A, XXYLT1, MIR3137, RN7SL36P
210	3	3q29	3q29	0.0288462	0	0.0288462	-0.0139431	0.0716355	0.315843	1	NA	NA	ACAP2, APOD, LINC00969, MIR570, MUC20, MUC4, PPP1R2, RN7SL773P, RNU6ATAC24P, SDHAP1, TNK2, TFRC
211	3	3q29	3q29	0.0288462	0	0.0288462	-0.0139431	0.0716355	0.315843	1	NA	NA	LINC00885, ZDHHC19, SLC51A, PCYT1A, TCTEX1D2, TM4SF19, UBXN7, RN7SL434P, RN7SL738P, RNF168, SMCO1, WDR53, FBXO45, NRROS, PIGX, CEP19, DLG1, MFI2, NCBP2, PAK2, PIGZ, SENP5, U4.ENSG00000272359.1, MIR4797, snoU13.ENSG00000238491.1, BDH1, KIAA0226, MIR922, FYTTD1, LRCH3, ANKRD18DP, FAM157A, IQCG, LMLN, RPL35A
212	4	4p16.3	4p16.1	0.0288462	0	0.0288462	-0.0139431	0.0716355	0.315843	1	NA	NA	ABCA11P, ATP5I, CPLX1, DGKQ, FGFRL1, GAK, IDUA, MFSD7, MIR571, MYL5, PCGF3, PDE6B, PIGG, RN7SL358P, RNF212, SLC26A1, TMEM175, ZNF141, ZNF595, ZNF718, ZNF721, ZNF732, ZNF876P, TMED11P, SNORA48.ENSG00000212458.1, SPON2, CTBP1, MAEA, CRIPAK, UVSSA, FAM53A, SLBP, TMEM129, TACC3, FGFR3, LETM1, RN7SL671P, WHSC1, SCARNA22, MIR943, NELFA, C4orf48, NAT8L, POLN, HAUS3, MXD4, MIR4800, ZFYVE28, RN7SL589P, RN…
213	4	4p16.1	4p16.1	0.0288462	0	0.0288462	-0.0139431	0.0716355	0.315843	1	NA	NA	SORCS2
214	4	4p16.1	4p15.31	0.0288462	0	0.0288462	-0.0139431	0.0716355	0.315843	1	NA	NA	MIR4798, MIR4274, PSAPL1, AFAP1, ABLIM2, MIR95, SH3TC1, HTRA3, ACOX3, RNA5SP152, TRMT44, GPR78, CPZ, DEFB131, FAM90A26, HMX1, MIR548I2, RNA5SP153, USP17L10, USP17L11, USP17L12, USP17L13, USP17L15, USP17L17, USP17L18, USP17L19, USP17L20, USP17L21, USP17L22, USP17L23, USP17L24, USP17L25, USP17L26, USP17L27, USP17L28, USP17L29, USP17L30, USP17L5, SLC2A9, DRD5, RNA5SP154, WDR1, MIR3138, RNA5SP155, ZN…
215	4	4p15.32	4p15.32	0.0384615	0	0.0384615	-0.00911978	0.0860429	0.183345	1	NA	NA	KCNIP4
216	4	4p15.2	4p14	0.0288462	0	0.0288462	-0.0139431	0.0716355	0.315843	1	NA	NA	GPR125, snoU13.ENSG00000238383.1, GBA3, PPARGC1A, DHX15, MIR573, RN7SL16P, SOD3, CCDC149, LGI2, SEPSECS, PI4K2B, ZCCHC4, ANAPC4, SLC34A2, SEL1L3, SMIM20, RBPJ, CCKAR, TBC1D19, SNORD74.ENSG00000200999.1, STIM2, RN7SL101P, PCDH7, snoU13.ENSG00000238694.1, ARAP2, DTHD1, KIAA1239, MIR4801
217	4	4p14	4p14	0.0288462	0	0.0288462	-0.0139431	0.0716355	0.315843	1	NA	NA	C4orf19, RELL1
218	4	4p14	4p12	0.0288462	0	0.0288462	-0.0139431	0.0716355	0.315843	1	NA	NA	PGM2, TBC1D1, PTTG2
219	4	4p14	4p14	0.0288462	0	0.0288462	-0.0139431	0.0716355	0.315843	1	NA	NA	KLF3, RNA5SP158, TLR10, TLR1, TLR6, FAM114A1, MIR574, TMEM156
220	4	4p14	4p14	0.0288462	0	0.0288462	-0.0139431	0.0716355	0.315843	1	NA	NA	KLHL5, WDR19, RFC1, KLB, MIR5591, RPL9, LIAS, UGDH, SMIM14, UBE2K, RN7SL558P, PDS5A, RNA5SP159, N4BP2, SNORA51.ENSG00000201863.1, RHOH, CHRNA9, RBM47, MIR4802, NSUN7, APBB2, snoU13.ENSG00000238351.1, RNA5SP160, UCHL1
221	4	4p13	4p13	0.0384615	0.0116279	0.0268336	-0.0271398	0.080807	0.487132	1	NA	NA	LIMCH1
222	4	4p12	4p12	0.0288462	0	0.0288462	-0.0139431	0.0716355	0.315843	1	NA	NA	PHOX2B, LINC00682, TMEM33, DCAF4L1, SLC30A9, BEND4, SHISA3, ATP8A1, GRXCR1, RN7SKP82, RN7SL691P, RN7SL193P, KCTD8, YIPF7, GUF1, GNPDA2, RN7SKP199
223	4	4p12	4p12	0.0384615	0	0.0384615	-0.00911978	0.0860429	0.183345	1	NA	NA	GABRG1
224	4	4p12	4p12	0.0288462	0	0.0288462	-0.0139431	0.0716355	0.315843	1	NA	NA	GABRA2, COX7B2, GABRA4, GABRB1, snoU13.ENSG00000238301.1, COMMD8, ATP10D, CORIN, RN7SKP215, NFXL1, NIPAL1, CNGA1
225	4	4p12	4q13.3	0.0288462	0	0.0288462	-0.0139431	0.0716355	0.315843	1	NA	NA	TXK, CWH43, FRYL, OCIAD1, OCIAD2, SLAIN2, SLC10A4, TEC, ZAR1, DCUN1D4, LRRC66, SGCB, SPATA18, snoU13.ENSG00000239068.1, USP46, DANCR, MIR4449, SNORA26.ENSG00000212588.1, SNORA26.ENSG00000212490.1, RASL11B, SCFD2, FIP1L1, LNX1, CHIC2, GSX2, snoU13.ENSG00000238753.1, PDGFRA, KIT, RN7SL424P, KDR, RN7SL822P, SRD5A3, TMEM165, CLOCK, RN7SKP30, PDCL2, NMU, EXOC1, CEP135, RNA5SP161, KIAA1211, RNA5SP162, …
226	4	4q13	4q21.1	0.0288462	0	0.0288462	-0.0139431	0.0716355	0.315843	1	NA	NA	HTN3, HTN1, CSN1S2AP, C4orf40, ODAM, FDCSP, CSN3
227	4	4q13.3	4q13.3	0.0288462	0	0.0288462	-0.0139431	0.0716355	0.315843	1	NA	NA	CABS1, SMR3A, SMR3B, PROL1, MUC7, AMTN, AMBN, ENAM, IGJ, UTP3, RUFY3, snoU13.ENSG00000238318.1, GRSF1, MOB1B, DCK, SLC4A4, GC, RNA5SP163, NPFFR2, ADAMTS3, RNU4ATAC9P, RNU6ATAC5P, COX18, ANKRD17, SNORA3.ENSG00000221639.1, ALB
228	4	4q13.3	4q13.3	0.0288462	0	0.0288462	-0.0139431	0.0716355	0.315843	1	NA	NA	AFP, AFM, RASSF6, IL8, CXCL6
229	4	4q12-q21	4q21	0.0288462	0	0.0288462	-0.0139431	0.0716355	0.315843	1	NA	NA	PF4V1, CXCL1, PF4, PPBP, CXCL5, RN7SL218P, CXCL3, PPBPP2, CXCL2, MTHFD2L, EPGN, EREG, AREG, AREGB, BTC, PARM1, RCHY1, THAP6, C4orf26, CDKL2, G3BP2, USO1, PPEF2, NAAA, SDAD1, CXCL9, ART3, CXCL10, CXCL11, NUP54, SCARB2, FAM47E, CCDC158, SNORD50.ENSG00000199857.1, SHROOM3, MIR4450, MIR548AH, SOWAHB, SEPT11, CCNI, CCNG2, CXCL13, SNORD75.ENSG00000221711.1, CNOT6L, MRPL1, FRAS1, ANXA3, snoU13.ENSG00000…
230	4	4q21.21	4q21.21	0.0384615	0	0.0384615	-0.00911978	0.0860429	0.183345	1	NA	NA	C4orf22
231	4	4q21	4q22.1	0.0288462	0	0.0288462	-0.0139431	0.0716355	0.315843	1	NA	NA	BMP3, PRKG2, RASGEF1B, SNORA31.ENSG00000252762.1, HNRNPD, SNORD42.ENSG00000202440.1, HNRNPDL, ENOPH1, TMEM150C, LINC00575, SCD5, MIR575, SEC31A, THAP9, LIN54, snoR442.ENSG00000252834.1, COPS4, PLAC8, COQ2, HPSE, HELQ, MRPS18C, FAM175A, AGPAT9, CDS1, WDFY3, RN7SL552P, RN7SKP48, ARHGAP24, MIR4451, MAPK10, RN7SKP96, MIR4452, PTPN13, SLC10A6, C4orf36, AFF1, KLHL8, MIR5705, HSD17B13, HSD17B11, RN7SL68…
232	4	4q21.3	4q22	0.0192308	0	0.0192308	-0.0177854	0.0562469	0.562743	1	NA	NA	DSPP, DMP1, snoU13.ENSG00000238652.1, IBSP, MEPE, SPP1, PKD2, ABCG2, RNU6ATAC31P, PPM1K, HERC6, HERC5, HERC3, PIGY, PYURF, RN7SKP244, NAP1L5, FAM13A, TIGD2, GPRIN3, SNCA, MMRN1
233	4	4q22.1	4q22.1	0.0192308	0	0.0192308	-0.0177854	0.0562469	0.562743	1	NA	NA	CCSER1
234	4	4q22.1	4q22.3-q23	0.0192308	0	0.0192308	-0.0177854	0.0562469	0.562743	1	NA	NA	RN7SKP248, GRID2, RNA5SP164, ATOH1, SMARCAD1, HPGDS, PDLIM5, BMPR1B, UNC5C, PDHA2, RN7SKP28
235	4	4q22.3-q23	4q22.3-q23	0.0288462	0.0116279	0.0172182	-0.0327495	0.067186	0.75256	1	NA	NA	STPG2
236	4	4q23-q25	4q25	0.0192308	0	0.0192308	-0.0177854	0.0562469	0.562743	1	NA	NA	RAP1GDS1, TSPAN5, EIF4E, METAP1, MIR3684, ADH5, ADH4, PCNAP1, ADH6, ADH1A, ADH1B, ADH1C, ADH7, C4orf17, TRMT10A, MTTP, DAPP1, LAMTOR3, DNAJB14, H2AFZ, DDIT4L, EMCN, PPP3CA, MIR1255A, BANK1, SLC39A8, RN7SL728P, NFKB1, MANBA, UBE2D3, CISD2, snoU13.ENSG00000238948.1, SLC9B1, SLC9B2, BDH2, CENPE, TACR3
237	4	4q22-q24	4q25	0.0192308	0.0116279	0.00760286	-0.0347854	0.0499912	1	1	NA	NA	CXXC4, SNORA31.ENSG00000252136.1, TET2, RN7SL89P, PPA2
238	4	4q24	4q24	0.0192308	0	0.0192308	-0.0177854	0.0562469	0.562743	1	NA	NA	ARHGEF38, INTS12, GSTCD, NPNT
239	4	4q24	4q24	0.0288462	0	0.0288462	-0.0139431	0.0716355	0.315843	1	NA	NA	TBCK
240	4	4q24	4q24	0.0192308	0	0.0192308	-0.0177854	0.0562469	0.562743	1	NA	NA	AIMP1, GIMD1, DKK2, SNORD112.ENSG00000252566.1
241	4	4q24	4q24	0.0288462	0	0.0288462	-0.0139431	0.0716355	0.315843	1	NA	NA	PAPSS1
242	4	4q25	4q25	0.0192308	0	0.0192308	-0.0177854	0.0562469	0.562743	1	NA	NA	SGMS2, CYP2U1, HADH, LEF1, RPL34, OSTC, ETNPPL, COL25A1, SEC24B, RN7SL55P, MIR576, CCDC109B, CASP6, PLA2G12A, CFI, GAR1, RRH, LRIT3, EGF
243	4	4q25	4q25	0.0192308	0	0.0192308	-0.0177854	0.0562469	0.562743	1	NA	NA	ELOVL6
244	4	4q25	4q31.1	0.0192308	0	0.0192308	-0.0177854	0.0562469	0.562743	1	NA	NA	RN7SL275P, ENPEP, PITX2, MIR297, C4orf32, AP1AR, TIFA, ALPK1, NEUROG2, C4orf21, LARP7, MIR302A, MIR302B, MIR302C, MIR302D, MIR367, ANK2, RN7SL184P, CAMK2D, ARSJ, UGT8, MIR577, RN7SL808P, NDST4, MTRNR2L13, TRAM1L1, NT5C3AP1, NDST3, SNHG8, PRSS12, CEP170P1, METTL14, SEC24D, SYNPO2, MYOZ2, USP53, C4orf3, FABP2, PDE5A, SNORA11.ENSG00000221245.1, MAD2L1, PRDM5, NDNF, RN7SKP137, TNIP3, QRFPR, ANXA5, TM…
245	4	4q31.1	4q31.1	0.0192308	0	0.0192308	-0.0177854	0.0562469	0.562743	1	NA	NA	SCOC
246	4	4q31.1	4q31.1	0.0192308	0	0.0192308	-0.0177854	0.0562469	0.562743	1	NA	NA	SNORD112.ENSG00000252300.1, CLGN, ELMOD2, UCP1, RN7SL152P
247	4	4q31.21	4q31.21	0.0192308	0	0.0192308	-0.0177854	0.0562469	0.562743	1	NA	NA	TBC1D9, RNF150
248	4	4q31.21	4q31.23	0.0192308	0	0.0192308	-0.0177854	0.0562469	0.562743	1	NA	NA	ZNF330, snoU13.ENSG00000238695.1, IL15, INPP4B, USP38, GAB1, MIR3139, SMARCA5, GUSBP5, FREM3, GYPA, GYPB, GYPE, HHIP, ANAPC10, RN7SKP235, ABCE1, OTUD4, SMAD1, MMAA, C4orf51, ZNF827, LSM6, SLC10A7, POU4F2, TTC29, MIR548G, EDNRA, TMEM184C, PRMT10
249	4	4q31.23	4q31.23	0.0288462	0	0.0288462	-0.0139431	0.0716355	0.315843	1	NA	NA	ARHGAP10
250	4	4q31.23	4q31.3	0.0192308	0	0.0192308	-0.0177854	0.0562469	0.562743	1	NA	NA	RNA5SP165, MIR4799, RN7SL254P, NR3C2, RNA5SP166
251	4	4q31.3	4q31.3	0.0192308	0	0.0192308	-0.0177854	0.0562469	0.562743	1	NA	NA	RNA5SP167
252	4	4q31.3	4q32.3	0.0192308	0	0.0192308	-0.0177854	0.0562469	0.562743	1	NA	NA	DCLK2, LRBA, MAB21L2, RNA5SP168, RPS3A, SH3D19, SNORD73A, SNORD73, PRSS48, FAM160A1, RN7SKP35, PET112, RNA5SP169, RN7SL446P, FBXW7, MIR3140, MIR4453, TMEM154, TIGD4, ARFIP1, FHDC1, TRIM2, MND1, RN7SL419P, KIAA0922, TLR2, RNF175, SFRP2, DCHS2, PLRG1, FGB, FGA, FGG, LRAT, RBM46, NPY2R, MAP9, GUCY1A3, GUCY1B3, ASIC5, TDO2, CTSO, PDGFC, GLRB, GRIA2, FAM198B, TMEM144, RXFP1, C4orf46, ETFDH, U3.ENSG000…
253	4	4q33	4q33	0.0192308	0	0.0192308	-0.0177854	0.0562469	0.562743	1	NA	NA	NEK1, CLCN3
254	4	4q33	4q35.1	0.0192308	0	0.0192308	-0.0177854	0.0562469	0.562743	1	NA	NA	C4orf27, MFAP3L, AADAT, HSP90AA6P, RNU6ATAC13P, GALNTL6, RN7SL253P, GALNT7, MIR548T, HMGB2, SAP30, SCRG1, HAND2, FBXO8, CEP44, MIR4276, HPGD, GLRA3, ADAM29, GPM6A, WDR17, SNORA51.ENSG00000201516.1, SPATA4, ASB5, SPCS3, VEGFC, RN7SKP136, NEIL3, AGA, RNA5SP172, snoU13.ENSG00000252388.1, RNA5SP173, SNORD65.ENSG00000212191.1, LINC00290, RN7SKP13, TENM3, MIR1305, DCTD, FAM92A1P2, RN7SKP67, U3.ENSG0000…
255	4	4q35	4q35	0.0288462	0	0.0288462	-0.0139431	0.0716355	0.315843	1	NA	NA	PDLIM3
256	4	4q35.1	4q35.2	0.0192308	0	0.0192308	-0.0177854	0.0562469	0.562743	1	NA	NA	SORBS2, snoU13.ENSG00000239034.1, TLR3, FAM149A, SNORA31.ENSG00000253013.1, CYP4V2, KLKB1, F11, MTNR1A, FAT1, DUX4L2, DUX4L3, DUX4L4, DUX4L5, DUX4L6, DUX4L7, DUX4, FRG1, FRG2, HSP90AA4P, RNA5SP174, RNA5SP175, TRIML1, TRIML2, ZFP42
257	5	5p15.3	5p15.32	0.0192308	0	0.0192308	-0.0177854	0.0562469	0.562743	1	NA	NA	AHRR, BRD9, C5orf55, CCDC127, CEP72, EXOC3, LRRC14B, MIR4456, PDCD6, PLEKHG4B, SDHA, SLC9A3, TPPP, TRIP13, ZDHHC11B, ZDHHC11, NKD2, MIR4635, SLC12A7, SLC6A18, SLC6A19, TERT, MIR4457, CLPTM1L, SLC6A3, IRX4, LPCAT1, MIR4277, MRPL36, NDUFS6, SDHAP3, C5orf38, IRX2, IRX1, RN7SKP73, ADAMTS16, KIAA0947
258	5	5p15.31	5p15.3	0.0288462	0	0.0288462	-0.0139431	0.0716355	0.315843	1	NA	NA	MED10, UBE2QL1, NSUN2, SRD5A1, PAPD7, RN7SKP79, RNA5SP176, ADCY2
259	5	5p15.31	5p15.2	0.0192308	0	0.0192308	-0.0177854	0.0562469	0.562743	1	NA	NA	C5orf49, MTRR, FASTKD3, MIR4458, SEMA5A, MIR4636, SNORD123, TAS2R1, RNA5SP177, FAM173B, CCT5
260	5	5p15.2	5p15.2	0.0192308	0	0.0192308	-0.0177854	0.0562469	0.562743	1	NA	NA	CMBL, MARCH6, ROPN1L, ANKRD33B, DAP, CTNND2
261	5	5p15.2	5p15.2	0.0192308	0	0.0192308	-0.0177854	0.0562469	0.562743	1	NA	NA	CT49
262	5	5p15.2	5p15.2	0.0288462	0	0.0288462	-0.0139431	0.0716355	0.315843	1	NA	NA	DNAH5
263	5	5p15.2	5p14.3	0.0192308	0	0.0192308	-0.0177854	0.0562469	0.562743	1	NA	NA	TRIO, FAM105A, FAM105B, ANKH, MIR4637, U8.ENSG00000202269.1, FBXL7, MIR887, RNA5SP178, MARCH11, ZNF622, FAM134B, MYO10, RNA5SP179, BASP1, RNA5SP180, FTH1P10, RN7SKP133, SNORD81.ENSG00000212278.1
264	5	5p14.3	5p14.3	0.00961538	0	0.00961538	-0.018755	0.0379858	1	1	NA	NA	RN7SL58P
265	5	5p14.3	5p14.3	0.0192308	0	0.0192308	-0.0177854	0.0562469	0.562743	1	NA	NA	snoU13.ENSG00000238674.1
266	5	5p14.3	5p14.3	0.0192308	0.0116279	0.00760286	-0.0347854	0.0499912	1	1	NA	NA	CDH18
267	5	5p14.3	5p13.2	0.0192308	0	0.0192308	-0.0177854	0.0562469	0.562743	1	NA	NA	GUSBP1, CDH12, PMCHL1, RN7SL572P, PRDM9, C5orf17, SNORA40.ENSG00000252083.1, CDH10, SNORD29, CDH9, SNORA18.ENSG00000252601.1, RN7SKP207, CDH6, DROSHA, C5orf22, PDZD2, snoU13.ENSG00000238864.1, MIR4279, GOLPH3, MTMR12, ZFR, MIR579, SUB1, NPR3, TARS, ADAMTS12, RXFP3, AMACR, C1QTNF3, RAI14, SLC45A2, TTC23L
268	5	5p13.2	5p13.1	0.00961538	0	0.00961538	-0.018755	0.0379858	1	1	NA	NA	RAD1, BRIX1, DNAJC21, AGXT2, PRLR, U3.ENSG00000201368.1, SPEF2, IL7R, CAPSL, UGT3A1, UGT3A2, LMBRD2, MIR580, SKP2, NADK2, RANBP3L, RNA5SP181, SLC1A3, NIPBL, C5orf42, RN7SL37P, NUP155
269	5	5p13.2	5q11	0.0192308	0	0.0192308	-0.0177854	0.0562469	0.562743	1	NA	NA	WDR70, GDNF, EGFLAM, LIFR, MIR3650, OSMR, RICTOR, FYB, C9, DAB2, LINC00603, LINC00604, SNORA63.ENSG00000199552.1, PTGER4, TTC33, PRKAA1, SNORA57.ENSG00000212567.1, RPL37, SNORD72, CARD6, C7, MROH2B, C6, PLCXD3, OXCT1, C5orf51, FBXO4, GHR, CCDC152, SEPP1, ANXA2R, ZNF131, NIM1, HMGCS1, CCL28, C5orf28, C5orf34, PAIP1, NNT, FGF10, RN7SL383P, MRPS30
270	5	5p12	5q11.1	0.0288462	0	0.0288462	-0.0139431	0.0716355	0.315843	1	NA	NA	HCN1, EMB, PARP8
271	5	5q11.1	5q11.2	0.0192308	0	0.0192308	-0.0177854	0.0562469	0.562743	1	NA	NA	snoU13.ENSG00000238702.1, ISL1, RNA5SP182
272	5	5q11.2	5q11.2	0.0288462	0	0.0288462	-0.0139431	0.0716355	0.315843	1	NA	NA	ITGA1, PELO, ITGA2, MOCS2, FST, NDUFS4, ARL15, MIR581, RN7SL801P, MIR4459, HSPB3, SNX18, ESM1, GZMK, GZMA, CDC20B, GPX8, MIR449A, MIR449B, MIR449C, MCIDAS, CCNO, DHX29, SKIV2L2, PPAP2A, MIR5687, SLC38A9, DDX4, RNA5SP183, IL31RA
273	5	5q11.2	5q11.2	0.0384615	0	0.0384615	-0.00911978	0.0860429	0.183345	1	NA	NA	IL6ST, snoU13.ENSG00000238326.1, ANKRD55, RNA5SP184
274	5	5q11.2	5q11.2	0.0288462	0	0.0288462	-0.0139431	0.0716355	0.315843	1	NA	NA	RNA5SP185
275	5	5q11.2	5q12.1-q13.2	0.0384615	0	0.0384615	-0.00911978	0.0860429	0.183345	1	NA	NA	RNU6ATAC2P, MAP3K1, snoU13.ENSG00000238717.1, SETD9, MIER3, GPBP1, ACTBL2, snoU13.ENSG00000238899.1
276	5	5q12.1-q13.2	5q13	0.0288462	0	0.0288462	-0.0139431	0.0716355	0.315843	1	NA	NA	PLK2, GAPT, MIR548AE2, RAB3C
277	5	5q12	5q12	0.0288462	0.0232558	0.00559034	-0.0452702	0.0564509	1	1	NA	NA	PDE4D
278	5	5q12.1	5q12.1	0.0288462	0	0.0288462	-0.0139431	0.0716355	0.315843	1	NA	NA	MIR582
279	5	5q13.3	5q12.1	0.0192308	0	0.0192308	-0.0177854	0.0562469	0.562743	1	NA	NA	FKSG52, PART1, DEPDC1B, ELOVL7
280	5	5q12.1	5q12.1	0.0288462	0	0.0288462	-0.0139431	0.0716355	0.315843	1	NA	NA	ERCC8, NDUFAF2, SMIM15
281	5	5q12.1	5q12.1	0.0480769	0	0.0480769	-0.00365976	0.0998136	0.108405	1	NA	NA	ZSWIM6, C5orf64
282	5	5q12.1	5q12.3	0.0384615	0	0.0384615	-0.00911978	0.0860429	0.183345	1	NA	NA	RN7SKP157, KIF2A, DIMT1, IPO11, CKS1B.ENSG00000268942.1, LRRC70, HTR1A, RNF180
283	5	5q12.3	5q12.3	0.0288462	0	0.0288462	-0.0139431	0.0716355	0.315843	1	NA	NA	RGS7BP, RN7SL169P, FAM159B, SREK1IP1
284	5	5q12.3	5q12.3	0.0384615	0	0.0384615	-0.00911978	0.0860429	0.183345	1	NA	NA	CWC27, ADAMTS6, CENPK, PPWD1, TRIM23, TRAPPC13, SGTB, NLN, ERBB2IP, SNORA76.ENSG00000252904.1
285	5	5q12.3	5q13.1	0.0480769	0	0.0480769	-0.00365976	0.0998136	0.108405	1	NA	NA	SREK1, snoU13.ENSG00000238400.1, MAST4, CD180, PIK3R1
286	5	5q13.1	5q13.2	0.0480769	0.0116279	0.036449	-0.0211173	0.0940153	0.310917	1	NA	NA	U8.ENSG00000212249.2, X7SK.ENSG00000249352.3, SLC30A5, RN7SL103P, SNORA50.ENSG00000220986.1, CCNB1, snoU13.ENSG00000238334.1, CENPH, MRPS36, CDK7, CCDC125
287	5	5q13.2	5q14.2	0.0673077	0.0232558	0.0440519	-0.0243058	0.11241	0.280255	1	NA	NA	TAF9, RAD17, MARVELD2, GTF2H2B, GTF2H2C, GTF2H2, GUSBP3, NAIP, OCLN, RN7SL476P, RN7SL616P, RN7SL9P, SERF1A, SERF1B, SMN1, SMN2, snoU13.ENSG00000238451.1, snoU13.ENSG00000238740.1, PMCHL2, BDP1, MCCC2, CARTPT, MAP1B, MIR4803, MRPS27, RN7SL153P, PTCD2, ZNF366, TNPO1, MIR4804, FCHO2, TMEM171, TMEM174, FOXD1, BTF3, ANKRA2, UTP15, ARHGEF28, RN7SL814P, ENC1, HEXB, GFM2, NSA2, FAM169A, SNORA40.ENSG00000…
288	5	5q14.2	5q14.3	0.0769231	0.0232558	0.0536673	-0.0172651	0.1246	0.185961	1	NA	NA	ATP6AP1L, TMEM167A, SCARNA18.ENSG00000238835.1, XRCC4, VCAN
289	5	5q14.3	5q14	0.0673077	0.0348837	0.032424	-0.0400252	0.104873	0.502922	1	NA	NA	HAPLN1, RN7SKP295
290	5	5q14	5q14	0.0769231	0.0348837	0.0420394	-0.0328208	0.1169	0.356015	1	NA	NA	EDIL3
291	5	5q14.3	5q14.3	0.0769231	0.0348837	0.0420394	-0.0328208	0.1169	0.356015	1	NA	NA	NBPF22P, COX7C, MIR3607
292	5	5q14.3	5q14.3	0.0961538	0.0465116	0.0496422	-0.0330287	0.132313	0.305483	1	NA	NA	RN7SKP34, MIR4280, RASA1, RN7SL629P, CCNH, TMEM161B, RNA5SP187, SNORA70.ENSG00000206958.1, LINC00461, MEF2C, MIR3660, CETN3, MBLAC2, POLR3G, LYSMD3, GPR98, LUCAT1, ARRDC3
293	5	5q14	5q14	0.0865385	0.0465116	0.0400268	-0.0406006	0.120654	0.424225	1	NA	NA	NR2F1
294	5	5q15	5q15	0.0961538	0.0465116	0.0496422	-0.0330287	0.132313	0.305483	1	NA	NA	FAM172A
295	5	5q15	5q15	0.0865385	0.0465116	0.0400268	-0.0406006	0.120654	0.424225	1	NA	NA	MIR2277, POU5F2
296	5	5q15	5q15	0.0961538	0.0465116	0.0496422	-0.0330287	0.132313	0.305483	1	NA	NA	KIAA0825
297	5	5q15	5q15	0.0865385	0.0465116	0.0400268	-0.0406006	0.120654	0.424225	1	NA	NA	ANKRD32
298	5	5q15	5q15	0.0865385	0.0581395	0.0283989	-0.0554747	0.112273	0.640599	1	NA	NA	MCTP1
299	5	5q15	5q15	0.0865385	0.0465116	0.0400268	-0.0406006	0.120654	0.424225	1	NA	NA	FAM81B
300	5	5q15	5q21	0.0961538	0.0465116	0.0496422	-0.0330287	0.132313	0.305483	1	NA	NA	TTC37, ARSK, GPR150, RFESD, SPATA9, RHOBTB3, GLRX, C5orf27, ELL2, MIR583, PCSK1, CAST, ERAP1, ERAP2, LNPEP, LIX1, RIOK2, RGMB, CHD1, FAM174A, RN7SKP62, ST8SIA4, MIR548P, RN7SL802P, RNA5SP188, SLCO4C1, RN7SKP68, SLCO6A1, LINC00492, LINC00491, PAM, GIN1, PPIP5K2, C5orf30, NUDT12, RN7SL255P, RNA5SP189
301	5	5q21	5q23-q31	0.115385	0.0465116	0.068873	-0.0175851	0.155331	0.150101	1	NA	NA	SNORA31.ENSG00000252337.1, EFNA5, RN7SL782P, RN7SKP122, FBXL17, FER, PJA2, MAN2A1, RN7SKP230, TMEM232, MIR548F3, SNORA51.ENSG00000207177.1, SLC25A46, TSLP, WDR36, CAMK4, STARD4, NREP, RN7SKP57, EPB41L4A, SNORA13, FLJ11235, APC, SRP19, REEP5, ZRSR1, DCP2, MCC, TSSK1B, RNU4ATAC13P, YTHDC2, RN7SKP89, KCNN2, TRIM36, PGGT1B, CCDC112, FEM1C, TICAM2, TMED7, CDO1, ATG12, AP3S1, AQPEP, ARL14EPL, COMMD10, …
302	5	5q23.3	5q23.3	0.125	0.0465116	0.0784884	-0.00972806	0.166705	0.102813	1	NA	NA	SLC27A6
303	5	5q22.1-q33.3	5q31.2	0.125	0.0465116	0.0784884	-0.00972806	0.166705	0.102813	1	NA	NA	ISOC1, MIR4633, MIR4460, ADAMTS19, KIAA1024L, CHSY3, RNU6ATAC10P, RNA5SP191, HINT1, LYRM7, CDC42SE2, RAPGEF6, FNIP1, ACSL6, IL3, CSF2, snoZ6.ENSG00000253067.1, P4HA2, PDLIM4, SLC22A4, MIR3936, SLC22A5, C5orf56, IRF1, IL5, RAD50, IL13, IL4, KIF3A, CCNI2, SEPT8, SOWAHA, SHROOM1, RNA5SP192, GDF9, UQCRQ, LEAP2, AFF4, ZCCHC10, HSPA4, FSTL4, snoU13.ENSG00000238796.1, C5orf15, VDAC1, TCF7, SKP1, PPP2CA,…
304	5	5q31	5q31	0.134615	0.0465116	0.0881038	-0.001789	0.177997	0.0694809	1	NA	NA	SIL1
305	5	5q31	5q31.2	0.125	0.0465116	0.0784884	-0.00972806	0.166705	0.102813	1	NA	NA	RNA5SP194
306	5	5q31.2	5q31.2	0.134615	0.0465116	0.0881038	-0.001789	0.177997	0.0694809	1	NA	NA	MATR3, SNORA74.ENSG00000252213.1, SNORA74A
307	5	5q31.2	5q33.3	0.125	0.0465116	0.0784884	-0.00972806	0.166705	0.102813	1	NA	NA	RNA5SP195, RN7SKP64, PAIP2, SLC23A1, MZB1, PROB1, SPATA24, DNAJC18, ECSCR, TMEM173, UBE2D2, CXXC5, PSD2, NRG2, PURA, IGIP, CYSTM1, PFDN1, HBEGF, SLC4A9, ANKHD1, SNORD45.ENSG00000200051.1, SRA1, EIF4EBP3, APBB3, SLC35A4, SNORA27.ENSG00000200235.1, CD14, NDUFA2, TMCO6, IK, MIR3655, WDR55, DND1, HARS, HARS2, ZMAT2, PCDHA1, PCDHA2, PCDHA3, PCDHA4, PCDHA10, PCDHA11, PCDHA14, PCDHA5, PCDHA6, PCDHA7, PC…
308	5	5q33.2	5q33.2	0.0961538	0.0465116	0.0496422	-0.0330287	0.132313	0.305483	1	NA	NA	HAVCR1
309	5	5q33.3	5q33.3	0.0961538	0.0465116	0.0496422	-0.0330287	0.132313	0.305483	1	NA	NA	HAVCR2, MED7, ITK, FAM71B, CYFIP2, FNDC9, ADAM19, NIPAL4, SOX30, C5orf52, THG1L, LSM11, CLINT1
310	5	5q34	5q34	0.0961538	0.0348837	0.0612701	-0.0180099	0.14055	0.168692	1	NA	NA	EBF1, RNF145, SNORA68.ENSG00000252458.1, UBLCP1, IL12B, RNU4ATAC2P, ADRA1B, TTC1, PWWP2A, FABP6, CCNJL, RN7SL295P, C1QTNF2, C5orf54, SLU7, PTTG1, MIR146A, MIR3142, ATP10B
311	5	5q34	5q34	0.0769231	0.0232558	0.0536673	-0.0172651	0.1246	0.185961	1	NA	NA	GABRB2, GABRA6
312	5	5q34	5q35.1	0.0576923	0.0232558	0.0344365	-0.0311641	0.100037	0.415875	1	NA	NA	GABRA1, GABRG2, CCNG1, NUDCD2, HMMR, MAT2B, RN7SKP60, TENM2, SNORA40.ENSG00000253065.1, WWC1, RARS, FBLL1, PANK3, MIR103A1, SLIT3, MIR585, SPDL1, DOCK2, FAM196B, MIR378E, FOXI1, C5orf58, LCP2, KCNIP1, KCNMB1, MIR4454, GABRP, RANBP17, RN7SL623P, snoU13.ENSG00000252387.1, TLX3, RN7SL339P
313	5	5q35.1	5q35.2	0.0480769	0	0.0480769	-0.00365976	0.0998136	0.108405	1	NA	NA	SNORA70.ENSG00000206909.1, MIR3912, NPM1, FGF18, C5orf50, FBXW11, EFCAB9, STK10, UBTD2, SNORA57.ENSG00000212529.1, SH3PXD2B, NEURL1B, MIR5003, DUSP1, ERGIC1, RPL26L1, ATP6V0E1, SNORA74B, CREBRF, BNIP1, RNA5SP200, STC2, BOD1, CPEB4, C5orf47, NSG2, MIR4634, MSX2, DRD1, snoU13.ENSG00000239026.1, SFXN1, RN7SKP148, HRH2, CPLX2, THOC3, FAM153B, SIMC1, KIAA1191, ARL10, MIR1271, NOP16, HIGD2A, CLTB, FAF2…
314	5	5q35	5q35	0.0576923	0	0.0576923	0.00225944	0.113125	0.0647832	1	NA	NA	NSD1
315	5	5q35.3	5q35.3	0.0480769	0	0.0480769	-0.00365976	0.0998136	0.108405	1	NA	NA	MXD3, RAB24, PRELID1, LMAN2, RN7SL562P, RGS14, SLC34A1, F12, GRK6, PFN3, PRR7, DBN1, PDLIM7, DOK3, DDX41, FAM193B, TMED9, B4GALT7, FAM153A
316	5	5q35.3	5q35.3	0.0480769	0.0116279	0.036449	-0.0211173	0.0940153	0.310917	1	NA	NA	PROP1, FAM153C
317	5	5q35.3	5q35.3	0.0480769	0.0116279	0.036449	-0.0211173	0.0940153	0.310917	1	NA	NA	N4BP3, RMND5B, NHP2, HNRNPAB, PHYKPL, COL23A1, RN7SL646P, CLK4, RN7SKP70, ZNF354A, AACSP1, ZNF354B, ZFP2, ZNF454, GRM6, ZNF879, ZNF354C, ADAMTS2, RN7SL71P, RUFY1, HNRNPH1, C5orf60, CANX, CBY3, HMGB3P22, MAML1, LTC4S, MGAT4B, MIR1229, SQSTM1, C5orf45, RN7SKP150, TBC1D9B, RNF130, MIR340, RASGEF1C, MAPK9, GFPT2, CNOT6, SCGB3A1, FLT4, MGAT1, OR2Y1, LINC00847, ZFP62, BTNL8, BTNL3, BTNL9, GNB2L1, MIR46…
318	6	6p25.3	6p25-p23	0	0	0	0	0	NA	NA	NA	NA	DUSP22, EXOC2, HUS1B, IRF4
319	6	6p25-p23	6p25	0	0	0	0	0	NA	NA	NA	NA	snoU13.ENSG00000238438.1, FOXQ1, FOXF2, RN7SL352P, FOXC1
320	6	6p25	6p25	0	0.0116279	-0.0116279	-0.0449069	0.0216511	0.923984	1	NA	NA	GMDS
321	6	6p25.2	6p25.2	0	0	0	0	0	NA	NA	NA	NA	C6orf195, MYLK4, WRNIP1, SERPINB1, MIR4645, SERPINB9, SERPINB6, NQO2, RIPK1, RNA5SP201, BPHL, TUBB2A, TUBB2B, PSMG4, SLC22A23, PXDC1, FAM50B
322	6	6p25.2	6p24.3	0	0	0	0	0	NA	NA	NA	NA	C6ORF50, PRPF4B, FAM217A, snoU13.ENSG00000252668.1, C6orf201, ECI2, RNA5SP202, snoU13.ENSG00000238801.1, CDYL, RPP40, RMRPP2, PPP1R3G, LYRM4, MIR3691, FARS2, RN7SL221P, NRN1, F13A1, MIR5683, LY86, RN7SL554P, snoU13.ENSG00000251762.1, RREB1, SSR1, CAGE1, RIOK1, DSP, SNRNP48, BMP6, TXNDC5, BLOC1S5, EEF1E1, SLC35B3, HULC
323	6	6p24.3	6p24.3	0	0.0116279	-0.0116279	-0.0449069	0.0216511	0.923984	1	NA	NA	OFCC1
324	6	6p24.3	6p24.2	0	0	0	0	0	NA	NA	NA	NA	RNU6ATAC21P, TFAP2A, LINC00518, MIR5689, GCNT2, C6orf52, GCNT6, PAK1IP1, TMEM14C, SYCP2L, TMEM14B, RNA5SP203, MAK, GCM2, ELOVL2, snoU13.ENSG00000238896.1, SMIM13
325	6	6p25-p24	6p25-p24	0.00961538	0	0.00961538	-0.018755	0.0379858	1	1	NA	NA	NEDD9
326	6	6p24.2	6p21.3	0	0	0	0	0	NA	NA	NA	NA	TMEM170B, SNORA67.ENSG00000207419.1, ADTRP, HIVEP1, EDN1, RN7SKP293, PHACTR1, TBC1D7, GFOD1, RN7SKP204, SIRT5, NOL7, RANBP9, MCUR1, RNF182, CD83, RN7SL332P, JARID2, DTNBP1, MYLIP, MIR4639, U3.ENSG00000251793.1, GMPR, ATXN1, STMND1, RBM24, CAP2, FAM8A1, NUP153, RNA5SP204, KIF13A, NHLRC1, TPMT, KDM1B, DEK, RNF144B, snoU13.ENSG00000238458.1, MIR548A1, RNA5SP205, ID4, MBOAT1, E2F3, RN7SL128P, CDKAL1,…
327	6	6p22.1	6p22.1	0	0	0	0	0	NA	NA	NA	NA	HIST1H2BC, HIST1H2AC, HIST1H1E, HIST1H2BD, HIST1H2BE, HIST1H4D, HIST1H3D, HIST1H2AD, HIST1H2BF, HIST1H4E, HIST1H2BG, HIST1H2AE, HIST1H3E, HIST1H1D, HIST1H4F, HIST1H4G, HIST1H3F, HIST1H2BH, HIST1H2BI, HIST1H3G, HIST1H4H
328	6	6p22.1	6p21.33	0	0	0	0	0	NA	NA	NA	NA	BTN3A2, BTN2A2, BTN3A1, BTN2A1, BTN2A3P, BTN3A3, BTN1A1, HCG11, HMGN4, ABT1, ZNF322, GUSBP2, LINC00240, TRNAI2, HIST1H2BJ, HIST1H2AG, HIST1H2BK, HIST1H4I, HIST1H2AH, MIR3143, PRSS16, POM121L2, ZNF391, ZNF184, TRNAI6, HIST1H2AI, HIST1H2AJ, HIST1H2BL, HIST1H2BM, HIST1H3H, HIST1H4J, HIST1H4K, HIST1H2AK, HIST1H2BN, HIST1H2AL, HIST1H1B, HIST1H3I, HIST1H4L, HIST1H3J, HIST1H2AM, HIST1H2BO, OR2B2, OR2B6,…
329	6	6p21.3	6p21.3	0	0	0	0	0	NA	NA	NA	NA	DDR1
330	6	6p21.3	6p21.3	0	0	0	0	0	NA	NA	NA	NA	RN7SKP186
331	6	6p21.3	6p21.32	0	0	0	0	0	NA	NA	NA	NA	MIR4640, GTF2H4, RN7SL175P, VARS2, SFTA2, DPCR1, HCG21, MUC21
332	6	6p21.33	6p21.1	0	0	0	0	0	NA	NA	NA	NA	MUC22, HCG22, C6orf15, CDSN, PSORS1C1, PSORS1C2, CCHCR1, TCF19, POU5F1, PSORS1C3, HCG27, ABHD16A, AGER, AGPAT1, AIF1, APOM, ATF6B, ATP6V1G2, BAG6, BTNL2, C2, C4A, C4B, C6orf10, C6orf25, C6orf47, C6orf48, CFB, CLIC1, CSNK2B, CYP21A1P, CYP21A2, DDAH2, DDX39B, DOM3Z, EGFL8, EHMT2, FKBPL, GPANK1, GPSM3, HCG23, HCP5, HSPA1A, HSPA1B, HSPA1L, LSM2, LST1, LTA, LTB, LY6G5B, LY6G5C, LY6G6C, LY6G6D, LY6G6E,…
333	6	6p21.1	6p21.1	0.00961538	0	0.00961538	-0.018755	0.0379858	1	1	NA	NA	CRIP3, ZNF318
334	6	6p21.1	6q11.1	0	0	0	0	0	NA	NA	NA	NA	ABCC10, DLK2, TJAP1, LRRC73, POLR1C, YIPF3, XPO5, SCARNA15.ENSG00000252218.1, POLH, GTPBP2, MAD2L1BP, RSPH9, MRPS18A, VEGFA, C6orf223, MRPL14, TMEM63B, CAPN11, SLC29A1, HSP90AB1, MIR4647, SLC35B2, NFKBIE, TMEM151B, TCTE1, AARS2, SPATS1, CDC5L, MIR4642, SUPT3H, MIR586, RUNX2, CLIC5, ENPP4, ENPP5, RCAN2, CYP39A1, SLC25A27, TDRD6, PLA2G7, ANKRD66, MEP1A, GPR116, GPR110, TNFRSF21, CD2AP, GPR111, GPR1…
335	6	6q11.1	6pter-q22.33	0	0	0	0	0	NA	NA	NA	NA	MTRNR2L9, KHDRBS2, FKBP1C, LGSN
336	6	6q12	6q12-q13	0	0	0	0	0	NA	NA	NA	NA	PTP4A1, PHF3, EYS, SNORD65.ENSG00000212229.1, RNA5SP208, BAI3, LMBRD1, COL19A1, COL9A1, FAM135A, C6orf57, SMAP1, B3GAT2, U3.ENSG00000221345.1, OGFRL1, LINC00472, MIR30C2, MIR30A, RIMS1
337	6	6q14	6q14	0	0.0116279	-0.0116279	-0.0449069	0.0216511	0.923984	1	NA	NA	KCNQ5
338	6	6q14	6q13	0	0	0	0	0	NA	NA	NA	NA	MIR4282, KHDC1L, KHDC1, DPPA5, KHDC3L, OOEP, DDX43, snoU13.ENSG00000238464.1, MB21D1, MTO1, EEF1A1, SLC17A5
339	6	6q13	6q13	0	0	0	0	0	NA	NA	NA	NA	CD109
340	6	6q12-q13	6q16.1	0	0	0	0	0	NA	NA	NA	NA	COL12A1, COX7A2, TMEM30A, FILIP1, U3.ENSG00000221332.1, MIR4463, SENP6, RN7SKP163, MYO6, RNA5SP209, snoU13.ENSG00000239132.1, IMPG1, U6.ENSG00000272445.1, HTR1B, SNORD112.ENSG00000252932.1, IRAK1BP1, PHIP, HMGN3, LCA5, SH3BGRL2, ELOVL4, TTK, BCKDHB, FAM46A, RNA5SP210, SNORA70.ENSG00000206886.1, IBTK, TPBG, UBE3D, DOPEY1, PGM3, RWDD2A, ME1, PRSS35, SNAP91, RIPPLY2, CYB5R4, MRAP2, KIAA1009, TBX18, …
341	6	6q14.3-q16.1	6q14.3-q16.1	0.00961538	0	0.00961538	-0.018755	0.0379858	1	1	NA	NA	ORC3
342	6	6q15	6q16.3	0	0	0	0	0	NA	NA	NA	NA	AKIRIN2, snoU13.ENSG00000238628.1, RN7SL183P, SPACA1, CNR1, RNGTT, SNORA73.ENSG00000222145.1, PNRC1, RN7SL336P, SRSF12, PM20D2, GABRR1, GABRR2, UBE2J1, RRAGD, ANKRD6, RN7SL11P, LYRM2, MDN1, CASP8AP2, snoU13.ENSG00000238747.1, GJA10, BACH2, RN7SKP110, MIR4464, MAP3K7, MIR4643, RN7SL415P, U3.ENSG00000200492.1, U3.ENSG00000221455.1, EPHA7, SNORA18.ENSG00000252249.1, MANEA, FUT9, RN7SL797P, UFL1, FHL…
343	6	6q16.3	6q16.3	0	0.0116279	-0.0116279	-0.0449069	0.0216511	0.923984	1	NA	NA	GRIK2
344	6	6q16.3	6q21	0	0	0	0	0	NA	NA	NA	NA	SNORA33.ENSG00000202283.1, HACE1, LINC00577, LIN28B, BVES, POPDC3, PREP, RN7SKP211, PRDM1, ATG5, RN7SL47P, RNA5SP211, AIM1, RTN4IP1, QRSL1, MIR587, C6orf203, BEND3, PDSS2, SOBP, SCML4
345	6	6q21	6q21	0	0	0	0	0	NA	NA	NA	NA	SEC63, SNORA73.ENSG00000253090.1, OSTM1, NR2E1
346	6	6q21	6q21	0	0	0	0	0	NA	NA	NA	NA	SNX3, snoU13.ENSG00000238974.1, RNA5SP212, LACE1, FOXO3, LINC00222, ZNF259P1, ARMC2, SESN1, CEP57L1, C6orf183, CCDC162P, snoU13.ENSG00000238474.1, CD164, PPIL6, SMPD2, MICAL1, ZBTB24, AK9
347	6	6q21	6q21	0	0	0	0	0	NA	NA	NA	NA	FIG4, GPR6, WASF1
348	6	6q21	6q22.31	0	0	0	0	0	NA	NA	NA	NA	CDC40, METTL24, DDO, SLC22A16, RN7SL617P, CDK19, SNORA40.ENSG00000212587.1, AMD1, GTF3C6, snoU13.ENSG00000238775.1, RPF2, SLC16A10, KIAA1919, REV3L, TRAF3IP2, C6orf3, snoU13.ENSG00000239015.1, FYN, WISP3, TUBE1, FAM229B, LAMA4, RFPL4B, snoU13.ENSG00000239095.1, U3.ENSG00000253091.1, snoU13.ENSG00000238563.1, MARCKS, HDAC2, HS3ST5, RNA5SP213, FRK, NT5DC1, COL10A1, TSPYL4, DSE, TSPYL1, FAM26F, TRAP…
349	6	6q22	6q22	0.00961538	0	0.00961538	-0.018755	0.0379858	1	1	NA	NA	MAN1A1, MIR3144
350	6	6q22	6q22	0	0	0	0	0	NA	NA	NA	NA	RNA5SP215
351	6	6q22.31	6q22.31	0	0.0116279	-0.0116279	-0.0449069	0.0216511	0.923984	1	NA	NA	TBC1D32
352	6	19q13.3	6q23.2	0	0	0	0	0	NA	NA	NA	NA	SIGLECP3, GJA1, HSF2, SERINC1, PKIB, RN7SL564P, FABP7, SMPDL3A, CLVS2, TRDN, NKAIN2, RNF217, TPD52L1, HDDC2, HEY2, NCOA7, RN7SKP56, HINT3, RNA5SP216, TRMT11, CENPW, MIR588, PRELID1P1, RSPO3, RNF146, ECHDC1, RNA5SP217, SOGA3, KIAA0408, C6orf58, THEMIS, PTPRK, snoU13.ENSG00000238938.1, LAMA2, ARHGAP18, TMEM244, L3MBTL3, SAMD3, TMEM200A, SMLR1, EPB41L2, AKAP7, ARG1, MED23, ENPP3, OR2A4, CTAGE9, MIR5…
353	6	6q23	6q23	0.00961538	0	0.00961538	-0.018755	0.0379858	1	1	NA	NA	EYA4
354	6	6q23.2	6q23.2	0	0	0	0	0	NA	NA	NA	NA	TCF21, TBPL1, SLC2A12, RN7SL408P, SGK1, snoU13.ENSG00000238631.1, RNA5SP218, ALDH8A1
355	6	6q23.3	6q23.3	0	0	0	0	0	NA	NA	NA	NA	HBS1L
356	6	6q22-q23	6q23.3	0	0	0	0	0	NA	NA	NA	NA	MYB, MIR548A2, AHI1
357	6	6q23.3	6q23.3	0	0	0	0	0	NA	NA	NA	NA	LINC00271, PDE7B, COX5BP2, MTFR2, BCLAF1, MAP7, X7SK.ENSG00000271765.1, MAP3K5, RNA5SP219, PEX7, SNORA27.ENSG00000201807.1, SLC35D3, IL20RA, IL22RA2, IFNGR1
358	6	6q23.3	6q23.3	0.00961538	0	0.00961538	-0.018755	0.0379858	1	1	NA	NA	OLIG3
359	6	6q23.3	6q25	0	0	0	0	0	NA	NA	NA	NA	SNORD112.ENSG00000252476.1, TNFAIP3, PERP, KIAA1244, PBOV1, HEBP2, NHSL1, MIR3145, CCDC28A, ECT2L, REPS1, ABRACL, HECA, TXLNB, CITED2, RNA5SP220, MIR3668, MIR4465, RN7SKP106, NMBR, GJE1, VTA1, GPR126, HIVEP2, AIG1, ADAT2, PEX3, RNA5SP221, FUCA2, PHACTR2, LTV1, ZC2HC1B, PLAGL1, SF3B5, STX11, UTRN, EPM2A, FBXO30, SHPRH, GRM1, RNA5SP222, RAB32, ADGB, STXBP5, SAMD5, SASH1, UST, TAB2, RN7SL234P, SUMO4…
360	6	6q24.3-q25.3	6q24.3-q25.3	0.00961538	0	0.00961538	-0.018755	0.0379858	1	1	NA	NA	PPP1R14C
361	6	6q24.3-q25.3	6q26	0	0	0	0	0	NA	NA	NA	NA	snoU13.ENSG00000238594.1, IYD, PLEKHG1, MTHFD1L, AKAP12, RNY4P20, RN7SKP268, snoU13.ENSG00000238939.1, ZBTB2, RMND1, C6orf211, CCDC170, ESR1, SYNE1, RNA5SP223, MYCT1, VIP, FBXO5, MTRF1L, RGS17, RNA5SP224, RNA5SP225, OPRM1, IPCEF1, CNKSR3, SCAF8, TIAM2, MIR1273C, U8.ENSG00000238963.1, TFB1M, CLDN20, NOX3, MIR1202, SNORD28.ENSG00000212295.1, ARID1B, MIR4466, TMEM242, snoU13.ENSG00000252609.1, ZDHHC…
362	6	6q25.2-q27	6q25.2-q27	0.00961538	0.0116279	-0.00201252	-0.0334377	0.0294127	1	1	NA	NA	PARK2
363	6	6q26	6q26	0	0	0	0	0	NA	NA	NA	NA	PACRG
364	6	6q26	6q27	0	0	0	0	0	NA	NA	NA	NA	snoU13.ENSG00000239136.1, CAHM, QKI, RN7SL366P, C6orf118, PDE10A, RNA5SP226, SDIM1, LINC00473, SNORD45.ENSG00000231297.2, T, PRR18, SFT2D1, MPC1, RPS6KA2, MIR1913, RNASET2, FGFR1OP, MIR3939, CCR6, TCP10L2, C6orf123, GPR31, MLLT4, TCP10, TTLL2, UNC93A
365	6	6q27	6q27	0	0	0	0	0	NA	NA	NA	NA	DACT2, FRMD1, KIF25, SMOC2, THBS2
366	6	6q27	6q27	0.00961538	0	0.00961538	-0.018755	0.0379858	1	1	NA	NA	WDR27, C6orf120, PHF10, TCTE3, C6orf70, LINC00242, LINC00574
367	6	6q27	6q27	0.0192308	0	0.0192308	-0.0177854	0.0562469	0.562743	1	NA	NA	DLL1
368	6	6q27	6q27	0.0192308	0.0232558	-0.00402504	-0.049418	0.0413679	1	1	NA	NA	FAM120B
369	6	6q27	6q27	0.0192308	0.0232558	-0.00402504	-0.049418	0.0413679	1	1	NA	NA	MIR4644
370	6	6q27	6q27	0.0192308	0.0232558	-0.00402504	-0.049418	0.0413679	1	1	NA	NA	PSMB1, TBP, PDCD2
371	7	7p22.3	7p22.3	0.105769	0.0813953	0.0243739	-0.0689123	0.11766	0.747307	1	NA	NA	FAM20C, PDGFA, PRKAR1B, HEATR2, SUN1, GET4, ADAP1, C7orf50, COX19, CYP2W1, GPER, GPR146, MIR339, ZFAND2A
372	7	7p22.3	7p22.2	0.105769	0.0697674	0.0360018	-0.0545733	0.126577	0.541807	1	NA	NA	UNCX, MICALL2, INTS1, MAFK, TMEM184A, PSMG3, ELFN1, MAD1L1, MIR4655, FTSJ2, NUDT1, SNX8, CHST12, EIF3B, GRIFIN, LFNG, MIR4648, BRAT1, snoU13.ENSG00000238857.1, IQCE, TTYH3, AMZ1, GNA12, CARD11, RN7SKP130, SDK1, FOXK1, snoU13.ENSG00000238781.1
373	7	7p22.2	7p22.1	0.105769	0.0813953	0.0243739	-0.0689123	0.11766	0.747307	1	NA	NA	AP5Z1, MIR4656, RADIL, PAPOLB, MMD2, RBAK, RNF216P1
374	7	7p22.1	7p21	0.105769	0.0697674	0.0360018	-0.0545733	0.126577	0.541807	1	NA	NA	ZNF890P, WIPI2, SLC29A4, TNRC18, FBXL18, snoU13.ENSG00000238394.1, MIR589, ACTB, FSCN1, RNF216, CCZ1, OCM, PMS2, RN7SL556P, RSPH10B, ZNF815P, AIMP2, SNORA42.ENSG00000207217.1, EIF2AK1, ANKRD61, RN7SL851P, USP42, CYTH3, FAM220A, RAC1, DAGLB, KDELR2, FLJ20306, GRID2IP, ZDHHC4, C7orf26, ZNF853, ZNF12, PMS2CL, RSPH10B2, CCZ1B, MIR3683, C1GALT1, COL28A1, MIOS, RPA3, GLCCI1, ICA1, NXPH1, U3.ENSG0000021…
375	7	7p21.1	7p15.3	0.115385	0.0697674	0.0456172	-0.0466694	0.137904	0.41228	1	NA	NA	BZW2, TSPAN13, AGR2, AGR3, AHR, SNORA63.ENSG00000199473.1, SNX13, PRPS1L1, HDAC9, RN7SKP266, FERD3L, MIR3146, TMEM196, TWIST1, TWISTNB, MACC1, ITGB8, SNORD56.ENSG00000200753.1, ABCB5, SP8, RN7SL542P, SP4, MIR1183, DNAH11, CDCA7L, RAPGEF5, RNA5SP227, STEAP1B, IL6, TOMM7, SNORD93, FAM126A
376	7	7p15.3	7p14.3-p14.2	0.105769	0.0697674	0.0360018	-0.0545733	0.126577	0.541807	1	NA	NA	KLHL7, NUPL2, GPNMB, MALSU1, IGF2BP3, SNORD65.ENSG00000212264.1, TRA2A, CCDC126, FAM221A, STK31, snoU13.ENSG00000238849.1, RNA5SP228, snoU13.ENSG00000239098.1, NPY, MPP6, DFNA5, OSBPL3, CYCS, C7orf31, NPVF, U3.ENSG00000202233.1, MIR148A, NFE2L3, HNRNPA2B1, CBX3, SNX10, KIAA0087, C7orf71, SKAP2, HOXA1, HOTAIRM1, HOXA2, HOXA3, HOXA4, HOXA5, HOXA6, HOXA7, HOXA9, HOXA10, MIR196B, HOXA11, HOXA13, HOTT…
377	7	7p14.3-p14.2	7p14.2	0.105769	0.0697674	0.0360018	-0.0545733	0.126577	0.541807	1	NA	NA	DPY19L1, MIR548N, DPY19L2P1
378	7	7p14.3	7p14.3	0.105769	0.0697674	0.0360018	-0.0545733	0.126577	0.541807	1	NA	NA	TBX20
379	7	7p14.2	7p14.1	0.0961538	0.0697674	0.0263864	-0.062396	0.115169	0.696914	1	NA	NA	HERPUD2, SEPT7, PP13004, EEPD1, KIAA0895, ANLN, AOAH, ELMO1, MIR1200, snoU13.ENSG00000238772.1, SNORA51.ENSG00000200113.1
380	7	7p14.1	7p14.1	0.105769	0.0697674	0.0360018	-0.0545733	0.126577	0.541807	1	NA	NA	EPDR1
381	7	7p14.1	7p14.1	0.0961538	0.0697674	0.0263864	-0.062396	0.115169	0.696914	1	NA	NA	GPR141
382	7	7p14.1	7p14.1	0.105769	0.0697674	0.0360018	-0.0545733	0.126577	0.541807	1	NA	NA	NME8, SFRP4, STARD3NL, TRGC1, TRGC2, TRGJ1, TRGJ2, TRGJP1, TRGJP2, TRGJP, TRGV10, TRGV11, TRGV1, TRGV2, TRGV3, TRGV4, TRGV5, TRGV8, TRGV9, AMPH, RN7SL83P, FAM183B, VPS41, POU6F2, SNORA20.ENSG00000206947.1
383	7	7p14.1	7p14.1	0.105769	0.0813953	0.0243739	-0.0689123	0.11766	0.747307	1	NA	NA	YAE1D1, RALA, LINC00265, RN7SL496P, CDK13, C7orf10, MPLKIP
384	7	7p15-p13	7p12.3	0.105769	0.0697674	0.0360018	-0.0545733	0.126577	0.541807	1	NA	NA	INHBA, GLI3, C7orf25, HECW1, MIR3943, MRPL32, PSMA2, STK17A, COA1, BLVRA, MRPS24, URGCP, UBE2D4, POLR2J4, SPDYE1, RASA4CP, LINC00957, DBNL, PGAM2, POLM, AEBP1, MIR4649, POLD2, RNA5SP230, MYL7, GCK, YKT6, CAMK2B, NUDCD3, NPC1L1, DDX56, TMED4, OGDH, ZMIZ2, PPIA, H2AFV, PURB, MIR4657, MYO1G, SNHG15, CCM2, NACAD, TBRG4, SNORA5A, SNORA5B, SNORA5C, RAMP3, ADCY1, SEPT7P2, IGFBP1, IGFBP3, EPS15P1
385	7	7p12.3	7p12.3	0.105769	0.0697674	0.0360018	-0.0545733	0.126577	0.541807	1	NA	NA	TNS3
386	7	7p12.3	7p12.2	0.105769	0.0697674	0.0360018	-0.0545733	0.126577	0.541807	1	NA	NA	C7orf65, HUS1, LINC00525, PKD1L1, C7orf69, SUN3, C7orf57, UPP1, ABCA13, VWC2, ZPBP, C7orf72, IKZF1, FIGNL1, DDC
387	7	7p12.2	7p12.2	0.105769	0.0930233	0.012746	-0.0830944	0.108586	0.961251	1	NA	NA	GRB10
388	7	7p12.2	7p11.2	0.0961538	0.0697674	0.0263864	-0.062396	0.115169	0.696914	1	NA	NA	SNORA4.ENSG00000201133.1, COBL, RN7SL292P, SNORA31.ENSG00000253028.1, snoU13.ENSG00000238506.1, POM121L12, RN7SKP218, snoU13.ENSG00000238354.1, VSTM2A
389	7	7p11.2	7p12	0.0865385	0.0697674	0.016771	-0.0701318	0.103674	0.875669	1	NA	NA	SEC61G, SNORA73.ENSG00000252054.1
390	7	7p12	7p12	0.0865385	0.0813953	0.00514311	-0.0791183	0.0894045	1	1	NA	NA	EGFR
391	7	7q31.1-q31.33	7p11.2	0.0865385	0.0813953	0.00514311	-0.0791183	0.0894045	1	1	NA	NA	LANCL2, VOPP1, FKBP9L, SEPT14, MRPS17, ZNF713, RN7SL64P, GBAS, PSPH, CCT6A, SNORA15.ENSG00000207168.1, SNORA22.ENSG00000206603.1, SUMF2, PHKG1, CHCHD2, snoU13.ENSG00000238673.1, NUPR1L
392	7	7p11.2	7p11.2	0.0865385	0.0697674	0.016771	-0.0701318	0.103674	0.875669	1	NA	NA	RN7SL816P, ZNF479, MIR3147, ZNF716
393	7	7p11.2	7q11.21	0.0865385	0.0813953	0.00514311	-0.0791183	0.0894045	1	1	NA	NA	RN7SL855P, ZNF733P, ZNF727, ZNF679, ZNF736, ZNF680, ZNF107, ZNF138, ZNF273, ZNF117, CCT6P3, INTS4L1, INTS4L2, SNORA15.ENSG00000207062.1, SNORA22.ENSG00000207344.1, SNORA63.ENSG00000200130.1, SNORA63.ENSG00000252102.1, ZNF92, CCT6P1, SNORA15.ENSG00000206785.1, SNORA22.ENSG00000206634.1
394	7	7q11.21	7q11.21	0.0961538	0.0697674	0.0263864	-0.062396	0.115169	0.696914	1	NA	NA	VKORC1L1, GUSB, ASL, CRCP, TPST1, LINC00174, snoU13.ENSG00000252265.1, KCTD7, RABGEF1, snoU13.ENSG00000238841.1, GTF2IRD1P1, TMEM248, RN7SL43P, SBDS, TYW1
395	7	7q11.22	7q11.23	0.0961538	0.0697674	0.0263864	-0.062396	0.115169	0.696914	1	NA	NA	PMS2P4, STAG3L4, RNA5SP231, RN7SL371P, AUTS2, WBSCR17, RN7SKP75, CALN1, RNA5SP232, RN7SL377P, RN7SL625P, TYW1B, POM121, GTF2IRD2P1, NCF1B, NSUN5P2, NSUN5, STAG3L3, TRIM50, TRIM74, FKBP6, FZD9, BAZ1B, BCL7B, TBL2, MLXIPL, VPS37D, DNAJC30, WBSCR22, STX1A, MIR4284, ABHD11, LINC00035, RN7SL265P, CLDN3, CLDN4, WBSCR27, WBSCR28
396	7	7q11.23	7q21.3	0.105769	0.104651	0.00111807	-0.0876297	0.0898658	1	1	NA	NA	ELN, LIMK1, EIF4H, MIR590, LAT2, RFC2, CLIP2, GTF2IRD1, RNA5SP233, GTF2I, STAG3L2, GTF2IRD2, NCF1, GATSL1, WBSCR16, GTF2IRD2B, GATSL2, STAG3L1, TRIM73, NSUN5P1, POM121C, PMS2P3, HIP1, RN7SL642P, CCL26, CCL24, RHBDD2, POR, MIR4651, SNORA14A, TMEM120A, STYXL1, MDH2, snoU13.ENSG00000238935.1, SRRM3, RN7SL212P, HSPB1, YWHAG, SRCRB4D, ZP3, CCDC146, DTX2, POMZP3, UPK3B, FGL2, GSAP, snoU13.ENSG000002384…
397	7	7q21	7q21	0.115385	0.104651	0.0107335	-0.0890822	0.110549	0.998048	1	NA	NA	ADAM22
398	7	7q21.1	7q22.1	0.105769	0.104651	0.00111807	-0.0876297	0.0898658	1	1	NA	NA	SRI, STEAP4, SNORA67.ENSG00000207094.1, C7orf62, C7orf63, DPY19L2P4, STEAP1, STEAP2, ZNF804B, GTPBP10, CLDN12, CDK14, snoU13.ENSG00000238739.1, FZD1, MTERF, AKAP9, CYP51A1, LRRD1, KRIT1, ANKIB1, GATAD1, PEX1, RBM48, FAM133B, CDK6, RN7SL7P, SAMD9, SAMD9L, HEPACAM2, CCDC132, CALCR, MIR489, MIR653, GNGT1, MIR4652, TFPI2, GNG11, BET1, COL1A2, CASD1, SGCE, PEG10, RN7SKP129, PPP1R9A, snoU13.ENSG0000023…
399	7	7q22.1	7q22.1	0.105769	0.104651	0.00111807	-0.0876297	0.0898658	1	1	NA	NA	MYH16
400	7	7q22.1	7q22.1	0.105769	0.104651	0.00111807	-0.0876297	0.0898658	1	1	NA	NA	ARPC1A, ARPC1B, PDAP1, BUD31, snoU13.ENSG00000239133.1, PTCD1, CPSF4, ATP5J2, ZNF789, ZNF394, ZKSCAN5, FAM200A, ZNF655, ZSCAN25, CYP3A5, CYP3A7, CYP3A4, CYP3A43, OR2AE1, TRIM4, GJC3, SNORA40.ENSG00000222966.1, AZGP1, AZGP1P1, ZKSCAN1, ZSCAN21, ZNF3, COPS6, MCM7, MIR106B, MIR25, MIR93, AP4M1, TAF6, CNPY4, MBLAC1, LAMTOR4, C7orf43, GAL3ST4, MIR4658, GPC2, STAG3, GATS, PVRIG, SPDYE3, PILRB, STAG3L5P…
401	7	7q22.1	7q22.1	0.0961538	0.116279	-0.0201252	-0.119065	0.0788149	0.831743	1	NA	NA	ARMC10, NAPEPLD
402	7	7q22.1	7q22.3	0.0961538	0.104651	-0.00849732	-0.102992	0.0859972	1	1	NA	NA	DPY19L2P2, PMPCB, DNAJC2, PSMC2, SLC26A5, RELN, RN7SKP86, ORC5, LHFPL3, RN7SL8P, SNORD112.ENSG00000251911.1, KMT2E, SRPK2, PUS7, RINT1, EFCAB10
403	7	7q22.3	7q31	0.115385	0.104651	0.0107335	-0.0890822	0.110549	0.998048	1	NA	NA	ATXN7L1, CDHR3, SYPL1, NAMPT, CCDC71L, RNA5SP236, PIK3CG, PRKAR2B, HBP1, COG5, GPR22, DUS4L, BCAP29, snoU109.ENSG00000238832.1, SLC26A4, CBLL1, SLC26A3, DLD, LAMB1, U3.ENSG00000238297.1
404	7	7q31	7q31	0.125	0.104651	0.0203488	-0.0809666	0.121664	0.834779	1	NA	NA	LAMB4, NRCAM, PNPLA8, THAP5, DNAJB9, C7orf66, FLJ00325
405	7	7q31	7q31	0.144231	0.104651	0.0395796	-0.0645538	0.143713	0.549794	1	NA	NA	IMMP2L
406	7	7q31.1	7q31.1	0.134615	0.104651	0.0299642	-0.0727895	0.132718	0.684118	1	NA	NA	LRRN3, snoU13.ENSG00000238922.1, DOCK4, RNA5SP237, ZNF277, RN7SKP187, IFRD1, LSMEM1
407	7	7q31.32	7q31	0.125	0.104651	0.0203488	-0.0809666	0.121664	0.834779	1	NA	NA	TMEM168, C7orf60, GPR85, TSRM, PPP1R3A, FOXP2, RNA5SP238, MIR3666, MDFIC, SNORA25.ENSG00000202377.1, TFEC, TES, CAV2, snoZ185, CAV1, MET, CAPZA2, RNA5SP239, ST7, WNT2, ASZ1, CFTR, CTTNBP2, NAA38, ANKRD7, U1.ENSG00000271739.1
408	7	7q31	7q31.33	0.134615	0.104651	0.0299642	-0.0727895	0.132718	0.684118	1	NA	NA	KCND2, TSPAN12, ING3, RNA5SP240, CPED1, RNA5SP241, WNT16, FAM3C, RN7SKP277, PTPRZ1, AASS, FEZF1, CADPS2, RNF133, RNF148, TAS2R16, SLC13A1, IQUB, NDUFA5, ASB15, LMOD2, WASL, HYAL4, SPAM1, TMEM229A, GPR37, POT1, GRM8, MIR592, ZNF800
409	7	7q32.1	7q31	0.144231	0.104651	0.0395796	-0.0645538	0.143713	0.549794	1	NA	NA	GCC1, ARF5, FSCN3, PAX4, SND1, LRRC4, MIR593, LEP, RBM28, PRRT4, IMPDH1, FAM71F1, FAM71F2, HILPDA, METTL2B, RNA5SP242, RNA5SP243, CALU, RN7SL81P, OPN1SW, CCDC136, FLNC, KCP, ATP6V1F, IRF5, TNPO3, RN7SL306P, snoU13.ENSG00000238733.1, TSPAN33, SMO, AHCYL2, STRIP2, SMKR1, NRF1, RNA5SP244, MIR182, MIR183, MIR96, UBE2H, ZC3HC1, RNA5SP245, KLHDC10, TMEM209, SSMEM1, CPA2, CPA4, snoU13.ENSG00000238336.1,…
410	7	7q31	7q31	0.144231	0.104651	0.0395796	-0.0645538	0.143713	0.549794	1	NA	NA	EXOC4
411	7	7q33	7q33	0.153846	0.104651	0.049195	-0.0562621	0.154652	0.433673	1	NA	NA	LRGUK, SLC35B4, AKR1B1, AKR1B10, AKR1B15, BPGM, CALD1, AGBL3, C7orf49, TMEM140, WDR91, STRA8, CNOT4, NUP205, C7orf73, SLC13A4, FAM180A, LUZP6, MTPN, snoU13.ENSG00000238488.1, CHRM2, MIR490, PTN, SNORD81.ENSG00000202023.1, DGKI, CREB3L2, AKR1D1, RN7SKP223, snoU13.ENSG00000239145.1, MIR4468, SNORA51.ENSG00000201465.1, snoU13.ENSG00000238984.1, TRIM24, snoU13.ENSG00000239123.1, SVOPL, SNORA40.ENSG00…
412	7	7q33	7q35	0.173077	0.104651	0.0684258	-0.0395194	0.176371	0.256014	1	NA	NA	RN7SL207P, CNTNAP2
413	7	7q35	7q36.3	0.153846	0.104651	0.049195	-0.0562621	0.154652	0.433673	1	NA	NA	MIR548F4, RNA5SP249, RN7SL456P, U3.ENSG00000199370.1, RN7SL72P, C7orf33, CUL1, EZH2, RN7SL569P, RNY5, RNY1, RNY3, RNY4, PDIA4, ZNF425, ZNF786, RN7SL521P, ZNF398, ZNF282, ZNF212, ZNF783, SNORD112.ENSG00000252557.1, ZNF777, ZNF746, ZNF767, KRBA1, ZNF467, SSPO, ATP6V0E2, ZNF862, ACTR3C, LRRC61, ZBED6CL, RARRES2, REPIN1, ZNF775, GIMAP8, GIMAP7, GIMAP4, GIMAP6, GIMAP2, GIMAP1, GIMAP5, TMEM176B, TMEM17…
414	8	8p23.3	8p23.3	0.00961538	0.0116279	-0.00201252	-0.0334377	0.0294127	1	1	NA	NA	ERICH1, FBXO25, OR4F21, RPL23AP53, TDRP, ZNF596
415	8	8p23	8p23	0.00961538	0.0116279	-0.00201252	-0.0334377	0.0294127	1	1	NA	NA	DLGAP2
416	8	8p23	8p23.3	0	0.0116279	-0.0116279	-0.0449069	0.0216511	0.923984	1	NA	NA	CLN8, MIR596, ARHGEF10, KBTBD11, MYOM2
417	8	8p23.2	8p23.2	0	0.0232558	-0.0232558	-0.0657308	0.0192192	0.395677	1	NA	NA	CSMD1
418	8	8p23.2	8p23-p22	0	0.0116279	-0.0116279	-0.0449069	0.0216511	0.923984	1	NA	NA	RNA5SP251, RN7SL872P, SNORA70.ENSG00000206661.1, RN7SL318P, RN7SKP159, MCPH1, ANGPT2, AGPAT5, MIR4659A, XKR5, DEFB1, DEFA6, DEFA4, ALG1L13P, DEFA1B, DEFA1, DEFA3, DEFA5, DEFB103A, DEFB103B, DEFB104A, DEFB104B, DEFB105A, DEFB105B, DEFB106A, DEFB106B, DEFB107A, DEFB107B, DEFB4A, DEFB4B, FAM66B, FAM66E, FAM85B, FAM86B3P, FAM90A24P, LRLE1, MIR548I3, SGK223, SPAG11A, SPAG11B, ZNF705B, ZNF705G, RN7SL17…
419	8	8p23-p22	8p23-p22	0	0.0232558	-0.0232558	-0.0657308	0.0192192	0.395677	1	NA	NA	MTMR9
420	8	8p23.1	8p22	0	0.0116279	-0.0116279	-0.0449069	0.0216511	0.923984	1	NA	NA	SLC35G5, TDH, C8orf12, RN7SL293P, FAM167A, BLK, LINC00208, GATA4, C8orf49, NEIL2, CTSB, DEFB130.ENSG00000232948.1, DEFB130.ENSG00000233050.1, DEFB134, DEFB135, DEFB136, FAM66A, FAM66D, FAM86B1, FAM86B2, FDFT1, RNA5SP253, RNA5SP254, USP17L2, ZNF705D, MIR5692A2, LONRF1, LINC00681, KIAA1456, DLC1, RNA5SP255, C8orf48, SGCZ, MIR383, TUSC3, MSR1, RN7SL474P, FGF20, MICU3, ZDHHC2, CNOT7, VPS37A, MTMR7, S…
421	8	8p22	8p22	0	0.0116279	-0.0116279	-0.0449069	0.0216511	0.923984	1	NA	NA	NAT2
422	8	8p21.3	8p21.3	0.00961538	0.0116279	-0.00201252	-0.0334377	0.0294127	1	1	NA	NA	PSD3
423	8	8p21.3	8p21.1	0	0.0116279	-0.0116279	-0.0449069	0.0216511	0.923984	1	NA	NA	SNORA62.ENSG00000201157.1, SH2D4A, CSGALNACT1, INTS10, LPL, SLC18A1, ATP6V1B2, LZTS1, U3.ENSG00000251944.1, GFRA2, DOK2, XPO7, NPM2, snoU13.ENSG00000238466.1, FGF17, DMTN, FAM160B2, NUDT18, HR, REEP4, LGI3, SFTPC, BMP1, PHYHIP, MIR320A, POLR3D, PIWIL2, PPP3CC, SLC39A14, SORBS3, PDLIM2, C8orf58, KIAA1967, BIN3, EGR3, PEBP4, RN7SL303P, RHOBTB2, TNFRSF10B, TNFRSF10C, TNFRSF10D, TNFRSF10A, CHMP7, R3H…
424	8	8p21	8p21	0.00961538	0.0116279	-0.00201252	-0.0334377	0.0294127	1	1	NA	NA	CHRNA2
425	8	8p21	8p21	0	0.0116279	-0.0116279	-0.0449069	0.0216511	0.923984	1	NA	NA	EPHX2, CLU, SCARA3, MIR3622B, CCDC25, snoU13.ENSG00000238624.1, ESCO2, PBK, SCARA5, MIR4287, NUGGC, ELP3, PNOC, ZNF395, FBXO16, FZD3, MIR4288, RNA5SP259
426	8	8p21	8p21	0	0.0116279	-0.0116279	-0.0449069	0.0216511	0.923984	1	NA	NA	EXTL3
427	8	8p21.1	8p12	0	0.0116279	-0.0116279	-0.0449069	0.0216511	0.923984	1	NA	NA	INTS9, HMBOX1, RNA5SP260, KIF13B, RN7SL781P, DUSP4, LINC00589, FAM183CP, MIR3148, TMEM66, LEPROTL1, MBOAT4, DCTN6, TUBBP1, RBPMS, GTF2E2, SMIM18, GSR, UBXN8, PPP2CB, TEX15, PURG, WRN, RNA5SP261, NRG1, RNA5SP262, RNA5SP263, FUT10, TTI2, MAK16, SNORD13, SNORA70.ENSG00000252505.1, RNF122, RN7SL621P, DUSP26, RN7SL457P, UNC5D
428	8	8p12	8p12	0	0	0	0	0	NA	NA	NA	NA	RN7SKP201
429	8	8p12	8p11.21	0	0	0	0	0	NA	NA	NA	NA	RNA5SP264, KCNU1, ZNF703, ERLIN2, GPR124, PROSC, BRF2, RAB11FIP1, RN7SL709P, GOT1L1, ADRB3, EIF4EBP1, ASH2L, STAR, LSM1, BAG4, DDHD2, PPAPDC1B, WHSC1L1, LETM2, FGFR1, RPS20P22, C8orf86, TACC1, PLEKHA2, HTRA4, TM2D2, ADAM9, SNORD38.ENSG00000207199.1, ADAM32, ADAM5, ADAM3A, ADAM18, ADAM2, IDO1, IDO2
430	8	8p11.2	8p11.21	0	0	0	0	0	NA	NA	NA	NA	C8orf4, ZMAT4
431	8	8p11.21	8p11	0	0	0	0	0	NA	NA	NA	NA	SFRP1, MIR548AO, SNORD65.ENSG00000238936.1, GOLGA7, GINS4, AGPAT6, ANK1, MIR486, RN7SL149P, KAT6A, SNORD112.ENSG00000238966.1, AP3M2, PLAT, snoU13.ENSG00000238714.1, IKBKB, POLB, DKK4, VDAC3, SLC20A2, SMIM19, CHRNB3, CHRNA6, THAP1, RNF170, RN7SL806P, HOOK3, MIR4469
432	8	8p11	8q11.1	0	0	0	0	0	NA	NA	NA	NA	FNTA, HGSNAT, POTEA, RN7SKP41, SGK196, U3.ENSG00000201329.1
433	8	8q11.1	8q12.1	0	0	0	0	0	NA	NA	NA	NA	LINC00293, RN7SKP32, SPIDR, CEBPD, PRKDC, MCM4, UBE2V2, EFCAB1, SNAI2, C8orf22, RN7SKP294, SNTG1, SNORA7.ENSG00000201316.1, PXDNL, PCMTD1, ST18, FAM150A, RB1CC1, NPBWR1, OPRK1, ATP6V1H, RGS20, TCEA1, LYPLA1, MRPL15, RNU6ATAC32P, RNU105C, RN7SL250P, SOX17, RP1, XKR4, TMEM68, RNA5SP265, TGS1, LYN, SNORA1.ENSG00000199405.1, RN7SL798P, RN7SL323P, RPS20, SNORD54, MOS, SNORA3.ENSG00000221093.1, PLAG1, …
434	8	8q12.2	8q12.2	0	0	0	0	0	NA	NA	NA	NA	CHD7
435	8	8q12.3	8q13.3	0	0	0	0	0	NA	NA	NA	NA	CLVS1, ASPH, RN7SKP97, MIR4470, NKAIN3, GGH, TTPA, YTHDF3, RN7SL135P, RN7SKP135, LINC00966, BHLHE22, CYP7B1, ARMC1, MTFR1, PDE7A, DNAJC5B, TRIM55, CRH, LINC00967, ADHFE1, RRS1, C8orf46, MYBL1, VCPIP1, C8orf44, SGK3, MCMDC2, SNHG6, SNORD87, TCF24, PPP1R42, COPS5, CSPP1, RNA5SP268, ARFGEF1, CPA6, PREX2, C8orf34, RNA5SP269, SULF1, SLCO5A1, RN7SKP29, RN7SL675P, RNA5SP270, PRDM14, NCOA2, TRAM1, snoU13…
436	8	8q13.3	8q13.3	0	0.0116279	-0.0116279	-0.0449069	0.0216511	0.923984	1	NA	NA	EYA1
437	8	8q13.3	8q21.11	0	0	0	0	0	NA	NA	NA	NA	U8.ENSG00000200191.1, MSC, TRPA1, RNA5SP271, KCNB2, TERF1, SBSPON, RPL7, RDH10, STAU2, UBE2W, TCEB1, TMEM70, LY96, JPH1, GDAP1, MIR5681A, PI15, CRISPLD1, CASC9, HNF4G, snoU13.ENSG00000238595.1
438	8	8q21.11	8q21.13	0	0	0	0	0	NA	NA	NA	NA	ZFHX4, PEX2, PKIA, ZC2HC1A, IL7, STMN2, HEY1, MRPS28, TPD52, RN7SL41P, MIR5708, SNORA20.ENSG00000206649.1, ZBTB10, RN7SL107P, ZNF704, RN7SL308P
439	8	8q21.13	8q21.13	0.00961538	0	0.00961538	-0.018755	0.0379858	1	1	NA	NA	PAG1
440	8	8q21.13	8q22.1	0	0	0	0	0	NA	NA	NA	NA	FABP5, PMP2, FABP9, FABP4, FABP12, IMPA1P, IMPA1, SLC10A5, ZFAND1, CHMP4C, SNX16, RALYL, snoU13.ENSG00000238566.1, LRRCC1, E2F5, C8orf59, CA13, CA1, CA3, CA2, REXO1L10P.ENSG00000255940.1, REXO1L10P.ENSG00000270416.1, REXO1L11P, REXO1L1, ATP6V0D2, PSKH2, SLC7A13, WWP1, RMDN1, CPNE3, CNGB3, CNBD1, DCAF4L2, MMP16, RNA5SP272, RIPK2, OSGIN2, NBN, DECR1, CALB1, LINC00534, RNA5SP273, TMEM64, NECAB1, TME…
441	8	8q22.1	8q22.1	0	0	0	0	0	NA	NA	NA	NA	C8orf87, LINC00535, RNA5SP274
442	8	8q22.1	8q22.3	0	0	0	0	0	NA	NA	NA	NA	FAM92A1, RBM12B, TMEM67, PDP1, MIR378D2, CDH17, GEM, FSBP, RAD54B, KIAA1429, ESRP1, DPY19L4, INTS8, CCNE2, NDUFAF6, snoU13.ENSG00000238791.1, TP53INP1, MIR3150B, PLEKHF2, C8orf37, GDF6, MTERFD1, PTDSS1, UQCRB, SDC2, CPQ, TSPYL5, U3.ENSG00000207215.1, MTDH, LAPTM4B, MATN2, RPL30, SNORA72.ENSG00000207067.1, C8orf47, HRSP12, POP1, NIPAL2, STK3, KCNS2, RN7SKP85, OSR2, VPS13B, MIR599, MIR875, RN7SL350…
443	8	8q22.3	8q22.3	0	0.0116279	-0.0116279	-0.0449069	0.0216511	0.923984	1	NA	NA	RIMS2
444	8	8q22.3	8q23.1	0	0.0116279	-0.0116279	-0.0449069	0.0216511	0.923984	1	NA	NA	snoU13.ENSG00000238687.1, DPYS, DCSTAMP, MIR548A3, LRP12, ZFPM2, OXR1, ABRA
445	8	8q23.1	8q23.2	0.00961538	0	0.00961538	-0.018755	0.0379858	1	1	NA	NA	ANGPT1, RNA5SP275, RSPO2, EIF3E, EMC2, TMEM74, TRHR, NUDCD1, ENY2, PKHD1L1, EBAG9, SYBU, SNORD112.ENSG00000252559.1, KCNV1
446	8	8q23.3	8q24.11	0.00961538	0	0.00961538	-0.018755	0.0379858	1	1	NA	NA	CSMD3, snoU13.ENSG00000238656.1, MIR2053, TRPS1, LINC00536, RNA5SP276, EIF3H, UTP23, RAD21, MIR3610, AARD, SLC30A8, RN7SL228P, RN7SL826P, SNORA31.ENSG00000252852.1, MED30
447	8	8q24.11	8q24.11	0.0192308	0	0.0192308	-0.0177854	0.0562469	0.562743	1	NA	NA	EXT1
448	8	8q24.12	8q24.12	0.00961538	0	0.00961538	-0.018755	0.0379858	1	1	NA	NA	SAMD12, TNFRSF11B, COLEC10, MAL2, SNORA32.ENSG00000206776.1, NOV, ENPP2, RN7SKP153, TAF2, DSCC1, RN7SL396P
449	8	8q24.12	8q24.12	0.00961538	0.0116279	-0.00201252	-0.0334377	0.0294127	1	1	NA	NA	DEPTOR
450	8	8q24.12	8q24.12	0.00961538	0	0.00961538	-0.018755	0.0379858	1	1	NA	NA	RNA5SP277, COL14A1, MRPL13, MTBP, SNTB1, HAS2
451	8	8q24.12	8q24	0	0	0	0	0	NA	NA	NA	NA	snoU13.ENSG00000238901.1, ZHX2, DERL1, RNY4P5, TBC1D31, FAM83A, U3.ENSG00000221461.1, MIR4663, C8orf76, ZHX1, snoU13.ENSG00000238422.1, ATAD2, MIR548AA1, WDYHV1, FBXO32, RN7SKP155, KLHL38, ANXA13, FAM91A1, FER1L6, TMEM65, TRMT12, RNF139, TATDN1, NDUFB9, MTSS1, MIR4662B, LINC00964, ZNF572, SQLE, KIAA0196, NSMCE2, RN7SL329P, TRIB1, RN7SL590P, LINC00861, FAM84B, PCAT1, PCAT2, CCAT1, CASC8, POU5F1B, …
452	9	9p24.3	9p22.3	0.0192308	0	0.0192308	-0.0177854	0.0562469	0.562743	1	NA	NA	C9orf66, CBWD1, DOCK8, FAM138C, FOXD4, KANK1, RN7SL412P, DMRT1, DMRT2, DMRT3, RNA5SP279
453	9	9p22.3	9p24.1	0.00961538	0	0.00961538	-0.018755	0.0379858	1	1	NA	NA	SMARCA2, RN7SL592P, VLDLR, KCNV2, KIAA0020, CARM1P1, RFX3, GLIS3, SLC1A1, SPATA6L, PPAPDC2, CDC37L1, AK3
454	9	9p24.1-p23	9p24.1-p23	0.0192308	0	0.0192308	-0.0177854	0.0562469	0.562743	1	NA	NA	RCL1
455	9	9p24	9p24.1	0.00961538	0	0.00961538	-0.018755	0.0379858	1	1	NA	NA	JAK2, INSL4, INSL6, RLN2, RLN1
456	9	9p24.1	9p24.1	0.00961538	0.0116279	-0.00201252	-0.0334377	0.0294127	1	1	NA	NA	PLGRKT
457	9	9p24	9p24.1	0.00961538	0	0.00961538	-0.018755	0.0379858	1	1	NA	NA	CD274, PDCD1LG2, KIAA1432, ERMP1, KIAA2026, MLANA, snoU13.ENSG00000238654.1, MIR4665, RANBP6, IL33, C9orf38, GLDC, KDM4C, RN7SL123P, RN7SL25P, TPD52L3, UHRF2, snoU13.ENSG00000252110.1, C9orf123
458	9	9p23-p24.3	9p23-p24.3	0.0384615	0	0.0384615	-0.00911978	0.0860429	0.183345	1	NA	NA	PTPRD
459	9	9p23-p24.3	9p23-p22	0.00961538	0	0.00961538	-0.018755	0.0379858	1	1	NA	NA	SNORD27.ENSG00000251699.1, RN7SL5P, TYRP1, RN7SL849P, LURAP1L, MPDZ, LINC00583, NFIB, ZDHHC21, CER1
460	9	9p22.3	9p22.3	0.00961538	0.0116279	-0.00201252	-0.0334377	0.0294127	1	1	NA	NA	FREM1
461	9	9p22.3	9p22.3	0.00961538	0	0.00961538	-0.018755	0.0379858	1	1	NA	NA	TTC39B, RN7SL157P, SNAPC3, PSIP1, RN7SL98P
462	9	9p22.3	9p22.3	0.00961538	0.0116279	-0.00201252	-0.0334377	0.0294127	1	1	NA	NA	CCDC171
463	9	9p22.3	9p21	0.00961538	0	0.00961538	-0.018755	0.0379858	1	1	NA	NA	C9orf92, BNC2, RN7SL720P, CNTLN, SH3GL2, ADAMTSL1, MIR3152, RN7SKP258, FAM154A, RRAGA, HAUS6, SCARNA8, RN7SL158P, PLIN2, DENND4C, snoU13.ENSG00000238348.1, RPS6
464	9	9p22.1	9p22.1	0.00961538	0	0.00961538	-0.018755	0.0379858	1	1	NA	NA	ACER2
465	9	9p22.1	9p21.3	0.00961538	0	0.00961538	-0.018755	0.0379858	1	1	NA	NA	SLC24A2, MLLT3, MIR4473, MIR4474, FOCAD, MIR491, SNORA30.ENSG00000202189.1, PTPLAD2, IFNB1, IFNW1, IFNA21, IFNA4, IFNA10, IFNA16, IFNA7, IFNA17, IFNA14, IFNA5, KLHL9, IFNA6, IFNA13, IFNA2, IFNA8, IFNA1, MIR31HG, IFNE, MIR31, SNORD39.ENSG00000264379.1, RN7SL151P
466	9	9p21	9p21	0.0288462	0	0.0288462	-0.0139431	0.0716355	0.315843	1	NA	NA	MTAP, C9orf53, CDKN2A, CDKN2B
467	9	9p21.3	9p21.2	0.00961538	0	0.00961538	-0.018755	0.0379858	1	1	NA	NA	DMRTA1, ELAVL2, IZUMO3, RMRPP5, RN7SKP120, TUSC1, SNORA31.ENSG00000252580.1, CAAP1, RN7SL100P, PLAA, IFT74, LRRC19, TEK, RNA5SP280, LINC00032, EQTN, MOB3B, IFNK, C9orf72
468	9	9p21.2	9p21.1	0.0192308	0	0.0192308	-0.0177854	0.0562469	0.562743	1	NA	NA	LINGO2, MIR873, MIR876
469	9	9p21.1	9p21.1	0.0192308	0	0.0192308	-0.0177854	0.0562469	0.562743	1	NA	NA	snoU13.ENSG00000239155.1
470	9	9p21.1	9p13.3	0.00961538	0	0.00961538	-0.018755	0.0379858	1	1	NA	NA	RNA5SP281, ACO1, DDX58, TOPORS, NDUFB6, GVQW1, TAF1L, TMEM215, APTX, DNAJA1, SMU1, B4GALT1, RNU4ATAC15P, SPINK4, BAG1, CHMP5, NFX1, AQP7, AQP3, NOL6, ANKRD18B, PTENP1, PRSS3, UBE2R2, RNU4ATAC11P, UBAP2, SNORD121B, SNORD121A, RN7SKP114, DCAF12, UBAP1, RNA5SP282, KIF24, NUDT2, KIAA1161, C9orf24, FAM219A, DNAI1, RN7SKP24, ENHO, CNTFR, RPP25L, DCTN3, ARID3C, GALT, SIGMAR1, IL11RA, CCL27, CCL19, CCL21…
471	9	9p13.3	9p13.3	0.00961538	0.0116279	-0.00201252	-0.0334377	0.0294127	1	1	NA	NA	GLIPR2
472	9	9p13.3	9p13.1	0.00961538	0	0.00961538	-0.018755	0.0379858	1	1	NA	NA	CCIN, CLTA, GNE, RNF38, MELK, MIR4475, PAX5, MIR4540, MIR4476, ZCCHC7, GRHPR, ZBTB5, RN7SL463P, POLR1E, FBXO10, TOMM5, FRMPD1, RN7SKP171, TRMT10B, EXOSC3, DCAF10, SLC25A51, SHB, U8.ENSG00000200026.1, snoU13.ENSG00000238313.1, ALDH1B1, IGFBPL1, ANKRD18A, SNX18P3, FAM201A
473	9	9q13	9q12	0.0288462	0	0.0288462	-0.0139431	0.0716355	0.315843	1	NA	NA	ANKRD20A1, ANKRD20A2, ANKRD20A3, ANKRD20A4, CBWD3, CBWD5, CBWD6, CBWD7, CNTNAP3B, CNTNAP3, FAM27A, FAM27B, FAM27C, FAM27D1, FAM27E1, FAM27E2, FAM27E3, FAM74A1, FAM74A2, FAM74A3, FAM74A4, FAM74A5, FAM74A6, FAM95B1, FOXD4L2, FOXD4L3, FOXD4L4, FOXD4L5, FOXD4L6, MIR1299, MIR4477A, PGM5P2
474	9	9q13	9q13	0.0384615	0	0.0384615	-0.00911978	0.0860429	0.183345	1	NA	NA	PGM5
475	9	9p11.2	9p13.1	0.0288462	0	0.0288462	-0.0139431	0.0716355	0.315843	1	NA	NA	RN7SL343P, RN7SL422P, RN7SL462P, RN7SL544P, RN7SL565P, RN7SL640P, RN7SL722P, RN7SL763P, RN7SL787P, RNA5SP283, RNA5SP284, SNORA70.ENSG00000252133.1, SNORA70.ENSG00000252617.1, SNORA70.ENSG00000252724.1, SNORA70.ENSG00000252878.1, SPATA31A1, SPATA31A2, SPATA31A3, SPATA31A4, SPATA31A5, SPATA31A6, SPATA31A7, ZNF658
476	9	9q21.11	9q21.11	0.0384615	0	0.0384615	-0.00911978	0.0860429	0.183345	1	NA	NA	TMEM252
477	9	9q13	9q13	0.0384615	0	0.0384615	-0.00911978	0.0860429	0.183345	1	NA	NA	PIP5K1B
478	9	9q21.11	9q21.11	0.0384615	0	0.0384615	-0.00911978	0.0860429	0.183345	1	NA	NA	FAM122A
479	9	9q13	9q21.11	0.0384615	0	0.0384615	-0.00911978	0.0860429	0.183345	1	NA	NA	PRKACG, FXN
480	9	9q13-q21	9q13-q21	0.0384615	0.0116279	0.0268336	-0.0271398	0.080807	0.487132	1	NA	NA	TJP2
481	9	9q21.11	9q13	0.0384615	0	0.0384615	-0.00911978	0.0860429	0.183345	1	NA	NA	FAM189A2, APBA1, PTAR1, C9orf135, RN7SL570P, MAMDC2, SMC5, KLF9, TRPM3, MIR204, TMEM2, ABHD17B, C9orf85, C9orf57, GDA, RNA5SP285, ZFAND5, TMC1, snoU13.ENSG00000238402.1, ALDH1A1, ANXA1, RNA5SP286, RORB, TRPM6, RN7SKP47, RNY4P1, C9orf40, C9orf41, NMRK1, OSTF1, snoU13.ENSG00000238598.1, PCSK5, RFK, GCNT1
482	9	9q21.2	9q21.2	0.0384615	0	0.0384615	-0.00911978	0.0860429	0.183345	1	NA	NA	PRUNE2
483	9	9q21.2	9q21.2	0.0384615	0	0.0384615	-0.00911978	0.0860429	0.183345	1	NA	NA	PCA3, FOXB2, VPS13A, GNA14, GNAQ, RN7SKP59, CEP78, PSAT1
484	9	9q21.31	9q21.33	0.0384615	0.0116279	0.0268336	-0.0271398	0.080807	0.487132	1	NA	NA	TLE4, TLE1, RNA5SP287, SNORD95.ENSG00000200969.1, SPATA31D5P, SPATA31D4, SPATA31D3, SPATA31D1, RASEF, RN7SKP242, FRMD3, snoU13.ENSG00000238608.1, SNORD112.ENSG00000252256.1, IDNK, UBQLN1, GKAP1, KIF27, C9orf64, HNRNPK, RMI1, SLC28A3, NTRK2, AGTPBP1
485	9	9q21.33	9q31.1	0.0384615	0	0.0384615	-0.00911978	0.0860429	0.183345	1	NA	NA	NAA35, GOLM1, C9orf153, RN7SKP264, ISCA1, ZCCHC6, GAS1, C9orf170, SNORA26.ENSG00000212421.1, DAPK1, CTSL, CTSL3P, SPATA31E1, SPATA31C1, CDK20, U6.ENSG00000271923.1, U3.ENSG00000252299.1, SPIN1, NXNL2, MIR4289, C9orf47, S1PR3, SHC3, CKS2, MIR3153, SECISBP2, SEMA4D, GADD45G, MIR4290, DIRAS2, SYK, LINC00484, AUH, NFIL3, ROR2, SPTLC1, LINC00475, snoU13.ENSG00000238996.1, IARS, SNORA84, NOL8, ASPN, CE…
486	9	9q31.1	9q31.1	0.0288462	0	0.0288462	-0.0139431	0.0716355	0.315843	1	NA	NA	LINC00587, CYLC2
487	9	9q31.1	9q32	0.0192308	0	0.0192308	-0.0177854	0.0562469	0.562743	1	NA	NA	RNA5SP291, SMC2, OR13F1, OR13C4, OR13C3, OR13C8, OR13C2, OR13C5, OR13C9, OR13D1, NIPSNAP3A, NIPSNAP3B, ABCA1, RN7SKP191, SLC44A1, FSD1L, FKTN, TAL2, TMEM38B, RN7SKP77, RNA5SP292, ZNF462, RAD23B, KLF4, RN7SL659P, RNA5SP293, ACTL7B, ACTL7A, IKBKAP, FAM206A, CTNNAL1, TMEM245, MIR32, FRRS1L, EPB41L4B, PTPN3, MIR3927, PALM2, AKAP2, C9orf152, TXNDC8, TXN, SVEP1
488	9	9q31.3-q32	9q31.3-q32	0.0288462	0	0.0288462	-0.0139431	0.0716355	0.315843	1	NA	NA	MUSK
489	9	9q31.3	9q31.3	0.0192308	0	0.0192308	-0.0177854	0.0562469	0.562743	1	NA	NA	LPAR1, RNY4P18, OR2K2, KIAA0368, RNA5SP294
490	9	9q31.3	9q31.3-q33.1	0.00961538	0	0.00961538	-0.018755	0.0379858	1	1	NA	NA	ZNF483, PTGR1, LRRC37A5P, DNAJC25, GNG10, C9orf84, UGCG, MIR4668, SUSD1
491	9	9q32	9q33.3	0.0192308	0	0.0192308	-0.0177854	0.0562469	0.562743	1	NA	NA	PTBP3, RN7SL57P, RNA5SP295, RN7SL430P, HSDL2, C9orf147, KIAA1958, INIP, SNX30, SLC46A2, FAM225A, FAM225B, ZFP37, ZNF883, SLC31A2, FKBP15, SLC31A1, CDC26, PRPF4, RNF183, WDR31, BSPRY, HDHD3, ALAD, C9orf43, POLE3, RGS3, ZNF618, AMBP, KIF12, COL27A1, MIR455, ORM1, ORM2, AKNA, DFNB31, snoU13.ENSG00000238530.1, ATP6V1G1, C9orf91, TNFSF15, TNFSF8, TNC, DEC1, LINC00474, PAPPA, ASTN2, TRIM32, SNORA70C, R…
492	9	9q33.3-q34.11	9q34.11	0.00961538	0	0.00961538	-0.018755	0.0379858	1	1	NA	NA	NEK6, PSMB7, GPR144, NR5A1, NR6A1, RN7SL302P, MIR181A2HG, MIR181A2, MIR181B2, OLFML2A, WDR38, RPL35, ARPC5L, GOLGA1, SCAI, PPP6C, RABEPK, HSPA5, GAPVD1, MAPKAP1, RN7SL30P, PBX3, MVB12B, NRON, SNORD116.ENSG00000252985.1, LMX1B, ZBTB43, ZBTB34, RALGPS1, ANGPTL2, GARNL3, SLC2A8, ZNF79, RPL12, SNORA65, LRSAM1, FAM129B, STXBP1, MIR3911, PTRH1, C9orf117, TTC16, TOR2A, SH2D3C, CDK9, MIR3960, FPGS, ENG, …
493	9	9q34.11	9q34.11	0.00961538	0.0116279	-0.00201252	-0.0334377	0.0294127	1	1	NA	NA	USP20
494	9	9q34	9q34	0.0192308	0	0.0192308	-0.0177854	0.0562469	0.562743	1	NA	NA	FNBP1, GPR107, NCS1, HMCN2, RN7SL665P, ASS1, snoU13.ENSG00000238298.1, FUBP3, PRDM12, EXOSC2
495	9	9q34.1	9q34.13-q34.3	0.0192308	0	0.0192308	-0.0177854	0.0562469	0.562743	1	NA	NA	ABL1, QRFP, FIBCD1, LAMC3, SNORA31.ENSG00000252582.1, AIF1L
496	9	9q34.1	9q34.1	0.0192308	0.0116279	0.00760286	-0.0347854	0.0499912	1	1	NA	NA	NUP214
497	9	9q34	9q34.2	0.0192308	0	0.0192308	-0.0177854	0.0562469	0.562743	1	NA	NA	FAM78A, PPAPDC3, PRRC2B, SNORD62A, SNORD62B, POMT1, UCK1, RAPGEF1, RN7SL328P, SNORA67.ENSG00000212395.1, MED27, NTNG2, SETX, TTF1, C9orf171, BARHL1, DDX31, GTF3C4, AK8, C9orf9, TSC1, GFI1B, MIR548AW, GTF3C5, CELP, CEL, RALGDS, snoU13.ENSG00000238657.1, GBGT1, OBP2B, ABO, SURF6, MED22, RPL7A, SNORD24, SNORD36A, SNORD36B, SNORD36C, SURF1, SURF2, SURF4, C9orf96
498	9	9q34.2	9q34.3	0.00961538	0	0.00961538	-0.018755	0.0379858	1	1	NA	NA	REXO4, ADAMTS13, CACFD1, SLC2A6, TMEM8C, ADAMTSL2, FAM163B, DBH, SARDH, VAV2, LINC00094, BRD3, WDR5, RNU6ATAC, RXRA, MIR4669, COL5A1, MIR3689A, MIR3689B, MIR3689C, MIR3689D1, MIR3689D2, MIR3689E, MIR3689F
499	9	9q34.3	9q34.3	0.00961538	0.0116279	-0.00201252	-0.0334377	0.0294127	1	1	NA	NA	FCN2
500	9	9q34	9q34	0.00961538	0	0.00961538	-0.018755	0.0379858	1	1	NA	NA	FCN1
501	9	9q34.3	9q34.3	0.0192308	0	0.0192308	-0.0177854	0.0562469	0.562743	1	NA	NA	OLFM1, C9orf62, PPP1R26, C9orf116, MRPS2, LCN1, OBP2A, PAEP, GLT6D1, LCN9, SOHLH1, KCNT1, CAMSAP1, UBAC1, NACC2, C9orf69, CARD9, DKFZP434A062, DNLZ, GPSM1, LHX3, QSOX2, SNAPC4, SDCCAG3, PMPCA, INPP5E, SEC16A, C9orf163, NOTCH1, MIR4673, MIR4674, U3.ENSG00000252440.1, AGPAT2, EGFL7, MIR126, FAM69B, SNHG7, LCN10, LCN6, LCN8, LCN15, TMEM141, KIAA1984, RABL6, C9orf172, EDF1, MAMDC4, MIR4292, PHPT1, MI…
502	9	9q34	9q34.3	0.00961538	0	0.00961538	-0.018755	0.0379858	1	1	NA	NA	NELFB, EXD3, NRARP, TOR4A, NOXA1, snoU13.ENSG00000272272.1, ENTPD8, NSMF, PNPLA7, DPH7, MRPL41, ZMYND19, ARRDC1, C9orf37
503	9	9q34.3	9q34.3	0.0192308	0	0.0192308	-0.0177854	0.0562469	0.562743	1	NA	NA	EHMT1, MIR602, CACNA1B, FAM157B, TUBBP5
504	10	10p15.3	10p15.3	0.0384615	0.0116279	0.0268336	-0.0271398	0.080807	0.487132	1	NA	NA	DIP2C
505	10	10p15.3	10p15.3	0.0288462	0.0116279	0.0172182	-0.0327495	0.067186	0.75256	1	NA	NA	RNA5SP297, RNA5SP298, TUBB8, ZMYND11, RN7SL754P
506	10	10p15.3	10p15.3	0.0288462	0.0116279	0.0172182	-0.0327495	0.067186	0.75256	1	NA	NA	MIR5699
507	10	10p15.3	10p15.3	0.0288462	0	0.0288462	-0.0139431	0.0716355	0.315843	1	NA	NA	PRR26
508	10	10p15.3	10p15.3	0.00961538	0	0.00961538	-0.018755	0.0379858	1	1	NA	NA	LARP4B, GTPBP4, ADARB2, IDI1, IDI2, LINC00200, WDR37, LINC00700, LINC00701
509	10	10p15.3-p15.2	10p15.1	0.00961538	0	0.00961538	-0.018755	0.0379858	1	1	NA	NA	PFKP, PITRM1, KLF6, LINC00702, LINC00703, LINC00704, LINC00705, AKR1E2
510	10	10p15-p14	10p15-p14	0.00961538	0	0.00961538	-0.018755	0.0379858	1	1	NA	NA	AKR1C1
511	10	10p15-p14	10p15.1	0.00961538	0	0.00961538	-0.018755	0.0379858	1	1	NA	NA	U8.ENSG00000238840.1, AKR1C2, U8.ENSG00000239148.1, AKR1C3, U8.ENSG00000251740.1, U8.ENSG00000239142.1, AKR1CL1, AKR1C4, U8.ENSG00000251909.1, AKR1C7P, UCN3, TUBAL3, NET1, CALML5, CALML3, ASB13, RN7SL445P, FAM208B, GDI2, ANKRD16, FBXO18, IL15RA, IL2RA, SNORA14, RBM17
512	10	10p15.1	10p15.1	0.00961538	0.0116279	-0.00201252	-0.0334377	0.0294127	1	1	NA	NA	PFKFB3
513	10	10p15.1	10p14	0.00961538	0	0.00961538	-0.018755	0.0379858	1	1	NA	NA	RN7SKP78, MIR3155A, DKFZP667F0711, PRKCQ, LINC00707, SFMBT2, ITIH5, ITIH2, KIN, ATP5C1, TAF3, GATA3, LINC00708, RNA5SP299, LINC00709
514	10	10p14	10p14	0.00961538	0	0.00961538	-0.018755	0.0379858	1	1	NA	NA	SFTA1P, LINC00710, CELF2, USP6NL, ECHDC3, PROSER2
515	10	10p14-p13	10p13	0.00961538	0	0.00961538	-0.018755	0.0379858	1	1	NA	NA	UPF2, DHTKD1, MIR548AK, SEC61A2, U6.ENSG00000272507.1, snoU13.ENSG00000238900.1, NUDT5, CDC123, RN7SL232P, RN7SL198P, CAMK1D, SNORD45.ENSG00000252438.1, RNU6ATAC39P, MIR4480, MIR548Q, CCDC3, RNA5SP300, OPTN, MCM10, UCMA, PHYH, SEPHS1, BEND7, PRPF18
516	10	10p13	10p13	0.0192308	0	0.0192308	-0.0177854	0.0562469	0.562743	1	NA	NA	FRMD4A
517	10	10p13	10p13	0.00961538	0	0.00961538	-0.018755	0.0379858	1	1	NA	NA	RNA5SP301, MIR4293, MIR1265, FAM107B, RNA5SP302, CDNF, HSPA14, SUV39H2, DCLRE1C, MEIG1, OLAH, ACBD7, C10orf111, NMT2, RPP38, FAM171A1, ITGA8, FAM188A, snoU13.ENSG00000239130.1, SNORA31.ENSG00000252537.1, snoU13.ENSG00000238552.1, PTER, C1QL3, RSU1
518	10	10p12.31	10p15.1	0.00961538	0	0.00961538	-0.018755	0.0379858	1	1	NA	NA	CUBN, TRDMT1
519	10	10p13	10p12.31	0.00961538	0	0.00961538	-0.018755	0.0379858	1	1	NA	NA	VIM, ST8SIA6, PTPLA, STAM, snoR442.ENSG00000251959.1, MRC1L1, MRC1, SLC39A12, TMEM236.ENSG00000148483.7, TMEM236.ENSG00000184040.7, CACNB2, NSUN6, ARL5B
520	10	10p12.31	10p12.31	0.0192308	0	0.0192308	-0.0177854	0.0562469	0.562743	1	NA	NA	C10orf112
521	10	10p12.31	10p12.31	0.00961538	0	0.00961538	-0.018755	0.0379858	1	1	NA	NA	U3.ENSG00000200545.1, RNA5SP303, PLXDC2, MIR4675, NEBL, C10orf113, U3.ENSG00000251749.1, CASC10, MIR1915, SKIDA1
522	10	10p12	10p12	0.0192308	0	0.0192308	-0.0177854	0.0562469	0.562743	1	NA	NA	MLLT10, DNAJC1, RN7SKP219
523	10	10p12	10p12.2	0.00961538	0	0.00961538	-0.018755	0.0379858	1	1	NA	NA	RN7SKP37, EBLN1, BMI1, COMMD3, SPAG6, PIP4K2A
524	10	10p12.31	10p12.2	0.00961538	0	0.00961538	-0.018755	0.0379858	1	1	NA	NA	ARMC3, RNA5SP304, MSRB2, SNORA40.ENSG00000252049.1, PTF1A, C10orf115, C10orf67, snoU13.ENSG00000238515.1, OTUD1
525	10	10p12.31	10p12.31	0.00961538	0.0116279	-0.00201252	-0.0334377	0.0294127	1	1	NA	NA	KIAA1217
526	10	10p12.31	10p12.1|10p12.3	0.00961538	0	0.00961538	-0.018755	0.0379858	1	1	NA	NA	MIR603
527	10	10p12.1|10p12.3	10p12.1	0.00961538	0.0116279	-0.00201252	-0.0334377	0.0294127	1	1	NA	NA	ARHGAP21, RNA5SP305, PRTFDC1, RN7SKP241, ENKUR, THNSL1, GPR158
528	10	10p12.1	10q11.21	0.00961538	0	0.00961538	-0.018755	0.0379858	1	1	NA	NA	RN7SKP220, RNA5SP306, MYO3A, GAD2, APBB1IP, RNA5SP307, LINC00264, PDSS1, ABI1, SNORA57.ENSG00000223027.1, snoU13.ENSG00000238414.1, LINC00614, ANKRD26, YME1L1, MASTL, ACBD5, LRRC37A6P, ARMC4P1, PTCHD3, RAB18, MKX, ARMC4, RN7SKP132, MPP7, U3.ENSG00000222666.1, RN7SKP39, WAC, RNU4ATAC6P, BAMBI, LINC00837, C10orf126, RNA5SP308, LYZL1, PTCHD3P1, SVIL, MIR604, SNORD115.ENSG00000212411.1, MIR938, KIAA1…
529	10	10q11.22	10q11.2	0.00961538	0.0116279	-0.00201252	-0.0334377	0.0294127	1	1	NA	NA	ZFAND4, AGAP10, AGAP4, AGAP9, ANTXRLP1, ANTXRL, ANXA8L1, ANXA8L2, ANXA8, ASAH2C, BMS1P1, BMS1P2, C10orf43, FAM21B, FAM21C, FAM25B, FAM25E, FAM25G, FAM35BP, GPRIN2, LINC00842, NPY4R, PTPN20A, RBP3, RN7SL248P, RN7SL453P, RNA5SP310, RNA5SP311, RNA5SP312, RNA5SP313, SYT15, ZNF488, GDF2, GDF10, BMS1P5, FAM25C, FRMPD2, GLUD1P2, PTPN20B, RN7SL527P, RNA5SP314, RNA5SP315, MAPK8, ARHGAP22, WDFY4, LRRC18, M…
530	10	10q11.23	10q21.1	0.00961538	0	0.00961538	-0.018755	0.0379858	1	1	NA	NA	AGAP6, ASAH2, FAM21A, LINC00843, RMRPP4, RNA5SP317, SGMS1, SNORA74.ENSG00000223111.1, TIMM23, ASAH2B, A1CF, PRKG1, MIR605, CSTF2T, DKK1, MBL2, RNA5SP318
531	10	10q21.1	10q21.1	0.00961538	0	0.00961538	-0.018755	0.0379858	1	1	NA	NA	PCDH15
532	10	10q21.1	10q21.1	0.00961538	0	0.00961538	-0.018755	0.0379858	1	1	NA	NA	MIR548F1
533	10	10q21.1	10q21	0.00961538	0	0.00961538	-0.018755	0.0379858	1	1	NA	NA	snoU13.ENSG00000238355.1, MTRNR2L5, ZWINT, SNORD2.ENSG00000238707.1, MIR3924, IPMK, snoU13.ENSG00000238970.1, CISD1, UBE2D1, TFAM
534	10	10q21.1	10q21.1	0.0192308	0	0.0192308	-0.0177854	0.0562469	0.562743	1	NA	NA	BICC1
535	10	10q21.1	10q21.3	0.00961538	0	0.00961538	-0.018755	0.0379858	1	1	NA	NA	RN7SKP196, LINC00844, PHYHIPL, FAM13C, SLC16A9, LINC00948, CCDC6, C10orf40, ANK3, CDK1, RHOBTB1, LINC00845, TMEM26, C10orf107, ARID5B, RTKN2, RN7SL591P, ZNF365, ADO, EGR2, NRBF2, JMJD1C, MIR1296, REEP3
536	10	10q22.2	10q22.2	0.00961538	0.0116279	-0.00201252	-0.0334377	0.0294127	1	1	NA	NA	CTNNA3
537	10	10q22.2	10q21.3	0.00961538	0	0.00961538	-0.018755	0.0379858	1	1	NA	NA	snoR442.ENSG00000252203.1, snoU13.ENSG00000239000.1
538	10	10q21.3	10q21.3	0.00961538	0.0116279	-0.00201252	-0.0334377	0.0294127	1	1	NA	NA	LRRTM3
539	10	10q22.1	10q22.2	0.00961538	0	0.00961538	-0.018755	0.0379858	1	1	NA	NA	DNAJC12, RN7SL394P, SIRT1, HERC4, RN7SL220P, MYPN, RN7SKP202, ATOH7, PBLD, HNRNPH3, RUFY2, DNA2, RNA5SP319, LINC00849, SLC25A16, TET1, snoU13.ENSG00000251926.1, CCAR1, SNORD98, STOX1, DDX50, DDX21, RN7SL373P, KIAA1279, SRGN, VPS26A, SUPV3L1, HKDC1, HK1, TACR2, TSPAN15, NEUROG3, C10orf35, COL13A1, H2AFY2, AIFM2, TYSND1, SAR1A, PPA1, NPFFR1, LRRC20, EIF4EBP2, NODAL, PALD1, PRF1, ADAMTS14, TBATA, SG…
540	10	10q22.3	10q22.3	0.0192308	0	0.0192308	-0.0177854	0.0562469	0.562743	1	NA	NA	C10orf11
541	10	10q22.3	10q22	0.00961538	0	0.00961538	-0.018755	0.0379858	1	1	NA	NA	RN7SL518P, SNORA31.ENSG00000252888.1, KCNMA1, RNA5SP321, DLG5, RN7SL284P, POLR3A, RPS24, LINC00856, LINC00595, SNORA71.ENSG00000201393.1, ZMIZ1, PPIF, ZCCHC24, ANXA11, EIF5AL1, LINC00857, MBL1P, NUTM2B, NUTM2E, PLAC9, SFTPA1, SFTPA2, SFTPD, TMEM254, MAT1A, DYDC1, DYDC2, FAM213A, TSPAN14, SH2D4B, NRG3, GHITM, C10orf99, CDHR1, LRIT2, LRIT1, RGR, LINC00858, CCSER2, RN7SKP84
542	10	10q22	10q22	0.0192308	0.0116279	0.00760286	-0.0347854	0.0499912	1	1	NA	NA	GRID1
543	10	10q22	10q22	0.00961538	0	0.00961538	-0.018755	0.0379858	1	1	NA	NA	RN7SKP238
544	10	10q22	10q23	0.00961538	0.0116279	-0.00201252	-0.0334377	0.0294127	1	1	NA	NA	RNA5SP322, MIR346, WAPAL, OPN4, LDB3, U3.ENSG00000252189.1, BMPR1A, MMRN2, SNCG, ADIRF, AGAP11, FAM25A, GLUD1, FAM35A, LINC00863, LINC00864, NUTM2A, NUTM2D, RN7SL733P, MINPP1, PAPSS2, ATAD1, CFL1P1, RN7SL78P, KLLN
545	10	10q23.3	10q23.3	0.00961538	0.0232558	-0.0136404	-0.0612267	0.0339459	0.868041	1	NA	NA	PTEN
546	10	10q23.3	10q23.31	0.00961538	0.0116279	-0.00201252	-0.0334377	0.0294127	1	1	NA	NA	SNORD74.ENSG00000200891.1, RNLS, LIPJ, LIPF, LIPK, LIPN, LIPM, ANKRD22
547	10	10q23.31	10q23.3	0.0192308	0.0116279	0.00760286	-0.0347854	0.0499912	1	1	NA	NA	STAMBPL1, ACTA2
548	10	10q24.1	10q24	0.00961538	0	0.00961538	-0.018755	0.0379858	1	1	NA	NA	FAS, snoU13.ENSG00000238991.1, CH25H, LIPA, IFIT2, IFIT3, IFIT1B, IFIT1, IFIT5, SLC16A12, PANK1, MIR107, KIF20B, LINC00865, RN7SKP143, HTR7, RPP30, ANKRD1, LINC00502, PCGF5, HECTD2, PPP1R3C, TNKS2, FGFBP3, BTAF1, CPEB3, SNORA25.ENSG00000252993.1, MARCH5, HHEX, IDE, KIF11, RN7SL644P, EXOC6, CYP26C1, CYP26A1, MYOF, CEP55, RNA5SP323, FFAR4, RBP4, PDE6C
549	10	10q23.33	10q23.33	0.00961538	0.0116279	-0.00201252	-0.0334377	0.0294127	1	1	NA	NA	FRA10AC1
550	10	10q24	10q24.1	0.00961538	0	0.00961538	-0.018755	0.0379858	1	1	NA	NA	LGI1, SLC35G1, PIPSL, PLCE1, RNY4P26, NOC3L, TBC1D12, HELLS, CYP2C18, CYP2C19, CYP2C9, CYP2C8, C10orf129, PDLIM1, SORBS1, ALDH18A1, TCTN3, ENTPD1, C10orf131, CC2D2B, CCNJ, MIR3157, ZNF518A, BLNK, DNTT, OPALIN, TLL2, TM9SF3, PIK3AP1, RNA5SP324, MIR607, LCOR, C10orf12, SLIT1, ARHGAP19, FRAT1, FRAT2
551	10	10q24.1	10q24.1	0.0192308	0	0.0192308	-0.0177854	0.0562469	0.562743	1	NA	NA	RRP12
552	10	10q25.3	10q23-q25	0.00961538	0	0.00961538	-0.018755	0.0379858	1	1	NA	NA	PGAM1, EXOSC1, ZDHHC16, MMS19, UBTD1, ANKRD2, HOGA1, PI4K2A, C10orf62, MORN4, AVPI1, MARVELD1, ZFYVE27, SFRP5, LINC00866, GOLGA7B, CRTAC1, R3HCC1L, LOXL4, PYROXD2, MIR1287, HPS1, MIR4685, HPSE2, CNNM1, GOT1, snoU13.ENSG00000238588.1, SLC25A28, ENTPD7, CUTC, COX15, ABCC2, DNMBP, snoU13.ENSG00000238472.1, CPN1, ERLIN1, CHUK, CWF19L1, SNORA12.ENSG00000212464.1, BLOC1S2, PKD2L1, SCD, LINC00263, WNT8B…
553	10	10q23-q25	10q23-q25	0.00961538	0	0.00961538	-0.018755	0.0379858	1	1	NA	NA	SORCS1
554	10	10q23-q25	10q26.13-q26.3	0.00961538	0	0.00961538	-0.018755	0.0379858	1	1	NA	NA	RNA5SP325, RNA5SP326, RN7SKP278, XPNPEP1, U4.ENSG00000272160.1, ADD3, RN7SL450P, MXI1, SMNDC1, DUSP5, SMC3, snoU13.ENSG00000239125.1, RN7SL686P, RBM20, RN7SKP288, RNA5SP327, PDCD4, BBIP1, MIR4680, SHOC2, MIR548E, ADRA2A, GPAM, TECTB, GUCY2GP, ACSL5, ZDHHC6, VTI1A, MIR4295, TCF7L2, HABP2, NRAP, CASP7, PLEKHS1, SNORA17.ENSG00000212589.1, DCLRE1A, NHLRC2, ADRB1, C10orf118, MIR2110, TDRD1, VWA2, AFAP…
555	10	10q26.13-q26.3	10q26.2	0.00961538	0	0.00961538	-0.018755	0.0379858	1	1	NA	NA	DOCK1, FAM196A
556	10	10q26.2	10q26.2	0.0192308	0	0.0192308	-0.0177854	0.0562469	0.562743	1	NA	NA	NPS
557	10	10q26.2	10q26.3	0.00961538	0	0.00961538	-0.018755	0.0379858	1	1	NA	NA	FOXI2, CLRN3, PTPRE, MKI67, MGMT, EBF3, MIR4297, LINC00959, GLRX3, MIR378C, TCERG1L, PPP2R2D, BNIP3, JAKMIP3, DPYSL4, STK32C, LRRC27, PWWP2B, C10orf91
558	10	10q26.3	10q26.3	0.0192308	0	0.0192308	-0.0177854	0.0562469	0.562743	1	NA	NA	INPP5A
559	10	10q26.3	10q26.3	0.00961538	0	0.00961538	-0.018755	0.0379858	1	1	NA	NA	TTC40
560	10	10q26	10q26.3	0.0192308	0	0.0192308	-0.0177854	0.0562469	0.562743	1	NA	NA	GPR123, KNDC1, UTF1, VENTX, MIR202, ADAM8, TUBGCP2, ZNF511, CALY, PRAP1
561	10	10q26.3	10q26.3	0.0192308	0	0.0192308	-0.0177854	0.0562469	0.562743	1	NA	NA	FUOM, ECHS1, MIR3944, PAOX, MTG1, CYP2E1, FRG2B, SPRN, SYCE1
562	11	11p15.5	11p15.5	0.0192308	0.0116279	0.00760286	-0.0347854	0.0499912	1	1	NA	NA	ANO9, ATHL1, B4GALNT4, BET1L, IFITM1, IFITM2, IFITM3, IFITM5, NLRP6, ODF3, PKP3, PSMD13, PTDSS2, RIC8A, RN7SL838P, SCGB1C1, SIGIRR, SIRT3, RNH1, HRAS, LRRC56, C11orf35, RASSF7, MIR210HG, MIR210, PHRF1, CDHR5, IRF7, SCT, DRD4, DEAF1
563	11	11p15.5	11p15.5	0.0192308	0	0.0192308	-0.0177854	0.0562469	0.562743	1	NA	NA	EPS8L2, TMEM80, TALDO1, PDDC1, CEND1, SLC25A22, PIDD, RPLP2, SNORA52, PNPLA2, CD151, EFCAB4A, POLR2L, TSPAN4, CHID1, AP2A2, MUC6
564	11	11p15.5	11p15.5	0.0192308	0	0.0192308	-0.0177854	0.0562469	0.562743	1	NA	NA	MUC2
565	11	11p15.5	11p15.4	0.0192308	0	0.0192308	-0.0177854	0.0562469	0.562743	1	NA	NA	MUC5AC, MUC5B, TOLLIP, BRSK2, MOB2, DUSP8, CTSD, FAM99A, FAM99B, IFITM10, LSP1.ENSG00000130592.9, MIR4298, SYT8, TNNI2, C11orf89, TNNT3, MRPL23, H19, IGF2, MIR483, INS, MIR4686, TH, ASCL2, C11orf21, TSPAN32, RPL26P30, CD81, TRPM5, TSSC4, KCNQ1, KCNQ1OT1, KCNQ1DN, CDKN1C, SLC22A18AS, SLC22A18, PHLDA2, NAP1L4, SNORA54, CARS, OSBPL5, MRGPRE, MRGPRG, ZNF195, TSSC2
566	11	11p15.4	11p15.4	0.0288462	0	0.0288462	-0.0139431	0.0716355	0.315843	1	NA	NA	TRPC2, ART1, ART5, CHRNA10, NUP98, snoU13.ENSG00000238686.1
567	11	11p15.4	11p15.4	0.0192308	0	0.0192308	-0.0177854	0.0562469	0.562743	1	NA	NA	PGAP2, RHOG, MIR4687, STIM1, SNORA7.ENSG00000206976.1, RRM1, OR52B4, TRIM21, OR52K2, OR52K1, OR52M1, C11orf40, OR52I2, OR52I1, TRIM68, OR51D1, OR51E1, OR51E2, OR51C1P, MMP26, SNORA62.ENSG00000201980.1, OR51F1, OR52R1, OR51F2, OR51S1, OR51H1P, OR51T1, OR51A7, OR51G2, OR51G1, OR51A2, OR51A4, OR51L1, OR52J3, OR52E2, OR52A4, OR52A5, OR52A1, OR51V1, HBB, HBD, HBBP1, HBG1, HBG2, HBE1, OR51B4, OR51B2, O…
568	11	11p15.4	11p15.4	0.0288462	0	0.0288462	-0.0139431	0.0716355	0.315843	1	NA	NA	OR10A2
569	11	11p15.4	11p15.1	0.0192308	0	0.0192308	-0.0177854	0.0562469	0.562743	1	NA	NA	OR10A4, OR2D2, OR2D3, ZNF215, ZNF214, NLRP14, RBMXL2, MIR302E, SYT9, OLFML1, PPFIBP2, CYB5R2, OVCH2, OR10AB1P, OR5P2, OR5P3, OR10A6, OR10A3, NLRP10, EIF3F, TUB, RIC3, LMO1, STK33, SCARNA20.ENSG00000252778.1, TRIM66, RPL27A, SNORA3.ENSG00000200983.1, SNORA45, ST5, RNA5SP330, AKIP1, C11orf16, ASCL3, TMEM9B, NRIP3, SCUBE2, MIR5691, DENND5A, TMEM41B, IPO7, SNORA23, ZNF143, RN7SL56P, WEE1, snoU13.ENSG…
570	11	11p15.1	11p15.1	0.0288462	0	0.0288462	-0.0139431	0.0716355	0.315843	1	NA	NA	KCNJ11
571	11	11p15.1	11p15.1	0.0192308	0	0.0192308	-0.0177854	0.0562469	0.562743	1	NA	NA	ABCC8, USH1C, OTOG, MYOD1, KCNC1, SERGEF, TPH1, SAAL1, SAA3P, MRGPRX3, MRGPRX4, SAA4, SAA2, RNA5SP333, RNA5SP334, SAA1, HPS5, GTF2H1, MIR3159, LDHA, LDHC, LDHAL6A, TSG101, UEVLD, SPTY2D1, TMEM86A, IGSF22, PTPN5, MRGPRX1, MRGPRX2, ZDHHC13, CSRP3, E2F8, NAV2, RNA5SP335, MIR4486, SNORA1.ENSG00000207407.1, MIR4694, DBX1, HTATIP2, PRMT3, SLC6A5
572	11	11p15.1	11p15.1	0.0288462	0	0.0288462	-0.0139431	0.0716355	0.315843	1	NA	NA	NELL1
573	11	11p15.1	11p14.3	0.0192308	0	0.0192308	-0.0177854	0.0562469	0.562743	1	NA	NA	RNA5SP336, RNA5SP337
574	11	11p14.3	11p14.3	0.0288462	0	0.0288462	-0.0139431	0.0716355	0.315843	1	NA	NA	ANO5
575	11	11p14.3	11p14.3	0.0192308	0	0.0192308	-0.0177854	0.0562469	0.562743	1	NA	NA	SLC17A6
576	11	11p15	11p14.2	0.0192308	0	0.0192308	-0.0177854	0.0562469	0.562743	1	NA	NA	FANCF, GAS2, RNA5SP338
577	11	11p14.2	11p14.2	0.00961538	0	0.00961538	-0.018755	0.0379858	1	1	NA	NA	SVIP, CCDC179
578	11	11p14.3	11p13	0.0288462	0	0.0288462	-0.0139431	0.0716355	0.315843	1	NA	NA	LUZP2, ANO3, MUC15, SLC5A12, FIBIN, BBOX1, CCDC34, LGR4, LIN7C, RNA5SP339, LINC00678, BDNF, KIF18A, MIR610, METTL15, RN7SKP158, RN7SL240P, KCNA4, FSHB, ARL14EP, MPPED2, DCDC1, DNAJC24, IMMP1L, ELP4, PAX6, RCN1, U3.ENSG00000212551.1, WT1, EIF3M, CCDC73, PRRG4
579	11	11p13	11p13	0.0192308	0	0.0192308	-0.0177854	0.0562469	0.562743	1	NA	NA	QSER1, DEPDC7, TCP11L1, CSTF3, HIPK3, KIAA1549L, C11orf91, CD59, FBXO3, LMO2, CAPRIN1, NAT10
580	11	11p13	11p13	0.0288462	0	0.0288462	-0.0139431	0.0716355	0.315843	1	NA	NA	ABTB2, CAT, ELF5, EHF, APIP, PDHX, MIR1343, CD44, SLC1A2, PAMR1, FJX1, TRIM44
581	11	11p13	11p13	0.0288462	0.0116279	0.0172182	-0.0327495	0.067186	0.75256	1	NA	NA	LDLRAD3
582	11	11p13	11p12	0.0384615	0	0.0384615	-0.00911978	0.0860429	0.183345	1	NA	NA	MIR3973, COMMD9, LINC00610, PRR5L, TRAF6, RAG1, RAG2, C11orf74, SNORA31.ENSG00000251838.1, LRRC4C
583	11	11p12	11p12-p11	0.00961538	0	0.00961538	-0.018755	0.0379858	1	1	NA	NA	HNRNPKP3, API5, TTC17, RN7SKP287, HSD17B12, MIR670, ALKBH3, C11orf96, ACCSL, ACCS, EXT2
584	11	11p11.2	11p11.2	0.0192308	0	0.0192308	-0.0177854	0.0562469	0.562743	1	NA	NA	ALX4
585	11	11p11.2	11p11.2	0.00961538	0	0.00961538	-0.018755	0.0379858	1	1	NA	NA	CD82, TSPAN18, TP53I11, PRDM11, SYT13, CHST1, SLC35C1, CRY2
586	11	11p11.2	11p11.2	0	0	0	0	0	NA	NA	NA	NA	MAPK8IP1, C11orf94, PEX16, GYLTL1B, PHF21A, CREB3L1, DGKZ, CHRM4, MDK, MIR4688, AMBRA1, HARBI1, ATG13, ARHGAP1, ZNF408, F2, CKAP5, MIR5582, SNORD67.ENSG00000252427.1, SNORD67.ENSG00000212135.1, LRP4, C11orf49, ARFGAP2, PACSIN3, RN7SL772P, DDB2, ACP2, NR1H3, MADD, MYBPC3, SPI1, MIR4487, SLC39A13, PSMC3, RAPSN, CELF1, RN7SL652P, NDUFS3, PTPMT1, KBTBD4, C1QTNF4, FAM180B, MTCH2
587	11	11p11.2	11p11.12	0.00961538	0	0.00961538	-0.018755	0.0379858	1	1	NA	NA	AGBL2, FNBP4, snoU13.ENSG00000252447.1, NUP160, RNA5SP340, PTPRJ, MIR3161, OR4B1, OR4X2, OR4X1, OR4S1, OR4C3, OR4A47, OR4C5, TRIM49B, TRIM64C, FOLH1, OR4C13, OR4C12
588	11	11q11	11q12.1	0	0	0	0	0	NA	NA	NA	NA	OR10AG1, OR4A15, OR4A16, OR4A5, OR4C11, OR4C15, OR4C16, OR4C46, OR4C6, OR4P4, OR4S2, OR5AS1, OR5D13, OR5D14, OR5D16, OR5D18, OR5F1, OR5I1, OR5J2, OR5L1, OR5L2, OR5T2, OR5W2, OR8H2, OR8H3, OR8I2, OR8J3, OR8K5, TRIM48, TRIM51HP, TRIM51, OR5T3, OR5T1, OR8H1, OR8K3, OR8K1, OR8J1, OR8U1, OR5R1, OR5M9, OR5M3, OR5M8, OR5M11, OR5M10, OR5M1, OR5AP2, OR5AR1, OR9G1, OR9G4, OR5G5P, OR5AK2, LRRC55, APLNR, TNK…
589	11	11q12.1	11q12.1	0	0	0	0	0	NA	NA	NA	NA	GLYATL2, GLYATL1P2, GLYATL1
590	11	11q12.1	11q12.2	0	0	0	0	0	NA	NA	NA	NA	FAM111B, FAM111A, DTX4, MPEG1, RN7SL42P, RN7SL435P, OR5AN1, OR5A2, OR5A1, OR4D6, OR4D10, OR4D11, OR4D9, OSBP, MIR3162, PATL1, RN7SKP192, OR10V1, STX3, MRPL16, GIF, TCN1, OOSP1, PLAC1L, MS4A3, MS4A2, MS4A6A, MS4A4E
591	11	11q12	11q12	0	0	0	0	0	NA	NA	NA	NA	MS4A4A, MS4A6E, MS4A14, MS4A7, MS4A5, MS4A1
592	11	11q12	11q12-q13	0	0	0	0	0	NA	NA	NA	NA	MS4A12, MS4A13, LINC00301, MS4A8, MS4A18, MS4A15, MS4A10, CCDC86, PTGDR2, ZP1, PRPF19, TMEM109, TMEM132A, SLC15A3, CD6, CD5, VPS37C, PGA3, PGA4, PGA5, VWCE, DDB1, DAK, CYB561A3, TMEM138, TMEM216, CPSF7, SDHAF2, RN7SL23P, PPP1R32, LRRC10B, MIR4488, SYT7, RPLP0P2, DAGLA, MYRF, TMEM258, FADS2, FEN1, MIR611, FADS1, MIR1908, FADS3, RAB3IL1, BEST1, FTH1, INCENP, SCGB1D1, SCGB2A1, SCGB1D2, SCGB2A2, SCGB…
593	11	11q12.3	11q12.3	0	0	0	0	0	NA	NA	NA	NA	STX5
594	11	11q12.3	11q12.3	0	0	0	0	0	NA	NA	NA	NA	RN7SL119P
595	11	11q12.3	11q12.3	0	0	0	0	0	NA	NA	NA	NA	WDR74, SNHG1
596	11	11q13	11q13	0	0	0	0	0	NA	NA	NA	NA	SLC3A2, CHRM1, RN7SL259P, SLC22A6, SLC22A8, SLC22A24, SLC22A10, SLC22A25, SLC22A9, HRASLS5, LGALS12, RARRES3, HRASLS2, PLA2G16, ATL3, RTN3, C11orf95, RN7SL596P, C11orf84, MARK2, RCOR2, NAA40, COX8A, OTUB1, MACROD1, FLRT1, STIP1, FERMT3, TRPT1, NUDT22, DNAJC4, VEGFB, FKBP2, PLCB3, PPP1R14B, BAD, GPR137, KCNK4, TEX40, ESRRA, PRDX5, TRMT112, CCDC88B, RPS6KA4, MIR1237, SLC22A11, SLC22A12, NRXN2, RASG…
597	11	11q13.3	11q14.3	0	0	0	0	0	NA	NA	NA	NA	GAL, MTL5, CPT1A, MRPL21, IGHMBP2, MRGPRD, MRGPRF, TPCN2, MIR3164, MYEOV, CCND1, ORAOV1, FGF19, FGF4, FGF3, ANO1, FADD, PPFIA1, MIR548K, CTTN, SHANK2, MIR3664, DHCR7, NADSYN1, UNC93B6, ENPP7P8, FAM86C1, ZNF705E, DEFB108B, RNA5SP342, RNF121, IL18BP, NUMA1, MIR3165, LRTOMT, LAMTOR1, snoU13.ENSG00000238768.1, ANAPC15, FOLR3, FOLR1, FOLR2, INPPL1, PHOX2A, CLPB, PDE2A, MIR139, ARAP1, STARD10, MIR4692,…
598	11	11q14.3	11q14.3	0.0192308	0	0.0192308	-0.0177854	0.0562469	0.562743	1	NA	NA	DISC1FP1
599	11	11q14.3	11q14.3	0.00961538	0	0.00961538	-0.018755	0.0379858	1	1	NA	NA	MIR4490
600	11	11q14.3	11q21	0	0	0	0	0	NA	NA	NA	NA	MIR1261, FAT3, snoU13.ENSG00000239086.1, MTNR1B, CCDC67, SLC36A4, SMCO4, RN7SL223P, KIAA1731, SCARNA9, SNORA25.ENSG00000207112.1, TAF1D, SNORA1.ENSG00000206834.1, SNORA32.ENSG00000206799.1, SNORA8.ENSG00000207304.1, SNORD6, MIR1304, SNORA18.ENSG00000207145.1, SNORD5.ENSG00000239195.1, SNORA40.ENSG00000210825.1, C11orf54, MED17, RN7SL195P, snoU13.ENSG00000238437.1, VSTM5, HEPHL1, PANX1, FOLR4, GPR…
601	11	11q21	11q22.1	0	0	0	0	0	NA	NA	NA	NA	FAM76B, CEP57, MTMR2, RNA5SP345, MAML2, MIR1260B, CCDC82, JRKL, RNA5SP346
602	11	11q22.1	11q22.1	0	0.0116279	-0.0116279	-0.0449069	0.0216511	0.923984	1	NA	NA	RNA5SP347
603	11	11q22.1	11q22.1	0.00961538	0	0.00961538	-0.018755	0.0379858	1	1	NA	NA	CNTN5
604	11	11q22.1	11q22.1	0	0	0	0	0	NA	NA	NA	NA	RN7SKP53
605	11	11q22.1	11q22.3	0	0	0	0	0	NA	NA	NA	NA	RN7SL222P, ARHGAP42, RN7SKP115, snoU13.ENSG00000238388.1, TMEM133, PGR, TRPC6, MIR3920, ANGPTL5, KIAA1377, C11orf70, snoU13.ENSG00000252679.1, snoU13.ENSG00000239154.1, YAP1, BIRC2, BIRC3, TMEM123, MMP7, MMP20, MMP27, MMP8, WTAPP1, MMP10, MMP1, MMP3, MMP12, MMP13, DCUN1D5, DYNC2H1, MIR4693, PDGFD, DDI1
606	11	11q23-q24	11q22.3	0.00961538	0	0.00961538	-0.018755	0.0379858	1	1	NA	NA	RNA5SP348
607	11	11q22.3	11q23-q24	0	0	0	0	0	NA	NA	NA	NA	CASP12, CASP4, CASP5, CASP1, CARD16, CARD17, CARD18, GRIA4, MSANTD4, KBTBD3, AASDHPPT, GUCY1A2, CWF19L2, ALKBH8, ELMOD1, SLN, SLC35F2, CUL5, RAB39A, ACAT1, NPAT, ATM, C11orf65, KDELC2, EXPH5, DDX10, RNA5SP349, SNORD39.ENSG00000264997.1, C11orf87, ZC3H12C, RDX, FDX1, ARHGAP20, RNA5SP350, C11orf53, C11orf92, C11orf93, MIR4491, POU2AF1, BTG4, C11orf88, MIR34B, MIR34C, LAYN, SIK2, RN7SKP273, PPP2R1B,…
608	11	11q23.3	11q23.3	0	0.0116279	-0.0116279	-0.0449069	0.0216511	0.923984	1	NA	NA	SIK3, RNY4P6
609	11	11q23	11q23	0	0	0	0	0	NA	NA	NA	NA	PAFAH1B2, SIDT2, TAGLN, PCSK7, RNF214, SCARNA11.ENSG00000252992.1, BACE1, CEP164, DSCAML1, FXYD2, FXYD6, TMPRSS13, IL10RA, TMPRSS4, SCN4B, SCN2B, AMICA1, MPZL3, MPZL2, CD3E, CD3D, CD3G, UBE4A, ATP5L, RN7SL86P
610	11	11q23	11q23	0.00961538	0.0232558	-0.0136404	-0.0612267	0.0339459	0.868041	1	NA	NA	KMT2A
611	11	11q23.3	11q23.3	0	0.0116279	-0.0116279	-0.0449069	0.0216511	0.923984	1	NA	NA	TMEM25, TTC36, IFT46, ARCN1, PHLDB1, TREH, DDX6, CXCR5, BCL9L, MIR4492, UPK2, RN7SL688P, FOXR1, RN7SL529P, CCDC84, RPS25, MIR3656, TRAPPC4, SLC37A4, HYOU1, VPS11, HMBS, DPAGT1, H2AFX, C2CD2L, HINFP, ABCG4, NLRX1, PDZD3, CCDC153, CBL, MCAM, ACA64.ENSG00000252119.1, RNF26, C1QTNF5, MFRP, USP2, THY1, PVRL1
612	11	11q23.3	11q24.2	0	0	0	0	0	NA	NA	NA	NA	TRIM29, OAF, POU2F3, TMEM136, ARHGEF12, GRIK4, TBCEL, TECTA, SC5D, SORL1, MIR125B1, BLID, MIRLET7A2, MIR100, RNU4ATAC10P, RNU4ATAC5P, UBASH3B, snoU13.ENSG00000239079.1, CRTAM, C11orf63, BSX, HSPA8, SNORD14E, SNORD14C, SNORD14D, CLMP, U8.ENSG00000200496.1, MIR4493, GRAMD1B, SCN3B, ZNF202, OR6X1, OR6M1, TMEM225, OR8D4, OR4D5, OR6T1, OR10S1, OR10G4, OR10G9, OR10G8, OR10G7, VWA5A, OR10D3, OR8D1, OR8D…
613	11	11q24.2	11q24.2	0	0.0116279	-0.0116279	-0.0449069	0.0216511	0.923984	1	NA	NA	RPUSD4
614	11	11q24.2	11q25	0	0	0	0	0	NA	NA	NA	NA	FAM118B, RN7SL351P, SRPR, FOXRED1, TIRAP, snoU13.ENSG00000238855.1, DCPS, ST3GAL4, KIRREL3, MIR3167, RN7SKP121, RN7SKP279, ETS1, FLI1, KCNJ1, KCNJ5, C11orf45, TP53AIP1, ARHGAP32, BARX2, TMEM45B, NFRKB, PRDM10, LINC00167, APLP2, ST14, ZBTB44, ADAMTS8, ADAMTS15, C11orf44, SNX19, RN7SL167P, NTM, RNU6ATAC12P, OPCML, snoU13.ENSG00000238693.1, SPATA19, MIR4697, IGSF9B, JAM3, NCAPD3, VPS26B, THYN1, ACAD…
615	12	12p13.33	12p13.3	0.0288462	0.0116279	0.0172182	-0.0327495	0.067186	0.75256	1	NA	NA	B4GALNT3, CCDC77, FAM138D, IQSEC3, KDM5A, NINJ2, RNU4ATAC16P, SLC6A12, SLC6A13, WNK1, RAD52, ERC1, RN7SL852P, ADIPOR2, FBXL14, LINC00942, MIR3649, WNT5B, CACNA2D4, LRTM2, LINC00940, DCP1B, CACNA1C, CBX3P4, FKBP4, ITFG2, NRIP2, FOXM1, RHNO1, TULP3, TEAD4, TSPAN9, PRMT8, EFCAB4B, PARP11, CCND2, C12orf5, FGF23, FGF6, C12orf4
616	12	12p13.2-p13.1	12p13.3	0.0192308	0.0116279	0.00760286	-0.0347854	0.0499912	1	1	NA	NA	RAD51AP1, DYRK4, NDUFA9, AKAP3, GALNT8, KCNA6, KCNA1, KCNA5, NTF3, ANO2, VWF, RN7SL69P, CD9, PLEKHG6, TNFRSF1A, RN7SL391P, SCNN1A, LTBR, CD27, TAPBPL, VAMP1, MRPL51, NCAPD2, SCARNA10, GAPDH, IFFO1, NOP2, CHD4, SCARNA11.ENSG00000251898.1, LPAR5, ACRBP, ING4, ZNF384, PIANP, COPS7A, MLF2, PTMS, LAG3, RN7SL380P, CD4, GPR162, LEPREL2, GNB3, CDCA3, USP5, SPSB2, TPI1, LRRC23, RPL13P5, DSTNP2, ENO2, ATN1…
617	12	12p13.1	12p13.31	0.0288462	0.0116279	0.0172182	-0.0327495	0.067186	0.75256	1	NA	NA	APOBEC1, GDF3, DPPA3, CLEC4C, NANOGNB, NANOG, NANOGP1, SLC2A14, SLC2A3, FOXJ2, C3AR1, NECAP1, CLEC4A, ZNF705A, FAM66C, FAM86FP, FAM90A1, LINC00937
618	12	12p13	12p13.2	0.0288462	0.0232558	0.00559034	-0.0452702	0.0564509	1	1	NA	NA	CLEC6A, CLEC4D, CLEC4E, SCARNA11.ENSG00000252727.1, AICDA, MFAP5, RIMKLB, A2ML1, PHC1, M6PR, KLRG1, LINC00612, A2M, PZP, A2MP1, LINC00987, SNORA75.ENSG00000212432.1, SNORA75.ENSG00000212440.1, KLRB1, CLEC2D, CLECL1, CD69, KLRF1, CLEC2B, KLRF2, CLEC2A, CLEC12A, CLEC1B, CLEC12B
619	12	12p13.2	12p13.2	0.0288462	0.0348837	-0.00603757	-0.0624596	0.0503845	1	1	NA	NA	CLEC9A, CLEC1A, RN7SKP161, CLEC7A, OLR1, TMEM52B
620	12	12p13.2	12p13	0.0384615	0.0348837	0.00357782	-0.053571	0.0607266	1	1	NA	NA	GABARAPL1, KLRD1
621	12	12p13.2-p12.3	12p13.2	0.0480769	0.0348837	0.0131932	-0.0539464	0.0803328	0.929993	1	NA	NA	KLRK1, KLRC4, KLRC1, KLRC2, KLRC3, EIF2S3L, KLRAP1, MAGOHB, STYK1, YBX3, TAS2R7, TAS2R8, TAS2R9, PRR4, TAS2R10, PRH1, TAS2R13, PRH2, TAS2R14, TAS2R50, TAS2R20, TAS2R19, TAS2R30, TAS2R31, TAS2R42, TAS2R43, TAS2R46, TAS2R64P, PRB3, PRB4
622	12	12p13.2	12p13.2	0.0576923	0.0348837	0.0228086	-0.0470742	0.0926914	0.693862	1	NA	NA	PRB1, PRB2
623	12	12p13	12p12.3	0.0673077	0.0348837	0.032424	-0.0400252	0.104873	0.502922	1	NA	NA	ETV6, BCL2L14, LRP6, MANSC1, LOH12CR2, LOH12CR1, DUSP16, CREBL2, GPR19, CDKN1B, APOLD1, MIR613, DDX47, GPRC5A, GPRC5D, GSG1, HEBP1, HTR7P1, KIAA1467, MIR614, SNORD88, EMP1
624	12	12p13.1	12p12	0.0576923	0.0232558	0.0344365	-0.0311641	0.100037	0.415875	1	NA	NA	C12orf36, RNA5SP353, GRIN2B, RN7SKP162, RN7SL46P, RN7SL676P, RPL30P11, ATF7IP, PLBD1, RN7SKP134
625	12	12p12	12p12.3	0.0673077	0.0232558	0.0440519	-0.0243058	0.11241	0.280255	1	NA	NA	GUCY2C, H2AFJ, HIST4H4, WBP11, C12orf60, SMCO3, ART4, MGP, ERP27, ARHGDIB, PDE6H, RERG, PTPRO, EPS8
626	12	12p12.3	12p12.3	0.0576923	0.0232558	0.0344365	-0.0311641	0.100037	0.415875	1	NA	NA	STRAP
627	12	12p12.3	12p12.3-p12.1	0.0480769	0.0232558	0.0248211	-0.0378109	0.0874532	0.605032	1	NA	NA	DERA, SLC15A5, MGST1
628	12	12p12.3	12p12.3	0.0384615	0.0232558	0.0152057	-0.0442079	0.0746193	0.85727	1	NA	NA	LMO3
629	12	12p12.3	12p12.3	0.0576923	0.0232558	0.0344365	-0.0311641	0.100037	0.415875	1	NA	NA	RERGL, PIK3C2G, PLCZ1, CAPZA3, PLEKHA5, RN7SL459P, RN7SL67P, AEBP2
630	12	12p12	12p12.2	0.0384615	0.0232558	0.0152057	-0.0442079	0.0746193	0.85727	1	NA	NA	PDE3A, SLCO1C1, SLCO1B3, LST3, SLCO1B7
631	12	12p	12p12.1	0.0384615	0.0232558	0.0152057	-0.0442079	0.0746193	0.85727	1	NA	NA	SLCO1B1, SLCO1A2, IAPP, PYROXD1, RECQL, GOLT1B, C12orf39, GYS2, LDHB, KCNJ8, ABCC9, CMAS, ST8SIA1, C2CD5, ETNK1, SOX5, MIR920, LINC00477, RN7SL38P, BCAT1, C12orf77, LRMP, CASC1
632	12	12p12.1	12p12.1-p11.2	0.0384615	0.0116279	0.0268336	-0.0271398	0.080807	0.487132	1	NA	NA	LYRM5, KRAS, IFLTD1, RN7SKP262, RASSF8, BHLHE41, SSPN, ITPR2, RNA5SP354, ASUN, FGFR1OP2, TM7SF3, MED21, C12orf71, STK38L, ARNTL2, SMCO2, PPFIBP1, REP15, MRPS35, MANSC4, KLHL42, RN7SKP15
633	12	12p12.1-p11.2	12p11.22	0.0288462	0.0116279	0.0172182	-0.0327495	0.067186	0.75256	1	NA	NA	PTHLH, CCDC91, RNA5SP355
634	12	12p11.22	12p11.22	0.0384615	0.0116279	0.0268336	-0.0271398	0.080807	0.487132	1	NA	NA	FAR2, ERGIC2, OVCH1
635	12	12p11.22	12p11.21	0.0288462	0.0116279	0.0172182	-0.0327495	0.067186	0.75256	1	NA	NA	TMTC1, U3.ENSG00000253052.1, RNA5SP356
636	12	12p11.21	12p11.21	0.0192308	0.0116279	0.00760286	-0.0347854	0.0499912	1	1	NA	NA	IPO8, CAPRIN2, LINC00941
637	12	12p11.21	12p11.21	0.0192308	0.0116279	0.00760286	-0.0347854	0.0499912	1	1	NA	NA	TSPAN11, DDX11, SNORA75.ENSG00000212533.1, FAM60A, snoU13.ENSG00000238661.1, DENND5B, snoU13.ENSG00000239033.1, METTL20, AMN1, STMN1P1, H3F3C, SNORA25.ENSG00000252204.1, KIAA1551, BICD1, FGD4
638	12	12p11.21	12p11.1	0.00961538	0.0116279	-0.00201252	-0.0334377	0.0294127	1	1	NA	NA	DNM1L, YARS2, PKP2, SNORD112.ENSG00000251863.1, ALG10B, ALG10, CPNE8, RNA5SP358, RNA5SP359, SYT10
639	12	12q12	12q12	0.00961538	0	0.00961538	-0.018755	0.0379858	1	1	NA	NA	KIF21A, ABCD2, C12orf40, SLC2A13, SNORA22.ENSG00000199571.1, LRRK2
640	12	12q12	12q11-q12	0.0192308	0	0.0192308	-0.0177854	0.0562469	0.562743	1	NA	NA	MUC19, CNTN1
641	12	12q12	12q12	0.00961538	0	0.00961538	-0.018755	0.0379858	1	1	NA	NA	PDZRN4, RNA5SP360
642	12	12q12	12q12	0.0192308	0	0.0192308	-0.0177854	0.0562469	0.562743	1	NA	NA	GXYLT1, YAF2, PPHLN1, RN7SL10P, ZCRB1, SNORA74.ENSG00000252917.1, PRICKLE1, ADAMTS20, PUS7L, IRAK4, TWF1, TMEM117, NELL2, DBX2, RNA5SP361, PLEKHA8P1, ANO6
643	12	12q12	12q12	0.0288462	0	0.0288462	-0.0139431	0.0716355	0.315843	1	NA	NA	ARID2, RN7SL246P
644	12	12q12	12q12	0.0192308	0	0.0192308	-0.0177854	0.0562469	0.562743	1	NA	NA	SCAF11
645	12	12q13.11	12q13.11	0.0288462	0	0.0288462	-0.0139431	0.0716355	0.315843	1	NA	NA	SLC38A1, SLC38A2, SLC38A4, AMIGO2, PCED1B, MIR4698, SNORA64.ENSG00000199566.1, MIR4494
646	12	12q13.11	12q13.11	0.0384615	0	0.0384615	-0.00911978	0.0860429	0.183345	1	NA	NA	RPAP3, ENDOU, RAPGEF3, SLC48A1, HDAC7, VDR
647	12	12q13.1	12q13.1	0.0288462	0	0.0288462	-0.0139431	0.0716355	0.315843	1	NA	NA	TMEM106C
648	12	12q13.11	12q13.12	0.0192308	0	0.0192308	-0.0177854	0.0562469	0.562743	1	NA	NA	COL2A1, SENP1, PFKM, ASB8, C12orf68, DKFZP779L1853, OR10AD1, H1FNT, ZNF641, ANP32D, C12orf54, OR8S1, LALBA, KANSL2, SNORA34, SNORA2A, SNORA2B, CCNT1, LINC00935, ADCY6, MIR4701, CACNB3, DDX23, RND1, ARF3, CCDC65, FKBP11, snoU13.ENSG00000238395.1, WNT10B, WNT1, DDN, PRKAG1, KMT2D, RHEBL1, DHH, LMBR1L, TUBA1B, TUBA1A, TUBA1C, PRPH, C1QL4, TROAP, DNAJC22, SPATS2, KCNH3, MCRS1, PRPF40B, FAM186B, FMNL3…
649	12	12q13.12	12q13.2	0.00961538	0	0.00961538	-0.018755	0.0379858	1	1	NA	NA	DIP2B, ATF1, RN7SL519P, TMPRSS12, METTL7A, HIGD1C, SLC11A2, U6.ENSG00000272028.1, LETMD1, CSRNP2, TFCP2, POU6F1, DAZAP2, SMAGP, BIN2, CELA1, GALNT6, SLC4A8, SCN8A, ACVRL1, ANKRD33, ACVR1B, GRASP, NR4A1, C12orf44, OR7E47P, KRT80, C12orf80, LINC00592, KRT7, KRT121P, KRT86, KRT81, KRT83, KRT84, KRT85, KRT82, KRT6B, KRT6C, KRT75, KRT6A, KRT5, KRT71, KRT74, KRT72, KRT73, KRT2, KRT1, KRT77, KRT76, KRT3…
650	12	12q13.2	12q13.2	0.00961538	0	0.00961538	-0.018755	0.0379858	1	1	NA	NA	OR6C74
651	12	12q13.2	12q14	0.00961538	0	0.00961538	-0.018755	0.0379858	1	1	NA	NA	OR6C6, OR6C1, OR6C3, OR6C75, OR6C65, OR6C76, OR6C2, OR6C70, OR6C68, OR6C4, OR2AP1, OR10P1, METTL7B, ITGA7, BLOC1S1, RDH5, CD63, GDF11, SARNP, DNAJC14, ORMDL2, TMEM198B, MMP19, WIBG, DGKA, PMEL, CDK2, RAB5B, SUOX, IKZF4, RPS26, ERBB3, PA2G4, RPL41, ESYT1, ZC3H10, MYL6B, MYL6, SMARCC2, RN7SL770P, RNF41, NABP2, SLC39A5, ANKRD52, COQ10A, CS, CNPY2, PAN2, IL23A, STAT2, APOF, TIMELESS, MIP, SPRYD4, GLS…
652	12	12q14.1	12q14.2	0.0192308	0	0.0192308	-0.0177854	0.0562469	0.562743	1	NA	NA	MON2, C12orf61, MIRLET7I, PPM1H, snoU13.ENSG00000238475.1, LDHAL6CP, AVPR1A, DPY19L2, TMEM5, SRGAP1, C12orf66
653	12	12q14.2	12q14.2	0.0192308	0.0116279	0.00760286	-0.0347854	0.0499912	1	1	NA	NA	RPS11P6, C12orf56
654	12	12q14.2	12q14.2	0.0192308	0	0.0192308	-0.0177854	0.0562469	0.562743	1	NA	NA	snoU13.ENSG00000238440.1
655	12	12q14.2	12q14.2	0.0192308	0.0116279	0.00760286	-0.0347854	0.0499912	1	1	NA	NA	XPOT
656	12	12q14.1	12q14.3	0.0192308	0	0.0192308	-0.0177854	0.0562469	0.562743	1	NA	NA	TBK1, SNORD83, RASSF3, MIR548C, GNS, snoU13.ENSG00000238592.1, TBC1D30
657	12	12q14.3	12q14.3	0.00961538	0	0.00961538	-0.018755	0.0379858	1	1	NA	NA	RNU6ATAC42P, WIF1
658	12	12q14	12q15	0.00961538	0.0116279	-0.00201252	-0.0334377	0.0294127	1	1	NA	NA	LEMD3, MSRB3, RPSAP52, HMGA2, RNA5SP362, LLPH, TMBIM4, IRAK3, RN7SKP166, HELB, snoU13.ENSG00000238528.1, GRIP1, CAND1, DYRK2
659	12	12q14	12q15	0.0192308	0.0116279	0.00760286	-0.0347854	0.0499912	1	1	NA	NA	IFNG, IL26, IL22, MDM1
660	12	12q14	12q14	0.0192308	0.0232558	-0.00402504	-0.049418	0.0413679	1	1	NA	NA	RAP1B
661	12	12q14	12q14.3-q15	0.0192308	0.0116279	0.00760286	-0.0347854	0.0499912	1	1	NA	NA	SNORA70G, NUP107, SLC35E3, MDM2
662	12	12q14.3	12q15	0.0192308	0	0.0192308	-0.0177854	0.0562469	0.562743	1	NA	NA	CPM, CPSF6, LYZ
663	12	12q13-q15	12q15	0.0192308	0.0116279	0.00760286	-0.0347854	0.0499912	1	1	NA	NA	YEATS4, RN7SL804P, FRS2
664	12	12q15	12q14.2-q15	0.0192308	0	0.0192308	-0.0177854	0.0562469	0.562743	1	NA	NA	CCT2, LRRC10, BEST3
665	12	12q15	12q21.2	0.00961538	0	0.00961538	-0.018755	0.0379858	1	1	NA	NA	RAB3IP, MYRFL, CNOT2, KCNMB4, PTPRB, PTPRR, TSPAN8, LGR5, ZFC3H1, SNORA17.ENSG00000212461.1, THAP2, TMEM19, RAB21, TBC1D15, TPH2, TRHDE, U8.ENSG00000201809.1, ATXN7L3B, KCNC2, CAPS2, GLIPR1L1, GLIPR1L2, GLIPR1, KRR1, SNORA70.ENSG00000251893.2, RN7SL734P, PHLDA1, NAP1L1
666	12	12q21.2	12q21.2	0.0192308	0	0.0192308	-0.0177854	0.0562469	0.562743	1	NA	NA	RN7SKP172, BBS10, OSBPL8, ZDHHC17, CSRP2, E2F7
667	12	12q21.2	12q14.3	0.00961538	0	0.00961538	-0.018755	0.0379858	1	1	NA	NA	snoU13.ENSG00000238769.1, NAV3
668	12	12cen-q21	12q24.23	0.0192308	0	0.0192308	-0.0177854	0.0562469	0.562743	1	NA	NA	SYT1, MIR1252
669	12	12q24.23	12q21.31	0.0288462	0	0.0288462	-0.0139431	0.0716355	0.315843	1	NA	NA	RN7SL696P, PAWR, PPP1R12A, RNA5SP363
670	12	12q21.31	12q21	0.0192308	0	0.0192308	-0.0177854	0.0562469	0.562743	1	NA	NA	OTOGL, RN7SKP261, PTPRQ, MYF6, MYF5
671	12	12q21	12q21.31	0.00961538	0	0.00961538	-0.018755	0.0379858	1	1	NA	NA	LIN7A, MIR617, ACSS3, MIR618, MIR4699
672	12	12q21.31	12q21.31	0.0192308	0	0.0192308	-0.0177854	0.0562469	0.562743	1	NA	NA	PPFIA2, CCDC59, METTL25, TMTC2
673	12	12q21.31	12q21.31	0.00961538	0	0.00961538	-0.018755	0.0379858	1	1	NA	NA	SNORA3.ENSG00000221148.1
674	12	12q21.3	12q21.31	0.0192308	0	0.0192308	-0.0177854	0.0562469	0.562743	1	NA	NA	SLC6A15, TSPAN19, LRRIQ1, ALX1
675	12	12q21.31	12q21	0.0288462	0	0.0288462	-0.0139431	0.0716355	0.315843	1	NA	NA	RASSF9, NTS, MGAT4C
676	12	12q21.32	12q21.32	0.00961538	0	0.00961538	-0.018755	0.0379858	1	1	NA	NA	MKRN9P, C12orf50, C12orf29
677	12	12q21.32	12q21.32	0.0192308	0	0.0192308	-0.0177854	0.0562469	0.562743	1	NA	NA	CEP290
678	12	12q21.32	12q21.32	0.00961538	0	0.00961538	-0.018755	0.0379858	1	1	NA	NA	RNA5SP364
679	12	12q21.32	12q21.33	0.0192308	0	0.0192308	-0.0177854	0.0562469	0.562743	1	NA	NA	TMTC3, KITLG, DUSP6, POC1B, GALNT4, ATP2B1, LINC00936, RNA5SP365
680	12	12q21.33	12q21.33	0.0288462	0	0.0288462	-0.0139431	0.0716355	0.315843	1	NA	NA	CCER1, LINC00615
681	12	12q21	12q21	0.0288462	0.0116279	0.0172182	-0.0327495	0.067186	0.75256	1	NA	NA	EPYC
682	12	12q22	12q22	0.0288462	0	0.0288462	-0.0139431	0.0716355	0.315843	1	NA	NA	KERA, LUM, DCN, C12orf79, BTG1, CLLU1OS, CLLU1, snoU13.ENSG00000238865.1, C12orf74, PLEKHG7, EEA1, SNORD74.ENSG00000201502.1, snoU13.ENSG00000238361.1, snoU13.ENSG00000239073.1, NUDT4, UBE2N, MRPL42, RN7SL737P, SOCS2, CRADD, RN7SL630P, RN7SKP263, PLXNC1, CCDC41, RN7SL330P, RN7SL483P, MIR5700, TMCC3, KRT19P2, MIR492, NDUFA12, NR2C1, FGD6
683	12	12q22	12q22	0.0192308	0	0.0192308	-0.0177854	0.0562469	0.562743	1	NA	NA	VEZT, MIR331, MIR3685, METAP2, USP44
684	12	12q22	12q23.1	0.00961538	0	0.00961538	-0.018755	0.0379858	1	1	NA	NA	PGAM1P5, NTN4, SNRPF, CCDC38, AMDHD1, HAL, LTA4H, RN7SL88P, ELK3, CDK17, RN7SKP11, C12orf55, C12orf63, NEDD1
685	12	12q23.1|12q21	12q23.1|12q21	0.0192308	0	0.0192308	-0.0177854	0.0562469	0.562743	1	NA	NA	RMST
686	12	12q23.1|12q21	12q23.1	0.00961538	0	0.00961538	-0.018755	0.0379858	1	1	NA	NA	MIR1251, MIR135A2, MIR4495, MIR4303, SLC9A7P1, TMPO, RN7SL179P, SLC25A3, SNORA53, IKBIP, APAF1, ANKS1B, RNA5SP366, FAM71C, UHRF1BP1L, GOLGA2B, RN7SL176P, ACTR6, DEPDC4, SCYL2, SLC17A8, snoU13.ENSG00000238748.1, NR1H4, GAS2L3, ANO4, SLC5A8
687	12	12q23	12q23.2	0.0192308	0	0.0192308	-0.0177854	0.0562469	0.562743	1	NA	NA	UTP20, snoU13.ENSG00000238800.1, ARL1, RNA5SP367, SPIC, MYBPC1, CHPT1, SYCP3, GNPTAB, RNA5SP368, snoU13.ENSG00000238940.1, RNA5SP369, DRAM1
688	12	12q23.2	12q24.1	0.00961538	0	0.00961538	-0.018755	0.0379858	1	1	NA	NA	CCDC53, NUP37, PARPBP, PMCH, RN7SL793P, IGF1, LINC00485, PAH, ASCL1, C12orf42, STAB2, U8.ENSG00000212594.1, snoU13.ENSG00000238914.1, NT5DC3, HSP90B1, MIR3652, C12orf73, TDG, GLT8D2, HCFC2, NFYB, RNA5SP370, TXNRD1, EID3, CHST11, MIR3922, SLC41A2, C12orf45, ALDH1L2, KIAA1033, APPL2
689	12	12q23.3	12q23.3	0.0192308	0	0.0192308	-0.0177854	0.0562469	0.562743	1	NA	NA	C12orf75
690	12	12q23.3	12q24	0.00961538	0	0.00961538	-0.018755	0.0379858	1	1	NA	NA	NUAK1, CKAP4, TCP11L2, POLR3B, RFX4, RIC8B, C12orf23, MTERFD3, CRY1, BTBD11, SNORD74.ENSG00000200897.1, RNA5SP371, PWP1, PRDM4, ASCL4, WSCD2, CMKLR1, FICD, SART3, ISCU, TMEM119, SELPLG, CORO1C, SNORA40.ENSG00000264043.2, SSH1, MIR619, DAO, SVOP, USP30, RNA5SP372, ALKBH2, UNG, ACACB, FOXN4, MYO1H, KCTD10, UBE3B, MMAB, MVK, RN7SKP250, FAM222A, TRPV4, MIR4497, GLTP, RN7SL441P, TCHP, GIT2, ANKRD13A, …
691	12	12q24.12	12q24.12	0.0192308	0	0.0192308	-0.0177854	0.0562469	0.562743	1	NA	NA	ACAD10
692	12	12q24.2	12q24.13	0.0192308	0	0.0192308	-0.0177854	0.0562469	0.562743	1	NA	NA	ALDH2, MAPKAPK5, ADAM1A
693	12	12q24.13	12q24.13	0.00961538	0	0.00961538	-0.018755	0.0379858	1	1	NA	NA	TMEM116, ERP29, NAA25, MIR3657, TRAFD1, HECTD4, RN7SKP71, PTPN11, RPL6, RPH3A, OAS1, OAS3, OAS2, DTX1, RASAL1, CCDC42B, DDX54, C12orf52, IQCD, TPCN1, SLC24A6
694	12	12q24.13	12q24.13	0.0192308	0	0.0192308	-0.0177854	0.0562469	0.562743	1	NA	NA	PLBD2
695	12	12q24.13	12q24.22	0.00961538	0	0.00961538	-0.018755	0.0379858	1	1	NA	NA	SDS, SDSL, LHX5, RBM19, TBX5, RN7SKP216, TBX3, SNORA27.ENSG00000252459.1, RN7SL865P, SNORD56.ENSG00000200112.1, MED13L, MIR620, LINC00173, MAP1LC3B2, C12orf49, RNFT2
696	12	12q24.22	12q24.23	0.0192308	0	0.0192308	-0.0177854	0.0562469	0.562743	1	NA	NA	HRK, FBXW8, TESC, FBXO21, NOS1, KSR2, RFC5, WSB2, VSIG10, PEBP1, TAOK3, SUDS3, RNA5SP374, SNORA38.ENSG00000201042.1, SRRM4, RN7SL508P, HSPB8, CCDC60, TMEM233, RN7SKP197, PRKAB1, CIT, MIR1178
697	12	12q24.23	12q24.31	0.00961538	0	0.00961538	-0.018755	0.0379858	1	1	NA	NA	CCDC64, snoU13.ENSG00000272464.1, RAB35, GCN1L1, MIR4498, RPLP0, PXN, SIRT4, PLA2G1B, MSI1, RPS27P25, COX6A1, GATC, TRIAP1, SRSF9, DYNLL1, COQ5, RNF10, POP5, CABP1, MLEC, UNC119B, MIR4700, ACADS, SPPL3, HNF1A, C12orf43, OASL, SNORA70.ENSG00000201945.1, P2RX7, P2RX4, CAMKK2, ANAPC5, RNF34, KDM2B, ORAI1, MORN3, TMEM120B, RHOF, SETD1B, HPD, PSMD9, WDR66, BCL7A, MLXIP, LRRC43, IL31, B3GNT4, DIABLO, V…
698	12	12q24.31	12q24.31	0.0192308	0	0.0192308	-0.0177854	0.0562469	0.562743	1	NA	NA	CCDC62, HIP1R, VPS37B, ABCB9, ARL6IP4, OGFOD2, PITPNM2, MIR4304, RN7SL133P, MPHOSPH9, C12orf65, CDK2AP1, RNA5SP375, SBNO1, SETD8, RILPL2, SNRNP35, RILPL1, MIR3908, TMED2, DDX55, SNORA9.ENSG00000206897.1, EIF2B1, ATP6V0A2, GTF2H3, TCTN2, DNAH10, CCDC92, DNAH10OS, ZNF664, FAM101A
699	12	12q24	12q24	0.0192308	0	0.0192308	-0.0177854	0.0562469	0.562743	1	NA	NA	NCOR2
700	12	12q24.31	12q24.31	0.0288462	0	0.0288462	-0.0139431	0.0716355	0.315843	1	NA	NA	SCARB1
701	12	12q24.3	12q24.31	0.0192308	0	0.0192308	-0.0177854	0.0562469	0.562743	1	NA	NA	UBC, MIR5188, RPL22P19, DHX37, BRI3BP
702	12	12q24.31	12q24.33	0.00961538	0	0.00961538	-0.018755	0.0379858	1	1	NA	NA	AACS, TMEM132B, LINC00939, LINC00943, LINC00944, LINC00507, LINC00508, MIR4419B, MIR3612, TMEM132C, snoU13.ENSG00000238895.1, SLC15A4, GLT1D1, TMEM132D, FZD10, PIWIL1, RIMBP2, RN7SL534P, STX2, snoU13.ENSG00000238822.1, RAN, GPR133, RNA5SP376
703	12	12q24.33	12q24.33	0.0192308	0	0.0192308	-0.0177854	0.0562469	0.562743	1	NA	NA	RNA5SP377, SFSWAP, RNA5SP378, MMP17, ULK1, PUS1, EP400, SNORA49, EP400NL, DDX51, GALNT9, NOC4L, MUC8, FBRSL1, ANHX, ANKLE2, CHFR, GOLGA3, LRCOL1, P2RX2, PGAM5, POLE, PXMP2, RNA5SP379, RNU4ATAC12P, ZNF10, ZNF140, ZNF268, ZNF26, ZNF605, ZNF84, ZNF891
704	13	13q11	13q11	0.0192308	0	0.0192308	-0.0177854	0.0562469	0.562743	1	NA	NA	LINC00349, LINC00387, LINC00388
705	13	13q12.11	13q12.11	0.00961538	0	0.00961538	-0.018755	0.0379858	1	1	NA	NA	PHF2P2, LINC00442, RNA5SP24, TUBA3C, LINC00421, TPTE2, LINC00350, MPHOSPH8, PSPC1, RN7SL166P, ZMYM5, snoU13.ENSG00000238665.1, ZMYM2, GJA3, LINC00556, GJB2, CRYL1, GJB6, MIR4499, IFT88, IL17D, N6AMT2
706	13	13q11	13q11	0.00961538	0	0.00961538	-0.018755	0.0379858	1	1	NA	NA	XPO4
707	13	13q12.11	13q12.12	0.00961538	0	0.00961538	-0.018755	0.0379858	1	1	NA	NA	HNRNPA1P30, LATS2, snoU13.ENSG00000238893.1, RN7SL80P, SAP18, SNORD27.ENSG00000252128.1, SKA3, MRP63, ESRRAP2, MIPEPP3, RNA5SP25, ZDHHC20, MICU2, snoU13.ENSG00000238878.1, FGF9, RN7SL766P, LINC00424, LINC00621, SNORD36.ENSG00000253094.1, RNY3P4, LINC00362
708	13	13q12	13q12	0.0192308	0	0.0192308	-0.0177854	0.0562469	0.562743	1	NA	NA	SGCG
709	13	13q12	13q12.2	0.00961538	0	0.00961538	-0.018755	0.0379858	1	1	NA	NA	SACS, LINC00327, LINC00352, ANKRD20A19P, C1QTNF9B, MIPEP, SPATA13, TNFRSF19, MIR2276, C1QTNF9, LINC00566, PARP4, TPTE2P6, ATP12A, RNY1P7, RNF17, CENPJ, TPTE2P1, LSP1.ENSG00000269099.1, PABPC3, AMER2, MTMR6, NUPL1, ATP8A2, RN7SL289P, RN7SL741P, RNY1P3, SHISA2, LINC00415, RNF6, CDK8, WASF3, GPR12, USP12, RPL21, SNORD102, SNORA27.ENSG00000207051.1, RASL11A, RNY1P1, GTF3A, MTIF3, LNX2, POLR1D, GSX1
710	13	13q12	13q12.2	0.00961538	0.0116279	-0.00201252	-0.0334377	0.0294127	1	1	NA	NA	ATP5EP2, CDX2, LINC00543, PDX1, URAD, RN7SL272P, FLT3, PAN3
711	13	13q12	13q14.11	0.00961538	0	0.00961538	-0.018755	0.0379858	1	1	NA	NA	FLT1, POMP, SLC46A3, MTUS2, SLC7A1, UBL3, LINC00297, LINC00572, LINC00544, LINC00365, KATNAL1, LINC00427, LINC00426, HMGB1, USPL1, ALOX5AP, LINC00398, LINC00545, MEDAG, TEX26, HSPH1, B3GALTL, RXFP2, EEF1DP3, FRY, ZAR1L, BRCA2, N4BP2L1, SNORA16.ENSG00000212293.1, N4BP2L2, PDS5B, RNY1P4, LINC00423, KL, STARD13, RFC3, SNORA25.ENSG00000199196.1, LINC00457, NBEA, MAB21L1, LINC00445, DCLK1, SOHLH2, CCD…
712	13	13q14.11	13q14.11	0.0192308	0	0.0192308	-0.0177854	0.0562469	0.562743	1	NA	NA	LINC00284
713	13	13q14.11	13q22	0.00961538	0	0.00961538	-0.018755	0.0379858	1	1	NA	NA	SMIM2, SERP2, TSC22D1, snoU13.ENSG00000238932.1, LINC00330, NUFIP1, KIAA1704, RN7SL49P, RN7SKP3, GTF2F2, X7SK.ENSG00000271818.1, KCTD4, SNORA31.ENSG00000253051.1, TPT1, SNORA31.ENSG00000199477.1, SLC25A30, COG3, FAM194B, RNA5SP27, SPERT, SIAH3, ZC3H13, CPB2, LCP1, RN7SL288P, LRRC63, snoU13.ENSG00000238483.1, RN7SKP5, LINC00563, KIAA0226L, LRCH1, ESD, HTR2A, RN7SL700P, LINC00444, LINC00562, SUCLA2…
714	13	13q22.2	13q22.2	0.00961538	0.0116279	-0.00201252	-0.0334377	0.0294127	1	1	NA	NA	UCHL3
715	13	13q22.2	13q31.2	0.00961538	0	0.00961538	-0.018755	0.0379858	1	1	NA	NA	LMO7, C13orf45, LINC00561, RN7SL571P, KCTD12, IRG1, CLN5, FBXL3, MYCBP2, SCEL, RNY3P7, MIR3665, SLAIN1, EDNRB, RN7SL810P, LINC00446, RNY3P3, POU4F1, RNF219, LINC00331, RBM26, RNA5SP33, NDFIP2, SPRY2, LINC00564, PTMAP5, SLITRK1, LINC00333, LINC00351, SLITRK6, MIR4500HG, MIR4500, SLITRK5, LINC00433, LINC00560, LINC00440, LINC00353
716	13	13q31.3	13q31.3	0.00961538	0	0.00961538	-0.018755	0.0379858	1	1	NA	NA	SNORD38.ENSG00000200733.1, LINC00559, RNA5SP34, MIR622, LINC00410, LINC00379, MIR17HG
717	13	13q32	13q32	0.0288462	0	0.0288462	-0.0139431	0.0716355	0.315843	1	NA	NA	GPC5
718	13	13q32	13q32	0.00961538	0	0.00961538	-0.018755	0.0379858	1	1	NA	NA	RNU4ATAC3P, MIR548AS
719	13	13q32	13q32	0.0192308	0.0116279	0.00760286	-0.0347854	0.0499912	1	1	NA	NA	GPC6
720	13	11q13	13q33	0.00961538	0	0.00961538	-0.018755	0.0379858	1	1	NA	NA	SNORD22, RNA5SP35, DCT, TGDS, GPR180, RNA5SP36, RN7SL585P, LINC00391, SOX21, LINC00557, ABCC4, snoU13.ENSG00000238463.1, RNY3P8, RNY4P27, CLDN10, DZIP1, DNAJC3, snR65.ENSG00000251901.1, UGGT2, HS6ST3, RN7SL164P, LINC00359, RN7SKP7, SNORD112.ENSG00000252154.1, OXGR1, snoU13.ENSG00000238522.1, MBNL2, RNA5SP37, RAP2A, snoU13.ENSG00000238407.1, IPO5, FARP1, RNF113B, RN7SKP8, MIR3170, STK24, RN7SL60P,…
721	13	13q33.2|13q34	13q33.2	0.00961538	0	0.00961538	-0.018755	0.0379858	1	1	NA	NA	DAOA, LINC00343, LINC00344
722	13	13q33.2	13q34	0.00961538	0	0.00961538	-0.018755	0.0379858	1	1	NA	NA	SNORA25.ENSG00000252550.1, RNA5SP38, LINC00460, EFNB2, ARGLU1, LINC00551, LINC00443, FAM155A, SNORD31, MIR1267, LIG4, ABHD13, TNFSF13B, RNA5SP39, MYO16, LINC00676, IRS2, RN7SKP10, RN7SL783P, COL4A1, COL4A2, snoU13.ENSG00000238629.1, RAB20, CARKD, CARS2, ING1, LINC00567, LINC00346, ANKRD10, ARHGEF7, TEX29, LINC00354, SNORD44, SOX1, LINC00403, LINC00404, SPACA7, TUBGCP3, C13orf35, ATP11A, MCF2L, F7…
723	13	13q34	13q34	0.0288462	0	0.0288462	-0.0139431	0.0716355	0.315843	1	NA	NA	TFDP1, ATP4B, GAS6, GRK1
724	13	13q34	13q34	0.0288462	0	0.0288462	-0.0139431	0.0716355	0.315843	1	NA	NA	LINC00454
725	13	13q34	13q34	0.0288462	0	0.0288462	-0.0139431	0.0716355	0.315843	1	NA	NA	TMEM255B
726	13	13q34	13q34	0.0288462	0	0.0288462	-0.0139431	0.0716355	0.315843	1	NA	NA	LINC00453, LINC00452, LINC00565, RASA3, CDC16, CHAMP1, MIR4502, MIR548AR, UPF3A
727	14	14q11.2	14q11.2	0.00961538	0	0.00961538	-0.018755	0.0379858	1	1	NA	NA	LINC00516, MED15P1, MED15P6, OR11H12, OR4K13, OR4K14, OR4K15, OR4K1, OR4K2, OR4K5, OR4M1, OR4N2, OR4Q2, OR4Q3, POTEG, POTEM, snoU13.ENSG00000238492.1, OR4L1, RNA5SP380, OR4K17, OR4N5, RNA5SP381, OR11G2, OR11H6, OR11H7, OR11H4, TTC5, CCNB1IP1, SNORA79.ENSG00000222489.1, SNORD126, RPPH1, PARP2, TEP1, RNA5SP382, KLHL33, OSGEP, APEX1, TMEM55B, PNP, RNASE10, RNASE9, RNASE11, RNASE12, OR6S1, ANG, RNASE…
728	14	14q11	14q12	0.00961538	0	0.00961538	-0.018755	0.0379858	1	1	NA	NA	RPGRIP1, SUPT16H, CHD8, SNORD9, SNORD8, RN7SL650P, RAB2B, TOX4, METTL3, SALL2, OR10G3, OR10G2, ABHD4, DAD1, OR4E2, OR6J1, TRAC, TRAJ10, TRAJ11, TRAJ12, TRAJ13, TRAJ14, TRAJ16, TRAJ17, TRAJ18, TRAJ19, TRAJ1, TRAJ20, TRAJ21, TRAJ22, TRAJ23, TRAJ24, TRAJ25, TRAJ26, TRAJ27, TRAJ28, TRAJ29, TRAJ2, TRAJ30, TRAJ31, TRAJ32, TRAJ33, TRAJ34, TRAJ35, TRAJ36, TRAJ37, TRAJ38, TRAJ39, TRAJ3, TRAJ40, TRAJ41, TR…
729	14	14q12	14q12	0	0.0116279	-0.0116279	-0.0449069	0.0216511	0.923984	1	NA	NA	LINC00645
730	14	14q12	14q13.1	0	0	0	0	0	NA	NA	NA	NA	BNIP3P1, C14orf23, FOXG1, PRKD1, G2E3, SCFD1, COCH, STRN3, MIR624, AP4S1, HECTD1, HEATR5A, DTD2, GPR33, NUBPL, ARHGAP5, AKAP6, RN7SL660P, NPAS3, EGLN3, SPTSSA, EAPP
731	14	14q13.1	14q13.1	0	0	0	0	0	NA	NA	NA	NA	SNX6
732	14	14q12	14q22.1	0	0	0	0	0	NA	NA	NA	NA	CFL2, BAZ1A, SRP54, FAM177A1, PPP2R3C, KIAA0391, PSMA6, NFKBIA, INSM2, RALGAPA1, SNORA31.ENSG00000253059.1, snoU13.ENSG00000238718.1, BRMS1L, LINC00609, PTCSC3, RN7SKP21, MBIP, DPPA3P2, SFTA3, RN7SKP257, PAX9, SLC25A21, MIR4503, MIPOL1, FOXA1, TTC6, SNORA42.ENSG00000200385.1, LINC00517, SSTR1, CLEC14A, LINC00639, SEC23A, GEMIN2, TRAPPC6B, PNN, MIA2, CTAGE5, FBXO33, SNORA31.ENSG00000251858.1, LRFN…
733	14	14q22.3	14q22.3	0	0	0	0	0	NA	NA	NA	NA	LINC00520, RPL13AP3, PELI2, TMEM260
734	14	14q22.3	14q24.1	0	0	0	0	0	NA	NA	NA	NA	OTX2, RN7SL461P, EXOC5, AP5M1, NAA30, C14orf105, SLC35F4, RN7SKP99, C14orf37, RN7SL598P, ACTR10, PSMA3, ARID4A, TOMM20L, TIMM9, KIAA0586, DACT1, DAAM1, GPR135, L3HYPDH, JKAMP, CCDC175, RTN1, MIR5586, LRRC9, PCNXL4, DHRS7, PPM1A, C14orf39, SIX6, U3.ENSG00000253014.1, SIX1, SIX4, MNAT1, TRMT5, SLC38A6, PRKCH, SNORD112.ENSG00000252380.1, TMEM30B, HIF1A, SNAPC1, SYT16, LINC00643, LINC00644, KCNH5, RH…
735	14	14q24.1	14q23-q24.2	0	0	0	0	0	NA	NA	NA	NA	PLEKHH1, PIGH, ARG2, VTI1B, RDH11, RDH12, RN7SL369P, ZFYVE26, U3.ENSG00000252792.1, RN7SL213P, RAD51B
736	14	14q24.1	14q24.1	0	0	0	0	0	NA	NA	NA	NA	RN7SL706P, RN7SL108P, ZFP36L1, RN7SL224P, ACTN1, DCAF5, EXD2, GALNT16, ERH
737	14	14q24.1	14q24.1	0	0	0	0	0	NA	NA	NA	NA	SLC39A9, PLEKHD1
738	14	14q24.1	14q24.3	0	0	0	0	0	NA	NA	NA	NA	CCDC177.ENSG00000255994.1, CCDC177.ENSG00000267909.1, KIAA0247, SRSF5, SLC10A1, SNORA11.ENSG00000221060.1, SMOC1, SLC8A3, ADAM21P1, COX16, SYNJ2BP, ADAM21, ADAM20P1, ADAM20, MED6, RN7SL77P, TTC9, MAP3K9, PCNX, SIPA1L1, SNORD56B, RN7SL683P, RGS6, DPF3, snoU13.ENSG00000238972.1, DCAF4, ZFYVE1, RN7SL586P, RBM25, PSEN1, PAPLN, NUMB, HEATR4, C14orf169, ACOT1, ACOT2, ACOT4, ACOT6, DNAL1, PNMA1, ELMSAN1…
739	14	14q24.3	14q24	0.00961538	0	0.00961538	-0.018755	0.0379858	1	1	NA	NA	IFT43, TGFB3
740	14	14q24.3	14q31	0	0	0	0	0	NA	NA	NA	NA	GPATCH2L, ESRRB, RN7SL747P, VASH1, ANGEL1, C14orf166B, RN7SKP17, RN7SL356P, IRF2BPL, KIAA1737, TMEM63C, ZDHHC22, SNORA32.ENSG00000201384.1, MIR1260A, NGB, POMT2, GSTZ1, TMED8, RN7SL137P, SAMD15, NOXRED1, FKSG61, VIPAS39, AHSA1, SNORA46.ENSG00000212371.1, ISM2, SPTLC2, RN7SL587P, ALKBH1, SLIRP, SNW1, C14orf178, ADCK1, RNA5SP388, NRXN3, DIO2, CEP128, TSHR
741	14	14q31.1	14q31.1	0	0	0	0	0	NA	NA	NA	NA	GTF2A1, SNORA79.ENSG00000221303.1
742	14	14q31.1	14q31.3	0	0	0	0	0	NA	NA	NA	NA	STON2, SEL1L, snoU13.ENSG00000238978.1, RNU6ATAC28P, RNU3P3
743	14	14q31.3	14q24-q32	0.00961538	0	0.00961538	-0.018755	0.0379858	1	1	NA	NA	LINC00911
744	14	14q24-q32	14q24-q32	0.00961538	0	0.00961538	-0.018755	0.0379858	1	1	NA	NA	FLRT2
745	14	14q31	14q32.12	0	0	0	0	0	NA	NA	NA	NA	GALC, GPR65, KCNK10, SPATA7, PTPN21, ZC3H14, EML5, TTC8, FOXN3, RN7SKP107, RN7SKP255, EFCAB11, TDP1, KCNK13, PSMC1, NRDE2, CALM1, LINC00642
746	14	14q32.11	14q32.11	0	0.0116279	-0.0116279	-0.0449069	0.0216511	0.923984	1	NA	NA	TTC7B
747	14	14q31-q32.1	14q32.13	0	0	0	0	0	NA	NA	NA	NA	RPS6KA5, C14orf159, SNORA11B, RN7SL506P, GPR68, CCDC88C, SMEK1, CATSPERB, U3.ENSG00000200042.1, TC2N, FBLN5, TRIP11, ATXN3, NDUFB1, CPSF2, SLC24A4, RIN3, LGMN, GOLGA5, CHGA, ITPK1, MOAP1, TMEM251, C14orf142, UBR7, BTBD7, UNC79, COX8C, PRIMA1, FAM181A, ASB2, MIR4506, LINC00521, OTUB2, DDX24, IFI27L1, IFI27, IFI27L2, PPP4R4, SERPINA10, SERPINA6, SERPINA1, SERPINA11, SERPINA9, SERPINA12, SERPINA4, S…
748	14	14q32.1	14q32.1	0	0	0	0	0	NA	NA	NA	NA	TCL6
749	14	14q32.1	14q32.33	0	0	0	0	0	NA	NA	NA	NA	TCL1B, TCL1A, LINC00617, C14orf132, BDKRB2, BDKRB1, DKFZP434O1614, ATG2B, snoU13.ENSG00000238776.1, GSKIP, AK7, PAPOLA, RN7SKP108, VRK1, LINC00618, RN7SL710P, C14orf64, RN7SL714P, C14orf177, BCL11B, SETD3, U6.ENSG00000272439.1, CCNK, CCDC85C, HHIPL1, CYP46A1, EML1, EVL, MIR151B, MIR342, DEGS2, YY1, SLC25A29, MIR345, RN7SL523P, SLC25A47, WARS, WDR25, RN7SKP92, BEGAIN, LINC00523, DLK1, MEG3, MIR239…
750	15	15q11.1	15q12	0.00961538	0.0232558	-0.0136404	-0.0612267	0.0339459	0.868041	1	NA	NA	CHEK2P2, CT60, CYFIP1, DKFZP547L112, GOLGA6L1, GOLGA6L2, GOLGA6L6, GOLGA8DP, GOLGA8EP, GOLGA8I, GOLGA8S, HERC2P2, HERC2P3, MIR1268A, NBEAP1, NIPA1, NIPA2, OR4M2, OR4N4, POTEB2, POTEB, RN7SL106P, RN7SL400P, RN7SL495P, RN7SL536P, RN7SL545P, RN7SL584P, RN7SL759P, TUBGCP5, WHAMMP3, snoU13.ENSG00000238960.1, snoU13.ENSG00000239083.1, MIR4508, MKRN3, MAGEL2, NDN, PWRN1, PWRN2, NPAP1, SNRPN, snoU13.ENSG…
751	15	15q12	15q12	0.00961538	0.0348837	-0.0252683	-0.0789665	0.0284298	0.48393	1	NA	NA	SNHG14
752	15	15q11.2	15q11.2	0.00961538	0.0232558	-0.0136404	-0.0612267	0.0339459	0.868041	1	NA	NA	SNORD64.ENSG00000270704.2, SNORD108, SNORD109A, SNORD115.ENSG00000212428.1, SNORD109B, UBE3A, ATP10A, RNA5SP390, MIR4715, SNORA48.ENSG00000212604.1, LINC00929
753	15	15q12	15q12	0.00961538	0.0348837	-0.0252683	-0.0789665	0.0284298	0.48393	1	NA	NA	GABRB3
754	15	15q12	15q	0.00961538	0.0232558	-0.0136404	-0.0612267	0.0339459	0.868041	1	NA	NA	GABRA5, GABRG3, RNA5SP391, OCA2
755	15	15q13	15q13.2-q13.3	0.0192308	0.0232558	-0.00402504	-0.049418	0.0413679	1	1	NA	NA	HERC2, APBA2, ARHGAP11B, CHRFAM7A, FAM189A1, GOLGA6L7P, GOLGA8F, GOLGA8G, GOLGA8H, GOLGA8J, GOLGA8M, GOLGA8Q, GOLGA8R, GOLGA8T, HERC2P9, NDNL2, RN7SL196P, RN7SL238P, RN7SL469P, RN7SL628P, RN7SL673P, RN7SL719P, RN7SL796P, RN7SL829P, RN7SL82P, TJP1, U8.ENSG00000207430.1, U8.ENSG00000207432.1, U8.ENSG00000238519.1, U8.ENSG00000252602.1, ULK4P2, ULK4P3, WHAMMP2, snoZ278
756	15	15q13.2-q13.3	15q13.3	0.0192308	0.0232558	-0.00402504	-0.049418	0.0413679	1	1	NA	NA	FAN1, MTMR10, TRPM1, MIR211, KLF13, OTUD7A, ARHGAP11A, CHRNA7, GOLGA8K, GOLGA8N, GOLGA8O, RN7SL185P, RN7SL286P, RN7SL539P, SNORA18.ENSG00000206849.1, U8.ENSG00000206987.1, ULK4P1
757	15	15q13-q14	15q15.1	0.0192308	0.0232558	-0.00402504	-0.049418	0.0413679	1	1	NA	NA	SCG5, GREM1, FMN1, snoU13.ENSG00000238342.1, SNORD77.ENSG00000212415.1, TMCO5B, RYR3, AVEN, CHRM5, EMC7, PGBD4, KATNBL1, EMC4, SLC12A6, NOP10, NUTM1, LPCAT4, GOLGA8A, GOLGA8B, SNORA18.ENSG00000252425.1, GJD2, ACTC1, AQR, ZNF770, ANP32AP1, DPH6, MIR3942, MIR4510, C15orf41, CSNK1A1P1, U3.ENSG00000212511.1, MEIS2, TMCO5A, SPRED1, FAM98B, RASGRP1, C15orf53, C15orf54, THBS1, FSIP1, GPR176, EIF2AK4, sn…
758	15	15q15.1	15q15.1	0.0192308	0.0232558	-0.00402504	-0.049418	0.0413679	1	1	NA	NA	INO80
759	15	15q15.1	15q21.2	0.0192308	0.0232558	-0.00402504	-0.049418	0.0413679	1	1	NA	NA	EXD1, RN7SL497P, CHP1, OIP5, NUSAP1, NDUFAF1, RTF1, ITPKA, LTK, RPAP1, TYRO3, MGA, MIR626, MAPKBP1, JMJD7, PLA2G4B, RNA5SP393, SPTBN5, MIR4310, EHD4, PLA2G4E, PLA2G4D, PLA2G4F, VPS39, MIR627, TMEM87A, GANC, CAPN3, ZNF106, SNAP23, LRRC57, HAUS2, STARD9, snoU13.ENSG00000239025.1, CDAN1, TTBK2, UBR1, EPB42, TMEM62, CCNDBP1, TGM5, TGM7, LCMT2, ADAL, ZSCAN29, TUBGCP4, RN7SL487P, TP53BP1, MAP1A, PPIP5K…
760	15	15q21	15q21	0.0288462	0.0232558	0.00559034	-0.0452702	0.0564509	1	1	NA	NA	MYO5C
761	15	15q21	15q23	0.0192308	0.0232558	-0.00402504	-0.049418	0.0413679	1	1	NA	NA	MIR1266, MYO5A, ARPP19, FAM214A, ONECUT1, WDR72, UNC13C, RSL24D1, RAB27A, PIGB, CCPG1, MIR628, C15orf65, DYX1C1, PYGO1, PRTG, NEDD4, snoU13.ENSG00000238513.1, RN7SL568P, RFX7, TEX9, MNS1, ZNF280D, TCF12, snoU13.ENSG00000239035.1, LINC00926, CGNL1, GCOM1, MYZAP, POLR2M, ALDH1A2, AQP9, LIPC, ADAM10, snoU13.ENSG00000239100.1, RN7SKP95, U3.ENSG00000200318.1, FAM63B, RNF111, SLTM, CCNB2, MYO1E, C15ORF…
762	15	15q22-q24	15q22-q24	0.0288462	0.0232558	0.00559034	-0.0452702	0.0564509	1	1	NA	NA	UACA
763	15	15q23	15q23	0.0192308	0.0232558	-0.00402504	-0.049418	0.0413679	1	1	NA	NA	RPL29P30, LARP6, LRRC49, THAP10
764	15	15q23	15q23	0.0288462	0.0232558	0.00559034	-0.0452702	0.0564509	1	1	NA	NA	THSD4
765	15	15q23	15q24.1	0.0192308	0.0232558	-0.00402504	-0.049418	0.0413679	1	1	NA	NA	CT62, NR2E3, MYO9A, RNA5SP399, SENP8, GRAMD2, PKM, PARP6, CELF6, HEXA, TMEM202, ARIH1, MIR630, GOLGA6B, RN7SL485P, RN7SL853P, HIGD2B, BBS4, ADPGK, NEO1, HCN4, C15orf60, NPTN, CD276, C15orf59, TBC1D21
766	15	15q22	15q22	0.0192308	0.0232558	-0.00402504	-0.049418	0.0413679	1	1	NA	NA	LOXL1
767	15	15q24-q25	15q24-q25	0.0192308	0.0232558	-0.00402504	-0.049418	0.0413679	1	1	NA	NA	STOML1
768	15	15q22	15q22	0.0288462	0.0232558	0.00559034	-0.0452702	0.0564509	1	1	NA	NA	PML
769	15	15q24.1	15q24.1	0.0192308	0.0232558	-0.00402504	-0.049418	0.0413679	1	1	NA	NA	GOLGA6A, ISLR2, RN7SL429P, ISLR, STRA6
770	15	15q24.1	15q24.2	0.0192308	0.0348837	-0.015653	-0.0731841	0.0418782	0.829259	1	NA	NA	CCDC33, CYP11A1, SEMA7A, UBL7, SNORD77.ENSG00000212279.2, ARID3B, CLK3, EDC3, CYP1A1, CYP1A2, CSK, MIR4513, LMAN1L, CPLX3, ULK3, SCAMP2, MPI, FAM219B, COX5A, RPP25, SCAMP5, PPCDC, SCARNA20.ENSG00000252722.1, C15orf39, DNM1P34, GOLGA6C, GOLGA6D, RN7SL327P, RN7SL489P, ANP32BP1, COMMD4, NEIL1, MAN2C1, MIR631
771	15	15q24.2	15q26.1	0.0192308	0.0232558	-0.00402504	-0.049418	0.0413679	1	1	NA	NA	SIN3A, PTPN9, SNUPN, IMP3, SNX33, CSPG4, ODF3L1, DNM1P35, MIR4313, RN7SL319P, SNORD112.ENSG00000252372.1, UBE2Q2, RN7SL510P, FBXO22, NRG4, C15orf27, ETFA, ISL2, SCAPER, MIR3713, RN7SKP217, RCN2, RN7SL278P, PSTPIP1, TSPAN3, PEAK1, HMG20A, LINGO1, RN7SL214P, TBC1D2B, MIR1827, SH2D7, SNORA63.ENSG00000199633.1, CIB2, IDH3A, ACSBG1, DNAJA4, WDR61, CRABP1, IREB2, HYKK, PSMA4, CHRNA5, CHRNA3, CHRNB4, AD…
772	15	15q26.2	15q26.2	0.0192308	0.0232558	-0.00402504	-0.049418	0.0413679	1	1	NA	NA	MCTP2
773	15	15q26.2	16p13.3	0.0192308	0.0232558	-0.00402504	-0.049418	0.0413679	1	1	NA	NA	LINC00924, NR2F2, MIR1469, RN7SKP254, SPATA8, RN7SKP181, RN7SL677P, RNA5SP401, LINC00923, ARRDC4, FAM169B, IGF1R, MIR4714, PGPEP1L, SYNM, TTC23, LRRC28, MEF2A, DKFZP779J2370, LYSMD4, DNM1P46, RN7SL484P, ADAMTS17, RNA5SP402, CERS3, SPATA41, LINS, ASB7, ALDH1A3, LRRK1, CHSY1, VIMP, SNRPA1, PCSK6, DDX11L9, DNM1P47, FAM138E, OR4F13P, OR4F15, OR4F4, OR4F6, RN7SL209P, TARSL2, TM2D3, WASH3P, snoU13.ENSG…
774	16	16p13.3	16p13.3	0.0288462	0	0.0288462	-0.0139431	0.0716355	0.315843	1	NA	NA	ARHGDIG, AXIN1, C16orf11, CAPN15, DDX11L10, DECR2, HBA1, HBA2, HBM, HBQ1, HBZ, ITFG3, LUC7L, MIR3176, MIR5587, MPG, MRPL28, NHLRC4, NME4, NPRL3, PDIA2, PIGQ, POLR3K, RAB11FIP3, RAB40C, RGS11, RHBDF1, SNRNP25, TMEM8A, WASH4P, WASIR2, C16orf13, FAM195A, WDR90, WFIKKN1, RHOT2, JMJD8, RHBDL1, STUB1, FBXL16, WDR24, METRN, CCDC78, FAM173A, HAGHL, NARFL, CHTF18, GNG13, MIR662, MSLNL, MSLN, PRR25, RPUSD1…
775	16	16p13.3	16p13.3	0.0192308	0	0.0192308	-0.0177854	0.0562469	0.562743	1	NA	NA	SOX8, SSTR5, C1QTNF8, CACNA1H, PRSS29P, TPSAB1, TPSB2, TPSD1, TPSG1
776	16	16p13.3	16p13.3	0.0192308	0	0.0192308	-0.0177854	0.0562469	0.562743	1	NA	NA	UBE2I, BAIAP3, GNPTG, TSR3, UNKL
777	16	16p13.3	16p13.3	0.0192308	0	0.0192308	-0.0177854	0.0562469	0.562743	1	NA	NA	C16orf91, CCDC154, CLCN7, PTX4, TELO2, IFT140, TMEM204, CRAMP1L, HN1L, MAPK8IP3, MIR3177, EME2, MRPS34, NME3, NUBP2, SPSB3, HAGH, IGFALS, FAHD1, MEIOB, RN7SL367P, HS3ST6, MSRB1, RPL3L, NDUFB10, RNF151, RPS2, SNHG9, SNORA10, SNORA64.ENSG00000207405.1, TBL3, NOXO1, GFER, SYNGR3, NPW, ZNF598, RN7SL219P, SLC9A3R2, NTHL1, TSC2, MIR1225, PKD1, CASKIN1, MIR4516, RAB26, SNORD60.ENSG00000206630.1, TRAF7, …
778	16	16p13.3	16p13.3	0.0192308	0	0.0192308	-0.0177854	0.0562469	0.562743	1	NA	NA	CREBBP
779	16	16p13.3	16p13.3	0.0192308	0	0.0192308	-0.0177854	0.0562469	0.562743	1	NA	NA	ADCY9, SRL, TFAP4, GLIS2, PAM16, CORO7, VASN, DNAJA3, NMRAL1, HMOX2, CDIP1
780	16	16p13.3	16p13.3	0.0288462	0	0.0288462	-0.0139431	0.0716355	0.315843	1	NA	NA	C16orf96
781	16	16p13.3	16p13.3	0.0192308	0	0.0192308	-0.0177854	0.0562469	0.562743	1	NA	NA	UBALD1, MGRN1, RN7SL850P, NUDT16L1, ANKS3, C16orf71, ZNF500, SEPT12, SMIM22, GLYR1, ROGDI, UBN1
782	16	16p13.3	16p13.3	0.0192308	0.0116279	0.00760286	-0.0347854	0.0499912	1	1	NA	NA	PPL, SEC14L5
783	16	16p13.3	16p12.1	0.0192308	0	0.0192308	-0.0177854	0.0562469	0.562743	1	NA	NA	NAGPA, ALG1, C16orf89, FAM86A, RBFOX1, SNORA40.ENSG00000252138.1, TMEM114, METTL22, ABAT, RN7SL743P, TMEM186, PMM2, C16orf72, CARHSP1, USP7, RNA5SP403, RNA5SP404, GRIN2A, RN7SL493P, ATF7IP2, RN7SL99P, EMP2, TEKT5, NUBP1, TVP23A, CIITA, DEXI, CLEC16A, RMI2, SOCS1, TNP2, PRM3, SNORA48.ENSG00000212228.1, PRM2, PRM1, snoU13.ENSG00000238409.1, MIR548H2, snoU13.ENSG00000272310.1, RN7SL522P, LITAF, SNN,…
784	16	16p12.1	16p11.2	0.0192308	0.0116279	0.00760286	-0.0347854	0.0499912	1	1	NA	NA	C16orf82, KDM8, NSMCE1, IL4R, IL21R, GTF3C1, KIAA0556, GSG1L, XPO6, SNORA25.ENSG00000200652.1, SBK1, NPIPB6, CLN3, EIF3CL, NPIPB7, snoU13.ENSG00000238703.1, APOBR, IL27, NUPR1, CCDC101
785	16	16p12.1	16p11.2	0.0288462	0.0116279	0.0172182	-0.0327495	0.067186	0.75256	1	NA	NA	SULT1A2, SULT1A1, ATP2A1, ATXN2L, CD19, EIF3C, LAT, MIR4517, MIR4721, NFATC2IP, NPIPB8, NPIPB9, RABEP2, RRN3P2, SH2B1, SNORA43.ENSG00000252461.1, SPNS1, TUFM, snoU13.ENSG00000238352.1, snoU13.ENSG00000238684.1, snoU13.ENSG00000238699.1, SNX29P2, NPIPB11, ALDOA, ASPHD1, BOLA2B, BOLA2, C16orf54, C16orf92, CDIPT, CORO1A, DOC2A, FAM57B, GDPD3, HIRIP3, INO80E, KCTD13, KIF22, MAPK3, MAZ, MVP, PAGR1, PP…
786	16	16p11.2	16p11.2	0.0288462	0.0232558	0.00559034	-0.0452702	0.0564509	1	1	NA	NA	ZNF689, FBRS, PRR14, SRCAP, SNORA30.ENSG00000206755.1, PHKG2, C16orf93, RNF40, ZNF629, BCL7C, MIR4519, MIR762, CTF1, FBXL19, ORAI3, SETD1A, HSD3B7, STX1B, STX4, ZNF668, PRSS53, ZNF646, VKORC1, BCKDK, KAT8, PRSS8, PRSS36, FUS, C16orf98, PYCARD, PYDC1, TRIM72, ITGAM, ITGAX, ITGAD, COX6A2, ZNF843, ARMC5, TGFB1I1, SLC5A2, C16orf58
787	16	16p11.2	16p11.2	0.0288462	0.0116279	0.0172182	-0.0327495	0.067186	0.75256	1	NA	NA	AHSP, CLUHP3, ZNF720
788	16	16q11.2	16q11.2	0.0480769	0.0116279	0.036449	-0.0211173	0.0940153	0.310917	1	NA	NA	ANKRD26P1
789	16	16p11.2	16p11.2	0.0384615	0.0116279	0.0268336	-0.0271398	0.080807	0.487132	1	NA	NA	ARHGAP23P1, HERC2P4, HERC2P5, HERC2P8, LINC00273, RNA5SP406, RNA5SP407, RNA5SP408, RNA5SP409, RNA5SP410, RNA5SP413, RNA5SP415, RNA5SP416, RNA5SP417, RNA5SP418, RNA5SP419, RNA5SP420, RNA5SP421, RNA5SP422, RNA5SP423, SLC6A10P, TP53TG3B, TP53TG3C, TP53TG3D, TP53TG3, ZNF267
790	16	16q11.2	16q11.2	0.0384615	0.0116279	0.0268336	-0.0271398	0.080807	0.487132	1	NA	NA	SHCBP1, VPS35, ORC6, MYLK3, C16orf87
791	16	16q12.1	16q12.1	0.0288462	0.0116279	0.0172182	-0.0327495	0.067186	0.75256	1	NA	NA	GPT2, DNAJA2, NETO2, snoU13.ENSG00000238834.1, ITFG1, RNA5SP424, PHKB, RNA5SP425, ABCC12, ABCC11, LONP2, SIAH1, RN7SL54P, snoU13.ENSG00000239013.1, N4BP1, snoU13.ENSG00000239038.1, CBLN1, C16orf78, ZNF423, CNEP1R1, HEATR3, RNY4P3, SNORA70.ENSG00000252526.1, PAPD5, ADCY7, BRD7, snoU13.ENSG00000238544.1, SNORD112.ENSG00000252077.1, NKD1, SNX20, NOD2, CYLD, RNA5SP426, SALL1, HNRNPA1P48, RN7SKP142, C…
792	16	16q12.2	16q12.2	0.0288462	0.0116279	0.0172182	-0.0327495	0.067186	0.75256	1	NA	NA	CHD9, RNA5SP427, snoU13.ENSG00000238645.1, RBL2, AKTIP, RPGRIP1L, FTO
793	16	16q12.2	16q21	0.0288462	0.0232558	0.00559034	-0.0452702	0.0564509	1	1	NA	NA	IRX3, CRNDE, IRX5, RN7SL841P, IRX6, MMP2, LPCAT2, CAPNS2, SLC6A2, CES1P1, CES1, CES5A, GNAO1, MIR3935, AMFR, NUDT21, OGFOD1, BBS2, MT4, MT3, MT2A, MT1L, MT1E, MT1M, MT1JP, MT1A, MT1DP, MT1B, MT1F, MT1G, MT1H, MT1X, NUP93, SLC12A3, HERPUD1, CETP, NLRC5, CPNE2, FAM192A, RSPRY1, ARL2BP, PLLP, CCL22, CX3CL1, CCL17, CIAPIN1, COQ9, POLR2C, DOK4, CCDC102A, GPR114, GPR56, GPR97, CCDC135, KATNB1, KIFC3, C…
794	16	16q22.1	16q22.1	0.0480769	0.0232558	0.0248211	-0.0378109	0.0874532	0.605032	1	NA	NA	CDH8, RN7SKP76, snoU13.ENSG00000238507.1, CDH11, LINC00922, RNA5SP428, CDH5, LINC00920, BEAN1, TK2, CKLF, CMTM1, CMTM2, CMTM3, CMTM4, DYNC1LI2, CCDC79, NAE1, CA7, PDP2, CDH16, RRAD, FAM96B, CES2, CES3, CES4A, RN7SL543P
795	16	16q22.1	16q22.1	0.0480769	0.0465116	0.0015653	-0.0605921	0.0637227	1	1	NA	NA	CBFB, C16orf70
796	16	16q22.1	16q22.1	0.0480769	0.0348837	0.0131932	-0.0539464	0.0803328	0.929993	1	NA	NA	B3GNT9, FBXL8, TRADD, HSF4, NOL3, KIAA0895L, EXOC3L1, E2F4, ELMO3, MIR328, LRRC29, TMEM208, FHOD1, SLC9A5, PLEKHG4, KCTD19, RN7SKP118, LRRC36, TPPP3, ZDHHC1, HSD11B2, ATP6V0D1, AGRP, FAM65A, CTCF, RLTPR, ACD, C16orf86, ENKD1, PARD6A, GFOD2, RANBP10, TSNAXIP1, CENPT, THAP11, NUTF2, EDC4, NRN1L, PSKH1, CTRL, PSMB10, LCAT, SLC12A4, DPEP3, DPEP2, DUS2L, DDX28, NFATC3, SNORA48.ENSG00000212445.1, ESRP2…
797	16	16q22.1	16q22.1	0.0384615	0.0348837	0.00357782	-0.053571	0.0607266	1	1	NA	NA	ZFP90
798	16	16q22.1	16q22.1	0.0288462	0.0348837	-0.00603757	-0.0624596	0.0503845	1	1	NA	NA	snoU109.ENSG00000252040.1, snoU109.ENSG00000252640.1, CDH3
799	16	16q22.1	16q22.1	0.0288462	0.0465116	-0.0176655	-0.0832026	0.0478717	0.797524	1	NA	NA	CDH1
800	16	16q22.1	16q22.1	0.0288462	0.0348837	-0.00603757	-0.0624596	0.0503845	1	1	NA	NA	RNA5SP429, TANGO6
801	16	16q22.1	16q22.1	0.0384615	0.0348837	0.00357782	-0.053571	0.0607266	1	1	NA	NA	RPS2P45, HAS3, CHTF8, CIRH1A, SNTB2, VPS4A, COG8, PDF, NIP7, TMED6, TERF2, CYB5B, MIR1538, NFAT5, NQO1, snoU13.ENSG00000238683.1, NOB1, WWP2, SNORA62.ENSG00000252443.1, MIR140, CLEC18A, CLEC18C, PDPR, PDXDC2P, FKSG63, snoU13.ENSG00000238734.1, AARS, EXOSC6, RN7SL407P, RN7SL279P, DDX19B, DDX19A
802	16	16q22.1	16q22.2	0.0480769	0.0348837	0.0131932	-0.0539464	0.0803328	0.929993	1	NA	NA	ST3GAL2, FUK, COG4, SF3B3, SNORD111B, SNORD111.ENSG00000221066.1, IL34, FLJ00418, MTSS1L, VAC14, HYDIN, RNU6ATAC25P, SNORD112.ENSG00000251700.1, FTSJD1, CALB2, ZNF23, ZNF19, CHST4, TAT, MARVELD3, PHLPP2
803	16	16q22.3	16q22.3	0.0384615	0.0348837	0.00357782	-0.053571	0.0607266	1	1	NA	NA	SNORA70D, AP1G1, SNORD71, ATXN1L, ZNF821, IST1, PKD1L3, DHODH, TXNL4B, HPR, HP, DHX38, PMFBP1, ZFHX3, HCCAT5, C16orf47
804	16	16q22.3	16q23.1	0.0480769	0.0348837	0.0131932	-0.0539464	0.0803328	0.929993	1	NA	NA	CLEC18B, NPIPB15, PSMD7, GLG1, RFWD3, MLKL, FA2H, WDR59, ZNRF1, LDHD, ZFP1, CTRB1, CTRB2, BCAR1, CFDP1, SNORA76.ENSG00000252122.1, TMEM170A, CHST6, CHST5, TMEM231, GABARAPL2, ADAT1, KARS, TERF2IP, RN7SL520P
805	16	16q23.1	16q23.1	0.0576923	0.0348837	0.0228086	-0.0470742	0.0926914	0.693862	1	NA	NA	RNA5SP430
806	16	16q23.1	16q23.1	0.0480769	0.0348837	0.0131932	-0.0539464	0.0803328	0.929993	1	NA	NA	CNTNAP4, RN7SKP233, SNORD33.ENSG00000252022.1, MIR4719, MON1B, SYCE1L
807	16	16q23	16q23	0.0480769	0.0465116	0.0015653	-0.0605921	0.0637227	1	1	NA	NA	ADAMTS18
808	16	16q23.1	16q23.1	0.0576923	0.0348837	0.0228086	-0.0470742	0.0926914	0.693862	1	NA	NA	NUDT7, VAT1L
809	16	16q23	16q23	0.0576923	0.0348837	0.0228086	-0.0470742	0.0926914	0.693862	1	NA	NA	CLEC3A
810	16	16q23	16q23	0.0576923	0.0465116	0.0111807	-0.0625995	0.0849609	0.986295	1	NA	NA	WWOX
811	16	16q23	16q23	0.0480769	0.0348837	0.0131932	-0.0539464	0.0803328	0.929993	1	NA	NA	PIH1
812	16	16q23	16q24.3	0.0576923	0.0232558	0.0344365	-0.0311641	0.100037	0.415875	1	NA	NA	RNA5SP431, MAF, DYNLRB2, CDYL2, CMC2, CENPN, ATMIN, C16orf46, GCSH, PKD1L2, BCMO1, GAN, MIR4720, CMIP, PLCG2, X7SK.ENSG00000260682.2, SDR42E1, HSD17B2, MPHOSPH6, RN7SKP190, snoU13.ENSG00000238321.1, CDH13, RN7SL134P, MIR3182, HSBP1, MLYCD, OSGIN1, NECAB2, MBTPS1, RNA5SP432, SLC38A8, HSDL1, DNAAF1, ADAD2, ATP2C2, COTL1, CRISPLD2, KCNG4, KLHL36, RNA5SP433, TAF1C, TLDC1, USP10, WFDC1, ZDHHC7, KIAA05…
813	17	17p13.3	17p13.3	0.115385	0.0465116	0.068873	-0.0175851	0.155331	0.150101	1	NA	NA	ABR, C17orf97, DBIL5P, DOC2B, FAM101B, FAM57A, GEMIN4, GLOD4, MIR3183, NXN, RNMTL1, RPH3AL, TIMM22, VPS53, BHLHA9
814	17	17p13.3	17p13.3	0.115385	0.0465116	0.068873	-0.0175851	0.155331	0.150101	1	NA	NA	TUSC5, YWHAE
815	17	17p13.3	17p13.3	0.115385	0.0465116	0.068873	-0.0175851	0.155331	0.150101	1	NA	NA	CRK, MYO1C, INPP5K, PITPNA, SLC43A2, RN7SL105P, snoU13.ENSG00000238946.1, SCARF1, RILP, PRPF8, MIR22HG, TLCD2, WDR81, SERPINF2, SERPINF1, SMYD4, RPA1, RTN4RL1, DPH1, OVCA2, HIC1, MIR132, MIR212, SMG6, RN7SL624P, SRR, SNORD91A, SNORD91B, TSR1, SGSM2, MNT, METTL16, RN7SL33P, PAFAH1B1, snoU13.ENSG00000239024.1, RN7SL608P, CLUH, MIR1253, RN7SL605P, RAP1GAP2, OR1D2, OR1D5, OR1G1, OR1A2, OR1A1, OR1D4, …
816	17	17p13.3	17p13.3	0.125	0.0348837	0.0901163	0.00503773	0.175195	0.0495278	1	NA	NA	OR1E1, OR3A3, OR1E2, SPATA22
817	17	17p13.3	17p13	0.115385	0.0348837	0.0805009	-0.00274335	0.163745	0.0754075	1	NA	NA	ASPA, TRPV3, SHPK, TRPV1, CTNS, EMC6, P2RX5, TAX1BP3
818	17	17p13	17p13	0.125	0.0348837	0.0901163	0.00503773	0.175195	0.0495278	1	NA	NA	ITGAE
819	17	17p13	17p13.2	0.115385	0.0348837	0.0805009	-0.00274335	0.163745	0.0754075	1	NA	NA	GSG2, C17orf85, CAMKK1, P2RX1, ATP2A3, ZZEF1, RNA5SP434, snoU13.ENSG00000238807.1, CYB5D2, ANKFY1, UBE2G1, RN7SL774P, SPNS3, SPNS2, MYBBP1A, GGT6, SMTNL2, ALOX15, PELP1, ARRB2, MED11, CXCL16, ZMYND15, GLTPD2, TM4SF5, VMO1, PLD2, PSMB6, MINK1, RN7SL171P, RN7SL784P, CHRNE, C17orf107, GP1BA, SLC25A11, RNF167, ENO3, PFN1, SPAG7, CAMTA2, INCA1, KIF1C
820	17	17p13.2	17p13.2	0.105769	0.0348837	0.0708855	-0.0104286	0.1522	0.113506	1	NA	NA	SLC52A1
821	17	17p13.2	17p13.2	0.115385	0.0348837	0.0805009	-0.00274335	0.163745	0.0754075	1	NA	NA	ZFP3, USP6, ZNF232, ZNF594, SCIMP, RABEP1, NUP88, RPAIN, C1QBP, DHX33
822	17	17p13.2	17p13.1	0.115385	0.0348837	0.0805009	-0.00274335	0.163745	0.0754075	1	NA	NA	DERL2, MIS12, NLRP1, WSCD1, AIPL1, FAM64A, ACKR6, KIAA0753, RNA5SP435, MED31, TXNDC17, C17orf100, MIR4520B, SLC13A5, XAF1, FBXO39, TEKT1, ALOX12P2, ALOX12, C17orf49, MIR497HG, RNASEK, BCL6B, SLC16A11, SLC16A13
823	17	17p13.1	17p13	0.125	0.0348837	0.0901163	0.00503773	0.175195	0.0495278	1	NA	NA	CLEC10A, ASGR2, ASGR1, DLG4, ACADVL, DVL2, MIR324, PHF23, GABARAP, CTDNEP1, ELP5, CLDN7, SLC2A4, YBX2, EIF5A, GPS2, NEURL4
824	17	17p13.1	17p13	0.115385	0.0348837	0.0805009	-0.00274335	0.163745	0.0754075	1	NA	NA	ACAP1, KCTD11, TMEM95, TNK1, PLSCR3, NLGN2, TMEM256, SPEM1, C17orf74, FGF11, TMEM102, CHRNB1, ZBTB4, SLC35G6, POLR2A, TNFSF12, SENP3, TNFSF13, EIF4A1, SNORA48.ENSG00000209582.1, SNORA67.ENSG00000264772.2, SNORD10, CD68, FXR2, MPDU1, SOX15, SHBG, snoU13.ENSG00000251860.1, SAT2, ATP1B2, TP53, WRAP53, EFNB3, DNAH2, RPL29P2, KDM6B, CYB5D1, LSMD1, TMEM88, CHD3, SCARNA21.ENSG00000252835.1, KCNAB3, CNTR…
825	17	17p13	17p13.1	0.0961538	0.0348837	0.0612701	-0.0180099	0.14055	0.168692	1	NA	NA	RN7SL129P, CCDC42, SPDYE4, MFSD6L, PIK3R6, PIK3R5, NTN1, STX8, WDR16, USP43, DHRS7C, GLP2R, RCVRN, GAS7, MYH13, MYH8
826	17	17p13.1	17p11.2	0.105769	0.0348837	0.0708855	-0.0104286	0.1522	0.113506	1	NA	NA	MYH4, MYH1, MYH2, MYH3, SCO1, ADPRM, TMEM220, MAGOH2, LINC00675, PIRT, RN7SL601P, SHISA6, DNAH9, ZNF18, RPL21P122, MAP2K4, MIR744, LINC00670, MYOCD, ARHGAP44, MIR1269B, RN7SL550P, ELAC2, HS3ST3A1, MIR548H3, COX10, SNORA74.ENSG00000252305.1, CDRT15, CDRT1, CDRT4, CDRT7, CDRT8, HS3ST3B1, MIR4731, PMP22, RN7SL792P, SNORA74.ENSG00000252129.1, TEKT3, TRIM16, TVP23C, snoU13.ENSG00000238806.1, TBC1D26, …
827	17	17p11.2	17p11.2	0.105769	0.0348837	0.0708855	-0.0104286	0.1522	0.113506	1	NA	NA	TOM1L2, LRRC48, ATPAF2, GID4, DRG2, MYO15A, snoU13.ENSG00000238691.1, ALKBH5, LLGL1, FLII, SMCR7, TOP3A, SMCR8, SHMT1, EVPLL, CCDC144B, FAM106A, KRT16P1, KRT17P2, LGALS9C, RN7SL639P, TBC1D28, USP32P2, ZNF286B, TRIM16L, FBXW10, TVP23B, PRPSAP2, RN7SL627P, SLC5A10, EPN2, FAM83G, GRAPL, GRAP, SNORD3A, SNORD3C, SNORD3D
828	17	17p11.2	17p11.2	0.0865385	0.0232558	0.0632826	-0.0100646	0.13663	0.121847	1	NA	NA	B9D1, MIR1180, MAPK7, MFAP4
829	17	17p11.2	17p11.2	0.0769231	0.0232558	0.0536673	-0.0172651	0.1246	0.185961	1	NA	NA	RNF112, SLC47A1, SNORA59B, ALDH3A2, SNORA31.ENSG00000252349.1, SLC47A2, ALDH3A1, ULK2, AKAP10, SPECC1, CCDC144CP, RN7SL17P, U6.ENSG00000266839.2, UPF3AP2, USP32P3, KRT16P3, LGALS9B, NOS2P3, CDRT15L2, CCDC144NL, USP22, DHRS7B, TMEM11, RN7SL426P, C17orf103, MAP2K3, KCNJ12
830	17	17p11.2	17q11-q12	0.0480769	0.0232558	0.0248211	-0.0378109	0.0874532	0.605032	1	NA	NA	C17orf51, FAM27L, MTND1P15, MTRNR2L1, UBBP4, MIR4522, WSB1, TBC1D3P5, KSR1, LGALS9, RN7SL576P, NOS2, LYRM9, SCARNA20.ENSG00000251818.1, SNORA70.ENSG00000202389.1, NLK, Vault.ENSG00000252283.1, PYY2, PPY2, KRT18P55, TMEM97, IFT20, TNFAIP1, POLDIP2, TMEM199, MIR4723, SARM1, SEBOX, VTN, SLC46A1, SLC13A2, FOXN1, UNC119, PIGS, ALDOC, SPAG5, KIAA0100, SGK494, SDF2, SUPT6H, PROCA1, RAB34, RPL23A, SNORD4…
831	17	17q11-q12	17q11.2	0.0480769	0.0348837	0.0131932	-0.0539464	0.0803328	0.929993	1	NA	NA	FLOT2, DHRS13, PHF12, PIPOX, SEZ6, MYO18A, TIAF1, CRYBA1, NUFIP2, MIR4523, TAOK1, ABHD15, GIT1, TP53I13, ANKRD13B, CORO6, SSH2, SNORA70.ENSG00000252657.1, snoU13.ENSG00000239129.1, EFCAB5, RNY4P13, MIR3184, MIR423, NSRP1, SLC6A4, BLMH, SNORD63.ENSG00000252112.1, TMIGD1, CPD
832	17	17q11	17q11.2	0.0576923	0.0348837	0.0228086	-0.0470742	0.0926914	0.693862	1	NA	NA	GOSR1, TBC1D29
833	17	17q11.2	17q11.2	0.0673077	0.0348837	0.032424	-0.0400252	0.104873	0.502922	1	NA	NA	SMURF2P1
834	17	17q11.2	17q11.2	0.0769231	0.0465116	0.0304114	-0.0480608	0.108884	0.576713	1	NA	NA	ATAD5
835	17	17q11.2	17q11.2	0.0673077	0.0348837	0.032424	-0.0400252	0.104873	0.502922	1	NA	NA	CRLF3, LRRC37BP1, RN7SL316P, SUZ12P
836	17	17q11.2	17q11.2	0.0769231	0.0581395	0.0187835	-0.0630333	0.1006	0.824464	1	NA	NA	TEFM, ADAP2, RN7SL138P, RNF135, MIR4733, NF1, OMG, EVI2B, EVI2A
837	17	17q11.2	17q11.2	0.0673077	0.0465116	0.0207961	-0.0553982	0.0969903	0.765014	1	NA	NA	RAB11FIP4, RN7SL79P, RN7SL45P, MIR4724, MIR193A, RNU6ATAC7P, MIR365B, MIR4725, COPRS, UTP6, SUZ12
838	17	17q11.2	17q11.2	0.0576923	0.0465116	0.0111807	-0.0625995	0.0849609	0.986295	1	NA	NA	RNA5SP437, LRRC37B, SH3GL1P1
839	17	17q11.2	17q11.2	0.0480769	0.0348837	0.0131932	-0.0539464	0.0803328	0.929993	1	NA	NA	RHOT1, RHBDL3, C17orf75, MIR632, ZNF207
840	17	17q11.2	17q12	0.0480769	0.0348837	0.0131932	-0.0539464	0.0803328	0.929993	1	NA	NA	PSMD11, CDK5R1, MYO1D, TMEM98, SPACA3, ASIC2, C17orf102, CCL11, CCL13, CCL1, CCL2, CCL7, CCL8, RNA5SP438, TMEM132E, CCT6B, ZNF830, LIG3, RFFL, snoU13.ENSG00000238858.1, RAD51D, Vault.ENSG00000252328.1, FNDC8, NLE1, UNC45B, SLC35G3, SLFN5, SLFN11, SLFN12, SLFN13, SLFN12L
841	17	17q12	17q12	0.0480769	0.0465116	0.0015653	-0.0605921	0.0637227	1	1	NA	NA	SLFN14
842	17	17q11.2-q12	17q12	0.0480769	0.0348837	0.0131932	-0.0539464	0.0803328	0.929993	1	NA	NA	AP2B1, PEX12, SNORD7, RASL10B, GAS2L2, MMP28, C17orf50
843	17	17q11.1-q11.2	17q12	0.0480769	0.0348837	0.0131932	-0.0539464	0.0803328	0.929993	1	NA	NA	TAF15, C17orf66, CCL5, RN7SKP274, RDM1, LYZL6, CCL16, CCL14, CCL15, CCL23, CCL18, CCL3L1, CCL3L3, CCL3, CCL4L1, CCL4L2, CCL4, GGNBP2, MYO19, PIGW, RN7SL301P, RNA5SP439, TBC1D3B, TBC1D3C, TBC1D3G, TBC1D3H, ZNHIT3
844	17	17q12	17q21	0.0480769	0.0348837	0.0131932	-0.0539464	0.0803328	0.929993	1	NA	NA	DHRS11, MRM1, LHX1, AATF, MIR2909, ACACA, HMGB1P24, C17orf78, TADA2A, DUSP14, SYNRG, DDX52, HNF1B, TBC1D3F, TBC1D3, MRPL45, GPR179, SOCS7, RN7SL458P, ARHGAP23, SRCIN1, RN7SL102P, C17orf96, MIR4734, MLLT6
845	17	17q12	17q12	0.0480769	0.0348837	0.0131932	-0.0539464	0.0803328	0.929993	1	NA	NA	CISD3
846	17	17q12	17q12	0.0480769	0.0348837	0.0131932	-0.0539464	0.0803328	0.929993	1	NA	NA	MIR4726, RNA5SP440
847	17	17q12	17q12	0.0480769	0.0348837	0.0131932	-0.0539464	0.0803328	0.929993	1	NA	NA	PCGF2, PSMB3, PIP4K2B
848	17	17q12	17q12	0.0480769	0.0348837	0.0131932	-0.0539464	0.0803328	0.929993	1	NA	NA	CWC25, MIR4727, C17orf98, RPL23, SNORA21.ENSG00000199293.1, SNORA21.ENSG00000252699.1, LASP1, LINC00672, FBXO47, LRRC37A11P, PLXDC1, ARL5C
849	17	17q21-q22	17q12	0.0480769	0.0348837	0.0131932	-0.0539464	0.0803328	0.929993	1	NA	NA	CACNB1, RPL19, STAC2, FBXL20, MED1, CDK12
850	17	17q12	17q21.3	0.0480769	0.0348837	0.0131932	-0.0539464	0.0803328	0.929993	1	NA	NA	NEUROD2, PPP1R1B, STARD3, TCAP, PNMT, PGAP3, ERBB2, MIR4728, MIEN1, GRB7, IKZF3, ZPBP2, GSDMB, ORMDL3, LRRC3C, GSDMA, PSMD3, CSF3, MED24, SNORD124, THRA, NR1D1, MSL1, CASC3, RAPGEFL1, WIPF2, RNY4P8, CDC6
851	17	17q21	17q21-q22	0.0480769	0.0348837	0.0131932	-0.0539464	0.0803328	0.929993	1	NA	NA	RARA, GJD3, RNA5SP441, TOP2A
852	17	17q12-q21.1	17q21	0.0480769	0.0348837	0.0131932	-0.0539464	0.0803328	0.929993	1	NA	NA	IGFBP4, TNS4, CCR7, KRT222, SMARCE1, KRT24, KRT223P, KRT25, KRT26, KRT27, KRT28, KRT10, TMEM99, KRT12, KRT20, KRT23, KRT39, KRT40, KRT33A, KRT33B, KRT31, KRT34, KRT37, KRT38, KRT32, KRT35, KRT36, KRT13, KRT15, KRT19, LINC00974, KRT9, KRT14, KRT16, JUP, KRT17, KRT42P, EIF1, GAST, HAP1, RNA5SP442, RN7SL399P, LEPREL4, FKBP10, NT5C3B, KLHL10, RN7SL871P, KLHL11, ACLY, TTC25, CNP, DNAJC7, NKIRAS2, ZNF3…
853	17	17q21.31	17q22	0.0480769	0.0232558	0.0248211	-0.0378109	0.0874532	0.605032	1	NA	NA	RNY4P2, SNORA40.ENSG00000212149.1, AARSD1, PTGES3L, RUNDC1, RPL27, IFI35, VAT1, RND2, BRCA1, NBR2, NBR1, ARL4D, LINC00854, LINC00910, TMEM106A, MIR2117, DHX8, ETV4, MEOX1, SOST, DUSP3, C17orf105, MPP3, CD300LG, MPP2, FAM215A, PPY, PYY, NAGS, TMEM101, U3.ENSG00000221044.1, LSM12, G6PC3, HDAC5, C17orf53, ASB16, TMUB2, ATXN7L3, UBTF, SLC4A1, RN7SL507P, RUNDC3A, U3.ENSG00000221496.1, SLC25A39, GRN, F…
854	17	17q22	17q23.1	0.0288462	0.0232558	0.00559034	-0.0452702	0.0564509	1	1	NA	NA	RN7SKP14, TOM1L1, COX11, STXBP4, HLF, MMD, TMEM100, PCTP, ANKFN1, NOG, C17orf67, DGKE, TRIM25, MIR3614, COIL, SCPEP1, RNF126P1, AKAP1, MSI2, RN7SL437P, RN7SL449P, RN7SKP94, MRPS23, CUEDC1, VEZF1, SRSF1, DYNLL2, OR4D1, OR4D2, EPX, MKS1, LPO, MPO, BZRAP1, MIR142, MIR4736, SUPT4H1, RNF43, HSF5, MTMR4, SEPT4, C17orf47, TEX14, U3.ENSG00000212195.1, RAD51C, PPM1E, RN7SL716P, TRIM37, SKA2, MIR454, MIR30…
855	17	17q23.1	17q23.1	0.0384615	0.0232558	0.0152057	-0.0442079	0.0746193	0.85727	1	NA	NA	TUBD1
856	17	17q23.1	17q23.2	0.0288462	0.0232558	0.00559034	-0.0452702	0.0564509	1	1	NA	NA	RPS6KB1, RNFT1, HEATR6, MIR4737, CA4, USP32, SCARNA20.ENSG00000252577.1, C17orf64, RPL12P38, APPBP2, PPM1D, BCAS3, RN7SL606P, RN7SL448P, snoU13.ENSG00000238799.1, TBX2, C17orf82, TBX4, NACA2, BRIP1, INTS2, MED13, RN7SL800P
857	17	17q23.2	17q23.3	0.0384615	0.0232558	0.0152057	-0.0442079	0.0746193	0.85727	1	NA	NA	TBC1D3P2, EFCAB3, METTL2A, TLK2, MRC2, MARCH10, MIR633, TANC2, CYB561, ACE
858	17	17q23.3	17q22-q23.2	0.0288462	0.0232558	0.00559034	-0.0452702	0.0564509	1	1	NA	NA	KCNH6, DCAF7, TACO1, MAP3K3, LIMD2, STRADA, CCDC47, DDX42, FTSJ3, PSMC5, SMARCD2, RN7SL805P, TCAM1P, CSH1, CSH2, CSHL1, GH2, GH1, CD79B, SCN4A, C17orf72, ICAM2, ERN1, SNORA76.ENSG00000266402.2, SNORD104, TEX2, MILR1, POLG2, DDX5, MIR3064, MIR5047, CEP95, SMURF2, PLEKHM1P, RN7SL409P, LRRC37A3, RN7SL404P, SLC16A6P1, AMZ2P1, GNA13, RGS9, AXIN2, CEP112, APOH, RNA5SP444
859	17	17q22-q23.2	17q22-q23.2	0.0384615	0.0232558	0.0152057	-0.0442079	0.0746193	0.85727	1	NA	NA	PRKCA
860	17	17q24.2	17q24.2	0.0288462	0.0232558	0.00559034	-0.0452702	0.0564509	1	1	NA	NA	RN7SL735P, RNA5SP445, MIR634, CACNG5, RNA5SP446, CACNG4, CACNG1, HELZ, RNA5SP447, SNORA8.ENSG00000207410.1
861	17	17q24.2	17q24.2	0.0288462	0.0232558	0.00559034	-0.0452702	0.0564509	1	1	NA	NA	PSMD12
862	17	17q24.2	17q24.2	0.0384615	0.0232558	0.0152057	-0.0442079	0.0746193	0.85727	1	NA	NA	PITPNC1
863	17	17q24.2	17q24.2	0.0288462	0.0232558	0.00559034	-0.0452702	0.0564509	1	1	NA	NA	snoU13.ENSG00000238612.1, RN7SL756P, MIR548D2, NOL11, SNORA38B, BPTF, RN7SL622P, C17orf58, KPNA2, LINC00674, LRRC37A16P, AMZ2, ARSG, SLC16A6, PRKAR1A, WIPI1, MIR635, FAM20A
864	17	17q24	17q25.2	0.0288462	0.0232558	0.00559034	-0.0452702	0.0564509	1	1	NA	NA	ABCA8, ABCA9, ABCA6, MIR4524B, ABCA10, ABCA5, SNORA40.ENSG00000252352.1, MAP2K6, KCNJ16, KCNJ2, SOX9, LINC00511, SLC39A11, RN7SKP180, SCARNA24.ENSG00000252274.1, SSTR2, COG1, FAM104A, C17orf80, CPSF4L, CDC42EP4, SDK2, LINC00469, BTBD17, C17orf77, CD300A, CD300C, CD300E, CD300LB, CD300LD, CD300LF, DNAI2, GPR142, GPRC5C, KIF19, RAB37, RNA5SP448, RPL38, TTYH2, MIR3615, SLC9A3R1, NAT9, TMEM104, GRIN2…
865	17	17q25	17q25	0.0288462	0.0348837	-0.00603757	-0.0624596	0.0503845	1	1	NA	NA	SEPT9
866	17	17q25	17q25.3	0.0288462	0.0232558	0.00559034	-0.0452702	0.0564509	1	1	NA	NA	MIR4316, FLJ45079, TNRC6C, TMC6, TMC8, C17orf99, SYNGR2, TK1, AFMID, BIRC5, TMEM235, SOCS3, RN7SL236P, PGS1, SNORA30.ENSG00000200063.1, DNAH17, RN7SL454P, CYTH1, USP36, TIMP2, DDC8, LGALS3BP, CANT1, C1QTNF1, ENGASE, RBFOX3, MIR4739, snoU13.ENSG00000239173.1, ENPP7, CBX2, CBX8, CBX4
867	17	17q25.3	17q25.3	0.0288462	0.0232558	0.00559034	-0.0452702	0.0564509	1	1	NA	NA	TBC1D16, CCDC40, GAA, EIF4A3, CARD14, SGSH, SLC26A11, RNF213
868	17	17q25.3	17qter	0.0288462	0.0232558	0.00559034	-0.0452702	0.0564509	1	1	NA	NA	ENDOV, MIR4730, NPTX1, RPTOR, CHMP6, BAIAP2, AATK, MIR1250, MIR338, MIR657, AZI1, ENTHD2, C17orf89, SLC38A10, LINC00482, TMEM105, MIR4740, MIR3186, ACTG1, FSCN2, C17orf70, NPLOC4
869	17	17q25.3	17q25.3	0.0288462	0.0232558	0.00559034	-0.0452702	0.0564509	1	1	NA	NA	TSPAN10
870	17	17q25	17q25.3	0.0288462	0.0232558	0.00559034	-0.0452702	0.0564509	1	1	NA	NA	PDE6G, OXLD1, CCDC137, ARL16, HGS, MRPL12, SLC25A10, FAM195B, GCGR, P4HB, PPP1R27, ARHGDIA, ALYREF, ANAPC11, NPB, PCYT2, SIRT7, MAFG, MYADML2, PYCR1, NOTUM, ASPSCR1, STRA13, DCXR, LRRC45, RAC3, RFNG, GPS1, DUS1L, FASN, CCDC57, CSNK1D, SLC16A3, snoU13.ENSG00000238947.1, CD7, SECTM1, TEX19, UTS2R, OGFOD3, HEXDC, C17orf62, NARF, FOXK2, snoU13.ENSG00000238403.1, WDR45B
871	17	17q25.3	17q25.3	0.0288462	0.0232558	0.00559034	-0.0452702	0.0564509	1	1	NA	NA	RAB40B
872	17	17q25.3	17q25.3	0.0288462	0.0232558	0.00559034	-0.0452702	0.0564509	1	1	NA	NA	MIR4525
873	17	17q25.3	17q25.3	0.0480769	0.0232558	0.0248211	-0.0378109	0.0874532	0.605032	1	NA	NA	FN3KRP, FN3K
874	17	17q25.3	17q25.3	0.0480769	0.0348837	0.0131932	-0.0539464	0.0803328	0.929993	1	NA	NA	TBCD
875	17	17q25.3	17q25.3	0.0480769	0.0232558	0.0248211	-0.0378109	0.0874532	0.605032	1	NA	NA	ZNF750
876	17	17q25.3	17q25.3	0.0480769	0.0348837	0.0131932	-0.0539464	0.0803328	0.929993	1	NA	NA	B3GNTL1, METRNL
877	18	18p11.32	18p11.3	0.0576923	0.0116279	0.0460644	-0.0147708	0.1069	0.196735	1	NA	NA	COLEC12, ROCK1P1, THOC1, USP14, C18orf56, CETN1, CLUL1, ENOSF1, RN7SKP146, TYMS, YES1, ADCYAP1, LINC00470, RN7SKP72, METTL4, CBX3P2, NDC80, SMCHD1, snoU109.ENSG00000238575.1, snoU13.ENSG00000238425.1
878	18	18p11.3	18p11.31	0.0576923	0	0.0576923	0.00225944	0.113125	0.0647832	1	NA	NA	EMILIN2, LPIN2, SNORA70.ENSG00000252258.1
879	18	18p11.31	18p11.31	0.0576923	0.0116279	0.0460644	-0.0147708	0.1069	0.196735	1	NA	NA	MYOM1, MYL12A, MYL12B, TGIF1, snoU13.ENSG00000238863.1, DLGAP1, RN7SL39P, snoU13.ENSG00000238445.1, snoU13.ENSG00000238790.1
880	18	18p11.31	18p11.2	0.0480769	0.0116279	0.036449	-0.0211173	0.0940153	0.310917	1	NA	NA	C18orf42, LINC00667, LINC00526, ZBTB14, EPB41L3, snR65.ENSG00000252576.1, SNORD112.ENSG00000252572.1, MIR3976, TMEM200C, L3MBTL4, RN7SL282P, RN7SL723P, RPL6P27, ARHGAP28, LINC00668, LAMA1, RN7SL537P, LRRC30, SNORA48.ENSG00000212626.1, PTPRM
881	18	18p11.2	18p11.3	0.0480769	0	0.0480769	-0.00365976	0.0998136	0.108405	1	NA	NA	U3.ENSG00000199856.1, RN7SL50P, RAB12, SOGA2, NDUFV2, ANKRD12, snoU13.ENSG00000239087.1, TWSG1, RALBP1
882	18	18p11.22	18p11.22	0.0480769	0.0116279	0.036449	-0.0211173	0.0940153	0.310917	1	NA	NA	PPP4R1, RAB31, RN7SL862P, RNA5SP449, TXNDC2, VAPA, RNA5SP450, snoU13.ENSG00000239031.1, APCDD1, NAPG
883	18	18p11.22	18p11.21	0.0576923	0.0116279	0.0460644	-0.0147708	0.1069	0.196735	1	NA	NA	PIEZO2, NPIPB1P
884	18	18p11.22-p11.21	18p11.22-p11.21	0.0576923	0.0116279	0.0460644	-0.0147708	0.1069	0.196735	1	NA	NA	GNAL
885	18	18p11.21	18p11.21	0.0576923	0.0116279	0.0460644	-0.0147708	0.1069	0.196735	1	NA	NA	CHMP1B
886	18	18p11.21	18p11.21	0.0576923	0.0116279	0.0460644	-0.0147708	0.1069	0.196735	1	NA	NA	MPPE1
887	18	18p11.2	18p11.21|18	0.0576923	0.0116279	0.0460644	-0.0147708	0.1069	0.196735	1	NA	NA	IMPA2, ANKRD62, CIDEA
888	18	18p11.21	18p11.21	0.0673077	0.0232558	0.0440519	-0.0243058	0.11241	0.280255	1	NA	NA	TUBB6, AFG3L2, SLMO1, SPIRE1, snoU13.ENSG00000238309.1, CEP76, PSMG2, PTPN2, SEH1L, CEP192
889	18	18p11.21	18p11.21	0.0576923	0.0348837	0.0228086	-0.0470742	0.0926914	0.693862	1	NA	NA	LDLRAD4
890	18	18p11.21	18p11.21	0.0576923	0.0232558	0.0344365	-0.0311641	0.100037	0.415875	1	NA	NA	MIR5190, MIR4526
891	18	18p11.21	18p11.21	0.0576923	0.0116279	0.0460644	-0.0147708	0.1069	0.196735	1	NA	NA	FAM210A, RN7SL362P, RNMT, MC5R, MC2R, ZNF519, ANKRD20A5P, CYP4F35P, CXADRP3, POTEC
892	18	18p11.21	18q11.1	0.0480769	0	0.0480769	-0.00365976	0.0998136	0.108405	1	NA	NA	ANKRD30B, RN7SL662P, ROCK1
893	18	18q11.2	18q11.2	0.0384615	0	0.0384615	-0.00911978	0.0860429	0.183345	1	NA	NA	GREB1L, SNORD23.ENSG00000221139.1, ESCO1, SNRPD1, ABHD3, MIR320C1, MIB1, SNORA81.ENSG00000252677.1, RN7SL233P, SNORA73.ENSG00000199977.1, RNA5SP451, RNU6ATAC20P, GATA6, snoU13.ENSG00000238907.1, CTAGE1, RBBP8, snoU13.ENSG00000238537.1, MIR4741, RN7SL745P, CABLES1, TMEM241, RIOK3, C18orf8, NPC1, ANKRD29, LAMA3, TTC39C, CABYR, OSBPL1A, RNA5SP452, RN7SL247P, MIR320C2, IMPACT, HRH4, ZNF521, RN7SL97P,…
894	18	18q12.1	18q12.1	0.0288462	0	0.0288462	-0.0139431	0.0716355	0.315843	1	NA	NA	DSC3, DSC2, snoU13.ENSG00000238376.1, DSC1, DSG1, DSG4, DSG3, DSG2, TTR, B4GALT6, RN7SKP44, LRRC37A7P, SLC25A52, TRAPPC8, RNF125, RNF138, snoU13.ENSG00000238982.1, GAREM, RNA5SP453, MEP1B, WBP11P1, KLHL14, CCDC178
895	18	18q11	18q12	0.0288462	0	0.0288462	-0.0139431	0.0716355	0.315843	1	NA	NA	ASXL3, NOL4, DTNA, MAPRE2, ZNF397, ZSCAN30, ZNF271, ZNF24, ZNF396
896	18	18q12.2	18q12.1	0.0384615	0	0.0384615	-0.00911978	0.0860429	0.183345	1	NA	NA	INO80C, GALNT1
897	18	18q12.2	18q12.2	0.0480769	0	0.0480769	-0.00365976	0.0998136	0.108405	1	NA	NA	MIR187, MIR3929, C18orf21, RPRD1A
898	18	18q12.2	18q21.1	0.0384615	0	0.0384615	-0.00911978	0.0860429	0.183345	1	NA	NA	SLC39A6, ELP2, MOCOS, FHOD3, SNORD112.ENSG00000252078.1, TPGS2, KIAA1328, CELF4, MIR4318, RN7SKP182, LINC00669, PIK3C3, LINC00907, RNA5SP454, RIT2, SYT4, RNA5SP455, SETBP1, MIR4319, SLC14A2, SLC14A1, SIGLEC15, EPG5, PSTPIP2, RN7SKP26, ATP5A1, HAUS1, C18orf25, RNF165, LOXHD1, ST8SIA5
899	18	18q21.1	18q21.1	0.0480769	0	0.0480769	-0.00365976	0.0998136	0.108405	1	NA	NA	PIAS2
900	18	18q21.1	18q21.1	0.0480769	0	0.0480769	-0.00365976	0.0998136	0.108405	1	NA	NA	KATNAL2
901	18	18q21.1	18q21.2	0.0480769	0	0.0480769	-0.00365976	0.0998136	0.108405	1	NA	NA	TCEB3B, TCEB3CL2, TCEB3CL, TCEB3C, HDHD2, IER3IP1, SKOR2, MIR4527, SMAD2, ZBTB7C, RNA5SP456, CTIF, MIR4743, SMAD7, DYM, MIR4744, C18orf32, MIR1539, RPL17, SNORD58C, SNORD58A, SNORD58B, LIPG, ACAA2, SCARNA17.ENSG00000251992.1, SCARNA17.ENSG00000267322.1, SCARNA18.ENSG00000252139.1, MYO5B, RNA5SP457, RN7SL310P, CCDC11, MBD1, CXXC1, RNA5SP458, SKA1, MAPK4, MRO, ME2, ELAC1, SMAD4, RN7SL695P
902	18	18q21.2	18q21.31	0.0384615	0	0.0384615	-0.00911978	0.0860429	0.183345	1	NA	NA	MEX3C, snoU13.ENSG00000238885.1, DCC, MBD2, SNORA37, POLI, STARD6, C18orf54, DYNAP, RAB27B, CCDC68, RNA5SP459, TCF4, MIR4529, SNORA73.ENSG00000201816.1
903	18	18q21.31	18q21.31	0.0480769	0	0.0480769	-0.00365976	0.0998136	0.108405	1	NA	NA	TXNL1, WDR7
904	18	18q21.31	18q21.3	0.0384615	0	0.0384615	-0.00911978	0.0860429	0.183345	1	NA	NA	U3.ENSG00000212539.1, BOD1L2, ST8SIA3, ONECUT2, FECH
905	18	18q21.31	18q21.31	0.0480769	0	0.0480769	-0.00365976	0.0998136	0.108405	1	NA	NA	NARS, ATP8B1
906	18	18q21	18q21.31	0.0384615	0	0.0384615	-0.00911978	0.0860429	0.183345	1	NA	NA	NEDD4L, MIR122
907	18	18q21.31	18q21.31	0.0384615	0.0116279	0.0268336	-0.0271398	0.080807	0.487132	1	NA	NA	ALPK2
908	18	18q21.31	18q21.3-q22	0.0384615	0	0.0384615	-0.00911978	0.0860429	0.183345	1	NA	NA	SNORD28.ENSG00000252284.1, MALT1, RN7SL112P, U8.ENSG00000199713.1, ZNF532, OACYLP, SEC11C, GRP, RAX, CPLX4, LMAN1
909	18	18q21.32	18q21.32	0.0384615	0	0.0384615	-0.00911978	0.0860429	0.183345	1	NA	NA	CCBE1
910	18	18q21.32	18q22	0.0384615	0	0.0384615	-0.00911978	0.0860429	0.183345	1	NA	NA	PMAIP1, RN7SL342P, MC4R
911	18	18q21.33	18q21.33	0.0480769	0	0.0480769	-0.00365976	0.0998136	0.108405	1	NA	NA	CDH20, RNF152, PIGN
912	18	18q21.33	18q21.33	0.0384615	0	0.0384615	-0.00911978	0.0860429	0.183345	1	NA	NA	KIAA1468, TNFRSF11A, ZCCHC2, RN7SL705P, PHLPP1, BCL2, snoU13.ENSG00000238988.1, KDSR, VPS4B
913	18	18q21.33	18q21.33	0.0384615	0.0116279	0.0268336	-0.0271398	0.080807	0.487132	1	NA	NA	SERPINB5
914	18	18q21.33	18q22.1	0.0384615	0	0.0384615	-0.00911978	0.0860429	0.183345	1	NA	NA	SERPINB12, SERPINB13, SERPINB4, SERPINB11, SERPINB3, SERPINB7, SERPINB2, SERPINB10, HMSD, SERPINB8, LINC00305, CDH7
915	18	18q22.1	18q22.3	0.0480769	0	0.0480769	-0.00365976	0.0998136	0.108405	1	NA	NA	CDH19, MIR5011, DSEL, TMX3, CCDC102B, DOK6, CD226, RTTN, SOCS6, RN7SL795P, GTSCR1, CBLN2, MIR548AV, NETO1, RNA5SP460, RN7SL401P, FBXO15, TIMM21, RN7SL551P, CYB5A, C18orf63, FAM69C, CNDP2, CNDP1, LINC00909
916	18	18q23	18q23	0.0576923	0	0.0576923	0.00225944	0.113125	0.0647832	1	NA	NA	ZNF407
917	18	18q22.3	18q23	0.0480769	0	0.0480769	-0.00365976	0.0998136	0.108405	1	NA	NA	ZADH2, TSHZ1, SMIM21, ZNF516, LINC00908, LINC00683, ZNF236, MBP, GALR1, SNORA25.ENSG00000199392.1, RNA5SP461, SALL3
918	18	18q23	18q23	0.0673077	0	0.0673077	0.00853198	0.126083	0.0389571	1	NA	NA	ATP9B, ADNP2, CTDP1, HSBP1L1, KCNG2, NFATC1, PARD6G, PQLC1, RBFADN, RBFA, TXNL4A
919	19	19p13.3	19p13.3	0.0480769	0.0232558	0.0248211	-0.0378109	0.0874532	0.605032	1	NA	NA	FAM138F, OR4F17, PPAP2C, WASH5P, MIER2
920	19	19p13.3	19p13.3	0.0480769	0.0232558	0.0248211	-0.0378109	0.0874532	0.605032	1	NA	NA	THEG, C2CD4C
921	19	19p13.3	19p13.3	0.0480769	0.0232558	0.0248211	-0.0378109	0.0874532	0.605032	1	NA	NA	SHC2, RNA5SP462, ODF3L2, MADCAM1, TPGS1, CDC34, GZMM, BSG, HCN2, POLRMT, FGF22
922	19	19p13.3	19p13.3	0.0384615	0.0348837	0.00357782	-0.053571	0.0607266	1	1	NA	NA	RNF126, FSTL3, PRSS57, PALM, MISP, PTBP1, MIR4745, AZU1, LPPR3, MIR3187, ARID3A, CFD, ELANE, KISS1R, MED16, PRTN3, R3HDM4, WDR18, GRIN3B, TMEM259, CNN2, ABCA7, HMHA1, POLR2E, GPX4, SBNO2, STK11, ATP5D, C19orf26, CIRBP, MIDN, C19orf24, EFNA2, MUM1, NDUFS7, GAMT, DAZAP1, RPS15, APC2, C19orf25, PCSK4, REEP6, ADAMTSL5, PLK5, MEX3D, MBD3, RN7SL477P, UQCR11, TCF3, ATP8B3, KLF16, MIR1909, ONECUT3, REXO1…
923	19	19p13.3	19p13.3	0.0384615	0.0232558	0.0152057	-0.0442079	0.0746193	0.85727	1	NA	NA	MKNK2, MOB3A, AP3D1, IZUMO4, DOT1L, MIR1227, PLEKHJ1, SF3A2, AMH, JSRP1, MIR4321, C19orf35, OAZ1, LINGO3, LSM7, SPPL2B, TMPRSS9, LMNB2, TIMM13, GADD45B, GNG7, DIRAS1, SLC39A3, SGTA, THOP1, ZNF554, ZNF555, ZNF556, ZNF57, ZNF77, TLE6, TLE2, AES, GNA11, GNA15, S1PR4, NCLN, CELF5, NFIC, C19orf77, DOHH, RN7SL866P, FZR1, SNORD38.ENSG00000252408.1, C19orf71, MFSD12, GIPC3, HMG20B, TBXA2R, CACTIN, PIP5K1…
924	19	19p13.3	19p13.3	0.0192308	0.0232558	-0.00402504	-0.049418	0.0413679	1	1	NA	NA	ZBTB7A, MAP2K2, CREB3L3, SIRT6, ANKRD24, RN7SL84P, EBI3, CCDC94, SHD, TMIGD2, FSD1, STAP2, MPND, SH3GL1, CHAF1A, C19orf10, HDGFRP2, LRG1, MIR4746, PLIN4, PLIN5, RN7SL121P, RN7SL528P, SEMA6B, TNFAIP8L1, UBXN6, DPP9, FEM1A
925	19	19p13.3	19p13.3	0.0192308	0.0232558	-0.00402504	-0.049418	0.0413679	1	1	NA	NA	TICAM1, PLIN3, ARRDC5, UHRF1
926	19	19p13.3	19p13.3	0.0192308	0.0232558	-0.00402504	-0.049418	0.0413679	1	1	NA	NA	MIR4747, KDM4B, PTPRS, RN7SL626P, ZNRF4, TINCR, SAFB2
927	19	19p13.3-p13.2	19p13.3	0.0288462	0.0232558	0.00559034	-0.0452702	0.0564509	1	1	NA	NA	SAFB, RPL36, C19orf70, HSD11B1L, LONP1, CATSPERD, DUS3L, PRR22, NRTN, FUT3, FUT5, FUT6, NDUFA11, CAPS, VMAC, RANBP3, RFX2, ACSBG2, MLLT1, ACER1, CLPP, ALKBH7, GTF2F1, PSPN, KHSRP, MIR3940, SLC25A41, SLC25A23, CRB3, DENND1C, TUBB4A, TNFSF9
928	19	19p13	19p13.1	0.0192308	0.0232558	-0.00402504	-0.049418	0.0413679	1	1	NA	NA	CD70, TNFSF14, C3, GPR108, TRIP10, SH2D3A, VAV1, EMR1, EMR4P, MBD3L2, MBD3L3, MBD3L4, MBD3L5, ZNF557, INSR, ARHGEF18, PEX11G, C19orf45, ZNF358, MCOLN1, PNPLA6, CAMSAP3, XAB2, PCP2, PET100, STXBP2, RETN, C19orf59, TRAPPC5, FCER2, CLEC4G, CD209, CLEC4M, EVI5L, LRRC8E, RNA5SP463, MAP2K7, RN7SL115P, TGFBR3L, SNAPC2, CTXN1, TIMM44, ELAVL1, CCL25, FBN3, CERS4, CD320, NDUFA7, RPS28, KANK3, ANGPTL4, MIR4…
929	19	19p13	19p13	0.0192308	0.0232558	-0.00402504	-0.049418	0.0413679	1	1	NA	NA	ZNF333
930	19	19p13.1	19p13.1	0.00961538	0.0232558	-0.0136404	-0.0612267	0.0339459	0.868041	1	NA	NA	EMR2, OR7A5, OR7C1, OR7A10, OR7A17, OR7C2, SLC1A6, CCDC105, CASP14, OR1I1, SYDE1, ILVBL, NOTCH3, EPHX3, BRD4, AKAP8, AKAP8L, WIZ, MIR1470, RASAL3, PGLYRP2, CYP4F22, CYP4F23P, CYP4F8, CYP4F3, CYP4F12, OR10H2, OR10H3, CYP4F24P, OR10H5, OR10H1, UCA1, CYP4F2, CYP4F11, OR10H4, LINC00661, LINC00905, TPM4, RAB8A, HSH2D, CIB3, FAM32A, AP1M1, KLF2, EPS15L1, RN7SL844P, CALR3, C19orf44, CHERP, RN7SL146P, SL…
931	19	19p13	19p13.11	0.00961538	0.0232558	-0.0136404	-0.0612267	0.0339459	0.868041	1	NA	NA	USHBP1, BABAM1, ANKLE1, ABHD8, MRPL34, DDA1
932	19	19p13.11	19p13.1	0.00961538	0.0232558	-0.0136404	-0.0612267	0.0339459	0.868041	1	NA	NA	ANO8, GTPBP3, PLVAP, BST2, MVB12A, TMEM221, NXNL1, SLC27A1, PGLS, FAM129C, COLGALT1, UNC13A, MAP1S, FCHO1, B3GNT3, INSL3, JAK3, RPL18A, SNORA68.ENSG00000207166.1, SLC5A5, CCDC124, RNA5SP468, ARRDC2, IL12RB1, MAST3, PIK3R2, IFI30, MPV17L2, RAB3A, PDE4C, KIAA1683, JUND, MIR3188, LSM4, RN7SL513P, PGPEP1, GDF15, MIR3189, LRRC25, SSBP4
933	19	19p13.1	19p13.1	0.00961538	0.0348837	-0.0252683	-0.0789665	0.0284298	0.48393	1	NA	NA	ELL
934	19	19p13.11	19p13.11	0.00961538	0.0232558	-0.0136404	-0.0612267	0.0339459	0.868041	1	NA	NA	ISYNA1
935	19	19p12	19p13.2-p13.11	0.00961538	0.0348837	-0.0252683	-0.0789665	0.0284298	0.48393	1	NA	NA	FKBP8, KXD1, CRLF1, UBA52, C19orf60, TMEM59L, RN7SL155P, KLHL26, CRTC1, COMP, UPF1
936	19	19p12	19p12	0.00961538	0.0232558	-0.0136404	-0.0612267	0.0339459	0.868041	1	NA	NA	CERS1, GDF1, COPE, DDX49, HOMER3, RN7SL70P, SUGP2, ARMC6, SLC25A42, TMEM161A, MEF2B, MEF2BNB, RFXANK, NR2C2AP, NCAN, HAPLN4, TM6SF2, SUGP1, MAU2, GATAD2A, MIR640, NDUFA13, TSSK6, YJEFN3, CILP2, PBX4, LPAR2, GMIP, ATP13A1, ZNF101, LINC00663, ZNF14, ZNF506, ZNF253, ZNF430, ZNF486, ZNF626, ZNF66, ZNF682, ZNF737, ZNF826P, ZNF85, ZNF90, ZNF93, ZNF714, RNA5SP469, ZNF431, ZNF708, ZNF738, ZNF493
937	19	19p12	19p12	0.00961538	0.0232558	-0.0136404	-0.0612267	0.0339459	0.868041	1	NA	NA	LINC00664, ZNF429, ZNF100, ZNF43, ZNF208, ZNF257, ZNF676, ZNF729, ZNF98, RN7SL860P, ZNF492, ZNF99, ZNF728, ZNF730, ZNF724P, ZNF91
938	19	19p12	19p12	0.0192308	0.0232558	-0.00402504	-0.049418	0.0413679	1	1	NA	NA	ZNF675, ZNF681, RPSAP58, LINC00662, ZNF254, ZNF726
939	19	19p12	19q13.11	0.00961538	0.0232558	-0.0136404	-0.0612267	0.0339459	0.868041	1	NA	NA	snoU13.ENSG00000238514.1, LINC00906, RNA5SP470, UQCRFS1, RN7SL340P, VSTM2B, POP4, PLEKHF1, C19orf12, CCNE1, URI1, ZNF536, TSHZ3, THEG5, RNA5SP471, RNA5SP472, ZNF507, DPY19L3, PDCD5, ANKRD27, SNORA68.ENSG00000201388.1, RN7SL789P, RGS9BP, NUDT19, TDRD12, SLC7A9, RN7SKP22, CEP89, C19orf40, RHPN2, GPATCH1, WDR88, LRP3, SLC7A10, CEBPA, CEBPG, PEPD
940	19	19q13.1	19q13.1	0.00961538	0.0232558	-0.0136404	-0.0612267	0.0339459	0.868041	1	NA	NA	CHST8
941	19	19q13.11	19q13.11	0.00961538	0.0232558	-0.0136404	-0.0612267	0.0339459	0.868041	1	NA	NA	KCTD15, RN7SL150P, LSM14A, KIAA0355
942	19	19q13.1	19q13.1	0.0192308	0.0232558	-0.00402504	-0.049418	0.0413679	1	1	NA	NA	GPI, PDCD2L, RN7SL154P, UBA2, WTIP, SCGB1B2P, SCGB2B2, SNORD111.ENSG00000252230.1, ZNF302, ZNF181, ZNF599, LINC00904, ZNF30, ZNF792, GRAMD1A, SCN1B, HPN, FXYD3, LGI4, FXYD1, FXYD7, FXYD5, FAM187B, LSR, USF2, HAMP, MAG, CD22, MIR5196, FFAR1, FFAR3, GPR42, RN7SL491P, FFAR2
943	19	19q13.12	19q13.12	0.0192308	0.0348837	-0.015653	-0.0731841	0.0418782	0.829259	1	NA	NA	KRTDAP, DMKN
944	19	19q13.13	19q13.13	0.0192308	0.0232558	-0.00402504	-0.049418	0.0413679	1	1	NA	NA	SBSN, GAPDHS, TMEM147, ATP4A, HAUS5, RBM42, ETV2, COX6B1, RN7SL765P, UPK1A
945	19	19q13.1	19q13.1	0.00961538	0.0232558	-0.0136404	-0.0612267	0.0339459	0.868041	1	NA	NA	ZBTB32, KMT2B, WBP7, IGFLR1, LIN37, PSENEN, U2AF1L4, C19orf55, HSPB6, ARHGAP33, PRODH2, NPHS1, KIRREL2, APLP1, RN7SL402P, NFKBID, HCST, TYROBP, LRFN3, SDHAF1, SYNE4, ALKBH6, CLIP3, THAP8, WDR62, OVOL3, POLR2I, TBCB, CAPNS1, COX7A1, ZNF565, RN7SL287P, ZNF146
946	19	19q13.12	19q13.2	0.00961538	0.0232558	-0.0136404	-0.0612267	0.0339459	0.868041	1	NA	NA	LINC00665, ZFP14, ZFP82, ZNF566, ZNF260, ZNF529, ZNF382, ZNF461, ZNF567, ZNF850, ZNF790, ZNF345, ZNF829, ZNF568, ZNF420, ZNF585A, ZNF585B, ZNF383, HKR1, ZNF527, ZNF569, ZNF570, ZNF793, ZNF540, ZNF571, ZFP30, ZNF781, ZNF607, ZNF573, WDR87, SIPA1L3, DPF1, RN7SL663P, SPINT2, PPP1R14A, C19orf33, YIF1B, KCNK6, CATSPERG, snoU13.ENSG00000238838.1, PSMD8, GGN, SPRED3, FAM98C, RASGRP4, RYR1, MAP4K1, EIF3K…
947	19	19q13.2	19q13.13	0.00961538	0.0232558	-0.0136404	-0.0612267	0.0339459	0.868041	1	NA	NA	FBXO27, PAPL, snoU13.ENSG00000251709.1, PAK4, NCCRP1, SYCN, IFNL3, IFNL4, IFNL2
948	19	19q13.13	19q13.33	0.00961538	0.0232558	-0.0136404	-0.0612267	0.0339459	0.868041	1	NA	NA	IFNL1, LRFN1, GMFG, SAMD4B, RN7SL566P, PAF1, MED29, MIR4530, PLEKHG2, ZFP36, RPS16, SUPT5H, DLL3, TIMM50, SELV, EID2B, EID2, LGALS13, LGALS16, LGALS17A, LGALS14, CLC, LEUTX, DYRK1B, FBL, FCGBP, PSMC4, ZNF546, ZNF780B, ZNF780A, MAP3K10, TTC9B, CNTD2, AKT2, MIR641, C19orf47, PLD3, HIPK4, PRX, SERTAD1, SERTAD3, BLVRB, SPTBN4, LTBP4, RN7SL758P, SHKBP1, NUMBL, ADCK4, ITPKC, C19orf54, SNRPA, MIA, RAB4B…
949	19	19q13.3	19q13.3	0.0192308	0.0232558	-0.00402504	-0.049418	0.0413679	1	1	NA	NA	DHDH, BAX, FTL, GYS1, RUVBL2
950	19	19q13.32	19q13.43	0.00961538	0.0232558	-0.0136404	-0.0612267	0.0339459	0.868041	1	NA	NA	LHB, CGB2, CGB, CGB1, CGB5, CGB7, CGB8, NTF4, KCNA7, RN7SL708P, SNRNP70, LIN7B, C19orf73, PPFIA3, HRC, TRPM4, SLC6A16, MIR4324, CD37, TEAD2, DKKL1, CCDC155, PTH2, SLC17A7, PIH1D1, ALDH16A1, FLT3LG, RPL13A, SNORD32A, SNORD33.ENSG00000199631.1, SNORD34, SNORD35A, RPS11, SNORD35B, FCGRT, MIR150, RCN3, NOSIP, PRRG2, PRR12, RRAS, SCAF1, ADM5, BCL2L12, CPT1C, IRF3, MIR5088, PRMT1, TSKS, AP2A1, FUZ, MED…
951	19	19q13.4	19q13.4	0.0192308	0.0232558	-0.00402504	-0.049418	0.0413679	1	1	NA	NA	ZNF135
952	19	19q13.43	19q13.43	0.00961538	0.0232558	-0.0136404	-0.0612267	0.0339459	0.868041	1	NA	NA	RN7SL526P
953	19	19q13.43	19qter	0.0288462	0.0232558	0.00559034	-0.0452702	0.0564509	1	1	NA	NA	ZSCAN18, ZNF329, ZNF274
954	19	19q13.43	19q13.43	0.0288462	0.0232558	0.00559034	-0.0452702	0.0564509	1	1	NA	NA	ZNF544, ZNF8, ZSCAN22, A1BG, ZNF497, RNA5SP473, CHMP2A, MIR4754, MZF1, RN7SL525P, RN7SL693P, RPL23AP79, RPS5, SLC27A5, TRIM28, UBE2M, ZBTB45, ZNF132, ZNF324B, ZNF324, ZNF446, ZNF584, ZNF837
955	20	20p13	20p13	0.00961538	0.0116279	-0.00201252	-0.0334377	0.0294127	1	1	NA	NA	C20orf96, DEFB125, DEFB126, DEFB127, DEFB128, DEFB129, DEFB132, NRSN2, RBCK1, SOX12, TBC1D20, TRIB3, ZCCHC3, CSNK2A1
956	20	20p13	20p13	0	0.0116279	-0.0116279	-0.0449069	0.0216511	0.923984	1	NA	NA	TCF15, SRXN1, SCRT2, SLC52A3, FAM110A, ANGPT4
957	20	20p13	20p13	0.00961538	0.0116279	-0.00201252	-0.0334377	0.0294127	1	1	NA	NA	RSPO4, C20orf202, PSMF1, TMEM74B
958	20	20p13	20p13	0	0.0116279	-0.0116279	-0.0449069	0.0216511	0.923984	1	NA	NA	RAD21L1, SNPH, SDCBP2, FKBP1A, NSFL1C, SIRPB2, SIRPD, SIRPB1, SIRPG, RN7SL561P, SIRPA, PDYN, STK35, TGM3, TGM6, SNRPB, SNORD119, ZNF343, TMC2, MIR1292, NOP56, SNORA51.ENSG00000271798.1, SNORD110, SNORD86, SNORD56.ENSG00000229686.1, SNORD57, IDH3B, EBF4, CPXM1, C20orf141, TMEM239, PCED1A, VPS16, PTPRA, GNRH2, MRPS26, OXT, AVP, RN7SL555P, UBOX5, FASTKD5, LZTS3, DDRGK1, ITPA, SLC4A11, C20orf194, RN7…
959	20	20p13	20p13	0	0	0	0	0	NA	NA	NA	NA	ATRN, GFRA4, ADAM33, SIGLEC1, HSPA12B, C20orf27, SPEF1, CDC25B, CENPB, AP5S1, MAVS, MIR103A2, PANK2, RNF24, SMOX, ADRA1D, PRNP, PRND, PRNT, RASSF2
960	20	20p13	20p13	0.00961538	0	0.00961538	-0.018755	0.0379858	1	1	NA	NA	SLC23A2
961	20	20p13	20p13	0	0	0	0	0	NA	NA	NA	NA	SNORA31.ENSG00000252096.1, snoU13.ENSG00000252058.1, RN7SL514P, RNA5SP474, TMEM230, PCNA, SNORA26.ENSG00000212517.1, CDS2, PROKR2, GPCPD1, LINC00654, LINC00658
962	20	20p12.3	20p12.3	0	0	0	0	0	NA	NA	NA	NA	C20orf196
963	20	20p12.3	20p12	0	0	0	0	0	NA	NA	NA	NA	CHGB, TRMT6, MCM8, RN7SL498P, CRLS1, LRRN4, FERMT1, BMP2, snoR26, RN7SL547P, HAO1, TMX4, PLCB1, RNU105B, PLCB4, LAMP5, PAK7
964	20	20p12.2	20p12.2	0	0	0	0	0	NA	NA	NA	NA	ANKEF1
965	20	20p12-p11.2	20p11.23	0	0	0	0	0	NA	NA	NA	NA	SNAP25, MKKS, SLX4IP, JAG1, C20orf187, LINC00687, RN7SKP111, BTBD3, SPTLC3, ISM1, TASP1, ESF1, NDUFAF5, SEL1L2, MACROD2, RN7SL864P, FLRT3, RNA5SP475, KIF16B, SNRPB2, OTOR, U3.ENSG00000212165.1, PCSK2, BFSP1, DSTN, RN7SKP69, RRBP1, BANF2, SNX5, OVOL2, SNORD17, MGME1
966	20	20p11.23	20p11.23	0	0	0	0	0	NA	NA	NA	NA	CSRP2BP
967	20	20p11.23	20p11.23	0	0	0	0	0	NA	NA	NA	NA	PET117
968	20	20p11.23	20p11.23	0	0	0	0	0	NA	NA	NA	NA	RN7SL14P, ZNF133, RN7SKP74, RNY4P11, DZANK1, LINC00851, RNA5SP476, POLR3F, MIR3192, RBBP9, SEC23B
969	20	20p11.23	20p11.23	0	0	0	0	0	NA	NA	NA	NA	LINC00493, DTD1, RN7SL638P, RNU6ATAC34P, LINC00652, C20orf78, SCP2D1, SLC24A3, RIN2, NAA20, CRNKL1, C20orf26, RN7SL690P, INSM1, RALGAPA2, RN7SL607P, LINC00237
970	20	20p11.23	20p11.23	0	0	0	0	0	NA	NA	NA	NA	PLK1S1
971	20	20p11.23	20p11.2-p11.1	0	0	0	0	0	NA	NA	NA	NA	RNA5SP477
972	20	20p11.2-p11.1	20q11.21	0	0	0	0	0	NA	NA	NA	NA	XRN2, RN7SKP140, PAX1, LINC00261, FOXA2, SSTR4, THBD, CD93, LINC00656, RNA5SP478, NXT1, GZF1, NAPB, RNA5SP479, CST11, CST13P, CST8, CST9L, CSTL1, CST9, CST3, CST4, CST1, CST2, CST5, GGTLC1, SYNDIG1, CST7, APMAP, ACSS1, VSX1, ENTPD6, PYGB, ABHD12, GINS1, NINL, RNU6ATAC17P, NANP, RN7SL594P, ZNF337, FAM182B, FAM182A, NCOR1P1, MIR663A, FRG1B
973	20	20q11.1	20q11.21	0	0	0	0	0	NA	NA	NA	NA	DEFB115, DEFB116, RNA5SP480, DEFB118, DEFB119, SNORA40.ENSG00000212134.1, DEFB121, DEFB122, DEFB123, DEFB124, REM1, LINC00028, HM13, ID1, MIR3193, COX4I2, BCL2L1, TPX2, MYLK2, FOXS1, DUSP15, TTLL9, PDRG1, XKR7, RNA5SP481, CCM2L, HCK, RNA5SP482, TM9SF4, TSPY26P, PLAGL2, POFUT1, MIR1825
974	20	20q11.21	20q11	0.00961538	0	0.00961538	-0.018755	0.0379858	1	1	NA	NA	KIF3B, ASXL1
975	20	20q11.21	20q11.2	0.0192308	0	0.0192308	-0.0177854	0.0562469	0.562743	1	NA	NA	C20orf112, C20orf203, COMMD7, DNMT3B
976	20	20q11.1-q11.23	20q11.2	0.0192308	0	0.0192308	-0.0177854	0.0562469	0.562743	1	NA	NA	MAPRE1, EFCAB8, SUN5, BPIFB2, BPIFB6, BPIFB3, BPIFB4, BPIFA2, BPIFA4P, BPIFA3, BPIFA1, BPIFB1, CDK5RAP1, SNTA1, RN7SL511P, CBFA2T2, NECAB3, C20orf144, ACTL10, E2F1, PXMP4, ZNF341, CHMP4B, RALY, MIR4755, EIF2S2
977	20	20q11.2-q12	20q11.22	0.0288462	0	0.0288462	-0.0139431	0.0716355	0.315843	1	NA	NA	ASIP, AHCY, ITCH, MIR644A, DYNLRB1, MAP1LC3A, PIGU
978	20	20q11	20q11	0.0288462	0.0116279	0.0172182	-0.0327495	0.067186	0.75256	1	NA	NA	NCOA6
979	20	20q11.22	20q11.22	0.0288462	0	0.0288462	-0.0139431	0.0716355	0.315843	1	NA	NA	TP53INP2
980	20	20q11.22	20q11.22	0.0288462	0.0116279	0.0172182	-0.0327495	0.067186	0.75256	1	NA	NA	GGT7, ACSS2, GSS, MYH7B, MIR499A, TRPC4AP, EDEM2, SNORD56.ENSG00000201151.1, PROCR, RNA5SP483, MMP24, EIF6, FAM83C, UQCC, GDF5OS, GDF5, CEP250
981	20	20q11.22	20q11.23	0.0192308	0.0116279	0.00760286	-0.0347854	0.0499912	1	1	NA	NA	C20orf173, ERGIC3, FER1L4, SPAG4, CPNE1, NFS1, RN7SKP271, RBM12, RBM39, ROMO1, snoU13.ENSG00000238549.1, PHF20, SCAND1, CNBD2, LINC00657, EPB41L1, snoU13.ENSG00000239089.1, AAR2, DLGAP4, MYL9, TGIF2, C20orf24, SLA2, NDRG3, DSN1, SOGA1, RN7SL156P
982	20	20q11.23	20q13.13	0.0288462	0.0116279	0.0172182	-0.0327495	0.067186	0.75256	1	NA	NA	TLDC2, SAMHD1, RBL1, MROH8, RPN2, GHRH, MANBAL, SRC, BLCAP, NNAT, LINC00489, CTNNBL1, VSTM2L, RN7SKP185, TTI1, RPRD1B, RN7SL237P, TGM2, KIAA1755, BPI, LBP, SNHG17, SNORA71B, SNORA71A, SNORA71C, SNORA71D, SNORA71.ENSG00000201811.1, SNHG11, SNORA60, RALGAPB, MIR548O2, ADIG, ARHGAP40, SLC32A1, ACTR5, RN7SKP173, PPP1R16B, RN7SL116P, FAM83D, DHX35, RN7SL680P, RN7SL194P, SNORD112.ENSG00000252434.1, MAF…
983	20	20q13.1-q13.2	20q13.1-q13.2	0.0288462	0.0232558	0.00559034	-0.0452702	0.0564509	1	1	NA	NA	PTPN1
984	20	20q13.13	20q13.13	0.0288462	0.0116279	0.0172182	-0.0327495	0.067186	0.75256	1	NA	NA	RN7SL672P, FAM65C, MIR645
985	20	20q13.13	20q13.13	0.0192308	0.0116279	0.00760286	-0.0347854	0.0499912	1	1	NA	NA	PARD6B, BCAS4, ADNP, DPM1
986	20	20q13.13	20q13	0.0192308	0	0.0192308	-0.0177854	0.0562469	0.562743	1	NA	NA	MOCS3, KCNG1
987	20	20q13.2	20q13.2	0.0192308	0.0116279	0.00760286	-0.0347854	0.0499912	1	1	NA	NA	NFATC2, MIR3194, ATP9A
988	20	20q13.2	20q13.2	0.0192308	0	0.0192308	-0.0177854	0.0562469	0.562743	1	NA	NA	SALL4, RN7SL603P, ZFP64
989	20	20q13.2	20q13.2	0.0288462	0	0.0288462	-0.0139431	0.0716355	0.315843	1	NA	NA	TSHZ2
990	20	20q13.2	20q13.2	0.0192308	0	0.0192308	-0.0177854	0.0562469	0.562743	1	NA	NA	RN7SKP184
991	20	20q13.2	20q13.2	0.0192308	0	0.0192308	-0.0177854	0.0562469	0.562743	1	NA	NA	ZNF217
992	20	20q13.2	20q13.2	0.0192308	0	0.0192308	-0.0177854	0.0562469	0.562743	1	NA	NA	BCAS1, MIR4756, CYP24A1, PFDN4, DOK5, RNU4ATAC7P, CBLN4, RNA5SP487, MC3R, FAM210B, AURKA, CSTF1, CASS4, RTFDC1, snoU13.ENSG00000238294.1, GCNT7, FAM209A, FAM209B, U3.ENSG00000252536.1, TFAP2C
993	20	20q13.31	20q13.31	0.00961538	0	0.00961538	-0.018755	0.0379858	1	1	NA	NA	RN7SL170P, BMP7, MIR4325, SPO11, RAE1, MTRNR2L3, RBM38, CTCFL
994	20	20q13.31	20q13.31-q13.33	0	0	0	0	0	NA	NA	NA	NA	PCK1, ZBP1, PMEPA1
995	20	20q13.31-q13.33	20q13.32	0	0.0116279	-0.0116279	-0.0449069	0.0216511	0.923984	1	NA	NA	MIR4532
996	20	20q13.32	20q13.2-q13.3	0	0	0	0	0	NA	NA	NA	NA	C20orf85, ANKRD60, PPP4R1L, RAB22A, VAPB, APCDD1L, MGC4294, STX16, NPEPL1, MIR296, MIR298, GNAS, NELFCD, CTSZ, TUBB1, ATP5E, SLMO2, ZNF831, EDN3
997	20	20q13.32-q13.33	20q13.33	0	0	0	0	0	NA	NA	NA	NA	PHACTR3, SYCP2, FAM217B, PPP1R3D, CDH26, C20orf197, MIR646, MIR4533, MIR548AG2, CDH4, MIR1257, TAF4, LSM14B, PSMA7, SS18L1, MTG2, HRH3, OSBPL2, ADRM1, LAMA5, MIR4758, RPS21, CABLES2, RBBP8NL, GATA5, C20orf166, MIR133A2, SLCO4A1, LINC00686, NTSR1, LINC00659, MRGBP, OGFR, COL9A3, TCFL5, DIDO1, GID8, SLC17A9, BHLHE23, LINC00029, HAR1A, HAR1B, YTHDF1, BIRC7, MIR3196, NKAIN4, ARFGAP1, MIR4326, COL20A1…
998	20	20q13.3	20q13.33	0	0.0116279	-0.0116279	-0.0449069	0.0216511	0.923984	1	NA	NA	KCNQ2, EEF1A2, PPDPF
999	20	20q13.33	20q13.33	0	0.0232558	-0.0232558	-0.0657308	0.0192192	0.395677	1	NA	NA	C20orf195, PTK6, SRMS, HELZ2, GMEB2, ABHD16B, ARFRP1, C20ORF135, C20orf201, DNAJC5, LIME1, LINC00176, MIR1914, MIR647, MYT1, NPBWR2, OPRL1, PCMTD2, PRPF6, RGS19, RTEL1, SAMD10, SLC2A4RG, SOX18, STMN3, TCEA2, TNFRSF6B, TPD52L2, UCKL1, ZBTB46, ZGPAT, ZNF512B
1000	21	21q11.2	21q11	0.00961538	0.0116279	-0.00201252	-0.0334377	0.0294127	1	1	NA	NA	ANKRD20A11P, ANKRD30BP2, BAGE2, CYP4F29P, MIR3648, MIR3687, POTED, RN7SL52P, SNORA70.ENSG00000252199.1, TEKT4P2, TPTE, RNA5SP488, LIPI, RBM11
1001	21	21q11.2	21q11.2	0.00961538	0.0116279	-0.00201252	-0.0334377	0.0294127	1	1	NA	NA	ABCC13
1002	21	21q11	21q11	0	0.0116279	-0.0116279	-0.0449069	0.0216511	0.923984	1	NA	NA	HSPA13, SAMSN1
1003	21	21q11.2	21q21.1	0.00961538	0.0116279	-0.00201252	-0.0334377	0.0294127	1	1	NA	NA	NRIP1, USP25, snoU13.ENSG00000238591.1
1004	21	21q21.1	21q11.2	0.00961538	0.0232558	-0.0136404	-0.0612267	0.0339459	0.868041	1	NA	NA	LINC00478, SNORD74.ENSG00000201025.1, MIR99A, MIRLET7C, MIR125B2, C21orf37, RN7SL163P, CXADR, BTG3, C21orf91, CHODL
1005	21	21q21.1	21q21.1	0.0192308	0.0232558	-0.00402504	-0.049418	0.0413679	1	1	NA	NA	TMPRSS15
1006	21	21q21.1	21q21.1	0.00961538	0.0232558	-0.0136404	-0.0612267	0.0339459	0.868041	1	NA	NA	MIR548X, RN7SKP147, LINC00320, NCAM2, LINC00317, LINC00308, RN7SL609P, X7SK.ENSG00000232512.2, RNA5SP489, LINC00158, snoU13.ENSG00000238314.1, MIR155HG, LINC00515, MRPL39, JAM2, ATP5J, GABPA, APP, CYYR1, ADAMTS1, ADAMTS5, MIR4759
1007	21	21q21.3	21q22.11	0.00961538	0.0232558	-0.0136404	-0.0612267	0.0339459	0.868041	1	NA	NA	LINC00113, LINC00314, LINC00161, N6AMT1, LTN1, RWDD2B, USP16, CCT8
1008	21	21q22.3	21q22.11	0.00961538	0.0232558	-0.0136404	-0.0612267	0.0339459	0.868041	1	NA	NA	MAP3K7CL, U3.ENSG00000212479.1, BACH1, LINC00189
1009	21	21q22.11	21q22.11	0.00961538	0.0232558	-0.0136404	-0.0612267	0.0339459	0.868041	1	NA	NA	snoU13.ENSG00000239171.1, GRIK1, CLDN17, LINC00307, CLDN8, MIR4327, TIAM1, SOD1, SCAF4, SNORA81.ENSG00000238390.1, HUNK, LINC00159, MIS18A, MRAP, URB1, RN7SL109P, SNORA80, C21orf119, EVA1C, SNORA33.ENSG00000252045.1, RNA5SP490, LINC00846, TCP10L, C21ORF59, C21orf59, SYNJ1, PAXBP1, C21orf49, C21orf62, SNORA70.ENSG00000207098.1, OLIG2, LINC00945, OLIG1, C21orf54, IFNAR2, IL10RB, IFNAR1, IFNGR2
1010	21	21q22.11	21q22.12	0.00961538	0.0116279	-0.00201252	-0.0334377	0.0294127	1	1	NA	NA	TMEM50B, DNAJC28, GART, SON, DONSON, CRYZL1, ITSN1, ATP5O, LINC00649, RN7SL740P, MRPS6, SLC5A3, LINC00310, KCNE1, KCNE2
1011	21	21q22.12	21q22.12	0.00961538	0.0116279	-0.00201252	-0.0334377	0.0294127	1	1	NA	NA	RCAN1
1012	21	21q22.12	21q22.12	0.00961538	0.0116279	-0.00201252	-0.0334377	0.0294127	1	1	NA	NA	SMIM11, SNORA11.ENSG00000221398.1
1013	21	21q22.12	21q22.12	0.00961538	0.0116279	-0.00201252	-0.0334377	0.0294127	1	1	NA	NA	CLIC6, LINC00160
1014	21	21q22.3	21q22.3	0	0.0116279	-0.0116279	-0.0449069	0.0216511	0.923984	1	NA	NA	RUNX1
1015	21	21q22.12	5q13.3	0.00961538	0.0116279	-0.00201252	-0.0334377	0.0294127	1	1	NA	NA	MIR802, FKSG68
1016	21	21q22.13	21q22.3	0	0.0116279	-0.0116279	-0.0449069	0.0216511	0.923984	1	NA	NA	SETD4, CBR1, CBR3, DOPEY2, RN7SL73P, snoU13.ENSG00000238851.1, MORC3, CHAF1B, CLDN14
1017	21	21q22.13	21q22.2	0	0.0116279	-0.0116279	-0.0449069	0.0216511	0.923984	1	NA	NA	SIM2, HLCS, RNA5SP491, RIPPLY3, PIGP, TTC3, DSCR9, RN7SL678P, DSCR3, DYRK1A, KCNJ6, DSCR4
1018	21	21q22.2	21q22.13	0	0.0116279	-0.0116279	-0.0449069	0.0216511	0.923984	1	NA	NA	DSCR8, KCNJ15, snoU13.ENSG00000238581.1, DSCR10
1019	21	21q22.3	21q22.3	0	0.0232558	-0.0232558	-0.0657308	0.0192192	0.395677	1	NA	NA	ERG, LINC00114, ETS2, SNORA62.ENSG00000272015.1, PSMG1, BRWD1, HMGN1, snoU13.ENSG00000238556.1, WRB, LCA5L, SH3BGR
1020	21	21q22.3	21q22.3	0	0.0116279	-0.0116279	-0.0449069	0.0216511	0.923984	1	NA	NA	B3GALT5, C21orf88, IGSF5, PCP4, DSCAM, MIR4760, SNORA51.ENSG00000207147.1, LINC00323, BACE2, MIR3197, FAM3B, MX2, MX1, TMPRSS2, SNORA32.ENSG00000207503.1, snoU13.ENSG00000252771.1, LINC00111, LINC00479, LINC00112, RIPK4
1021	21	21q22.3	21q22.3	0	0.0116279	-0.0116279	-0.0449069	0.0216511	0.923984	1	NA	NA	PRDM15
1022	21	21q22.3	21q22.3	0.00961538	0.0116279	-0.00201252	-0.0334377	0.0294127	1	1	NA	NA	SNORA3.ENSG00000251778.1, C2CD2, ZBTB21, UMODL1, C21orf128, ABCG1, RNA5SP492, TFF3, TFF2, TFF1, TMPRSS3, UBASH3A, RSPH1, SLC37A1, PDE9A, WDR4, NDUFV3, MIR5692B, PKNOX1, CBS, U2AF1, CRYAA, LINC00313, LINC00319, LINC00322, SIK1, HSF2BP, RRP1B
1023	21	21q22.3	21q22.3	0.00961538	0.0116279	-0.00201252	-0.0334377	0.0294127	1	1	NA	NA	PDXK
1024	21	21q22.3	21q22.3	0.00961538	0.0116279	-0.00201252	-0.0334377	0.0294127	1	1	NA	NA	CSTB, RRP1, AGPAT3, TRAPPC10
1025	21	21q22.3	21q22.3	0.00961538	0.0116279	-0.00201252	-0.0334377	0.0294127	1	1	NA	NA	PWP2, C21orf33, ICOSLG, DNMT3L, AIRE, PFKL, C21orf2, TRPM2, snoZ6.ENSG00000264452.1, snoZ6.ENSG00000266692.1, LRRC3, LRRC3DN, TSPEAR, C21orf90, UBE2G2, SUMO3, PTTG1IP, ITGB2, C21orf67, FAM207A, LINC00163, LINC00162, SSR4P1, ADARB1, PRED57, PRED58, COL18A1, LINC00205, LINC00315, LINC00316, LINC00334, PCBP3, POFUT2, SLC19A1, PRED60, PRED62, COL6A1, COL6A2, FTCD, SPATC1L, LSS, MCM3AP, C21orf58, DIP2…
1026	22	22q11.1	22q11.2	0.00961538	0.0116279	-0.00201252	-0.0334377	0.0294127	1	1	NA	NA	CCT8L2, HSFY1P1, KCNMB3P1, OR11H1, POTEH, TPTEP1, XKR3, GAB4, CECR7, IL17RA, CECR6, CECR5, CECR1, CECR3, CECR9, RN7SL843P, CECR2, SLC25A18, ATP6V1E1, BCL2L13, snoU13.ENSG00000251737.1, BID, LINC00528, MICAL3, MIR648, PEX26, TUBA8, AIFM3, ARVCF, BCRP2, C22orf29, C22orf39, CCDC116, CDC45, CLDN5, CLTCL1, COMT, CRKL, DGCR14, DGCR2, DGCR5, DGCR6L, DGCR6, DGCR8, FAM230A, FAM230B, FAM230C, GGT2, GGT3P, …
1027	22	22q11.2	22q11.23	0.00961538	0.0116279	-0.00201252	-0.0334377	0.0294127	1	1	NA	NA	C22orf43, GUSBP11, IGLL1, RGL4, VPREB3, ZNF70, C22orf15, CHCHD10
1028	22	22q11.23	22q11.23	0.00961538	0.0116279	-0.00201252	-0.0334377	0.0294127	1	1	NA	NA	MMP11, SMARCB1, DERL3, SLC2A11, RN7SL268P, MIF
1029	22	22q11.23	22q13.31	0.00961538	0.0116279	-0.00201252	-0.0334377	0.0294127	1	1	NA	NA	CABIN1, DDTL, DDT, GSTT1, GSTT2B, GSTT2, GSTTP2, SUSD2, GGT5, POM121L9P, SPECC1L, ADORA2A, UPB1, GUCD1, SNRPD3, FAM211B, GGT1, PIWIL3, SGSM1, SNORD56.ENSG00000199783.1, TMEM211, KIAA1671, CRYBB3, CRYBB2, ADRBK2, CRYBB2P1, LRP5L, RNA5SP494, MYO18B, RN7SKP169, SEZ6L, RNA5SP495, ASPHD2, HPS4, SRRD, TFIP11, TPST2, MIR548J, CRYBB1, CRYBA4, MIAT, MN1, PITPNB, TTC28, RN7SL757P, SNORD42.ENSG00000201209.1…
1030	22	22q13.31	22q13.2-q13.33	0.00961538	0.0232558	-0.0136404	-0.0612267	0.0339459	0.868041	1	NA	NA	SAMM50, PARVB
1031	22	22q13.31	22q13.31	0.00961538	0.0116279	-0.00201252	-0.0334377	0.0294127	1	1	NA	NA	PARVG, KIAA1644, LDOC1L, LINC00207, LINC00229, PRR5, ARHGAP8, PHF21B, NUP50, KIAA0930, MIR1249, UPK3A, FAM118A, SMC1B, RIBC2
1032	22	22q13.31	22q13.31	0.00961538	0.0232558	-0.0136404	-0.0612267	0.0339459	0.868041	1	NA	NA	FBLN1
1033	22	22q13.31	22q13	0.00961538	0.0116279	-0.00201252	-0.0334377	0.0294127	1	1	NA	NA	ATXN10, MIR4762
1034	22	22q13	22q13.31	0.00961538	0.0116279	-0.00201252	-0.0334377	0.0294127	1	1	NA	NA	WNT7B, LINC00899, C22orf26, FLJ27365, MIR3619, MIR4763, MIRLET7A3, MIRLET7B, PPARA, CDPF1, PKDREJ, TTC38, GTSE1, TRMU, CELSR1, GRAMD4, CERK, TBC1D22A, LINC00898
1035	22	22q13.31	22q13.31	0.0192308	0.0116279	0.00760286	-0.0347854	0.0499912	1	1	NA	NA	MIR3201
1036	22	22q13.32	22q13.32	0.0192308	0.0348837	-0.015653	-0.0731841	0.0418782	0.829259	1	NA	NA	FAM19A5
1037	22	22q13.32	22q13.32	0.0192308	0.0232558	-0.00402504	-0.049418	0.0413679	1	1	NA	NA	MIR4535
1038	22	22q13.33	22q13.33	0.0192308	0.0232558	-0.00402504	-0.049418	0.0413679	1	1	NA	NA	ACR, ADM2, ALG12, ARSA, BRD1, C22orf34, CHKB, CPT1B, CRELD2, DENND6B, HDAC10, IL17REL, KLHDC7B, LMF2, MAPK11, MAPK12, MAPK8IP2, MIOX, MIR3667, MLC1, MOV10L1, NCAPH2, ODF3B, PANX2, PIM3, PLXNB2, PPP6R2, RABL2B, RN7SKP252, RN7SL500P, SBF1, SCO2, SHANK3, SYCE3, TRABD, TTLL8, TUBGCP6, TYMP, ZBED4

## Sheet: BLCA
Bin Information				Proportion		ΔProportion	Confidence Interval		p/q-values
Bin Number	Chromosome	Start Location	End Location	Male	Female	Male - Female	Lower	Upper	Prop test p-value	Prop test q-value	MLR p-value	MLR q-value	Genes in Bin
1	1	1p36.32	1p36.32	0.183673	0.227723	-0.0440493	-0.143695	0.0555965	0.413066	1	NA	NA	ACAP3, ACTRT2, AGRN, ANKRD65, ATAD3A, ATAD3B, ATAD3C, AURKAIP1, B3GALT6, C1orf159, C1orf170, C1orf222, C1orf233, C1orf86, CALML6, CCNL2, CDK11A, CDK11B, CPSF3L, DDX11L1, DVL1, FAM132A, FAM138A, FAM213B, FAM41C, FAM87B, GABRD, GLTPD1, GNB1, HES4, HES5, ISG15, KLHL17, LINC00115, LINC00982, MIB2, MIR200A, MIR200B, MIR429, MMEL1, MMP23B, MORN1, MRPL20, MXRA8, NADK, NOC2L, OR4F16, OR4F29, OR4F5, PANK4…
2	1	1p36.32	1p36.23	0.197279	0.217822	-0.0205429	-0.119656	0.0785705	0.764405	1	NA	NA	MIR4417, MIR4689, NPHP4, KCNAB2, CHD5, RPL22, RNF207, ICMT, LINC00337, GPR153, HES3, ACOT7, HES2, ESPN, MIR4252, PLEKHG5, TNFRSF25, NOL9, TAS1R1, ZBTB48, KLHL21, PHF13, THAP3, DNAJC11, snoU13.ENSG00000239166.1, CAMTA1
3	1	1p36.23	1p36.21	0.210884	0.19802	0.0128646	-0.0844206	0.11015	0.894331	1	NA	NA	VAMP3, PER3, UTS2, TNFRSF9, PARK7, ERRFI1, RN7SL729P, SLC45A1, RERE, SNORA77.ENSG00000221083.1, ENO1, CA6, RN7SL451P, SLC2A7, SLC2A5, SCARNA16.ENSG00000252404.1, GPR157, MIR34A, H6PD, SPSB1, RNA5SP40, SLC25A33, TMEM201, C1orf200, PIK3CD, CLSTN1, CTNNBIP1, LZIC, NMNAT1, RN7SKP269, MIR5697, RBP7, UBE4B, KIF1B, MIR1273D, RN7SL731P, RN7SL721P, PGD, APITD1, CORT, DFFA, PEX14, RN7SL614P, CASZ1, C1orf12…
4	1	1p36.21	1p36.13	0.187075	0.207921	-0.020846	-0.118332	0.0766398	0.754874	1	NA	NA	KAZN, TMEM51, C1orf195, FHAD1, EFHD2, CTRC, CELA2A, CELA2B, CASP9, DNAJC16, SCARNA21.ENSG00000251866.1, AGMAT, DDI2, RSC1A1, PLEKHM2, FBLIM1, SLC25A34, TMEM82, SPEN, snoU13.ENSG00000238818.1, ZBTB17, C1orf64, HSPB7, CLCNKA, CLCNKB, FAM131C, EPHA2, ARHGEF19, ANO7P1, C1orf134, RSG1, FBXO42, SZRD1, SPATA21, NECAP2, CROCCP3, ATP13A2, CROCCP2, CROCC, ESPNP, MFAP2, MIR3675, MST1L, NBPF1, U1.ENSG0000022…
5	1	1p36.13	1p35.3	0.221088	0.19802	0.0230686	-0.0746333	0.120771	0.72906	1	NA	NA	SDHB, PADI2, PADI1, PADI3, MIR3972, PADI4, PADI6, RCC2, snoU13.ENSG00000239020.1, ARHGEF10L, ACTL8, IGSF21, KLHDC7A, PAX7, TAS1R2, ALDH4A1, MIR4695, MIR1290, IFFO2, UBR4, EMC1, MRTO4, AKR7A3, AKR7L, AKR7A2, PQLC2, RN7SL85P, CAPZB, RN7SL277P, snoU13.ENSG00000239027.1, MINOS1, NBL1, HTR6, TMCO4, RNF186, OTUD3, PLA2G2E, PLA2G2A, RN7SL304P, PLA2G5, PLA2G2D, PLA2G2F, PLA2G2C, UBXN10, VWA5B1, CAMK2N1, …
6	1	1p35.3	1p35.3	0.234694	0.217822	0.0168721	-0.083731	0.117475	0.83331	1	NA	NA	ARID1A, RN7SL501P, PIGV, RN7SL165P, ZDHHC18, SFN, GPN2, GPATCH3, NUDC, NR0B2, C1orf172, TRNP1, FAM46B, SLC9A1, WDTC1, TMEM222, SYTL1, MAP3K6, FCN3, CD164L2, GPR3, WASF2, AHDC1, FGR, IFI6, FAM76A, STX12, PPP1R8, SCARNA1, THEMIS2, RPA2, SMPDL3B, XKR8, EYA3, RN7SL559P, PTAFR, DNAJC8, ATPIF1, SESN2, MED18, PHACTR4, RNU6ATAC27P, RCC1, SNHG3, SNORA73B, snoU13.ENSG00000238821.1, TRNAU1AP, SNHG12, SNORD9…
7	1	1p34	1p35.2	0.204082	0.178218	0.0258638	-0.0684955	0.120223	0.675619	1	NA	NA	LAPTM5, MATN1, MIR4420, RN7SKP91, SDC3, PUM1, SNORD103A, SNORD103B, SNORD85
8	1	1p35.2	1p35.1	0.20068	0.158416	0.0422644	-0.0490428	0.133572	0.431108	1	NA	NA	NKAIN1, SNRNP40, ZCCHC17, FABP3, SERINC2
9	1	1p35.2	1p35.1	0.210884	0.168317	0.0425675	-0.0506784	0.135813	0.436264	1	NA	NA	TINAGL1, HCRTR1, PEF1, COL16A1, BAI2, MIR4254, SPOCD1, PTP4A2, KHDRBS1, TMEM39B, MIR5585, KPNA6, TXLNA, CCDC28B, IQCC, DCDC2B, TMEM234, EIF3I, MTMR9LP, FAM167B, LCK, HDAC1, MARCKSL1, TSSK3, BSDC1, FAM229A, RN7SL122P, ZBTB8B, ZBTB8A, ZBTB8OS, RBBP4, SYNC, KIAA1522, YARS, S100PBP
10	1	1p35.1	1p34.3	0.204082	0.158416	0.0456658	-0.0457976	0.137129	0.390815	1	NA	NA	FNDC5, HPCA, TMEM54, RNF19B, FKSG48, AK2, ADC, TRIM62, ZNF362, A3GALT2, PHC2, MIR3605, RN7SKP16
11	1	1p34.3	1p34.3	0.207483	0.138614	0.0688691	-0.0195733	0.157312	0.168994	1	NA	NA	ZSCAN20, CSMD2, HMGB4, RNA5SP42, C1orf94
12	1	1p34.3	1p34.3	0.204082	0.138614	0.0654678	-0.0228147	0.15375	0.191224	1	NA	NA	MIR552, SMIM12, GJB5, GJB4, GJB3, GJA4, DLGAP3, SNORD112.ENSG00000252728.1, ZMYM6NB, ZMYM6, ZMYM1, SFPQ, RN7SL136P, ZMYM4, RN7SL503P, SNORA62.ENSG00000201542.1, RNY5P1
13	1	1p34.2	1p34.3	0.204082	0.138614	0.0654678	-0.0228147	0.15375	0.191224	1	NA	NA	KIAA0319L, NCDN, TFAP2E, PSMB2, RN7SL281P, C1orf216, CLSPN, AGO4, AGO1, AGO3, TEKT2, ADPRHL2, COL8A2, TRAPPC3, MAP7D1, RN7SL131P, THRAP3, SH3D21, EVA1B, STK40, LSM10, OSCP1, SNORA63.ENSG00000201448.1, MRPS15, CSF3R, GRIK3
14	1	1p34.3	1p34.3	0.180272	0.128713	0.0515592	-0.0338081	0.136927	0.296611	1	NA	NA	MIR4255, RNA5SP43
15	1	1p34.3	1p34.3	0.173469	0.128713	0.0447565	-0.0402451	0.129758	0.369915	1	NA	NA	ZC3H12A, MEAF6, MIR5581, SNIP1, DNALI1, GNL2, RSPO1, C1orf109, CDCA8, EPHA10, snoU13.ENSG00000238871.1, MANEAL, YRDC, C1orf122, MTF1, INPP5B, SNORA63.ENSG00000252448.1, SF3A3, FHL3, UTP11L, POU3F1, MIR3659
16	1	1p34	1p34	0.159864	0.118812	0.0410521	-0.0413415	0.123446	0.402721	1	NA	NA	RRAGC, MYCBP, GJA9
17	1	1p34.3	1p34.2-p33	0.153061	0.0990099	0.0540513	-0.0239212	0.132024	0.235183	1	NA	NA	RHBDL2, AKIRIN1, NDUFS5
18	1	1p32-p31	1p32	0.139456	0.0990099	0.0404459	-0.0366394	0.117531	0.382221	1	NA	NA	MACF1, RNA5SP44, KIAA0754, BMP8A, PABPC4, SNORA55, HEYL, HPCAL4, NT5C1A, PPIE
19	1	1p35-p32	1p34.2	0.129252	0.0990099	0.0302418	-0.0461479	0.106631	0.531303	1	NA	NA	BMP8B, OXCT2, TRIT1, MYCL, MFSD2A, CAP1, PPT1, RLF, TMCO2, ZMPSTE24, COL9A2, SMAP2, ZFP69B, ZFP69, EXO5, ZNF684, RIMS3
20	1	1p32	1p34	0.136054	0.0891089	0.0469455	-0.0276985	0.12159	0.289217	1	NA	NA	NFYC, MIR30E, MIR30C1, KCNQ4, RN7SL326P, CITED4, CTPS1, SLFNL1, SCMH1
21	1	1p34.2	1p34.2	0.142857	0.0990099	0.0438472	-0.0334641	0.121159	0.340158	1	NA	NA	FOXO6, RNA5SP45, EDN2, HIVEP3, GUCA2B, GUCA2A, FOXJ3, RIMKLA, ZMYND12, PPCS, CCDC30, PPIH, YBX1, CLDN19, LEPRE1, C1orf50, CCDC23, ERMAP, ZNF691, SLC2A1, FAM183A, EBNA1BP2, WDR65, RNA5SP46, TMEM125, C1orf210
22	1	1p34-p33	1p34.1	0.153061	0.0891089	0.0639523	-0.0118436	0.139748	0.148127	1	NA	NA	TIE1, MPL, CDC20, ELOVL1, MED8, SZT2, HYI, PTPRF, KDM4A, ST3GAL3, ARTN, IPO13, DPH2, ATP6V0B, B4GALT2, CCDC24, SLC6A9, KLF17, RN7SL479P, DMAP1, ERI3, RNF220, MIR5584
23	1	1p34.1	1p34.1	0.139456	0.0990099	0.0404459	-0.0366394	0.117531	0.382221	1	NA	NA	TMEM53, C1orf228, KIF2C, BEST4, BTBD19, PLK3, RPS8, SNORD38A, SNORD38B, SNORD46.ENSG00000200913.1, SNORD55, TCTEX1D4, PTCH2, EIF2B3, RNA5SP47, HECTD3, UROD, ZSWIM5, HPDL, MUTYH, TESK2, TOE1, snoU13.ENSG00000238945.1, CCDC163P, MMACHC, PRDX1, AKR1A1, NASP, CCDC17, GPBP1L1, TMEM69
24	1	1p34-p32	1p34.1	0.136054	0.0990099	0.0370445	-0.0398118	0.113901	0.42805	1	NA	NA	IPP, MAST2
25	1	1p34.1	1p34-p32	0.129252	0.0990099	0.0302418	-0.0461479	0.106631	0.531303	1	NA	NA	PIK3R3, TSPAN1, POMGNT1, LURAP1, RAD54L, LRRC41, UQCRH, NSUN4, FAAH, LINC00505, DMBX1, KNCN, MKNK1, MOB3C, ATPAF1, EFCAB14, TEX38, CYP4B1, CYP4Z2P, CYP4A11, CYP4X1, CYP4Z1, CYP4A22, LINC00853, PDZK1IP1, TAL1, STIL, CMPK1, FOXE3, FOXD2
26	1	1p33	1p33	0.139456	0.108911	0.0305449	-0.0486269	0.109717	0.540056	1	NA	NA	TRABD2B, SKINTL, SLC5A9, SPATA6
27	1	1p33	1p33	0.14966	0.138614	0.011046	-0.0743714	0.0964634	0.914267	1	NA	NA	AGBL4
28	1	1p33	1p33	0.139456	0.0990099	0.0404459	-0.0366394	0.117531	0.382221	1	NA	NA	BEND5
29	1	1p33	1p34	0.139456	0.108911	0.0305449	-0.0486269	0.109717	0.540056	1	NA	NA	snoU13.ENSG00000239144.1
30	1	1p34	1p32.3	0.129252	0.128713	0.000538829	-0.0757359	0.0768136	1	1	NA	NA	ELAVL4, DMRTA2, FAF1, CDKN2C, MIR4421, C1orf185, snoU13.ENSG00000238618.1, RNF11, TTC39A
31	1	1p32	1p32.2	0.146259	0.128713	0.0175456	-0.0658969	0.100988	0.786547	1	NA	NA	EPS15, OSBPL9, SNORA26.ENSG00000212624.1, NRD1, MIR761, RAB3B, RNA5SP48, RN7SL290P, TXNDC12, KTI12, BTF3L4, ZFYVE9, RN7SL788P, CC2D1B, ORC1, PRPF38A, ZCCHC11, snoU13.ENSG00000239063.1, GPX7, FAM159A, SELRC1, RN7SL62P, ZYG11B, ZYG11A, ECHDC2, SCP2, MIR1273F, MIR5095, MIR1273G, PODN, SLC1A7, CPT2, C1orf123, MAGOH, LRP8, SLC25A3P1, DMRTB1, GLIS1, NDC1, SNORA58.ENSG00000201003.1, YIPF1, DIO1, HSPB11,…
32	1	1p32.2	1p32-p31	0.142857	0.138614	0.00424328	-0.078366	0.0868526	1	1	NA	NA	PPAP2B, PRKAA2, C1orf168, C8A, C8B, DAB1
33	1	1p32.2-p32.1	1p32-p31	0.136054	0.138614	-0.00255944	-0.0830749	0.077956	1	1	NA	NA	OMA1, RN7SL713P, TACSTD2, MYSM1, JUN
34	1	1p32.1	1p32.1	0.142857	0.148515	-0.00565771	-0.0913759	0.0800605	1	1	NA	NA	FGGY, MIR4711, HOOK1, CYP2J2, RN7SL475P, C1orf87
35	1	1p31.3-p31.2	1p31.3	0.139456	0.128713	0.0107429	-0.0722852	0.093771	0.91775	1	NA	NA	NFIA, TM2D1, INADL, RN7SL180P
36	1	1p31.3	1p31	0.180272	0.138614	0.0416582	-0.0454425	0.128759	0.418659	1	NA	NA	L1TD1, KANK4, USP1, DOCK7, ANGPTL3, ATG4C, LINC00466, RNA5SP49, FOXD3, ALG6, ITGB3BP, EFCAB7, RN7SL488P, DLEU2L, PGM1, RN7SL130P, ROR1, UBE2U, CACHD1, MIR4794, RAVER2, JAK1, MIR3671, AK4, DNAJC6, LEPROT, LEPR, snoU13.ENSG00000238931.1, RN7SL854P, PDE4B
37	1	1p31.3	1p31.3-p31.2	0.153061	0.128713	0.0243484	-0.0594987	0.108195	0.664638	1	NA	NA	SGIP1, MIR3117, TCTEX1D1, INSL5, WDR78, MIER1, SLC35D1, C1orf141, SNORA31.ENSG00000252433.1, IL23R, RNU4ATAC4P
38	1	1p31.3-p31.2	1p31.2	0.153061	0.128713	0.0243484	-0.0594987	0.108195	0.664638	1	NA	NA	IL12RB2, SERBP1, RN7SL392P, GADD45A, GNG12, DIRAS3, WLS, MIR1262, RPE65, DEPDC1
39	1	1p31.1	1p31.1	0.159864	0.128713	0.0311511	-0.0530905	0.115393	0.553962	1	NA	NA	LRRC7, RN7SL538P, PIN1P1, LRRC40, RN7SL242P, SRSF11, ANKRD13C, HHLA3, CTH, PTGER3, ZRANB2, MIR186
40	1	1p31.1	1p31.1	0.166667	0.128713	0.0379538	-0.0466726	0.12258	0.455608	1	NA	NA	NEGR1
41	1	1p31.1	1p31.1	0.166667	0.118812	0.0478548	-0.0349329	0.130642	0.322848	1	NA	NA	RN7SKP19, RNA5SP50, RNU4ATAC8P, LRRIQ3, FPGT, TNNI3K, LRRC53, C1orf173, CRYZ, TYW3
42	1	1p31.1	1p33-p32	0.166667	0.118812	0.0478548	-0.0349329	0.130642	0.322848	1	NA	NA	LHX8, SLC44A5, ACADM, RABGGTB, SNORD45C, SNORD45A, SNORD45B, MSH4, ASB17, ST6GALNAC3, ST6GALNAC5, PIGK, AK5, ZZZ3, RNA5SP20, RN7SL370P, USP33, FAM73A, RNA5SP21, NEXN, FUBP1, DNAJB4, GIPC2, RNA5SP22, PTGFR, RNA5SP23, IFI44L, IFI44, ELTD1
43	1	1p33-p32	1p31.1	0.166667	0.138614	0.0280528	-0.0583231	0.114429	0.612292	1	NA	NA	RN7SKP247, LPHN2
44	1	1p31.1	1p22.1	0.197279	0.178218	0.0190611	-0.0749944	0.113117	0.784884	1	NA	NA	TTLL7, PRKACB, SNORA2.ENSG00000199959.1, SAMD13, UOX, DNASE2B, RPF1, GNG5, SPATA1, CTBS, C1orf180, SSX2IP, LPAR3, MCOLN2, WDR63, MCOLN3, MIR4423, SYDE2, C1orf52, BCL10, DDAH1, CYR61, SNORD81.ENSG00000199934.1, ZNHIT6, COL24A1, RNA5SP51, ODF2L, CLCA2, CLCA1, CLCA4, CLCA3P, SH3GLB1, HS2ST1, LMO4, RNA5SP52, RN7SL583P, PKN2, GTF2B, CCBL2, RBMXL1, GBP3, GBP1, GBP2, GBP7, GBP4, GBP5, GBP6, GBP1P1, LRRC…
45	1	1p22.1	1p21.3	0.193878	0.158416	0.0354617	-0.0555271	0.126451	0.519855	1	NA	NA	RN7SL692P, RN7SKP123, MTF2, TMED5, CCDC18, DR1, FNBP1L, RNA5SP53, BCAR3, MIR760, DNTTIP2, GCLM, ABCA4, ARHGAP29, RN7SL440P, snoU13.ENSG00000238389.1, ABCD3, F3, MIR378G, SLC44A3, CNN3, ALG14, TMEM56, RWDD3
46	1	1p21.3	1p21.3	0.183673	0.128713	0.0549606	-0.030586	0.140507	0.264393	1	NA	NA	RN7SL831P, RN7SKP270, PTBP2
47	1	1p22	1p22	0.183673	0.138614	0.0450596	-0.0422166	0.132336	0.377708	1	NA	NA	DPYD
48	1	1p21.3	1p22	0.187075	0.148515	0.03856	-0.050534	0.127654	0.468744	1	NA	NA	MIR137HG, SNX7, LPPR5, LPPR4, PALMD, FRRS1, AGL, SLC35A3, HIAT1, SASS6, TRMT13, LRRC39, DBT, RTCA, MIR553, CDC14A, GPR88, VCAM1, EXTL2, SLC30A7, DPH5, SCARNA16.ENSG00000252765.1, snoU13.ENSG00000238296.1, S1PR1, OLFM3
49	1	1p21	1p21	0.176871	0.138614	0.0382569	-0.0486661	0.12518	0.462606	1	NA	NA	COL11A1
50	1	1p21	1p21	0.180272	0.138614	0.0416582	-0.0454425	0.128759	0.418659	1	NA	NA	RN7SKP285, AMY1A, AMY1B, AMY1C, AMY2A, AMY2B, RNPC3
51	1	1p13.3	1p13.3	0.156463	0.138614	0.0178487	-0.0679592	0.103657	0.78678	1	NA	NA	PRMT6, NTNG1, VAV3
52	1	1p13.3	1p13.3	0.163265	0.148515	0.0147505	-0.0731085	0.102609	0.847902	1	NA	NA	SLC25A24, NBPF4, SLC25A24P1, NBPF5P, NBPF6, FAM102B, HENMT1, PRPF38B, FNDC7, STXBP3, AKNAD1, SPATA42, GPSM2, CLCC1, WDR47, TAF13, C1orf194, KIAA1324, SCARNA2, TMEM167B, SARS, CELSR2, PSRC1, MYBPHL, SORT1, PSMA5, SYPL2, ATXN7L2, CYB561D1, AMIGO1, GPR61, GNAI3, RNU6V, MIR197, GNAT2, AMPD2, GSTM1, GSTM2, GSTM4, GSTM5, GSTM3, EPS8L3, CSF1, AHCYL1, STRIP1, ALX3, UBL4B, SLC6A17, KCNC4, SNORA25.ENSG0000…
53	1	1p13.3	1p13.1	0.142857	0.118812	0.0240453	-0.0573184	0.105409	0.660665	1	NA	NA	snoU13.ENSG00000239111.1, snoU13.ENSG00000238761.1, CTTNBP2NL, WNT2B, ST7L, CAPZA1, snoU13.ENSG00000238975.1, MOV10, RHOC, PPM1J, FAM19A3, SLC16A1, LRIG2
54	1	1p12-p11.2	1p12-p11.2	0.146259	0.128713	0.0175456	-0.0658969	0.100988	0.786547	1	NA	NA	MAGI3
55	1	1p13	1p13.2	0.12585	0.128713	-0.00286253	-0.0812421	0.075517	1	1	NA	NA	PHTF1, RSBN1, PTPN22, BCL2L15, AP4B1, DCLRE1B, HIPK1, OLFML3, SYT6, TRIM33, BCAS2, DENND2C
56	1	1p13	1p13.1	0.12585	0.128713	-0.00286253	-0.0812421	0.075517	1	1	NA	NA	AMPD1, RN7SL432P, NRAS, CSDE1, SIKE1, SYCP1, TSHB, TSPAN2, NGF, RN7SL420P, SNORA42.ENSG00000207502.1
57	1	1p13.1	1p13.1	0.12585	0.118812	0.00703846	-0.0732297	0.0873066	0.991872	1	NA	NA	VANGL1, CASQ2, NHLH2, SLC22A15, MAB21L3, U3.ENSG00000221040.1, ATP1A1, ATP1A1OS, CD58, MIR548AC, IGSF3, MIR320B1, C1orf137
58	1	1p13.1	1p11.1	0.115646	0.108911	0.00673537	-0.0708207	0.0842914	0.998167	1	NA	NA	CD2, PTGFRN, RNA5SP55, CD101, TTF2, MIR942, TRIM45, VTCN1, MAN1A2, FAM46C, SNORA40.ENSG00000212266.1, GDAP2, WDR3, SPAG17, RNA5SP56
59	1	1p11.1	1p12	0.112245	0.0990099	0.013235	-0.0619356	0.0884056	0.854582	1	NA	NA	TBX15, WARS2, snoU13.ENSG00000238679.1, HAO2, HSD3B2, HSD3B1, LINC00622, ZNF697, PHGDH, HMGCS2, REG4, ADAM30
60	1	1p13-p11	1q21.1	0.0544218	0.049505	0.00491682	-0.0496191	0.0594528	1	1	NA	NA	NOTCH2, ACP6, ANKRD20A12P, ANKRD34A, ANKRD35, BCL9, BOLA1, CD160, CHD1L, FAM72B, FAM72C, FAM72D, FCGR1A, FCGR1B, FCGR1C, FMO5, GJA5, GJA8, GNRHR2, GPR89A, GPR89B, GPR89C, HFE2, HIST2H2AA3, HIST2H2AA4, HIST2H2AB, HIST2H2AC, HIST2H2BA, HIST2H2BE, HIST2H2BF, HIST2H3A, HIST2H3C, HIST2H3D, HIST2H4A, HIST2H4B, HYDIN2, ITGA10, LINC00623, LINC00624, LIX1L, NBPF10, NBPF11, NBPF12, NBPF14, NBPF15, NBPF16, …
61	1	1q21.2	1q23.1	0.0544218	0.049505	0.00491682	-0.0496191	0.0594528	1	1	NA	NA	SF3B4, MTMR11, OTUD7B, VPS45, PLEKHO1, RN7SL480P, ANP32E, CA14, snoU13.ENSG00000238526.1, APH1A, C1orf54, C1orf51, MRPS21, PRPF3, RPRD2, TARS2, ECM1, LINC00568, ADAMTSL4, MIR4257, C1orf138, RN7SL473P, RN7SL600P, MCL1, ENSA, SNORA40.ENSG00000253047.1, GOLPH3L, HORMAD1, CTSS, CTSK, ARNT, SETDB1, CERS2, ANXA9, FAM63A, PRUNE, BNIPL, C1orf56, CDC42SE1, MLLT11, GABPB2, SEMA6C, LYSMD1, SCNM1, TNFAIP8L2,…
62	1	1q23.1	1q23.1	0.0646259	0.049505	0.0151209	-0.0423192	0.072561	0.758536	1	NA	NA	OR10X1, OR6P1, OR6Y1
63	1	1q23.1	1q22	0.0578231	0.039604	0.0182192	-0.0348916	0.0713299	0.654847	1	NA	NA	OR10Z1, SPTA1, OR6K2, OR6K3, OR6K6, OR6N1, OR6N2, MNDA
64	1	1q23.1	1q23	0.0442177	0.049505	-0.00528726	-0.0589675	0.048393	1	1	NA	NA	PYHIN1, IFI16, AIM2, CADM3, RNA5SP60, DARC, FCER1A, OR10J3, OR10J4, OR10J1, OR10J5, APCS, CRP, DUSP23, FCRL6, SLAMF8, C1orf204, SNORD64.ENSG00000212161.1, VSIG8, CCDC19, TAGLN2, IGSF9, SLAMF9, PIGM, KCNJ10, KCNJ9, IGSF8, ATP1A2, ATP1A4, CASQ1, PEA15, DCAF8, PEX19, COPA, NCSTN, NHLH1, VANGL2, SLAMF6, CD84, SLAMF1, CD48, SLAMF7, LY9, CD244, ITLN1, ITLN2, F11R, TSTD1, USF1, ARHGAP30, PVRL4, KLHDC9, …
65	1	1q23	1q24.2	0.0612245	0.049505	0.0117195	-0.0453366	0.0687757	0.851145	1	NA	NA	PBX1, SNORD112.ENSG00000252359.1, LMX1A, RXRG, LRRC52, MGST3, ALDH9A1, TMCO1, UCK2, RNA5SP64, FAM78B, MIR921, FMO9P, POGK, TADA1, ILDR2, MAEL, RNA5SP65, snoU13.ENSG00000238325.1, GPA33, DUSP27, POU2F1, CD247, CREG1, RCSD1
66	1	1q24.2	1q23	0.0646259	0.049505	0.0151209	-0.0423192	0.072561	0.758536	1	NA	NA	MPZL1, ADCY10, MPC2, DCAF6, MIR1255B2, GPR161, TIPRL, SFT2D2, ANKRD36BP1, TBX19, MIR557, XCL2, XCL1, DPT, LINC00626, LINC00970, RNA5SP66, ATP1B1, NME7, BLZF1, CCDC181, SLC19A2, F5, SELP, C1orf112, SELL, SELE, METTL18, SCYL3, RN7SL333P, KIFAP3, RN7SL269P, METTL11B, GORAB, PRRX1, MROH9, FMO3, MIR1295A, FMO6P, FMO2, FMO1, FMO4, snoU13.ENSG00000238859.1, PRRC2C, RN7SL425P, MYOC, VAMP4, SCARNA20.ENSG0…
67	1	1q23	1q23	0.0782313	0.049505	0.0287263	-0.0301923	0.087645	0.455786	1	NA	NA	TNFSF18
68	1	1q25	1q25.2	0.0816327	0.0792079	0.00242473	-0.0612662	0.0661157	1	1	NA	NA	TNFSF4, snoU13.ENSG00000251817.1, PRDX6, SLC9C2, ANKRD45, snoU13.ENSG00000238430.1, KLHL20, RN7SKP160, CENPL, DARS2, GAS5, SNORD78.ENSG00000208317.1, ZBTB37, SERPINC1, RNA5SP67, RC3H1, RNA5SP68, RABGAP1L, snoU13.ENSG00000238872.1, GPR52, CACYBP, MRPS14, TNN, KIAA0040, TNR, RFWD2, SCARNA3, PAPPA2, ASTN1, MIR488, FAM5B, SEC16B, RASAL2, LINC00083, TEX35, C1ORF220, C1orf220, RNA5SP69, MIR4424, RALGPS…
69	1	1q25.2	1q25.3	0.0918367	0.0594059	0.0324308	-0.0309213	0.0957829	0.419212	1	NA	NA	SNORA67.ENSG00000201619.1, SNORA67.ENSG00000212338.1, SOAT1, AXDND1, RN7SL374P, NPHS2, TDRD5, FAM163A, TOR1AIP2, IFRG15, TOR1AIP1, RN7SL230P, CEP350, QSOX1, LHX4, ACBD6, MIR3121, XPR1, U6.ENSG00000272292.1, KIAA1614, STX6, MR1, IER5, CACNA1E, RNA5SP70, RN7SKP229
70	1	1q25.3	1q25.1-q31.1	0.0986395	0.0693069	0.0293325	-0.037444	0.096109	0.494425	1	NA	NA	ZNF648, GLUL, TEDDM1, LINC00272, RGSL1, RNASEL, RGS16, RGS8, NPL, DHX9, SHCBP1L, RNA5SP71, LAMC1, LAMC2, NMNAT2, SMG7, NCF2, ARPC5, RGL1, APOBEC4, COLGALT2, TSEN15, RN7SL654P, C1orf21, SNORD112.ENSG00000252790.1, EDEM3, FAM129A, RNA5SP72, RNF2, TRMT1L, SWT1, IVNS1ABP
71	1	1q25.3-q31.1	1q25.3-q31.1	0.102041	0.0792079	0.0228329	-0.0468359	0.0925017	0.634211	1	NA	NA	HMCN1
72	1	1q25-q31	1q25	0.105442	0.0693069	0.0361352	-0.0312267	0.103497	0.385969	1	NA	NA	PRG4, TPR, C1orf27, OCLM, PDC, PTGS2, PLA2G4A, RN7SKP156
73	1	1q25	1q31.1	0.112245	0.0792079	0.033037	-0.0374576	0.103532	0.453204	1	NA	NA	RNA5SP73, FAM5C
74	1	1q31.2	1q31.3	0.112245	0.0891089	0.023136	-0.049766	0.096038	0.642887	1	NA	NA	RGS18, RGS21, RGS1, RGS13, RGS2, RN7SKP126, UCHL5, snoU109.ENSG00000238754.1, TROVE2, GLRX2, CDC73, MIR1278, B3GALT2, U3.ENSG00000252241.1
75	1	1q31.3	1q31.3	0.129252	0.108911	0.0203408	-0.0581556	0.0988372	0.718794	1	NA	NA	KCNT2, MIR4735, CFH, CFHR1, CFHR2, CFHR3, CFHR4, CFHR5, F13B, ASPM, ZBTB41
76	1	1q31-q32.1	1q32.1	0.139456	0.118812	0.0206439	-0.060506	0.101794	0.721881	1	NA	NA	CRB1, DENND1B, C1orf53, LHX9, NEK7, ATP6V1G3, PTPRC, MIR181A1HG, MIR181A1, MIR181B1
77	1	1q32.1	1q32.1	0.139456	0.0891089	0.0503469	-0.0245335	0.125227	0.254535	1	NA	NA	NR5A2, LINC00862, ZNF281, KIF14, DDX59, CAMSAP2, GPR25, C1orf106
78	1	1q32.1	1q32.1	0.139456	0.0990099	0.0404459	-0.0366394	0.117531	0.382221	1	NA	NA	KIF21B, CACNA1S, ASCL5
79	1	1q32.1	1q32.1	0.146259	0.0990099	0.0472486	-0.030286	0.124783	0.301737	1	NA	NA	TMEM9, IGFN1
80	1	1q32	1q31.3	0.163265	0.108911	0.0543544	-0.0262979	0.135007	0.245911	1	NA	NA	PKP1, TNNT2, LAD1, TNNI1
81	1	1q31	1q32.2	0.183673	0.118812	0.0648616	-0.0188683	0.148591	0.17609	1	NA	NA	PHLDA3, CSRP1, RPS10P7, NAV1, MIR5191, MIR1231, IPO9, SHISA4, LMOD1, TIMM17A, SNORA70.ENSG00000206637.1, RNPEP, ELF3
82	1	1q32.1	1q32.1	0.180272	0.118812	0.0614602	-0.0220861	0.145007	0.199963	1	NA	NA	GPR37L1, ARL8A, PTPN7, PTPRVP, LGR6, snoU13.ENSG00000238571.1, snoU13.ENSG00000239046.1, UBE2T, PPP1R12B, U6.ENSG00000272262.1, SNORA70.ENSG00000253042.1, SYT2
83	1	1q32.1	1q32	0.166667	0.0990099	0.0676568	-0.0111586	0.146472	0.137833	1	NA	NA	KDM5B, PCAT6, RABIF, KLHL12, ADIPOR1, CYB5R1, TMEM183A, PPFIA4, MYOG, ADORA1, MYBPH, CHI3L1, CHIT1, BTG2, FMOD, PRELP, OPTC, ATP2B4, SNORA77.ENSG00000221643.1, LAX1, ZBED6, ZC3H11A, SNRPE, LINC00303, SOX13, ETNK2, REN, KISS1, GOLT1A, PLEKHA6, PPP1R15B, PIK3C2B, MDM4, RNA5SP74, LRRN2, RNA5SP75, SCARNA20.ENSG00000251861.1, NFASC, SNORD112.ENSG00000252946.1, CNTN2, TMEM81, RBBP5, DSTYK, TMCC2, NUAK2…
84	1	1q32	1q42.12	0.20068	0.118812	0.0818684	-0.0027439	0.166481	0.089426	1	NA	NA	CR1, CR1L, CD46, MIR29B2, MIR29C, C1orf132, CD34, PLXNA2, MIR205HG, CAMK1G, LAMB3, MIR4260, G0S2, HSD11B1, TRAF3IP3, C1orf74, IRF6, DIEXF, SYT14, SERTAD4, HHAT, KCNH1, RCOR3, TRAF5, LINC00467, RD3, SLC30A1, NEK2, LPGAT1, RN7SL344P, INTS7, SNORA26.ENSG00000212187.1, DTL, MIR3122, RN7SKP98, PPP2R5A, SNORA16B, TMEM206, NENF, ATF3, RN7SL512P, FAM71A, BATF3, NSL1, TATDN3, C1orf227, FLVCR1, VASH2, ANGE…
85	1	1q42.1	1q42.13	0.136054	0.0990099	0.0370445	-0.0398118	0.113901	0.42805	1	NA	NA	LBR, ENAH, SRP9, EPHX1, TMEM63A, LEFTY1, PYCR2, LEFTY2, SDE2, H3F3A, ACBD3, MIXL1, LIN9, snoU13.ENSG00000238545.1, snoU13.ENSG00000239094.1, PARP1, RN7SKP165, C1orf95, ITPKB, PSEN2, ADCK3, CDC42BPA, RNA5SP77, ZNF678, JMJD4
86	1	1q42.13	1q42.13	0.139456	0.108911	0.0305449	-0.0486269	0.109717	0.540056	1	NA	NA	SNAP47, PRSS38, WNT9A, MIR5008, WNT3A, ARF1, MIR3620, C1orf35, MRPL55, GJC2, GUK1, C1orf148, IBA57, C1orf145, OBSCN, BTNL10, HIST3H2A, HIST3H2BB, HIST3H3, MIR4666A, RNA5S10, RNA5S11, RNA5S12, RNA5S13, RNA5S14, RNA5S15, RNA5S16, RNA5S17, RNA5S1, RNA5S2, RNA5S3, RNA5S4, RNA5S5, RNA5S6, RNA5S7, RNA5S8, RNA5S9, RNA5SP18, RNA5SP19, RNF187, SNORA51.ENSG00000206878.1, TRIM11, TRIM17, RHOU, TMEM78, RAB4A…
87	1	1q41-q42	1q42.3	0.139456	0.128713	0.0107429	-0.0722852	0.093771	0.91775	1	NA	NA	GALNT2, PGBD5, COG2, AGT, RN7SL467P, CAPN9, RNA5SP79, C1orf198, RN7SL837P, snoU13.ENSG00000238985.1, TTC13, ARV1, FAM89A, MIR1182, TRIM67, C1orf131, GNPAT, RNA5SP80, EXOC8, SPRTN, EGLN1, TRAX, TSNAX, DISC1, LINC00582, RN7SL299P, SIPA1L2, MAP10, NTPCR, PCNXL2, MLK4, KCNK1, MIR4427, SLC35F3, MIR4671, COA6, TARBP1, U8.ENSG00000212144.1, IRF2BP2, LINC00184, RNY4P16, RN7SL668P, TOMM20, ARID4B, RBM34, …
88	1	1q43	1q43	0.139456	0.0891089	0.0503469	-0.0245335	0.125227	0.254535	1	NA	NA	LGALS8, HEATR1, ACTN2, MTR, MT1HL1, RYR2, RN7SKP195, MIR4428, SNORA25.ENSG00000252290.1, ZP4, MTRNR2L11
89	1	1q43	1q43	0.139456	0.0990099	0.0404459	-0.0366394	0.117531	0.382221	1	NA	NA	CHRM3
90	1	1q43	1q43	0.136054	0.118812	0.0172425	-0.063691	0.0981761	0.785927	1	NA	NA	FMN2, GREM2, RGS7, MIR3123, FH, KMO, OPN3, CHML, WDR64, EXO1, MAP1LC3C
91	1	1q43	1q44	0.136054	0.118812	0.0172425	-0.063691	0.0981761	0.785927	1	NA	NA	PLD5, RNA5SP81, RN7SKP12, CEP170, SDCCAG8, MIR4677, AKT3, ZBTB18, RN7SL148P, C1orf100, ADSS, C1orf101, DESI2
92	1	1q44	1q44	0.122449	0.0891089	0.0333401	-0.0403276	0.107008	0.466417	1	NA	NA	COX20, HNRNPU, RN7SKP55, EFCAB2, KIF26B
93	1	1q44	1q44	0.132653	0.108911	0.0237422	-0.0549822	0.102467	0.655841	1	NA	NA	SMYD3, AHCTF1, CNST, SCCPDH, SNORA25.ENSG00000252011.1, SNORD112.ENSG00000252495.1, TFB2M
94	1	1q44	1q44	0.129252	0.0792079	0.0500438	-0.0217575	0.121845	0.24084	1	NA	NA	ZNF670, ZNF695, ZNF669, C1orf229, ZNF124, MIR3916, RNA5SP82, ZNF496, NLRP3, OR2B11, OR2W5, GCSAML, OR2C3, OR2G2, OR2G3, LYPD8, MIR3124, OR11L1, OR13G1, OR14A16, OR14A2, OR14C36, OR14I1, OR14K1, OR1C1, OR2AJ1, OR2AK2, OR2G6, OR2L13, OR2L2, OR2L3, OR2L5, OR2L8, OR2M2, OR2M3, OR2M4, OR2M5, OR2M7, OR2T10, OR2T11, OR2T12, OR2T1, OR2T27, OR2T29, OR2T2, OR2T33, OR2T34, OR2T35, OR2T3, OR2T4, OR2T5, OR2T6…
95	2	2p25	2p25	0.108844	0.0594059	0.0494376	-0.0154597	0.114335	0.208358	1	NA	NA	ACP1, FAM110C, FAM150B, SH3YL1, TMEM18, MYT1L, PXDN, SNTG2, TPO, snoU13.ENSG00000238722.1, TSSC1, TRAPPC12, ADI1, RNASEH1, RPS7, SNORA73.ENSG00000252531.1, COLEC11, ALLC, DCDC2C, RN7SL531P, SNORA31.ENSG00000252238.1
96	2	2p25	2p25.1	0.0884354	0.0594059	0.0290294	-0.0340005	0.0920593	0.477022	1	NA	NA	SOX11, FLJ30594, LINC00487, CMPK2, RSAD2, RNF144A, RN7SKP112, RNU6ATAC37P, LINC00299, ID2, KIDINS220, MBOAT2, snoU13.ENSG00000238888.1, ASAP2, ITGB1BP1, CPSF3, IAH1, ADAM17, snoU13.ENSG00000238462.1, YWHAQ, TAF1B, GRHL1, KLF11, CYS1
97	2	2p25.1	2p23.3	0.112245	0.0990099	0.013235	-0.0619356	0.0884056	0.854582	1	NA	NA	SNORA26.ENSG00000212558.1, RRM2, C2orf48, SNORA2.ENSG00000206647.1, MIR4261, RN7SL66P, SNORA51.ENSG00000206898.1, HPCAL1, ODC1, SNORA80B, NOL10, RN7SL832P, ATP6V1C2, PDIA6, KCNF1, C2orf50, PQLC3, ROCK2, LINC00570, E2F6, RNA5SP84, GREB1, MIR4429, RNA5SP85, RN7SL674P, NTSR2, LPIN1, MIR548S, MIR4262, SNORD18.ENSG00000238503.1, MIR3681, TRIB2, MIR3125, LINC00276, FAM84A, NBAS, DDX1, snoU13.ENSG000002…
98	2	2p23	2p22.1	0.12585	0.0792079	0.0466424	-0.0249043	0.118189	0.275126	1	NA	NA	DNMT3A, MIR1301, DTNB, ASXL2, KIF3C, RAB10, GAREML, HADHA, HADHB, EPT1, GPR113, DRC1, OTOF, C2orf70, CIB4, KCNK3, CENPA, SLC35F6, DPYSL5, MAPRE3, TMEM214, AGBL5, OST4, EMILIN1, KHK, CGREF1, ABHD1, PREB, C2orf53, TCF23, SLC5A6, ATRAID, CAD, SLC30A3, DNAJC5G, TRIM54, MPV17, UCN, GTF3C2, EIF2B4, SNX17, ZNF513, PPM1G, NRBP1, IFT172, KRTCAP3, FNDC4, GCKR, C2orf16, ZNF512, CCDC121, GPN1, SNORA36.ENSG00…
99	2	2p22.1	2p22.1	0.0918367	0.0594059	0.0324308	-0.0309213	0.0957829	0.419212	1	NA	NA	GALM, GEMIN6, SRSF7, DHX57, MORN2, ARHGEF33, RN7SL96P, SOS1, CDKL4, MAP4K3, SNORA67.ENSG00000252473.1, TMEM178A, THUMPD2, SLC8A1
100	2	2p22.1	2p21	0.0952381	0.039604	0.0556341	-0.00173721	0.113005	0.119589	1	NA	NA	HNRNPA1P57, snoZ247, C2orf91, PKDCC, EML4, COX7A2L, KCNG3, SNORD75.ENSG00000221300.1, MTA3, OXER1, HAAO, THADA, ZFP36L2, PLEKHH2, RN7SKP66, DYNC2LI1, ABCG5, ABCG8, LRPPRC, PPM1B, snoU13.ENSG00000239052.1, SLC3A1, PREPL, CAMKMT, SIX3, SIX2, SRBD1, RN7SL414P
101	2	2p21	2p21	0.085034	0.039604	0.0454301	-0.0108522	0.101712	0.197361	1	NA	NA	PRKCE
102	2	2p21-p16	2p16.3	0.0884354	0.039604	0.0488314	-0.00781952	0.105482	0.167434	1	NA	NA	EPAS1, TMEM247, RN7SL817P, ATP6V1E2, RHOQ, PIGF, CRIPT, SOCS5, MCFD2, TTC7A, CALM2, C2orf61, BCYRN1, EPCAM, RN7SKP119, MIR559, MSH2, KCNK12, MSH6, FBXO11, RN7SKP224, FOXN2, PPP1R21, STON1, GTF2A1L, LHCGR, FSHR, SNORA75.ENSG00000212580.1
103	2	2p16.3	2p16.3	0.102041	0.049505	0.0525359	-0.00876791	0.11384	0.161525	1	NA	NA	NRXN1
104	2	2p16.3	2p16.1	0.108844	0.049505	0.0593386	-0.00260316	0.12128	0.116922	1	NA	NA	MIR4431, SCARNA16.ENSG00000251942.1, ASB3, CHAC2, ERLEC1, snoU13.ENSG00000238756.1, MIR3682, GPR75, PSME4, ACYP2, C2orf73, SPTBN1, TSPYL6, EML6, RTN4, CLHC1, RPS27A, MTIF2, PRORSD1P, CCDC88A, CCDC104, SMEK2, SNORA12.ENSG00000212175.1, PNPT1, EFEMP1, RN7SKP208, MIR216A, MIR217, MIR216B, CCDC85A, RNA5SP93, snoU13.ENSG00000238690.1, SNORD78.ENSG00000212168.1
105	2	2p16.1	2p15	0.0884354	0.049505	0.0389304	-0.0210405	0.0989014	0.298016	1	NA	NA	VRK2, FANCL, RNA5SP94, MIR4432, BCL11A, RN7SL361P, PAPOLG, RN7SL632P, REL, PUS10, RNA5SP95, PEX13, KIAA1841, C2orf74, AHSA2, USP34, SNORA70B, XPO1, FAM161A, CCT4, COMMD1, B3GNT2, MIR5192, RN7SL51P, snoU13.ENSG00000238809.1, RN7SL18P, TMEM17, EHBP1
106	2	2p13	2p12	0.0884354	0.049505	0.0389304	-0.0210405	0.0989014	0.298016	1	NA	NA	OTX1, DBIL5P2, WDPCP, MDH1, RPS4XP5, UGP2, ACA59.ENSG00000251775.1, VPS54, PELI1, LINC00309, MIR4433, LGALSL, AFTPH, SERTAD2, RN7SL341P, RN7SL211P, snoU13.ENSG00000238696.1, SLC1A4, CEP68, RAB1A, SNORA74.ENSG00000272025.1, ACTR2, SPRED2, RN7SL635P, Vault.ENSG00000251900.1
107	2	2p12	2p12	0.105442	0.049505	0.0559372	-0.00568783	0.117562	0.137605	1	NA	NA	MIR4778, MEIS1, ETAA1, C1D, WDR92, PPP3R1, PNO1, CNRIP1, PLEK, APLF, ARHGAP25, FBXO48, PROKR1, BMP10, GKN2, GKN1, ANTXR1, MIR3126, RNA5SP96, GFPT1, NFU1, AAK1, RN7SL604P, SNORA36C, ANXA4, snoU13.ENSG00000238708.1, GMCL1, SNRNP27, MXD1, snoU13.ENSG00000238465.1, snoU13.ENSG00000239072.1, ASPRV1, RN7SL470P, PCBP1, C2orf42, TIA1, PCYOX1, SNRPG, FAM136A, TGFA, ADD2, FIGLA, CLEC4F, CD207, VAX2, ATP6V1…
108	2	2p12	2p12	0.119048	0.0792079	0.0398397	-0.0311878	0.110867	0.355549	1	NA	NA	LRRTM4
109	2	2p12	2p12-p11.1	0.0918367	0.0594059	0.0324308	-0.0309213	0.0957829	0.419212	1	NA	NA	RNA5SP98
110	2	2p12-p11.1	2p12	0.0952381	0.0594059	0.0358322	-0.0278376	0.0995019	0.36702	1	NA	NA	CTNNA2, REG1A, REG1B, REG1P, REG3A, REG3G
111	2	2p12	2p12	0.0952381	0.049505	0.0457331	-0.0149139	0.10638	0.220722	1	NA	NA	MIR4264, LRRTM1, RNA5SP99, RN7SL201P
112	2	2p12	2p12	0.108844	0.0594059	0.0494376	-0.0154597	0.114335	0.208358	1	NA	NA	SNORD112.ENSG00000252298.1, FUNDC2P2, SUCLG1, DNAH6, TRABD2A, TMSB10, KCMF1, TCF7L1, TGOLN2, RETSAT, ELMOD3, RN7SL113P, CAPG, SH2D6, RN7SL251P, RN7SL830P, MAT2A, GGCX, VAMP8, RN7SL126P, VAMP5, RNF181, C2orf68, TMEM150A, USP39, SFTPB, GNLY, ATOH8, RN7SKP83, ST3GAL5, POLR1A, IMMT, MIR4779, MRPL35, PTCD3, REEP1, SNORD94, U8.ENSG00000202537.1, SNORA19.ENSG00000251974.1, KDM3A, CHMP3, RNF103, RMND5A, …
113	2	2p12	2p11.1	0.115646	0.0594059	0.0562403	-0.00924573	0.121726	0.1541	1	NA	NA	IGKC, IGKJ1, IGKJ2, IGKJ3, IGKJ4, IGKJ5, RNA5SP100, SLC9B1P2
114	2	2q11.1	2q11.2	0.136054	0.138614	-0.00255944	-0.0830749	0.077956	1	1	NA	NA	ANKRD20A8P, TEKT4, RN7SL575P, MAL, MRPS5, ZNF514, ZNF2, PROM2, KCNIP3, FAHD2A, FLJ14082, LINC00342, TRIM43, ANKRD36C, FAHD2CP, RN7SL210P, GPAT2, ADRA2B, ASTL, DUSP2, STARD7, TMEM127, CIAO1, SNRNP200, ITPRIPL1, NCAPH
115	2	2q11.2	2q11.1-q11.2	0.142857	0.138614	0.00424328	-0.078366	0.0868526	1	1	NA	NA	NEURL3, ARID5A, KANSL3, FER1L5, LMAN2L, CNNM4, MIR3127, CNNM3, ANKRD23, ANKRD39, SEMA4C, FAM178B, RNA5SP101, snoU13.ENSG00000238760.1
116	2	2q11.1-q11.2	2q11.2-q12	0.153061	0.158416	-0.00535462	-0.0929561	0.0822469	1	1	NA	NA	ACTR1B, ANKRD36B, ANKRD36, COX5B, FAHD2B, RN7SL313P, ZAP70, TMEM131, VWA3B, CNGA3, INPP4A, COA5, UNC50, MGAT4A, KIAA1211L, TSGA10, C2orf15, LIPT1, MRPL30, MITD1, LYG1, LYG2, TXNDC9, EIF5B, REV1, AFF3
117	2	2q11.2	2q11.2	0.163265	0.178218	-0.0149525	-0.107367	0.0774618	0.84701	1	NA	NA	LONRF2, CHST10, NMS, RN7SL611P, PDCL3, snoU13.ENSG00000238328.1, RN7SL360P, NPAS2, RPL31, TBC1D8, RN7SL548P, CNOT11, RNF149, SNORD89, MIR5696
118	2	2q11.2	2q12.1	0.156463	0.178218	-0.0217552	-0.113816	0.0703059	0.722287	1	NA	NA	CREG2, RFX8, MAP4K4, FLJ20373, IL1R2, IL1R1, IL1RL2, IL18R1, IL1RL1, IL18RAP, MIR4772, SLC9A4, SLC9A2, MFSD9, TMEM182
119	2	2q12.1	2q12.2	0.180272	0.227723	-0.0474507	-0.146944	0.0520431	0.369506	1	NA	NA	U3.ENSG00000199727.1, SNORA72.ENSG00000207249.1, POU3F3, MRPS9, GPR45, TGFBRAP1, C2orf49, FHL2
120	2	2q12	2q11.2-q12.1	0.170068	0.19802	-0.0279518	-0.123397	0.0674934	0.628632	1	NA	NA	NCK2, C2orf40, UXS1, PLGLA, RGPD3, CD8BP, ST6GAL2
121	2	2q11.2-q12.1	2q12.3	0.173469	0.19802	-0.0245504	-0.12016	0.0710588	0.686087	1	NA	NA	GACAT1, RGPD4, SLC5A7, SULT1C3, SULT1C2, SULT1C2P1, SULT1C4, GCC2, LIMS1, RANBP2
122	2	2q12.3	2q14.1	0.190476	0.19802	-0.00754361	-0.103944	0.0888566	0.984339	1	NA	NA	CCDC138, EDAR, SH3RF3, MIR4265, MIR4266, SEPT10, SOWAHC, BUB1, LIMS3L, LIMS3.ENSG00000256977.6, LIMS3.ENSG00000257207.4, LINC00116, MALL, MIR4267, MIR4436B1, MIR4436B2, NPHP1, RGPD5, RGPD6, ACOXL, BCL2L11, ANAPC1, MERTK, RN7SL297P, TMEM87B, FBLN7, ZC3H8, snoU13.ENSG00000238951.1, ZC3H6, RGPD8, TTL, POLR1B, CHCHD5, SLC20A1, NT5DC4, CKAP2L, IL1A, IL1B, IL37, IL36G, IL36A, IL36B, IL36RN, IL1F10, IL1…
123	2	2q14.1	2q21.1	0.193878	0.217822	-0.0239442	-0.122911	0.0750227	0.707778	1	NA	NA	DDX18, HTR5BP, CCDC93, RN7SL111P, INSIG2, EN1, MARCO, C1QL2, RN7SL468P, STEAP3, C2orf76, DBI, TMEM37, SCTR, PCDP1, TMEM177, PTPN4, snoU13.ENSG00000238368.1, EPB41L5, TMEM185B, RALB, INHBB, FLJ14816, GLI2, TFCP2L1, CLASP1, RNU4ATAC, snoU13.ENSG00000238341.1, MKI67IP, TSN
124	2	2q21.1	2q14	0.217687	0.237624	-0.0199367	-0.122062	0.0821891	0.781917	1	NA	NA	RN7SKP102, CNTNAP5, RNA5SP102, GYPC, BIN1
125	2	2q14.3	2q21.2	0.238095	0.257426	-0.0193305	-0.124169	0.0855084	0.797715	1	NA	NA	CYP27C1, ERCC3, MAP3K2, MIR4783, PROC, IWS1, MYO7B, LIMS2, GPR17, SFT2D3, WDR33, RNY4P7, POLR2D, AMMECR1L, SAP130, UGGT1, RN7SL206P, HS6ST1, RNA5SP103, snoU13.ENSG00000238546.1, RAB6C, CCDC115, CCDC74B, CYP4F43P, IMP4, MZT2B, POTEF, PTPN18, SMPD4, TUBA3E, CFC1B, CFC1, CYP4F30P, POTEI, POTEJ, GPR148, AMER3, ARHGEF4, SCARNA4.ENSG00000252829.2, FAM168B, PLEKHB2, CYP4F31P, MIR4784, MZT2A, POTEE, TUBA…
126	2	2q21.2	2q21.2	0.255102	0.287129	-0.0320267	-0.140009	0.0759555	0.617388	1	NA	NA	NCKAP5
127	2	2q21.2	2q21.3	0.244898	0.267327	-0.0224288	-0.128406	0.0835489	0.752266	1	NA	NA	RN7SKP154, RN7SKP93, MGAT5, MIR3679, RNA5SP104, TMEM163, ACMSD, MIR5590, CCNT2, MAP3K19, RAB3GAP1, snoU13.ENSG00000238337.1, SNORA40.ENSG00000208308.1, ZRANB3, R3HDM1, UBXN4, LCT, MCM6, DARS
128	2	2q21	2q22.1	0.251701	0.277228	-0.025527	-0.132587	0.0815333	0.708446	1	NA	NA	CXCR4, RN7SKP141, THSD7B
129	2	2q22.1	2q22.1	0.265306	0.287129	-0.0218226	-0.13012	0.0864746	0.767241	1	NA	NA	RNA5SP105, HNMT, SPOPL, NXPH2, RN7SKP286, SNORA72.ENSG00000206901.1, RN7SL283P
130	2	2q21.2	2q21.2	0.340136	0.415842	-0.0757055	-0.192683	0.0412715	0.212131	1	NA	NA	LRP1B
131	2	2q22.2	2q22.3	0.27551	0.316832	-0.0413215	-0.152091	0.0694477	0.505948	1	NA	NA	KYNU, ARHGAP15, GTDC1, ZEB2, TEX41, snR65.ENSG00000253036.1
132	2	2q22.3	2q22.3	0.265306	0.29703	-0.0317236	-0.140788	0.077341	0.625744	1	NA	NA	snoU13.ENSG00000238860.1, RNA5SP106
133	2	2q22.3	2q23.1	0.27551	0.306931	-0.0314205	-0.141507	0.078666	0.633732	1	NA	NA	ACVR2A, ORC4, MBD5, SNORA48.ENSG00000212181.1
134	2	2q23.1	2q24.1	0.302721	0.306931	-0.0042096	-0.112577	0.104158	1	1	NA	NA	EPC2, KIF5C, LYPD6B, LYPD6, MMADHC, RND3, RBM43, NMI, TNFAIP6, RN7SL124P, RIF1, NEB, ARL5A, CACNB4, STAM2, FMNL2, PRPF40A, ARL6IP6, SNORD56.ENSG00000200377.1, RPRM, GALNT13, RNA5SP107, KCNJ3
135	2	2q22-q23	2q24.1	0.265306	0.306931	-0.0416246	-0.151415	0.0681656	0.497529	1	NA	NA	NR4A2, snoU13.ENSG00000238543.1, snoU13.ENSG00000238481.1, GPD2, GALNT5, RN7SKP281, ERMN, CYTIP, ACVR1C, ACVR1, UPP2, CCDC148, RN7SL393P, PKP4, snoZ5, DAPL1
136	2	2q24.2	2q24.2	0.272109	0.287129	-0.0150199	-0.123519	0.0934794	0.871047	1	NA	NA	TANC1, WDSUB1, BAZ2B, MARCH7, CD302, LY75, PLA2R1, ITGB6
137	2	2q24.2	2q24.2	0.261905	0.247525	0.01438	-0.0903015	0.119062	0.878309	1	NA	NA	RBMS1, RMRPP3, MIR4785
138	2	2q24.2	2q24.2	0.251701	0.247525	0.00417593	-0.097699	0.106051	1	1	NA	NA	RN7SL423P, TANK, PSMD14, TBR1, snoU13.ENSG00000238570.1
139	2	2q24.2	2q24.3	0.261905	0.267327	-0.00542197	-0.110721	0.0998766	1	1	NA	NA	SLC4A10, DPP4, GCG, FAP, IFIH1, GCA, KCNH7, RNA5SP109, FIGN
140	2	2q22-q24	2q31.2	0.292517	0.29703	-0.0045127	-0.112204	0.103178	1	1	NA	NA	GRB14, COBLL1, SNORA70F, RNA5SP110, RNA5SP111, SLC38A11, SCN3A, RN7SL455P, SCN2A, CSRNP3, GALNT3, TTC21B, SCN1A, RN7SKP152, SCN9A, snoU13.ENSG00000238662.1, SCN7A, XIRP2, B3GALT1, STK39, RN7SL95P, RN7SL813P, CERS6, MIR4774, NOSTRIN, SPC25, G6PC2, ABCB11, DHRS9, LRP2, BBS5, KLHL41, FASTKD1, PPIG, CCDC173, KLHL23, PHOSPHO2, SNORA51.ENSG00000206961.1, SSB, METTL5, U3.ENSG00000252981.1, UBR3, MYO3B, …
141	2	2q31.2	2q31.2	0.265306	0.267327	-0.00202061	-0.104023	0.0999818	1	1	NA	NA	RNA5SP112, HNRNPA3, NFE2L2, MIR3128, snoU13.ENSG00000238295.1, AGPS
142	2	2q31.2	2q31.2-q31.3	0.278912	0.267327	0.0115848	-0.0954525	0.118622	0.92376	1	NA	NA	TTC30B, TTC30A, PDE11A, RBM45, OSBPL6, PRKRA, DFNB59, FKBP7, PLEKHA3, TTN, CCDC141, ACA59.ENSG00000252000.1, SESTD1, snoU13.ENSG00000238339.1
143	2	2q31.2-q31.3	2q31.3	0.272109	0.267327	0.00478211	-0.100187	0.109751	1	1	NA	NA	ZNF385B, MIR1258, SNORA43.ENSG00000202216.1, CWC22
144	2	2q32.1	2q31.3	0.272109	0.277228	-0.00511888	-0.111277	0.101039	1	1	NA	NA	UBE2E3, MIR4437, ITGA4, CERKL
145	2	2q32	2q32.1	0.268707	0.29703	-0.0283222	-0.137488	0.0808435	0.674226	1	NA	NA	NEUROD1, RNU6ATAC19P, SSFA2, PPP1R1C, RNA5SP113, PDE1A, RN7SL267P, DNAJC10, FRZB, NCKAP1, SNORA77.ENSG00000221498.1, DUSP19, NUP35, snoU13.ENSG00000238306.1, MIR548AE1, ZNF804A, FSIP2, U8.ENSG00000212581.1
146	2	2q32.1	2q32.1	0.27551	0.306931	-0.0314205	-0.141507	0.078666	0.633732	1	NA	NA	ZC3H15
147	2	2q31-q32	2q31-q32	0.285714	0.306931	-0.0212164	-0.131585	0.0891525	0.781023	1	NA	NA	ITGAV
148	2	2q32.1	2q32.1	0.289116	0.306931	-0.017815	-0.128275	0.0926449	0.831695	1	NA	NA	FAM171B, ZSWIM2, RN7SKP42, CALCRL, TFPI, RNA5SP114, GULP1, MIR561
149	2	2q33	2q33	0.282313	0.287129	-0.00481579	-0.111771	0.102139	1	1	NA	NA	DIRC1
150	2	2q31	2q12-q34	0.29932	0.29703	0.00229002	-0.103354	0.107934	1	1	NA	NA	COL3A1, MIR1245A, COL5A2, MIR3129, WDR75, SLC40A1, ASNSD1, ANKAR, OSGEPL1, ORMDL1, PMS1, C2orf88, MSTN, HIBCH, INPP1, MFSD6, TMEM194B, RN7SKP179, NAB1, GLS, STAT1, STAT4, MYO1B
151	2	2q32.3	2q32-q33	0.289116	0.306931	-0.017815	-0.128275	0.0926449	0.831695	1	NA	NA	NABP1, SDPR
152	2	2q32.3	2q32	0.292517	0.29703	-0.0045127	-0.112204	0.103178	1	1	NA	NA	TMEFF2, PCGEM1
153	2	2q32	2q33	0.336735	0.316832	0.019903	-0.0923453	0.132151	0.807195	1	NA	NA	SNORD59.ENSG00000252517.1, SLC39A10, DNAH7, STK17B, HECW2, snoU13.ENSG00000239161.1, RN7SL820P, CCDC150, SCARNA16.ENSG00000252923.1, GTF3C3, C2orf66, PGAP1, ANKRD44, SF3B1, SNORA4.ENSG00000202434.1, COQ10B, HSPD1, HSPE1, MOB4, RFTN2, MARS2, BOLL, PLCL1
154	2	2q33	2q33	0.346939	0.29703	0.0499091	-0.0611552	0.160973	0.426543	1	NA	NA	SATB2
155	2	2q33.1	2q33	0.360544	0.326733	0.0338115	-0.0795127	0.147136	0.621937	1	NA	NA	FTCDNL1, RN7SL717P, C2orf69, TYW5, C2orf47, SPATS2L, KCTD18, SGOL2, AOX1
156	2	2q33.1	2q33.1	0.37415	0.326733	0.047417	-0.0661281	0.160962	0.462058	1	NA	NA	AOX2P, BZW1, RNA5SP115, CLK1, PPIL3, NIF3L1, ORC2, RN7SL694P, FAM126B, NDUFB3, CFLAR, CASP10, CASP8, ALS2CR12
157	2	2q33	2q33	0.384354	0.336634	0.0477201	-0.066566	0.162006	0.461335	1	NA	NA	TRAK2, STRADB, ALS2CR11, TMEM237, MPP4, ALS2, CDK15, FZD7, snoU13.ENSG00000238770.1, SUMO1, NOP58, SNORD70.ENSG00000212534.1, SNORD70.ENSG00000212309.1, SNORD11B, SNORD11.ENSG00000238317.1, RN7SL753P, RN7SL40P, BMPR2, FAM117B, ICA1L, WDR12, CARF, NBEAL1, SNORA1.ENSG00000202059.1, CYP20A1, RN7SL670P, ABI2, RAPH1, CD28, CTLA4, ICOS
158	2	2q33.3	2q33.3	0.401361	0.366337	0.0350239	-0.0810277	0.151076	0.614398	1	NA	NA	PARD3B
159	2	2q33.3	2q34-q35	0.414966	0.356436	0.0585303	-0.0571929	0.174254	0.35853	1	NA	NA	NRP2, RN7SKP178, INO80D, Vault.ENSG00000252485.1, NDUFS1, EEF1B2, SNORA41.ENSG00000207406.1, SNORD51.ENSG00000207047.2, GPR1, RN7SKP200, RN7SKP260, ZDBF2, ADAM23, DYTN, MDH1B, FASTKD2, CPO, KLF7, MIR2355, CREB1, METTL21A, CCNYL1, MIR4775, FZD5, PLEKHM3, RNA5SP116, snoU13.ENSG00000238582.1, CRYGEP, CRYGD, CRYGC, CRYGB, CRYGA, C2orf80, IDH1, PIKFYVE, PTH2R, RNA5SP117
160	2	2q34-q35	2q35	0.435374	0.39604	0.0393345	-0.0782647	0.156934	0.566522	1	NA	NA	MAP2, RNA5SP118, UNC80, RPE, KANSL1L, ACADL, MYL1, LANCL1, CPS1
161	2	2q33.3-q34	2q33.3-q34	0.462585	0.465347	-0.0027615	-0.118267	0.112744	1	1	NA	NA	ERBB4
162	2	2q33.3-q34	2q34	0.431973	0.415842	0.0161312	-0.102078	0.134341	0.868056	1	NA	NA	RNA5SP119
163	2	2q34	2q34	0.44898	0.415842	0.033138	-0.08519	0.151466	0.643661	1	NA	NA	MIR548F2
164	2	2q34	2q34	0.452381	0.415842	0.0365394	-0.0818083	0.154887	0.601895	1	NA	NA	IKZF2
165	2	2q34	2q34	0.47619	0.445545	0.0306459	-0.0884993	0.149791	0.676736	1	NA	NA	SPAG16
166	2	2q34	2q34-q35	0.459184	0.425743	0.0334411	-0.0852083	0.152091	0.640617	1	NA	NA	MIR4438
167	2	2q34-q35	2q34	0.472789	0.435644	0.0371456	-0.0817906	0.156082	0.595957	1	NA	NA	VWC2L, BARD1, SNORA70.ENSG00000207274.1, ABCA12, snoU13.ENSG00000238663.1, ATIC, FN1
168	2	2q35	2q36.1	0.486395	0.445545	0.04085	-0.0783174	0.160017	0.552701	1	NA	NA	LINC00607, MREG, PECR, TMEM169, XRCC5, MARCH4, SMARCAL1, RPL37A, IGFBP2, IGFBP5, RNA5SP120, TNP1, RN7SKP43, DIRC3, TNS1, RUFY4, CXCR2P1, CXCR2, CXCR1, snoU13.ENSG00000238428.1, ARPC2, AAMP, GPBAR1, PNKD, TMBIM1, snoU13.ENSG00000238736.1, C2orf62, SLC11A1, CTDSP1, MIR26B, VIL1, USP37, RN7SKP38, RQCD1, PLCD4, U3.ENSG00000252805.1, ZNF142, BCS1L, RNF25, STK36, TTLL4, CYP27A1, PRKAG3, WNT6, WNT10A, C…
[truncated: 933 more rows]

## Sheet: COADREAD
Bin Information				Proportion		ΔProportion	Confidence Interval		p/q-values
[truncated: 504 more rows]

## Sheet: GBM
Bin Information				Proportion		ΔProportion	Confidence Interval		p/q-values
[truncated: 1,367 more rows]

## Sheet: HNSC
Bin Information				Proportion		ΔProportion	Confidence Interval		p/q-values
[truncated: 765 more rows]

[truncated: 12 more sheets: KIRC, KIRP, LGG, LIHC, LUAD, LUSC, PAAD, PCPG, SARC, STES, THCA, THYM]
