# Supplementary material for: Sex Differences in Cancer Driver Genes and Biomarkers
Source: Oxford University Press journal article supplement (doi:10.1158/0008-5472.can-18-0362), 2018-10-01
Supplement: 00085472can180362-sup-196527_2_supp_4837888_pbkprb.xlsx [file 00085472can180362-sup-196527_2_supp_4837888_pbkprb.xlsx]

## Sheet: DataSummary
		CNA Data			SNV Data
Disease Code	Tumour Type	No. Male samples	No. Female samples	Total samples	No. Male samples	No. Female samples	Total samples
LAML	Acute Myeloid Leukemia	104	86	190	103	89	192
BLCA	Bladder Urothelial Carcinoma	294	101	395	287	96	383
COADREAD	Colon & Rectum Adenocarcinoma	317	273	590	257	211	468
GBM	Glioblastoma Multiforme	340	223	563	175	101	276
HNSC	Head and Neck Squamous Cell Carcinoma	378	136	514	369	134	503
KIRC	Kidney Renal Clear Cell Carcinoma	336	185	521	280	151	431
KIRP	Kidney Renal Papillary Cell Carcinoma	212	75	287	206	75	281
LGG	Lower Grade Glioma	281	228	509	282	230	512
LIHC	Liver Hepatocellular Carcinoma	251	116	367	251	119	370
LUAD	Lung Adenocarcinoma	239	273	512	220	257	477
LUSC	Lung Squamous Cell Carcinoma	370	130	500	131	47	178
PAAD	Pancreatic Adenocarcinoma	101	82	183	75	51	126
PCPG	Pheochromocytoma and Paraganglioma	74	88	162	78	101	179
SARC	Sarcoma	113	134	247	109	129	238
SKCM	Skin Cutaneous Melanoma	227	136	363	180	107	287
STES	Stomach and Esophageal Carcinoma	434	180	614	401	167	568
THCA	Thyroid Carcinoma	131	361	492	127	358	485
THYM	Thymoma	63	59	122	60	59	119
PANCANCER	Total samples	4265	2866	7131	3591	2482	6073

## Sheet: ModelVariables
Tumour Type	Applied MV Model	Tumour-type	Sex	Stage	Race	Age	Grade	Smoking History	Subsite	Subtype	Alcohol	Hepatitis	Microsatellite Instability	MMR	TMN
BLCA	YES	NA	x	x	x	x	x	x	>50% missing	x	NA	NA	NA	NA	available
COADREAD	YES	NA	x	x	x	x	NA	NA	x	x	NA	NA	x	available	available
GBM	YES	NA	x	NA	x	x	>50% missing	NA	NA	x	NA	NA	NA	NA
HNSC	YES	NA	x	x	x	x	x	x	x	all the same	NA	NA	NA	NA
KIRC	YES	NA	x	x	x	x	x	>50% missing	NA	NA	NA	NA	NA	NA	available
KIRP	YES	NA	x	x	x	x	NA	x	NA	NA	NA	NA	NA	NA	available
LAML	NO
LGG	NO
LIHC	YES	NA	x	x	x	x	x	NA	NA	all the same	x	x	NA	NA	available
LUAD	YES	NA	x	x	x	x	NA	x	correlated with race	all the same	NA	NA	NA	NA	available
LUSC	YES	NA	x	x	x	x	NA	x	x	all the same	NA	NA	NA	NA	available
PAAD	YES	NA	x	x	x	x	NA	correlated with sex	x	NA	NA	NA	x	NA
PCPG	NO
SARC	YES	NA	x	NA	x	x	NA	NA	NA	x	NA	NA	NA	NA
SKCM	YES	NA	x	x	x	x	NA	NA	x	NA	NA	NA	NA	NA	available
STES	YES	NA	x	x	x	x	correlated with type	>50% missing	correlated with type	x	NA	NA	>20% missing (included in MSI-specific analyses only)	NA	available
THCA	NO
THYM	NO
Pancancer		x	x		x	x
Multivariate modeling only applied when univariate analyses identified putative sex-biased effects
not included in model
included in model

## Sheet: BLCAData
Variable	Groups	Total	Male	Female	χ2 test p-value
Sex	male	294	294 (100%)	0 (0%)
	female	101	0 (0%)	101 (100%)	-
Stage	stage I	2	2 (0.68%)	0 (0%)
	stage II	127	97 (33%)	30 (29.7%)
	stage III	135	98 (33.3%)	37 (36.6%)
	stage IV	129	95 (32.3%)	34 (33.7%)
	stage.NA	2	2 (0.68%)	0 (0%)	0.7496
Race	White	317	238 (81%)	79 (78.2%)
	Asian	43	35 (11.9%)	8 (7.92%)
	Black/African American	19	12 (4.08%)	7 (6.93%)
	race.NA	16	9 (3.06%)	7 (6.93%)	0.3066
Grade	high grade	371	271 (92.2%)	100 (99%)
	low grade	21	20 (6.8%)	1 (0.99%)
	grade.NA	3	3 (1.02%)	0 (0%)	0.04488
Smoking History	lifelong non-smoker	100	64 (21.8%)	36 (35.6%)
	current reformed smoker	193	152 (51.7%)	41 (40.6%)
	current smoker	89	69 (23.5%)	20 (19.8%)
	smoking.status.NA	13	9 (3.06%)	4 (3.96%)	0.01748
Histological Subtype	non-papillary	261	185 (62.9%)	76 (75.2%)
	papillary	129	105 (35.7%)	24 (23.8%)
	hist.type.NA	5	4 (1.36%)	1 (0.99%)	0.03451
Age		395	34-75 (67.5)	43-78 (70)	0.2453
Notes
For categorical variables: Numbers of males and females in each group with (percentage of males/females in each group)
For age: Min-Max (Median)

## Sheet: COADREADData
Variable	Groups	Total	Male	Female	χ2 test p-value
Sex	male	317	317 (100%)	0 (0%)
	female	273	0 (0%)	273 (100%)	-
Stage	stage I	103	59 (18.6%)	44 (16.1%)
	stage II	208	113 (35.6%)	95 (34.8%)
	stage III	172	85 (26.8%)	87 (31.9%)
	stage IV	88	49 (15.5%)	39 (14.3%)
	stage.NA	19	11 (3.47%)	8 (2.93%)	0.5791
Histological Subtype	colon adenocarcinoma	370	200 (63.1%)	170 (62.3%)
	rectal adenocarcinoma	141	76 (24%)	65 (23.8%)
	colon mucinous adenocarcinoma	55	27 (8.52%)	28 (10.3%)
	rectal mucinous adenocarcinoma	13	8 (2.52%)	5 (1.83%)
	hist.type.NA	11	6 (1.89%)	5 (1.83%)	0.8466
Subsite	proximal colon	246	133 (42%)	113 (41.4%)
	distal colon	172	91 (28.7%)	81 (29.7%)
	rectum	153	83 (26.2%)	70 (25.6%)
	subsite.NA	19	10 (3.15%)	9 (3.3%)	0.9636
Race	White	286	152 (47.9%)	134 (49.1%)
	Asian	12	9 (2.84%)	3 (1.1%)
	Black/African American	63	30 (9.46%)	33 (12.1%)
	race.NA	229	126 (39.7%)	103 (37.7%)	0.2161
MSI	MSS	330	238 (75%)	179 (65.6%)
	MSI-L	74	43 (13.6%)	51(18.7%)
	MSI-H	63	36 (11.5%)	40 (14.7%)
	Indeterminate	1	0 (0%)	3 (1.1%)	0.02919
Age		590	31-74 (67)	31-76 (66)	0.1464
Notes
For categorical variables: Numbers of males and females in each group with (percentage of males/females in each group)
For age: Min-Max (Median)

## Sheet: GBMData
Variable	Groups	Total	Male	Female	χ2 test p-value
Sex	male	340	340 (100%)	0 (0%)
	female	223	0 (0%)	223 (100%)	-
Race	White	479	288 (84.7%)	191 (85.7%)
	Asian	13	10 (2.94%)	3 (1.35%)
	Black/African American	49	29 (8.53%)	20 (8.97%)
	race.NA	22	13 (3.82%)	9 (4.04%)	0.4655
Histological Subtype	untreated primary (de novo) gbm	516	312 (91.8%)	204 (91.5%)
	glioblastoma multiforme (gbm)	29	19 (5.59%)	10 (4.48%)
	treated primary gbm	18	9 (2.65%)	9 (4.04%)	0.5677
Age		563	21-67 (59)	18-69.5 (59)	0.3948
Notes
For categorical variables: Numbers of males and females in each group with (percentage of males/females in each group)
For age: Min-Max (Median)

## Sheet: HNSCData
Variable	Groups	Total	Male	Female	χ2 test p-value
Sex	male	378	378 (100%)	0 (0%)
	female	136	0 (0%)	136 (100%)	-
Stage	stage I	26	14 (3.7%)	12 (8.82%)
	stage II	74	49 (13%)	25 (18.4%)
	stage III	80	59 (15.6%)	21 (15.4%)
	stage IV	262	198 (52.4%)	64 (47.1%)
	stage.NA	72	58 (15.3%)	14 (10.3%)	0.06328
Race	White	439	316 (83.6%)	123 (90.4%)
	Asian	11	7 (1.85%)	4 (2.94%)
	Black/African American	48	41 (10.8%)	7 (5.15%)
	race.NA	16	14 (3.7%)	2 (1.47%)	0.1063
Smoking History	lifelong non-smoker	120	68 (18%)	52 (38.2%)
	current reformed smoker	207	163 (43.1%)	44 (32.4%)
	current smoker	174	140 (37%)	34 (25%)
	smoking.status.NA	13	7 (1.85%)	6 (4.41%)	3.792e-06
Subsite	oral cavity	307	206 (54.5%)	101 (74.3%)
	larynx	116	96 (25.4%)	20 (14.7%)
	oropharynx	81	69 (18.3%)	12 (8.82%)
	hypopharynx	10	7 (1.85%)	3 (2.21%)	0.0006081
Age		514	19-66.75 (59)	24-74.25 (64)	0.0001725
Notes
For categorical variables: Numbers of males and females in each group with (percentage of males/females in each group)
For age: Min-Max (Median)

## Sheet: KIRCData
Variable	Groups	Total	Male	Female	χ2 test p-value
Sex	male	336	336 (100%)	0 (0%)
	female	185	0 (0%)	185 (100%)	-
Stage	stage I	258	154 (45.8%)	104 (56.2%)
	stage II	56	42 (12.5%)	14 (7.57%)
	stage III	122	80 (23.8%)	42 (22.7%)
	stage IV	83	58 (17.3%)	25 (13.5%)
	stage.NA	2	2 (0.595%)	0 (0%)	0.0938
Race	White	450	300 (89.3%)	150 (81.1%)
	Asian	8	4 (1.19%)	4 (2.16%)
	Black/African American	56	27 (8.04%)	29 (15.7%)
	race.NA	7	5 (1.49%)	2 (1.08%)	0.01716
Grade	g1	14	6 (1.79%)	8 (4.32%)
	g2	222	129 (38.4%)	93 (50.3%)
	g3	201	147 (43.8%)	54 (29.2%)
	g4	76	50 (14.9%)	26 (14.1%)
	gx	5	2 (0.595%)	3 (1.62%)
	grade.NA	3	2 (0.595%)	1 (0.541%)	0.005292
Age		521	26-68 (59)	29-72 (63)	0.4471
Notes
For categorical variables: Numbers of males and females in each group with (percentage of males/females in each group)
For age: Min-Max (Median)

## Sheet: KIRPData
Variable	Groups	Total	Male	Female	χ2 test p-value
Sex	male	212	212 (100%)	0 (0%)
	female	75	0 (0%)	75 (100%)	-
Stage	stage I	170	128 (60.4%)	42 (56%)
	stage II	21	15 (7.08%)	6 (8%)
	stage III	52	37 (17.5%)	15 (20%)
	stage IV	15	11 (5.19%)	4 (5.33%)
	stage.NA	29	21 (9.91%)	8 (10.7%)	0.8313
Race	White	203	153 (72.2%)	50 (66.7%)
	Asian	6	3 (1.42%)	3 (4%)
	Black/African American	61	40 (18.9%)	21 (28%)
	race.NA	17	16 (7.55%)	1 (1.33%)	0.1469
Smoking History	lifelong non-smoker	115	81 (38.2%)	34 (45.3%)
	current reformed smoker	94	71 (33.5%)	23 (30.7%)
	current smoker	35	25 (11.8%)	10 (13.3%)
	smoking.status.NA	43	35 (16.5%)	8 (10.7%)	0.7047
Age		287	28-71 (62)	28-67 (59)	0.328
Notes
For categorical variables: Numbers of males and females in each group with (percentage of males/females in each group)
For age: Min-Max (Median)

## Sheet: LIHCData
Variable	Groups	Total	Male	Female	χ2 test p-value
Sex	male	251	251 (100%)	0 (0%)
	female	116	0 (0%)	116 (100%)	-
Stage	stage I	173	124 (49.4%)	49 (42.2%)
	stage II	87	60 (23.9%)	27 (23.3%)
	stage III	79	52 (20.7%)	27 (23.3%)
	stage IV	5	1 (0.398%)	4 (3.45%)
	stage.NA	23	14 (5.58%)	9 (7.76%)	0.08768
Race	White	181	102 (40.6%)	79 (68.1%)
	Asian	158	126 (50.2%)	32 (27.6%)
	Black/African American	17	14 (5.58%)	3 (2.59%)
	race.NA	11	9 (3.59%)	2 (1.72%)	1.064e-05
Grade	g1	51	36 (14.3%)	15 (12.9%)
	g2	177	123 (49%)	54 (46.6%)
	g3	122	82 (32.7%)	40 (34.5%)
	g4	13	8 (3.19%)	5 (4.31%)
	grade.NA	4	2 (0.797%)	2 (1.72%)	0.9036
Alcohol	Not risk factor	215	127 (50.6%)	88 (75.9%)
	Risk factor	134	113 (45%)	21 (18.1%)
	alcohol.NA	18	11 (4.38%)	7 (6.03%)	1.344e-06
Hepatitis	Not risk factor1	194	113 (45%)	81 (69.8%)
	Risk factor1	155	127 (50.6%)	28 (24.1%)
	hepatitis.NA	18	11 (4.38%)	7 (6.03%)	3.687e-06
Age		367	23-68 (60)	23-68 (60)	0.332
Notes
For categorical variables: Numbers of males and females in each group with (percentage of males/females in each group)
For age: Min-Max (Median)

## Sheet: LUADData
Variable	Groups	Total	Male	Female	χ2 test p-value
Sex	male	239	239 (100%)	0 (0%)
	female	273	0 (0%)	273 (100%)
	stage I	274	115 (48.1%)	159 (58.2%)	-
Stage	stage II	123	68 (28.5%)	55 (20.1%)
	stage III	82	37 (15.5%)	45 (16.5%)
	stage IV	25	14 (5.86%)	11 (4.03%)
	stage.NA	8	5 (2.09%)	3 (1.1%)	0.07049
Race	White	386	174 (72.8%)	212 (77.7%)
	Asian	7	4 (1.67%)	3 (1.1%)
	Black/African American	52	23 (9.62%)	29 (10.6%)
	race.NA	67	38 (15.9%)	29 (10.6%)	0.8086
Smoking History	lifelong non-smoker	73	20 (8.37%)	53 (19.4%)
	current reformed smoker	305	143 (59.8%)	162 (59.3%)
	current smoker	121	69 (28.9%)	52 (19%)
	smoking.status.NA	13	7 (2.93%)	6 (2.2%)	0.0003168
Age		512	38-72 (66)	33-73 (65)	0.981
Notes
For categorical variables: Numbers of males and females in each group with (percentage of males/females in each group)
For age: Min-Max (Median)

[truncated: 5 more sheets: LUSCData, PAADData, SARCData, SKCMData, STESData]
